# Supplementary material for: Regular patterns of the effects of hydrogen-containing additives on the formation of CdSe monomer
Source: Royal Society of Chemistry journal article supplement (doi:10.1039/c8cp02980f), 2018-01-01
Supplement: c8cp02980f1.pdf [file c8cp02980f1.pdf]

# Electronic Supplementary Information

## Regular Patterns of the Effects of Hydrogen-Containing Additives on the Formation of CdSe Monomer

*Ting Qi,<sup>a</sup> Ya-Jing Lyu,<sup>b</sup> Zhao-Meng Wang,<sup>a</sup> Hua-Qing Yang<sup>\*a</sup> and Chang-Wei Hu<sup>b</sup>*

<sup>a</sup> College of Chemical Engineering, Sichuan University, Chengdu, Sichuan, 610065, P.R. China

<sup>b</sup> Key Laboratory of Green Chemistry and Technology, Ministry of Education, College of Chemistry,  
Sichuan University, Chengdu, Sichuan, 610064, P.R. China

\* H.-Q. Yang; e-mail: huaqingyang@scu.edu.cn; Fax: 028-85415608; Telephone: 028-85415608

*Physical Chemistry Chemical Physics*

## Table of Contents

**Figure S1.** The geometric structures of various species (a), and the schematic energy diagrams (b) for the reaction (3)  $\text{Cd}(\text{OA})_2 + \text{HY} \rightarrow \text{RCOOCd} - \text{Y} + \text{RCOOH}$ ,  $\text{Y} = -\text{SR}$  (C4) and  $-\text{OR}$  (C5), respectively. Bond lengths are reported in Å. Relative Gibbs free energies ( $G_r$ ,  $\text{kJ mol}^{-1}$ ) for the corresponding species relative to  $\text{Cd}(\text{OA})_2 + \text{HY}$  ( $\text{HY} = \text{RSH}$  and  $\text{ROH}$ ) at the M06//B3LYP/6-31++G(d, p), SDD level are shown. ....5

**Figure S2.** The geometric structures of various species (a), and the schematic energy diagrams (b) for the reaction (S1)  $\text{Cd}(\text{OA})_2 + \text{SePPh}_2\text{H} + \text{RSH} \rightarrow \text{RS}-\text{CdSe}-\text{PPh}_2$  (J) + 2RCOOH calculated at the M06//B3LYP/6-31++G(d, p), SDD level are shown. Bond lengths are reported in Å. Relative Gibbs free energies ( $G_r$ ,  $\text{kJ mol}^{-1}$ ) for the corresponding species plus RCOOH form C + RSH to J, for the corresponding species plus  $\text{HPPh}_2 + \text{RCOOH} - \text{SePPh}_2\text{H}$  from F + RSH to K-i, for the corresponding species plus  $2\text{RCOOH} - \text{SePPh}_2\text{H}$  from K-i and E to J, and for the corresponding species plus  $2\text{RCOOH} - \text{HPPh}_2$  from G + RSH to J are shown relative to  $\text{Cd}(\text{OA})_2 + \text{SePPh}_2\text{H} + \text{RSH}$ . Green, red, blue, and black lines represent the reaction (S1-1)  $\text{C} + \text{RSH} \rightarrow \text{J} + \text{RCOOH}$ , (S1-2)  $\text{E} + \text{RSH} \rightarrow \text{J} + \text{SePPh}_2\text{H}$ , (S1-3)  $\text{F} + \text{RSH} + \text{HPPh}_2 \rightarrow \text{J} + \text{RCOOH} + \text{SePPh}_2\text{H}$ , and (S1-4)  $\text{G} + \text{RSH} \rightarrow \text{J} + \text{HPPh}_2$ , respectively. ....7

**Figure S3.** The geometric structures of various species (a), and the schematic energy diagrams (b) for the reaction (S2)  $\text{Cd}(\text{OA})_2 + 2\text{SePPh}_2\text{H} + \text{RSH} \rightarrow \text{Ph}_2\text{P}-\text{SeCdSe}-\text{SR}$  (K) +  $\text{HPPh}_2 + 2\text{RCOOH}$  calculated at the M06//B3LYP/6-31++G(d, p), SDD level are shown. Bond lengths are reported in Å. Relative Gibbs free energies ( $G_r$ ,  $\text{kJ mol}^{-1}$ ) for the corresponding species plus  $\text{HPPh}_2 + \text{RCOOH}$  from F + RSH to K, for the corresponding species plus  $\text{HPPh}_2 + 2\text{RCOOH}$  from K-i to K, and for the corresponding species plus  $2\text{RCOOH}$  from E-i + RSH to K are shown relative to  $\text{Cd}(\text{OA})_2 + 2\text{SePPh}_2\text{H} + \text{RSH}$ . Blue, red, and green lines represent the reaction (S2-1)  $\text{F} + \text{RSH} \rightarrow \text{K} + \text{RCOOH}$ , (S2-2)  $\text{K-i} \rightarrow \text{K}$ , and (S2-3)  $\text{E-i} + \text{RSH} \rightarrow \text{K} + \text{HPPh}_2$ , respectively. ....9

**Figure S4.** The geometric structures of various species (a), and the schematic energy diagrams (b) for the reaction (S3)  $\text{Cd}(\text{OA})_2 + \text{SePPh}_2\text{H} + \text{ROH} \rightarrow \text{RO}-\text{CdSe}-\text{PPh}_2$  (M) + 2RCOOH calculated at the M06//B3LYP/6-31++G(d, p), SDD level are shown. Bond lengths are reported in Å. Relative Gibbs free energies ( $G_r$ ,  $\text{kJ mol}^{-1}$ ) for the corresponding species plus RCOOH form C + ROH to M, for the corresponding species plus  $\text{HPPh}_2 + \text{RCOOH} - \text{SePPh}_2\text{H}$  from F + ROH to N-i, for the corresponding species plus  $2\text{RCOOH} - \text{SePPh}_2\text{H}$  from N-i +  $\text{HPPh}_2$  and E + ROH to M, and for the corresponding species plus  $2\text{RCOOH} - \text{HPPh}_2$  from G + ROH to M are shown relative to  $\text{Cd}(\text{OA})_2 + \text{SePPh}_2\text{H} + \text{ROH}$ . Green, red, blue, and black lines represent the reaction (S3-1)  $\text{C} + \text{ROH} \rightarrow \text{M} + \text{RCOOH}$ , (S3-2)  $\text{E} + \text{ROH} \rightarrow \text{M} + \text{SePPh}_2\text{H}$ , (S3-3)  $\text{F} + \text{ROH} + \text{HPPh}_2 \rightarrow \text{M} + \text{RCOOH} + \text{SePPh}_2\text{H}$ , and (S3-4)  $\text{G} + \text{ROH} \rightarrow \text{M} + \text{HPPh}_2$ , respectively. ....11

**Figure S5.** The geometric structures of various species (a), and the schematic energy diagrams (b) for the reaction (S4)  $\text{Cd}(\text{OA})_2 + 2\text{SePPh}_2\text{H} + \text{ROH} \rightarrow \text{Ph}_2\text{P}-\text{SeCdSe}-\text{OR}$  (N) +  $\text{HPPh}_2 + 2\text{RCOOH}$  are shown. Bond lengths are reported in Å. Relative Gibbs free energies ( $G_r$ ,  $\text{kJ mol}^{-1}$ ) for the corresponding species plus  $\text{HPPh}_2 + 2\text{RCOOH}$  from N-i to N, and for the corresponding species plus  $2\text{RCOOH}$  from E-i + ROH to N are shown relative to  $\text{Cd}(\text{OA})_2 + 2\text{SePPh}_2\text{H} + \text{ROH}$  at the M06//B3LYP/6-31++G(d, p), SDD level. Red and green lines represent the reaction (S4-1)  $\text{N-i} \rightarrow \text{N}$  and (S4-2)  $\text{E-i} + \text{ROH} \rightarrow \text{N} + \text{HPPh}_2$ , respectively. ....13

**Figure S6.** Rate-determining step for the formation of CdSe monomers. TDI and TDTS denote TOF-determining intermediate and transition state in optimal reaction pathway, respectively. ....15

**Figure S7.** Arrhenius plots of rate constants for the crucial reaction step  $\text{E-i} + \text{HPPh}_2 \rightarrow \text{E-i/G-TS1}$  for the formation of  $\text{Ph}_2\text{P}-\text{CdSe}-\text{PPh}_2$  (G) in the reaction System 1 ( $\text{HY} = \text{HPPh}_2$ ). ....16

**Figure S8.** Arrhenius plots of rate constants for the crucial reaction step  $\text{E} + \text{RSH} \rightarrow \text{E/J-TS1}$  for the formation of  $\text{RS}-\text{CdSe}-\text{PPh}_2$  (J) in the reaction System 2 ( $\text{HY} = \text{RSH} + \text{HPPh}_2$ ). ....17

**Figure S9.** Arrhenius plots of rate constants for the crucial reaction step  $\text{F} + \text{RSH} \rightarrow \text{F/K-TS1}$  for the formation of

|                                                                                                                                                                                                                                                                                                                                                                                                                                                                                                                                                                                                                                                                                                                                                                                                                                                                                                                                                                                                                                                                                                                                                                                                                                                                           |    |
|---------------------------------------------------------------------------------------------------------------------------------------------------------------------------------------------------------------------------------------------------------------------------------------------------------------------------------------------------------------------------------------------------------------------------------------------------------------------------------------------------------------------------------------------------------------------------------------------------------------------------------------------------------------------------------------------------------------------------------------------------------------------------------------------------------------------------------------------------------------------------------------------------------------------------------------------------------------------------------------------------------------------------------------------------------------------------------------------------------------------------------------------------------------------------------------------------------------------------------------------------------------------------|----|
| Ph <sub>2</sub> P–SeCdSe–SR ( <b>K</b> ) in the reaction <b>System 2</b> (HY = RSH + HPPH <sub>2</sub> ).....                                                                                                                                                                                                                                                                                                                                                                                                                                                                                                                                                                                                                                                                                                                                                                                                                                                                                                                                                                                                                                                                                                                                                             | 18 |
| <b>Figure S10.</b> Arrhenius plots of rate constants for the crucial reaction step <b>E</b> + ROH → <b>E/M-TS1</b> for the formation of RO–CdSe–PPh <sub>2</sub> ( <b>M</b> ) in the reaction <b>System 3</b> (HY = ROH + HPPH <sub>2</sub> ).....                                                                                                                                                                                                                                                                                                                                                                                                                                                                                                                                                                                                                                                                                                                                                                                                                                                                                                                                                                                                                        | 19 |
| <b>Figure S11.</b> Arrhenius plots of rate constants for the crucial reaction step <b>E-i</b> + ROH → <b>E-i/N-TS1</b> for the formation of Ph <sub>2</sub> P–SeCdSe–OR ( <b>N</b> ) in the reaction <b>System 3</b> (HY = ROH + HPPH <sub>2</sub> ).....                                                                                                                                                                                                                                                                                                                                                                                                                                                                                                                                                                                                                                                                                                                                                                                                                                                                                                                                                                                                                 | 20 |
| <b>Figure S12.</b> Arrhenius plots of rate constants for the crucial reaction step <b>E</b> + RNH <sub>2</sub> → <b>E/H-TS1</b> for the formation of RHN–CdSe–PPh <sub>2</sub> ( <b>H</b> ) in the reaction <b>System 4</b> (HY = RNH <sub>2</sub> + HPPH <sub>2</sub> ).....                                                                                                                                                                                                                                                                                                                                                                                                                                                                                                                                                                                                                                                                                                                                                                                                                                                                                                                                                                                             | 21 |
| <b>Figure S13.</b> Arrhenius plots of rate constants for the crucial reaction step <b>E-i</b> + RNH <sub>2</sub> → <b>E-i/I-TS1</b> for the formation of Ph <sub>2</sub> P–SeCdSe–NHR ( <b>I</b> ) in the reaction <b>System 4</b> (HY = RNH <sub>2</sub> + HPPH <sub>2</sub> ).....                                                                                                                                                                                                                                                                                                                                                                                                                                                                                                                                                                                                                                                                                                                                                                                                                                                                                                                                                                                      | 22 |
| <b>Table S1.</b> The Natural Bond Orbital (NBO, <i>e</i> ) charges of the coordinated atom ( <i>X</i> = Se, P, N, S, and O) in ligands (HY = SePPh <sub>2</sub> H, HPPH <sub>2</sub> , RNH <sub>2</sub> , RSH, and ROH) and stabilization energies (kJ mol <sup>-1</sup> ) of coordination complex (HY)Cd(OA) <sub>2</sub> and (HY) <sub>2</sub> Cd(OA) <sub>2</sub> .....                                                                                                                                                                                                                                                                                                                                                                                                                                                                                                                                                                                                                                                                                                                                                                                                                                                                                                | 23 |
| <b>Table S2.</b> Relative Gibbs Free Energies and Typical Data for the Reaction of Cd(OA) <sub>2</sub> + HY → RCOOCd–Y + RCOOH <sup>a,b</sup> .....                                                                                                                                                                                                                                                                                                                                                                                                                                                                                                                                                                                                                                                                                                                                                                                                                                                                                                                                                                                                                                                                                                                       | 24 |
| <b>Table S3.</b> Activation strain analysis of transition state (kJ mol <sup>-1</sup> ) and typical lengths (Å) for the Z–H (Z = P, N, S and O) bond cleavage in reaction of Cd(OA) <sub>2</sub> with ligand (HY = SePPh <sub>2</sub> H, HPPH <sub>2</sub> , RNH <sub>2</sub> , RSH, and ROH).....                                                                                                                                                                                                                                                                                                                                                                                                                                                                                                                                                                                                                                                                                                                                                                                                                                                                                                                                                                        | 25 |
| <b>Table S4.</b> Relative Gibbs free energies ( <i>G<sub>r</sub></i> , kJ mol <sup>-1</sup> ), energy height of the highest point (EHHP, kJ mol <sup>-1</sup> ), and highest energy barrier (HEB, kJ mol <sup>-1</sup> ) in the reaction (4) of Ph <sub>2</sub> P–SeCd–Y + SePPh <sub>2</sub> H ⇌ Ph <sub>2</sub> P–SeCdSe–Y + HPPH <sub>2</sub> calculated at the M06//B3LYP/6-31++G(d, p), SDD level in 1-octadecene under room temperature (298.15 K) and atmospheric pressure (1 atm). Y = –PPh <sub>2</sub> , –SR, –OR, –NHR.....                                                                                                                                                                                                                                                                                                                                                                                                                                                                                                                                                                                                                                                                                                                                    | 26 |
| <b>Table S5.</b> Relative Gibbs free energies (Δ <i>G</i> , kJ mol <sup>-1</sup> ) to <b>1</b> (Ph <sub>2</sub> P–Y) + Se=PPh <sub>2</sub> H for all the species in the reaction of Ph <sub>2</sub> P–Y ( <b>1</b> ) + SePPh <sub>2</sub> H ⇌ Ph <sub>2</sub> P(Se)–Y ( <b>2</b> ) + HPPH <sub>2</sub> calculated at the M06//B3LYP/6-31++G(d, p), SDD level in 1-octadecene under room temperature (298.15 K) and atmospheric pressure (1 atm). Y = –OOCR ( <b>a</b> ), –PPh <sub>2</sub> ( <b>b</b> ), –NHR ( <b>c</b> ), –SR ( <b>d</b> ), and –OR ( <b>e</b> ).....                                                                                                                                                                                                                                                                                                                                                                                                                                                                                                                                                                                                                                                                                                   | 27 |
| <b>Table S6.</b> Apparent activation energy (AAE, kJ mol <sup>-1</sup> ), rate-determining step involved bond cleavage, and comparison of correlation parameters for the formation of P-containing compounds Ph <sub>2</sub> P–Y ( <b>1</b> ) and Ph <sub>2</sub> P(Se)–Y ( <b>2</b> ). Y = –OOCR ( <b>a</b> ), –PPh <sub>2</sub> ( <b>b</b> ), –NHR ( <b>c</b> ), –SR ( <b>d</b> ), and –OR ( <b>e</b> ).....                                                                                                                                                                                                                                                                                                                                                                                                                                                                                                                                                                                                                                                                                                                                                                                                                                                            | 28 |
| <b>Table S7.</b> Activation strain analysis of transition state (kJ mol <sup>-1</sup> ) and typical lengths (Å) for the Se–P Bond cleavage in reaction of Ph <sub>2</sub> P–CdSe <sub>2</sub> PPh <sub>2</sub> ( <b>E-i</b> ) or RCOOCdSe <sub>2</sub> PPh <sub>2</sub> ( <b>F</b> ) with ligands (HY = HPPH <sub>2</sub> , RNH <sub>2</sub> , RSH, and ROH).....                                                                                                                                                                                                                                                                                                                                                                                                                                                                                                                                                                                                                                                                                                                                                                                                                                                                                                         | 29 |
| <b>Table S8.</b> The zero-point energies ( <i>ZPE</i> , hartree), thermal correction to Gibbs free energy ( <i>G</i> <sub>0</sub> , hartree) of various species calculated at the B3LYP/6-31++G(d, p), SDD level in the gas phase under atmospheric pressure and room temperature (298.15 K and 1 atm). Polarizable continuum model correction energies ( <i>PCM-E</i> , hartree), total energies ( <i>E<sub>c</sub></i> , hartree) corrected by <i>ZPE</i> , sum of electronic and thermal free energies ( <i>G<sub>c</sub></i> , hartree) corrected by <i>G</i> <sub>0</sub> , relative energies ( <i>E<sub>r</sub></i> , kJ mol <sup>-1</sup> ) and relative Gibbs free energies ( <i>G<sub>r</sub></i> , kJ mol <sup>-1</sup> ) to Cd(OA) <sub>2</sub> + <i>n</i> HY (HY = RSH and ROH; <i>n</i> = 1 ~ 2) for all the species in the reaction of Cd(OA) <sub>2</sub> + <i>n</i> HY → (HY) <sub><i>n</i></sub> Cd(OA) <sub>2</sub> , Cd(OA) <sub>2</sub> + RSH → <b>C4</b> + RCOOH, and Cd(OA) <sub>2</sub> + ROH → <b>C5</b> + RCOOH calculated at the M06//B3LYP/6-31++G(d, p), SDD level in 1-octadecene solution under room temperature and atmospheric pressure (298.15 K and 1 atm).....                                                                         | 30 |
| <b>Table S9.</b> The zero-point energies ( <i>ZPE</i> , hartree), thermal correction to Gibbs free energy ( <i>G</i> <sub>0</sub> , hartree) of various species calculated at the B3LYP/6-31++G(d, p), SDD level in the gas phase under atmospheric pressure and room temperature (298.15 K and 1 atm). Polarizable continuum model correction energies ( <i>PCM-E</i> , hartree), total energies ( <i>E<sub>c</sub></i> , hartree) corrected by <i>ZPE</i> , sum of electronic and thermal free energies ( <i>G<sub>c</sub></i> , hartree) corrected by <i>G</i> <sub>0</sub> , relative energies ( <i>E<sub>r</sub></i> , kJ mol <sup>-1</sup> ) and relative Gibbs free energies ( <i>G<sub>r</sub></i> , kJ mol <sup>-1</sup> ) to Cd(OA) <sub>2</sub> + SePPh <sub>2</sub> H + RSH for all the species in the reaction of Cd(OA) <sub>2</sub> + SePPh <sub>2</sub> H + RSH → <b>J</b> + 2RCOOH ( <b>C</b> + RSH → <b>J</b> + RCOOH, <b>E</b> + RSH → <b>J</b> + SePPh <sub>2</sub> H, <b>F</b> + RSH + HPPH <sub>2</sub> → <b>J</b> + RCOOH + SePPh <sub>2</sub> H, and <b>G</b> + RSH → <b>J</b> + HPPH <sub>2</sub> ) calculated at the M06//B3LYP/6-31++G(d, p), SDD level in 1-octadecene solution under room temperature and atmospheric pressure (298.15 K and |    |

|                                                                                                                                                                                                                                                                                                                                                                                                                                                                                                                                                                                                                                                                                                                                                                                                                                                                                                                                                                                                                                                                                                                                                                                                                                                                                              |    |
|----------------------------------------------------------------------------------------------------------------------------------------------------------------------------------------------------------------------------------------------------------------------------------------------------------------------------------------------------------------------------------------------------------------------------------------------------------------------------------------------------------------------------------------------------------------------------------------------------------------------------------------------------------------------------------------------------------------------------------------------------------------------------------------------------------------------------------------------------------------------------------------------------------------------------------------------------------------------------------------------------------------------------------------------------------------------------------------------------------------------------------------------------------------------------------------------------------------------------------------------------------------------------------------------|----|
| 1 atm).....                                                                                                                                                                                                                                                                                                                                                                                                                                                                                                                                                                                                                                                                                                                                                                                                                                                                                                                                                                                                                                                                                                                                                                                                                                                                                  | 31 |
| <b>Table S10.</b> The zero-point energies ( <i>ZPE</i> , hartree), thermal correction to Gibbs free energy ( <i>G</i> <sub>0</sub> , hartree) of various species calculated at the B3LYP/6-31++G(d, p), SDD level in the gas phase under atmospheric pressure and room temperature (298.15 K and 1 atm). Polarizable continuum model correction energies ( <i>PCM-E</i> , hartree), total energies ( <i>E</i> <sub>c</sub> , hartree) corrected by <i>ZPE</i> , sum of electronic and thermal free energies ( <i>G</i> <sub>c</sub> , hartree) corrected by <i>G</i> <sub>0</sub> , relative energies ( <i>E</i> <sub>r</sub> , kJ mol <sup>-1</sup> ) and relative Gibbs free energies ( <i>G</i> <sub>r</sub> , kJ mol <sup>-1</sup> ) to Cd(OA) <sub>2</sub> + 2SePPh <sub>2</sub> H + RSH for all the species in the reaction of Cd(OA) <sub>2</sub> + 2SePPh <sub>2</sub> H + RSH → <b>K</b> + HPPPh <sub>2</sub> + 2RCOOH ( <b>F</b> + RSH + SePPh <sub>2</sub> H → <b>K</b> + RCOOH, <b>K-i</b> → <b>K</b> , and <b>E-i</b> + RSH → <b>K</b> + HPPPh <sub>2</sub> ) calculated at the M06//B3LYP/6-31++G(d, p), SDD level in 1-octadecene solution under room temperature and atmospheric pressure (298.15 K and 1 atm).....                                                          | 33 |
| <b>Table S11.</b> The zero-point energies ( <i>ZPE</i> , hartree), thermal correction to Gibbs free energy ( <i>G</i> <sub>0</sub> , hartree) of various species calculated at the B3LYP/6-31++G(d, p), SDD level in the gas phase under atmospheric pressure and room temperature (298.15 K and 1 atm). Polarizable continuum model correction energies ( <i>PCM-E</i> , hartree), total energies ( <i>E</i> <sub>c</sub> , hartree) corrected by <i>ZPE</i> , sum of electronic and thermal free energies ( <i>G</i> <sub>c</sub> , hartree) corrected by <i>G</i> <sub>0</sub> , relative energies ( <i>E</i> <sub>r</sub> , kJ mol <sup>-1</sup> ) and relative Gibbs free energies ( <i>G</i> <sub>r</sub> , kJ mol <sup>-1</sup> ) to Cd(OA) <sub>2</sub> + SePPh <sub>2</sub> H + ROH for all the species in the reaction of Cd(OA) <sub>2</sub> + SePPh <sub>2</sub> H + ROH → <b>M</b> + 2RCOOH ( <b>C</b> + ROH → <b>M</b> + RCOOH, <b>E</b> + ROH → <b>M</b> + SePPh <sub>2</sub> H, <b>F</b> + ROH + HPPPh <sub>2</sub> → <b>M</b> + RCOOH + SePPh <sub>2</sub> H, and <b>G</b> + ROH → <b>M</b> + HPPPh <sub>2</sub> ) calculated at the M06//B3LYP/6-31++G(d, p), SDD level in 1-octadecene solution under room temperature and atmospheric pressure (298.15 K and 1 atm)..... | 34 |
| <b>Table S12.</b> The zero-point energies ( <i>ZPE</i> , hartree), thermal correction to Gibbs free energy ( <i>G</i> <sub>0</sub> , hartree) of various species calculated at the B3LYP/6-31++G(d, p), SDD level in the gas phase under atmospheric pressure and room temperature (298.15 K and 1 atm). Polarizable continuum model correction energies ( <i>PCM-E</i> , hartree), total energies ( <i>E</i> <sub>c</sub> , hartree) corrected by <i>ZPE</i> , sum of electronic and thermal free energies ( <i>G</i> <sub>c</sub> , hartree) corrected by <i>G</i> <sub>0</sub> , relative energies ( <i>E</i> <sub>r</sub> , kJ mol <sup>-1</sup> ) and relative Gibbs free energies ( <i>G</i> <sub>r</sub> , kJ mol <sup>-1</sup> ) to Cd(OA) <sub>2</sub> + 2SePPh <sub>2</sub> H + ROH for all the species in the reaction of Cd(OA) <sub>2</sub> + 2SePPh <sub>2</sub> H + ROH → <b>N</b> + HPPPh <sub>2</sub> + 2RCOOH ( <b>N-i</b> → <b>N</b> and <b>E-i</b> + ROH → <b>N</b> + HPPPh <sub>2</sub> ) calculated at the M06//B3LYP/6-31++G(d, p), SDD level in 1-octadecene solution under room temperature and atmospheric pressure (298.15 K and 1 atm). .....                                                                                                                    | 36 |
| <b>Table S13.</b> Selected bond lengths (in Å), bond angles (in degree), the number of basis functions, and the number of primitive Gaussians of RCOOCdSe–PPh <sub>2</sub> species optimized using B3LYP or BPW91 functionals with SDD, cc-pVDZ-pp, or cc-pVTZ-pp basis sets. ....                                                                                                                                                                                                                                                                                                                                                                                                                                                                                                                                                                                                                                                                                                                                                                                                                                                                                                                                                                                                           | 37 |
| <b>Descriptions for the turnover frequency (TOF) of the catalytic cycle and rate constants <i>k</i>(<i>T</i>)</b> .....                                                                                                                                                                                                                                                                                                                                                                                                                                                                                                                                                                                                                                                                                                                                                                                                                                                                                                                                                                                                                                                                                                                                                                      | 38 |
| <b>Snapshot and standard orientation of all the species in the gas phase calculated at the B3LYP/6-31++G(d, p), SDD level. Distance lengths are reported in Å.</b> .....                                                                                                                                                                                                                                                                                                                                                                                                                                                                                                                                                                                                                                                                                                                                                                                                                                                                                                                                                                                                                                                                                                                     | 39 |
| <b>References</b> .....                                                                                                                                                                                                                                                                                                                                                                                                                                                                                                                                                                                                                                                                                                                                                                                                                                                                                                                                                                                                                                                                                                                                                                                                                                                                      | 85 |

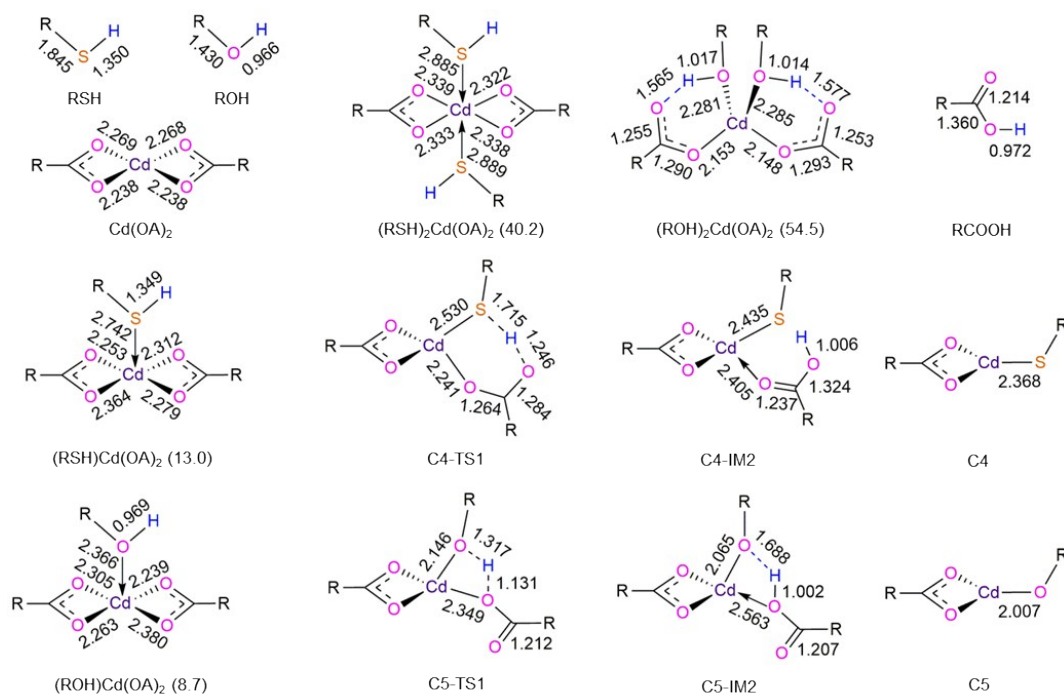

(a)

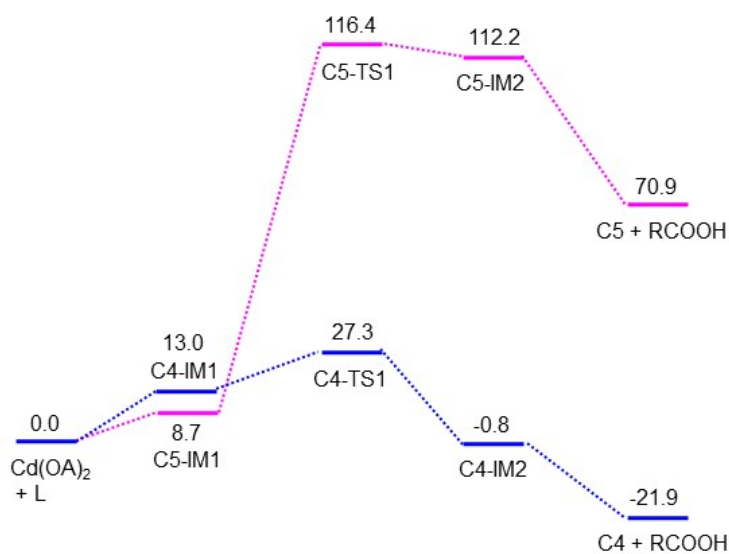

(b)

**Figure S1.** The geometric structures of various species (a), and the schematic energy diagrams (b) for the reaction (3)  $\text{Cd}(\text{OA})_2 + \text{HY} \rightarrow \text{RCOOCd-Y} + \text{RCOOH}$ ,  $\text{Y} = -\text{SR}$  (C4) and  $-\text{OR}$  (C5), respectively. Bond lengths are reported in Å. Relative Gibbs free energies ( $G_r$ ,  $\text{kJ mol}^{-1}$ ) for the corresponding species relative to  $\text{Cd}(\text{OA})_2 + \text{HY}$  ( $\text{HY} = \text{RSH}$  and  $\text{ROH}$ ) at the M06//B3LYP/6-31++G(d, p), SDD level are shown.

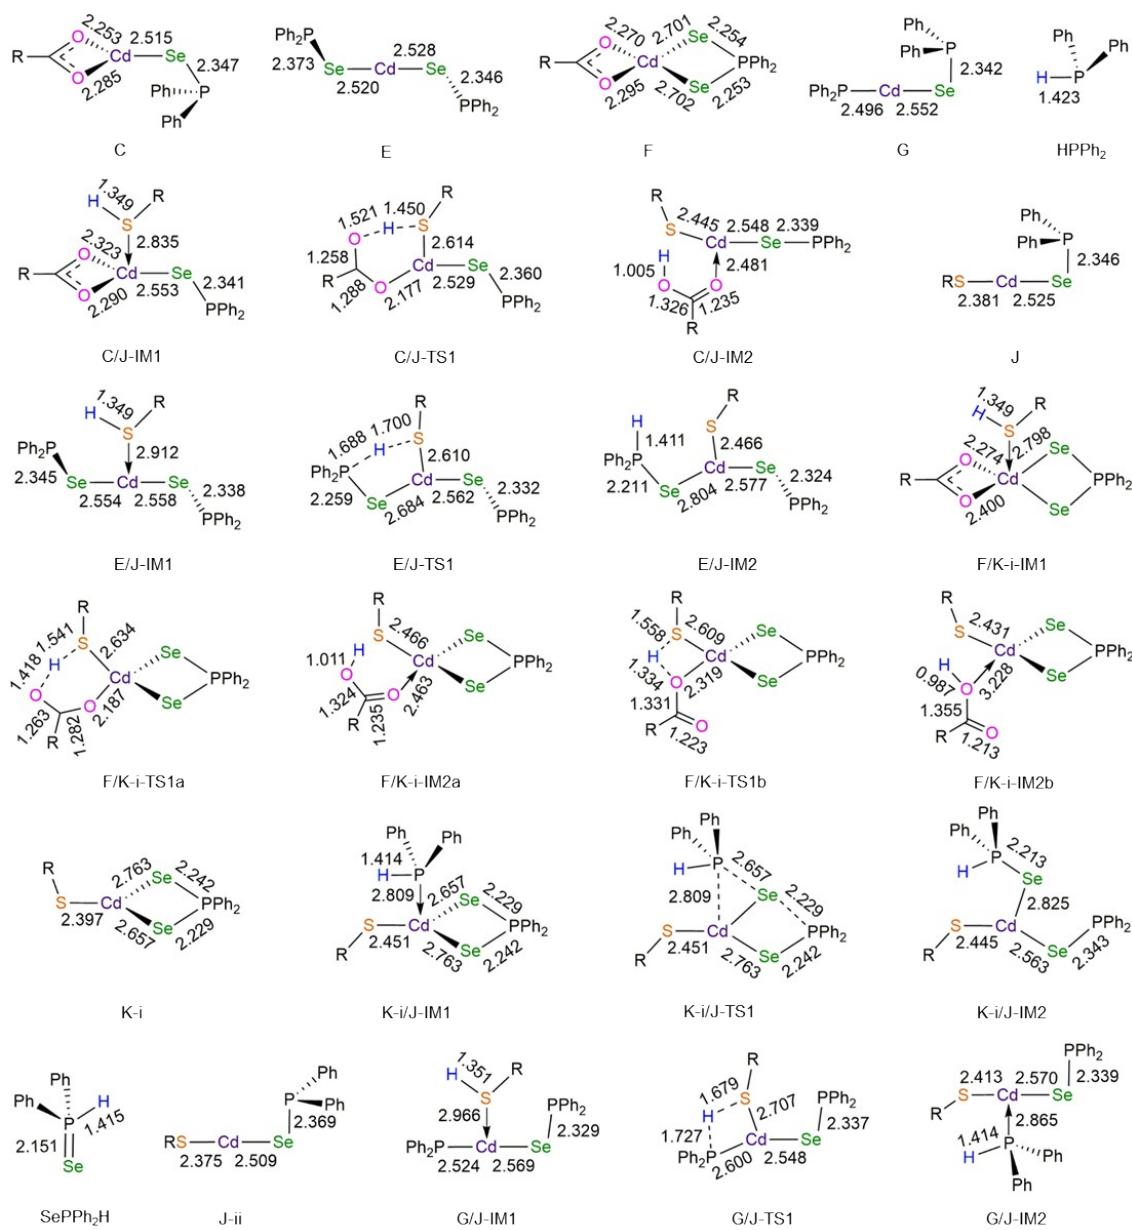

(a)

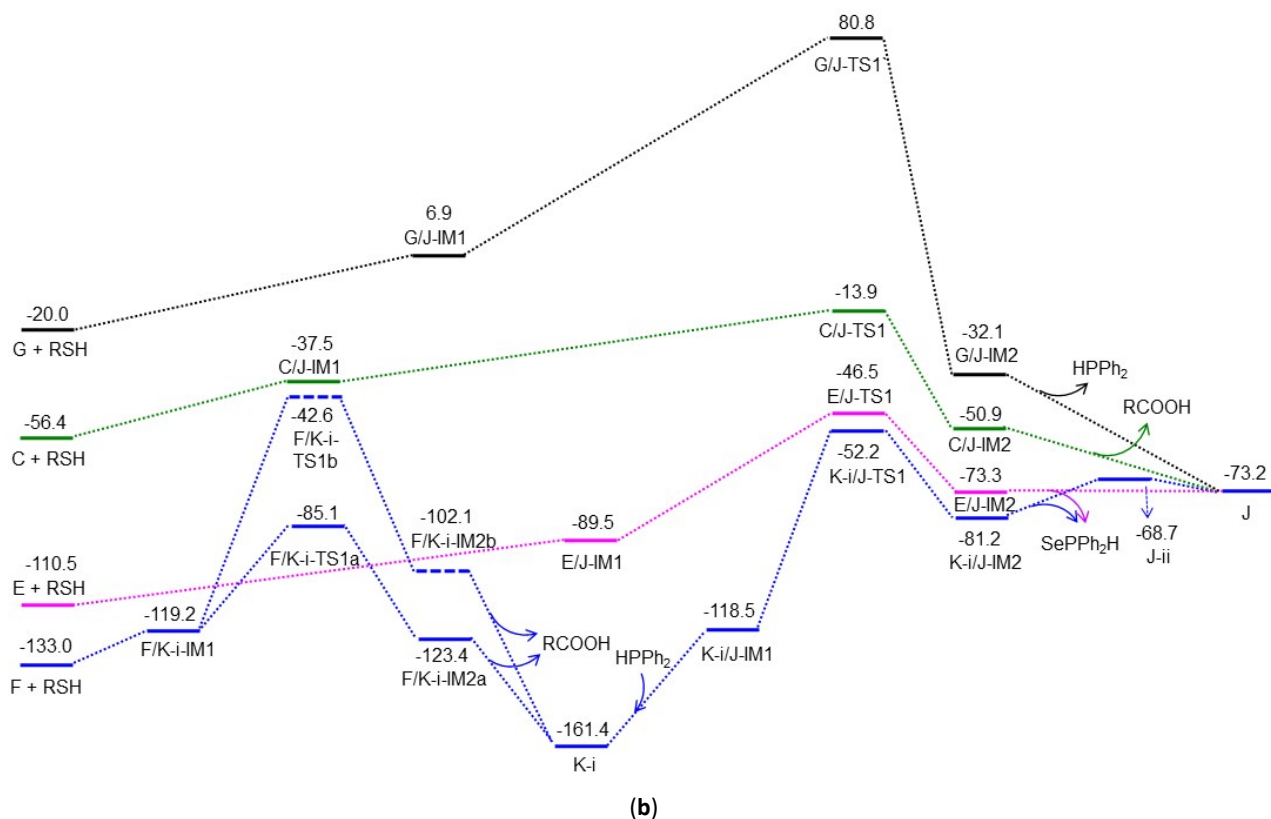

**Figure S2.** The geometric structures of various species (a), and the schematic energy diagrams (b) for the reaction (S1)  $\text{Cd}(\text{OA})_2 + \text{SePPh}_2\text{H} + \text{RSH} \rightarrow \text{RS-CdSe-PPh}_2 (\text{J}) + 2\text{RCOOH}$  calculated at the M06//B3LYP/6-31++G(d, p), SDD level are shown. Bond lengths are reported in Å. Relative Gibbs free energies ( $G_r$ ,  $\text{kJ mol}^{-1}$ ) for the corresponding species plus RCOOH from **C** + RSH to **J**, for the corresponding species plus HPPPh<sub>2</sub> + RCOOH – SePPh<sub>2</sub>H from **F** + RSH to **K-i**, for the corresponding species plus 2RCOOH – SePPh<sub>2</sub>H from **K-i** and **E** to **J**, and for the corresponding species plus 2RCOOH – HPPPh<sub>2</sub> from **G** + RSH to **J** are shown relative to  $\text{Cd}(\text{OA})_2 + \text{SePPh}_2\text{H} + \text{RSH}$ . Green, red, blue, and black lines represent the reaction (S1-1) **C** + RSH  $\rightarrow$  **J** + RCOOH, (S1-2) **E** + RSH  $\rightarrow$  **J** + SePPh<sub>2</sub>H, (S1-3) **F** + RSH + HPPPh<sub>2</sub>  $\rightarrow$  **J** + RCOOH + SePPh<sub>2</sub>H, and (S1-4) **G** + RSH  $\rightarrow$  **J** + HPPPh<sub>2</sub>, respectively.

In the reaction system of HPPPh<sub>2</sub>/RSH additives (**System 2**), the formation of RS–CdSe–PPh<sub>2</sub> (**J**) can be expressed to the overall reaction formula:

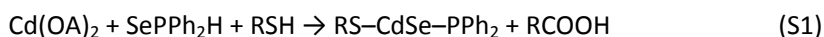

For the **J** monomer formation, the reactions of **C**, **E**, **F**, and **G** with RSH and/or HPPPh<sub>2</sub> can be dealt with the following four reaction formulas:

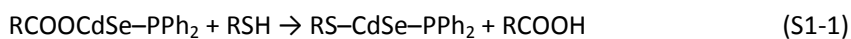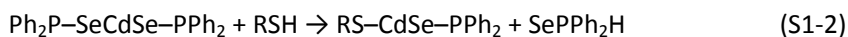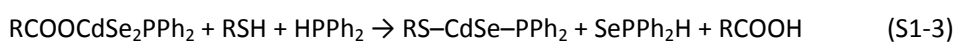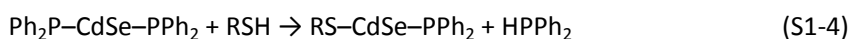

The geometric structures and the schematic energy diagrams for reactions S1-1,2,3,4 are depicted in Figure S2a,b.

As depicted in Figure S2a,b, for the reaction S1-1 of **C** with RSH, in the beginning, when RSH interacts with the central Cd atom of **C**, a four-coordination complex **C/J-IM1** is formed. From **C/J-IM1**, H-shift from RSH to carboxylate occurs via a six-membered ring **C/J-TS1**, leading to a RCOOH molecular complex **C/J-IM2**. Then, **C/J-IM2** releases RCOOH free, leaving RS–CdSe–PPh<sub>2</sub> (**J**) monomer behind. This reaction pathway involves the HEBP of 23.6  $\text{kJ mol}^{-1}$  at the reaction step of **C/J-IM1**  $\rightarrow$  **C/J-TS1**, the EHHP of -13.9  $\text{kJ mol}^{-1}$  at **C/J-TS1**, and the exoergicity of 16.8  $\text{kJ mol}^{-1}$ .

As pictured in Figure S2a,b, for the reaction S1-2 of **E** with RSH, to begin, when RSH interacts with the central Cd atom of **E**, a three-coordination complex **E/J-IM1** is formed. Then, from **E/J-IM1**, H-shift from RSH to  $-PPh_2$  group occurs via a five-membered ring **E/J-TS1**, leading to a  $SePPh_2H$  molecular complex **E/J-IM2**. Next, **E/J-IM2** releases the free  $SePPh_2H$ , leaving **J** monomer behind. This reaction pathway comprises the HEB of  $43.0 \text{ kJ mol}^{-1}$  at the reaction step of **E/J-IM1**  $\rightarrow$  **E/J-TS1**, the EHHP of  $-46.5 \text{ kJ mol}^{-1}$  at **E/J-TS1**, and the endoergicity of  $37.3 \text{ kJ mol}^{-1}$ .

As shown in Figure S2a,b, there are two reaction formulas for the formation **J** from **F**.

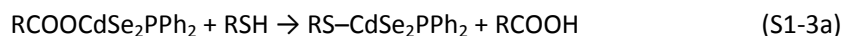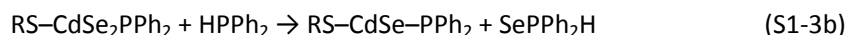

In the beginning, when RSH molecule coordinates to **F**, the five-coordination complex **F/K-i-IM1** is generated. From **F/K-i-IM1**, there are two reaction pathways for the formation of  $RS-CdSe_2PPh_2$  (**K-i**). For one thing, H-shift from RSH to carboxylate proceeds via a six-membered ring **F/K-i-TS1a**, producing a complex **F/K-i-IM2a**, containing  $RCOOH$  molecular. For another, a [1,3]-H shift takes place via a four-membered ring **F/K-i-TS1b**, leading a  $RCOOH$ -containing molecular complex **F/K-i-IM2b**. After that, **F/K-i-IM2a,b** liberate the  $RCOOH$  free, leaving **K-i** with the four-membered ring  $Cd^*-Se-P-Se-(Cd^*)$  skeleton behind. Because the energy of **F/K-i-TS1a** locates  $42.5 \text{ kJ mol}^{-1}$  below **F/K-i-TS1b**, the reaction pathway via **F/K-i-TS1a** is kinetically more favoured than that **F/K-i-TS1b**. This may be attributed to be the fact that the strain of six-membered ring is less than that of four-membered ring. That is to say, the formation of **K-i** should prefer via the six-membered **F/E-i-TS1a** to the four-membered **F/E-i-TS1b**. NBO results show that the occupancies of  $Cd-S$  are  $1.982 e$  in the complex **K-i**, indicating a complete single-bond formed. Furthermore, there is a hyperconjugation interaction in  $Cd^*-Se-P-Se-(Cd^*)$  four-membered cycle. It is indicated that the stable complex **K-i** includes three-coordinated Cd center. That is to say, when RSH coordinates to four-coordinated **F**, a more stable three-coordinated complex **K-i** can be formed by releasing  $RCOOH$  free. This decrease of coordination number originates from the formation of  $Cd-S$  single bond.

Next, in the reaction S1-3b, **K-i** interacts with  $HPPH_2$  molecule though the P-end, producing a four-coordination complex **K-i/J-IM1**. From **K-i/J-IM1**, the  $Se-P$  bond cleavage of  $-Se_2PR_2$  group occurs via a five-membered ring **K-i/J-TS1**, through the electrophilic attack of  $HPPH_2$  toward Se atom, generating a  $SePPh_2H$ -containing molecular complex **K-i/J-IM2**. Then, **K-i/J-IM2** sets the  $SePPh_2H$  molecule free, leaving *trans*- $RS-CdSe-PPh_2$  (**J-ii**). Lastly, **J-ii** can readily isomerize to **J**.

As for the reaction S1-3, the minimal energy reaction pathway (MERP) should include the EHHP of  $-52.2 \text{ kJ mol}^{-1}$  at **K-i/J-TS1**, the HEB of  $66.3 \text{ kJ mol}^{-1}$  at the reaction step **K-i/J-IM1**  $\rightarrow$  **K-i/J-TS1**, and the endoergicity of  $59.8 \text{ kJ mol}^{-1}$ .

As depicted in Figure S2a,b, for the reaction S1-4 of **G** with RSH, initially, when the S-end of RSH interacts with the central Cd atom of **G**, a three-coordination complex **G/J-IM1** is generated. Next, from **G/J-IM1**, H-shift from RSH to  $-PPh_2$  group takes place via a four-membered ring **G/J-TS1**, resulting in a  $HPPH_2$  molecular complex **G/J-IM2**. Lastly, **G/J-IM2** releases the free  $HPPH_2$ , leaving **J** behind. This reaction pathway comprises the HEB of  $73.9 \text{ kJ mol}^{-1}$  at the reaction step of **G/J-IM1**  $\rightarrow$  **G/J-TS1**, the EHHP of  $80.8 \text{ kJ mol}^{-1}$  at **G/J-TS1**, and the exoergicity of  $53.2 \text{ kJ mol}^{-1}$ .



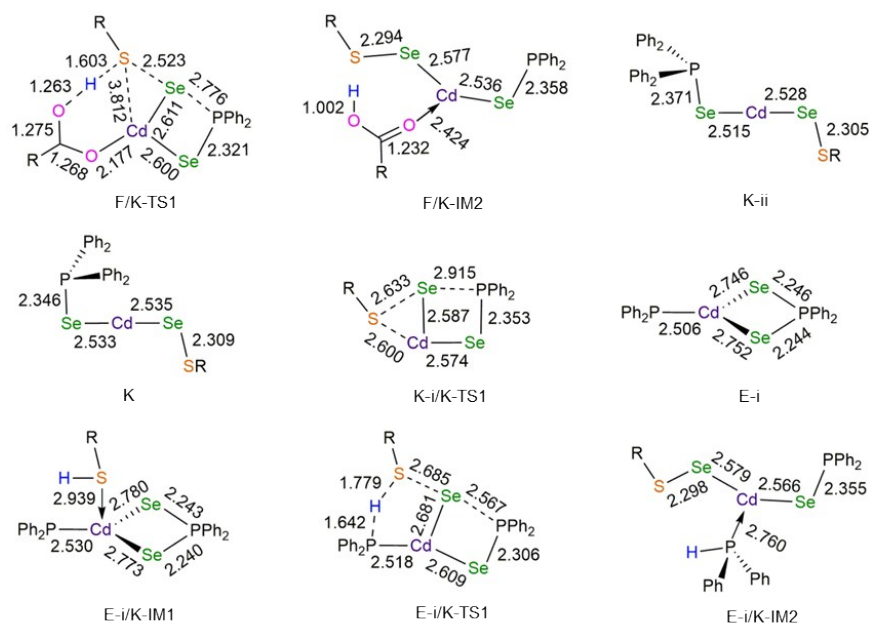

(a)

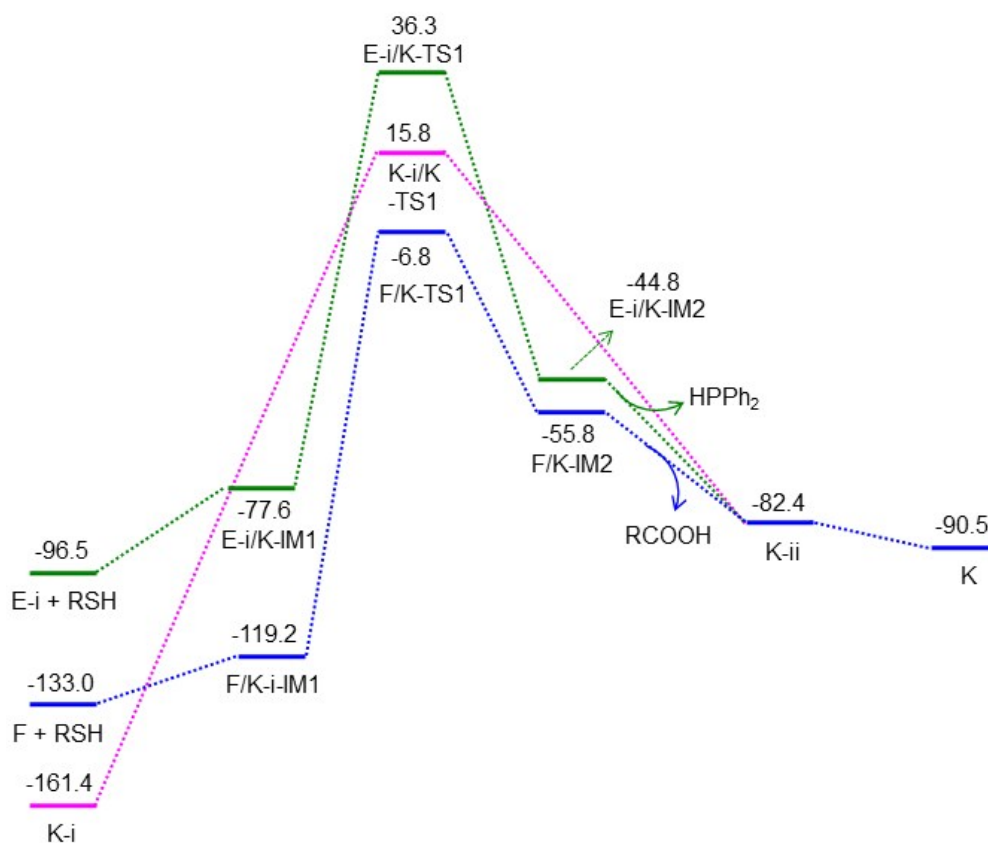

(b)

**Figure S3.** The geometric structures of various species (a), and the schematic energy diagrams (b) for the reaction (S2)  $\text{Cd}(\text{OA})_2 + 2\text{SePPh}_2\text{H} + \text{RSH} \rightarrow \text{Ph}_2\text{P}-\text{SeCdSe}-\text{SR} (\text{K}) + \text{HPPH}_2 + 2\text{RCOOH}$  calculated at the M06//B3LYP/6-31++G(d, p), SDD level are shown. Bond lengths are reported in Å. Relative Gibbs free energies ( $G_r$ ,  $\text{kJ mol}^{-1}$ ) for the corresponding species plus  $\text{HPPH}_2 + \text{RCOOH}$  from  $\text{F} + \text{RSH}$  to  $\text{K}$ , for the corresponding species plus  $\text{HPPH}_2 + 2\text{RCOOH}$  from  $\text{K-i}$  to  $\text{K}$ , and for the corresponding species plus  $2\text{RCOOH}$  from  $\text{E-i} + \text{RSH}$  to  $\text{K}$  are shown relative to  $\text{Cd}(\text{OA})_2 + 2\text{SePPh}_2\text{H} + \text{RSH}$ . Blue, red, and green lines represent the reaction (S2-1)  $\text{F} + \text{RSH} \rightarrow \text{K} + \text{RCOOH}$ , (S2-2)  $\text{K-i} \rightarrow \text{K}$ , and (S2-3)  $\text{E-i} + \text{RSH} \rightarrow \text{K} + \text{HPPH}_2$ , respectively.

In the reaction system of HPPH<sub>2</sub>/RSH additives (**System 2**), the formation of Ph<sub>2</sub>PSe–CdSe–SR (**K**) can be showed to the overall reaction formula:

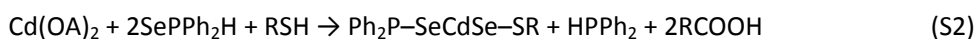

For the **K** monomer formation, the reactions of RCOOCdSe<sub>2</sub>PPh<sub>2</sub> (**F**), RS–CdSe<sub>2</sub>PPh<sub>2</sub> (**K-i**), and Ph<sub>2</sub>P–CdSe<sub>2</sub>PPh<sub>2</sub> (**E-i**) with RSH can be referred to the following three reactions:

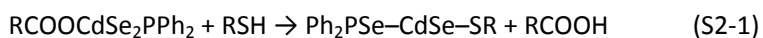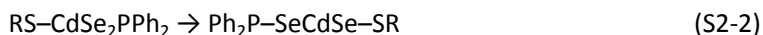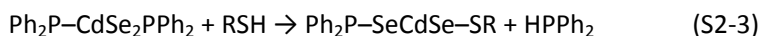

The geometric structures and the schematic energy diagrams for reactions S2-1,2,3 are depicted in Figure S3a,b.

As shown in Figure S3a,b, for the reaction S2-1 of RCOOCdSe<sub>2</sub>PPh<sub>2</sub> (**F**) with RSH, first of all, from five-coordination complex **F/K-i-IM1**, [1,5]-H shift in a six-membered cycle and Se exchange through the Se–P bond cleavage of Se<sub>2</sub>PPh<sub>2</sub> moiety and Se–S bond formation take place simultaneously via a nine-membered **F/K-TS1**, resulting to a RCOOH-containing complex **F/K-IM2**. Next, **F/K-IM2** decomposes into the discrete *trans*-Ph<sub>2</sub>PSe–CdSe–SR (**K-ii**) and RCOOH. Last, **K-ii** can readily isomerize to **K**, with the Se–P single bond rotation. Combined with the formation of **C** and **F** in reaction **System 1**,<sup>1</sup> the reaction pathway of **K** from **C** is signified as **RP-CFK** (see Scheme 2b), which includes the HEB of 112.4 kJ mol<sup>-1</sup> at the reaction step of **F/K-i-IM1** → **F/K-TS1**, the EHHP of –6.8 kJ mol<sup>-1</sup> at **F/K-TS1**.

As pictured in Figure S3a,b, the reaction S2-2 is the isomerization of RS–Cd–Se<sub>2</sub>PPh<sub>2</sub> (**K-i**). From **K-i**, Se exchange occurs through the synchronous Se–P bond cleavage of Se<sub>2</sub>PPh<sub>2</sub>H moiety, Cd–S bond cleavage, and Se–S bond formation via a five-membered envelope-like **K-i/K-TS1**, producing an isomer **K-ii**. Last, **K-ii** can isomerize to **K**. Integrated with the formation of **C** and **F** in reaction **System 1**,<sup>1</sup> the reaction pathway of **K** from **C** via **K-i** is expressed as **RP-CFK-iK** (see Scheme 2b), which contains the HEB of 177.2 kJ mol<sup>-1</sup> at the reaction step of **K-i** → **K-i/K-TS1**, the EHHP of 15.8 kJ mol<sup>-1</sup> at **K-i/K-TS1**.

As depicted in Figure S3a,b, for the reaction S2-3 of Ph<sub>2</sub>P–CdSe<sub>2</sub>PPh<sub>2</sub> (**E-i**) with RSH, in the beginning, a four-coordination complex **E-i/K-IM1** is formed by coordinating RSH and the central Cd atom of **E-i**. Then, from **E-i/K-IM1**, [1,4]-H shift and Se exchange through the Se–P bond cleavage of Se<sub>2</sub>PPh<sub>2</sub> moiety and Se–S bond formation occur simultaneously via a seven-membered twist-chair-like **E-i/K-TS1**, leading to a complex **E-i/K-IM2**, containing a HPPH<sub>2</sub> molecular. After that, **E-i/K-IM2** liberates the free HPPH<sub>2</sub>, leaving the **K-ii** monomer behind. Finally, **K-ii** can readily isomerize to **K**. Together with the formation of **C**, **F**, and **E-i** in reaction **System 1**,<sup>1</sup> the reaction pathway of **K** formation from **C** via **E-i** is denoted as **RP-CFE-iK** (see Scheme 2b), which comprises the HEB of 113.9 kJ mol<sup>-1</sup> at the reaction step of **E-i/K-IM1** → **E-i/K-TS1**, the EHHP of 36.3 kJ mol<sup>-1</sup> at **E-i/K-TS1**.

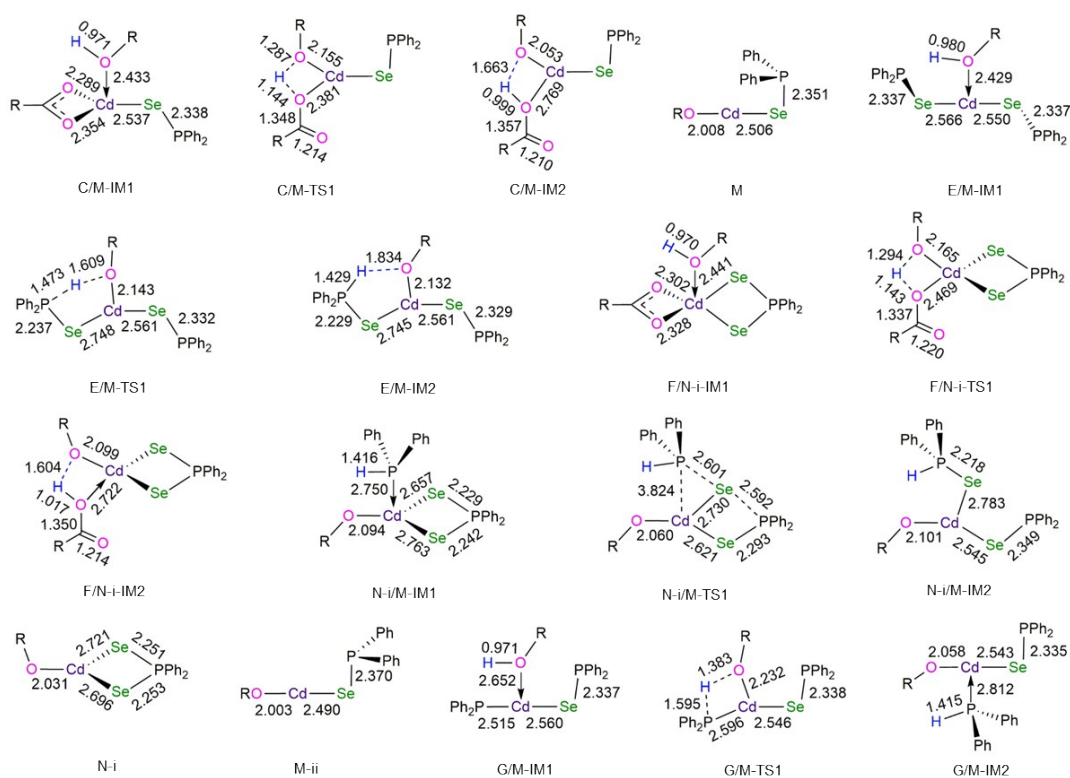

(a)

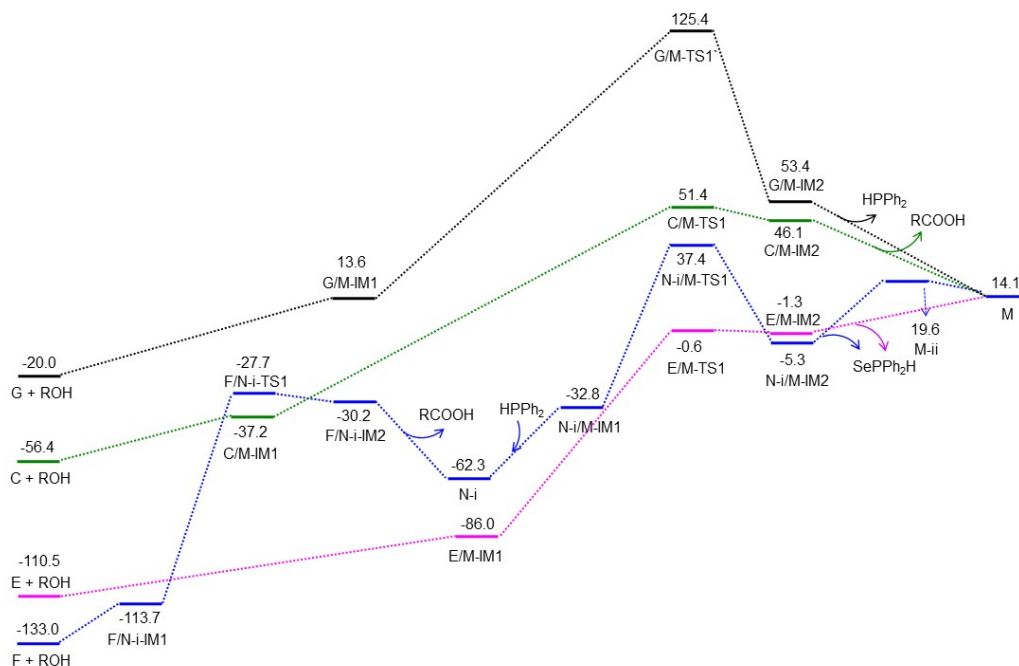

(b)

**Figure S4.** The geometric structures of various species (a), and the schematic energy diagrams (b) for the reaction (S3)  $\text{Cd}(\text{OAc})_2 + \text{SePPh}_2\text{H} + \text{ROH} \rightarrow \text{RO}-\text{CdSe}-\text{PPh}_2$  (**M**) +  $2\text{RCOOH}$  calculated at the M06//B3LYP/6-31++G(d, p), SDD level are shown. Bond lengths are reported in Å. Relative Gibbs free energies ( $G$ ,  $\text{kJ mol}^{-1}$ ) for the corresponding species plus RCOOH from **C** + ROH to **M**, for the corresponding species plus  $\text{HPPh}_2 + \text{RCOOH} - \text{SePPh}_2\text{H}$  from **F** + ROH to **N-i**, for the corresponding species plus  $2\text{RCOOH} - \text{SePPh}_2\text{H}$  from **N-i** +  $\text{HPPh}_2$  and **E** + ROH to **M**, and for the corresponding species plus  $2\text{RCOOH} - \text{HPPh}_2$  from **G** + ROH to **M** are shown relative to  $\text{Cd}(\text{OAc})_2 + \text{SePPh}_2\text{H} + \text{ROH}$ . Green, red, blue, and black lines represent the reaction (S3-1) **C** + ROH  $\rightarrow$  **M** + RCOOH, (S3-2) **E** + ROH  $\rightarrow$  **M** +  $\text{SePPh}_2\text{H}$ , (S3-3) **F** + ROH +  $\text{HPPh}_2 \rightarrow$  **M** + RCOOH +  $\text{SePPh}_2\text{H}$ , and (S3-4) **G** + ROH  $\rightarrow$  **M** +  $\text{HPPh}_2$ , respectively.

In the reaction system of HPPH<sub>2</sub>/ROH additives (**System 3**), the formation of RO–CdSe–PPh<sub>2</sub> (**M**) can be represented to the overall reaction formula:

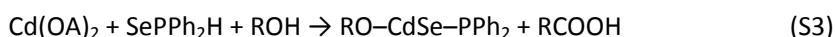

For the M monomer formation, the reactions of **C**, **E**, **F**, and **G** with ROH and/or HPPH<sub>2</sub> can be referred to by the following four reaction formulas:

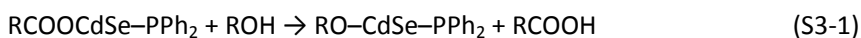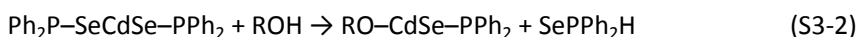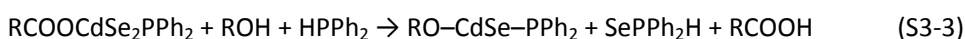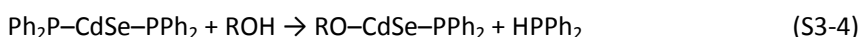

Supplementary Figure 4a,b presents the geometric structures and schematic energy diagrams of reactions S3-1,2,3,4 in the reaction **System 3**. As pictured in Figure S4a,b, for the reaction S3-1 of **C** with ROH, initially, ROH interacts with the central Cd atom of **C**, producing a four-coordination complex **C/M-IM1**. Then, a [1,3]-H shift occurs via a four-membered ring **C/M-TS1**, generating a RCOOH-containing molecular complex **C/M-IM2**. Lastly, **C/M-IM2** sets the RCOOH free, leaving RO–CdSe–PPh<sub>2</sub> (**M**) behind. For **M**, NBO results show that the occupancies of Cd–Se are 1.983 *e*, indicating a complete single-bond in Cd–Se. In addition, there is a very strong hyperconjugation interaction in P–Se–Cd–O skeleton. This reaction pathway denoted as **RP-CM** (see Scheme 2c) includes the EHHP of 51.4 kJ mol<sup>-1</sup> at **C/M-TS1**, the HEB of 88.6 kJ mol<sup>-1</sup> at the reaction step of **C/M-IM1** → **C/M-TS1**, and the endoergicity of 70.5 kJ mol<sup>-1</sup>.

As depicted in Figure S4a,b, for the reaction S3-2 of **E** with ROH, in the beginning, when the O-end of ROH interacts with the central Cd atom of **E**, a three-coordination complex **E/M-IM1** is formed. Then, from **E/M-IM1**, a [1,4]-H shift from ROH to –PPh<sub>2</sub> group takes place via a five-membered ring **E/M-TS1**, forming to a SePPh<sub>2</sub>H molecular complex **E/M-IM2**. Next, **E/M-IM2** decomposes into the discrete **M** monomer and SePPh<sub>2</sub>H. Combined with the formation of **C** and **E** in reaction **System 1**,<sup>1</sup> the reaction pathway of **M** formation from **C** via **E** is remarked as **RP-CEM** (see Scheme 2c), which comprises the EHHP of –0.6 kJ mol<sup>-1</sup> at **E/M-TS1** and the HEB of 85.4 kJ mol<sup>-1</sup> at the reaction step of **E/M-IM1** → **E/M-TS1**.

As shown in Figure S4a,b, there are two reaction formulas for the formation **M** from **F**,

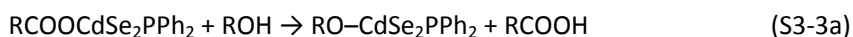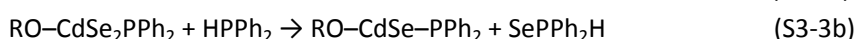

To begin, a five-coordination complex **F/N-i-IM1** is generated by coordinating ROH to **F**. A [1,3]-H shift from ROH to carboxylate occurs via a four-membered ring **F/N-i-TS1**, producing a RCOOH molecular complex **F/N-i-IM2**. After that, **F/N-i-IM2** liberates the RCOOH, leaving **N-i** behind. For the complex **N-i**, NBO results show that there is a very strong hyperconjugation interaction in four-membered O–Cd\*–Se–P–Se–(Cd)\* skeleton. Next, in the reaction S3-2b, when the P-end of HPPH<sub>2</sub> molecule interacts with **N-i**, a four-coordination complex **N-i/M-IM1** is formed. From **N-i/M-IM1**, Se–P bond cleavage takes place via a five-membered ring **N-i/M-TS1**, yielding a SePPh<sub>2</sub>H-containing **N-i/M-IM2** molecular complex. Next, **N-i/M-IM2** separates into the discrete *trans*-RO–CdSe–PPh<sub>2</sub> (**M-ii**) and SePPh<sub>2</sub>H molecule. Finally, **M-ii** can readily isomerize to **M**. Together with the formation of **C** and **F** in reaction **System 1**,<sup>1</sup> the reaction pathway of **M** formation from **C** via **N-i** is signified as **RP-CFN-iM** (see Scheme 2c), which comprises the EHHP of 37.4 kJ mol<sup>-1</sup> at **N-i/M-TS1** and the HEB of 70.2 kJ mol<sup>-1</sup> at the reaction step of **N-i/M-IM1** → **N-i/M-TS1**.

As depicted in Figure S4a,b, for the reaction S3-4 of **G** with ROH, ROH interacts initially with **G** through coordination, forming a three-coordination complex **G/M-IM1**. Next, a [1,3]-H shift from ROH to –PPh<sub>2</sub> group takes place via a four-membered cyclic **G/M-TS1**, resulting in complex **G/M-IM2** with a HPPH<sub>2</sub> molecular. Finally, **G/M-IM2** releases the free HPPH<sub>2</sub>, leaving **M** behind. Integrated with the formation of **C** and **F** in reaction **System 1**,<sup>1</sup> the reaction pathway of **M** formation from **C** via **E-i** and **G** is expressed as **RP-CFE-iGM** (see Scheme 2c), which contains the EHHP of 111.8 kJ mol<sup>-1</sup> at **G/M-TS1** and the HEB of 125.4 kJ mol<sup>-1</sup> at the reaction step of **G/M-IM1** → **G/M-TS1**.

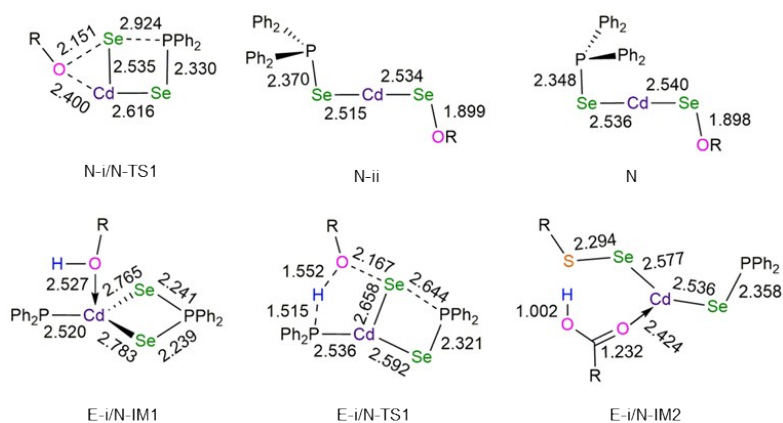

(a)

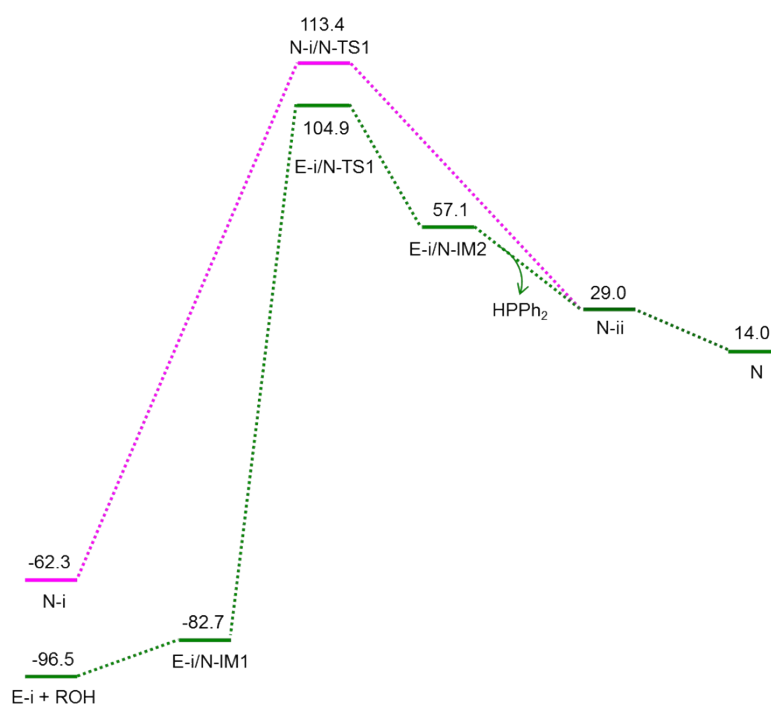

(b)

**Figure S5.** The geometric structures of various species (a), and the schematic energy diagrams (b) for the reaction (S4)  $\text{Cd}(\text{OA})_2 + 2\text{SePPh}_2\text{H} + \text{ROH} \rightarrow \text{Ph}_2\text{P}-\text{SeCdSe}-\text{OR}$  (**N**) +  $\text{HPPh}_2 + 2\text{RCOOH}$  are shown. Bond lengths are reported in Å. Relative Gibbs free energies ( $G_r$ ,  $\text{kJ mol}^{-1}$ ) for the corresponding species plus  $\text{HPPh}_2 + 2\text{RCOOH}$  from **N-i** to **N**, and for the corresponding species plus  $2\text{RCOOH}$  from **E-i** + **ROH** to **N** are shown relative to  $\text{Cd}(\text{OA})_2 + 2\text{SePPh}_2\text{H} + \text{ROH}$  at the M06//B3LYP/6-31++G(d, p), SDD level. Red and green lines represent the reaction (S4-1) **N-i**  $\rightarrow$  **N** and (S4-2) **E-i** + **ROH**  $\rightarrow$  **N** +  $\text{HPPh}_2$ , respectively.

In the reaction system of  $\text{HPPh}_2/\text{ROH}$  additives (**System 3**), the formation of  $\text{Ph}_2\text{PSe}-\text{CdSe}-\text{OR}$  (**N**) can be showed to the overall reaction formula:

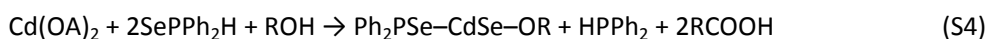

For the **N** monomer formation, the reactions of  $\text{RO}-\text{CdSe}_2\text{PPh}_2$  (**N-i**) and  $\text{Ph}_2\text{P}-\text{CdSe}_2\text{PPh}_2$  (**E-i**) with **ROH** can be formulated upon the following two reactions:

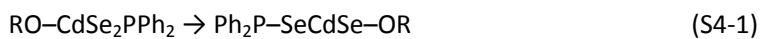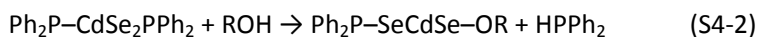

Supplementary Figure S5a,b shows the geometric structures and schematic energy diagrams of reactions S4-1,2. As depicted in Figure S5a,b, the reaction S4-1 is the isomerization of RO–Cd–Se<sub>2</sub>PPh<sub>2</sub> (**N-i**) through the synchronous Se–P and Cd–O bond cleavage, as well as Se–S bond formation via a five-membered envelope-like **N-i/N-TS1**. An isomer *trans*-Ph<sub>2</sub>PSe–CdSe–OR (**N-ii**) is formed. Last, **N-ii** can isomerize to **N** by the rotation of –PPh<sub>2</sub> group. The reaction pathway of **K** from **C** via **N-i** is expressed as **RP-CFN-iN** (see Scheme 2d). This pathway involves the HEB of 175.7 kJ mol<sup>-1</sup> at the reaction step of **N-i** → **N-i/N-TS1**, the EHHP of 113.4 kJ mol<sup>-1</sup> at **N-i/N-TS1**, connecting with the formation of **C** and **F** in reaction **System 1**,<sup>1</sup> and the reaction (5-3a) of **F** + ROH → **N-i** + RCOOH.

As pictured in Figure S5a,b, for the reaction S4-2 of Ph<sub>2</sub>P–CdSe<sub>2</sub>PPh<sub>2</sub> (**E-i**) with ROH, in the beginning, when ROH coordinates to the central Cd atom of **E-i**, a four-coordination complex **E-i/N-IM1** is formed. Then, from **E-i/N-IM1**, Se exchange happens through the simultaneous Se–P bond cleavage of Se<sub>2</sub>PPh<sub>2</sub> moiety, Se–N bond formation, and [1,4]-H shift occurs via a seven-membered twist-chair-like **E-i/N-TS1**, leading to a HPPH<sub>2</sub> molecular complex **E-i/N-IM2**. Next, **E-i/N-IM2** sets HPPH<sub>2</sub> free, leaving the *trans*-Ph<sub>2</sub>PSe–CdSe–OR (**N-ii**) monomer behind. Finally, **N-ii** can readily isomerize to **N**. For the **N** formation from **C** via **E-i**, this reaction pathway **RP-CFE-iN** comprises the HEB of 187.6 kJ mol<sup>-1</sup> at the reaction step of **E-i/N-IM1** → **E-i/N-TS1** and the EHHP of 104.9 kJ mol<sup>-1</sup> at **E-i/N-TS1**, together with the formation of **C**, **F** and **E-i** in reaction **System 1**.<sup>1</sup>

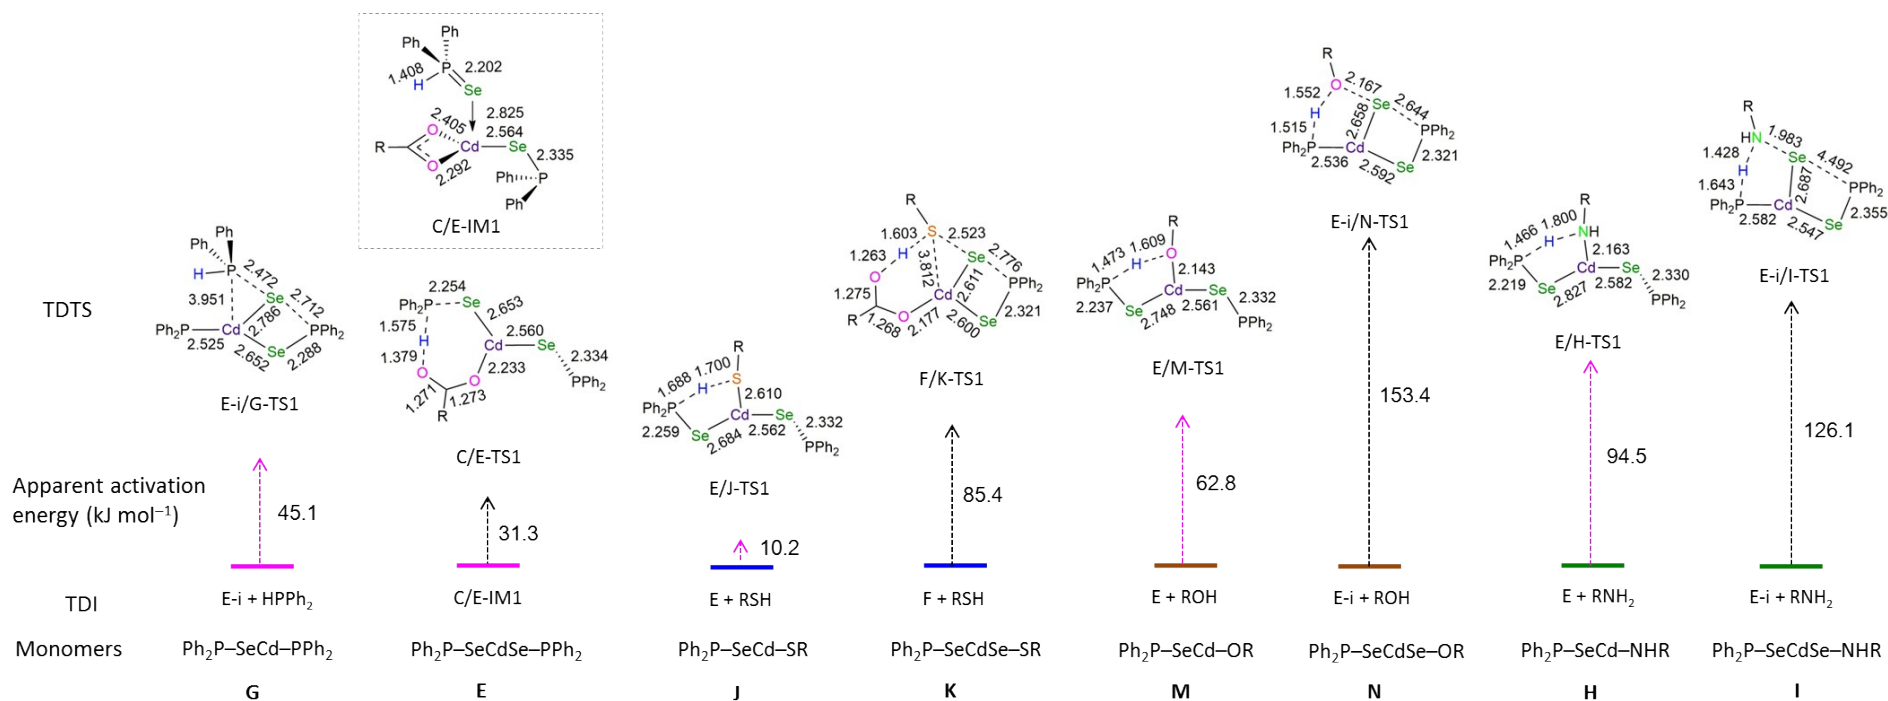

**Figure S6.** Rate-determining step for the formation of CdSe monomers. TDI and TDS denote TOF-determining intermediate and transition state in optimal reaction pathway, respectively.

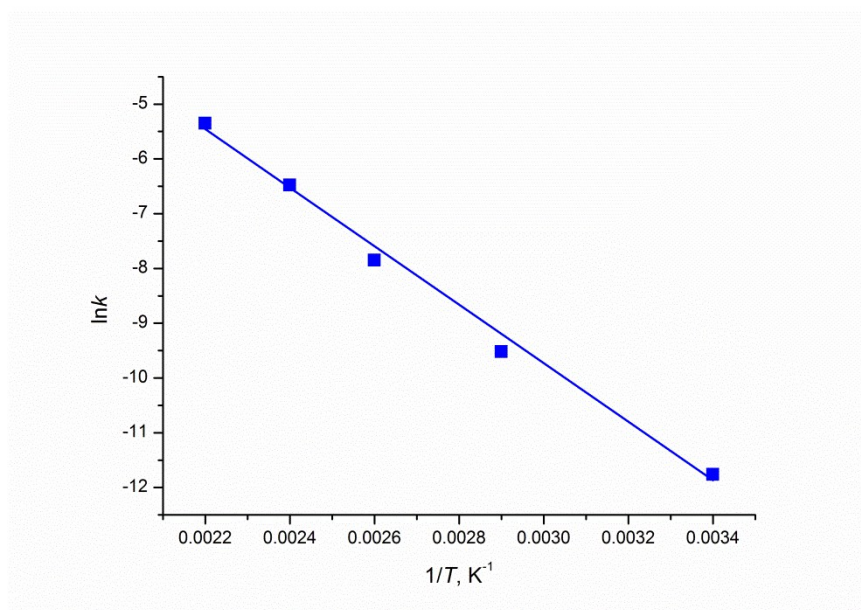

$$k_G(T) = 6.219 \times 10^2 \exp(-45,098 / RT) \quad (\text{s}^{-1} \text{ mol}^{-1} \text{ dm}^3)$$

**Figure S7.** Arrhenius plots of rate constants for the crucial reaction step  $\text{E-i} + \text{HPPH}_2 \rightarrow \text{E-i/G-TS1}$  for the formation of  $\text{Ph}_2\text{P-CdSe-PPh}_2$  (**G**) in the reaction **System 1** ( $\text{HY} = \text{HPPH}_2$ ).



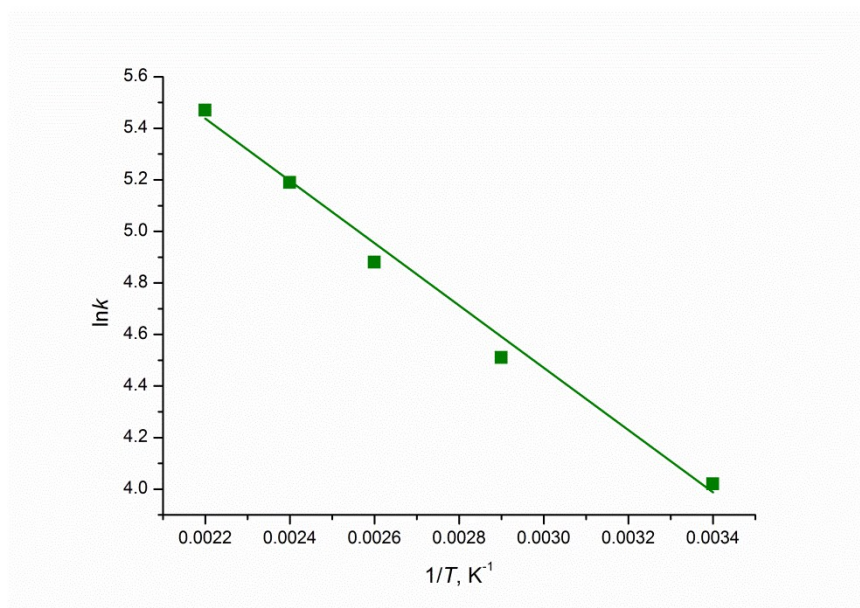

$$k_j = 3.335 \times 10^3 \exp(-10,170 / RT) \quad (\text{s}^{-1} \text{ mol}^{-1} \text{ dm}^3)$$

**Figure S8.** Arrhenius plots of rate constants for the crucial reaction step  $\text{E} + \text{RSH} \rightarrow \text{E/J-TS1}$  for the formation of  $\text{RS-CdSe-PPh}_2$  (**J**) in the reaction **System 2** ( $\text{HY} = \text{RSH} + \text{HPPH}_2$ ).

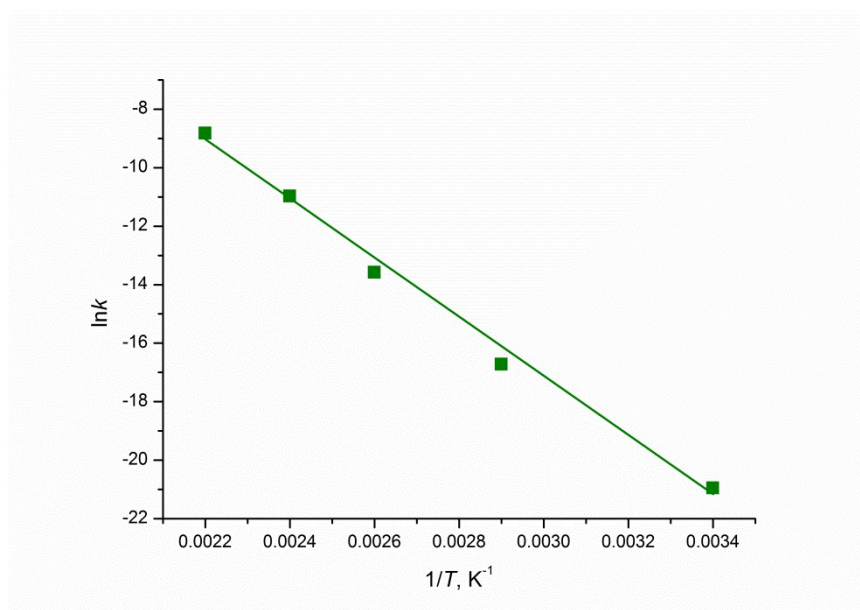

$$k_K = 7.079 \times 10^5 \exp(-85,352 / RT) \text{ (s}^{-1} \text{ mol}^{-1} \text{ dm}^3\text{)}$$

**Figure S9.** Arrhenius plots of rate constants for the crucial reaction step  $\mathbf{F} + \text{RSH} \rightarrow \mathbf{F/K-TS1}$  for the formation of  $\text{Ph}_2\text{P-SeCdSe-SR (K)}$  in the reaction **System 2** ( $\text{HY} = \text{RSH} + \text{HPPH}_2$ ).

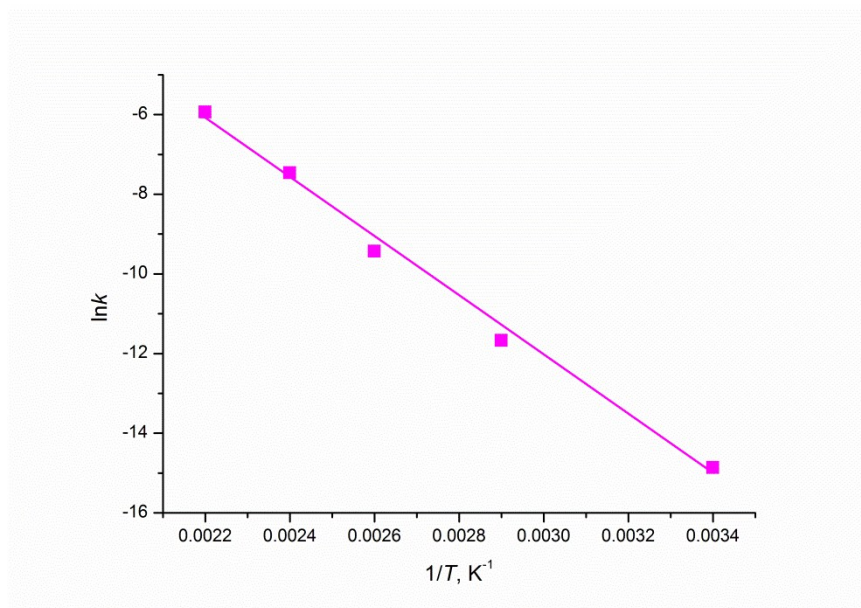

$$k_M = 3.632 \times 10^4 \exp(-62,809 / RT) \quad (\text{s}^{-1} \text{ mol}^{-1} \text{ dm}^3)$$

**Figure S10.** Arrhenius plots of rate constants for the crucial reaction step  $\mathbf{E} + \text{ROH} \rightarrow \mathbf{E}/\mathbf{M}\text{-TS1}$  for the formation of  $\text{RO-CdSe-PPh}_2$  ( $\mathbf{M}$ ) in the reaction **System 3** ( $\text{HY} = \text{ROH} + \text{HPPH}_2$ ).

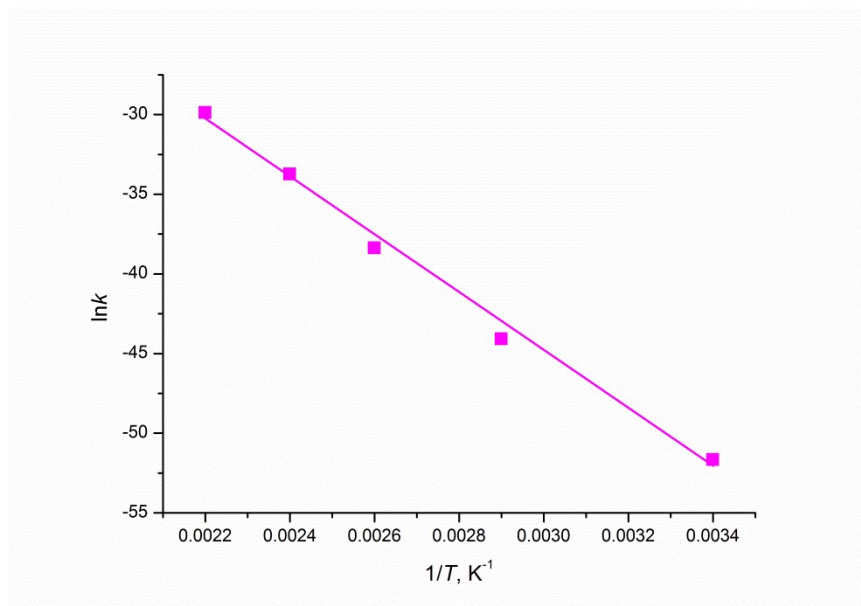

$$k_N = 2.742 \times 10^4 \exp(-153,443 / RT) \quad (\text{s}^{-1} \text{ mol}^{-1} \text{ dm}^3)$$

**Figure S11.** Arrhenius plots of rate constants for the crucial reaction step **E-i** + ROH → **E-i/N-TS1** for the formation of Ph<sub>2</sub>P–SeCdSe–OR (**N**) in the reaction **System 3** (HY = ROH + HPPH<sub>2</sub>).

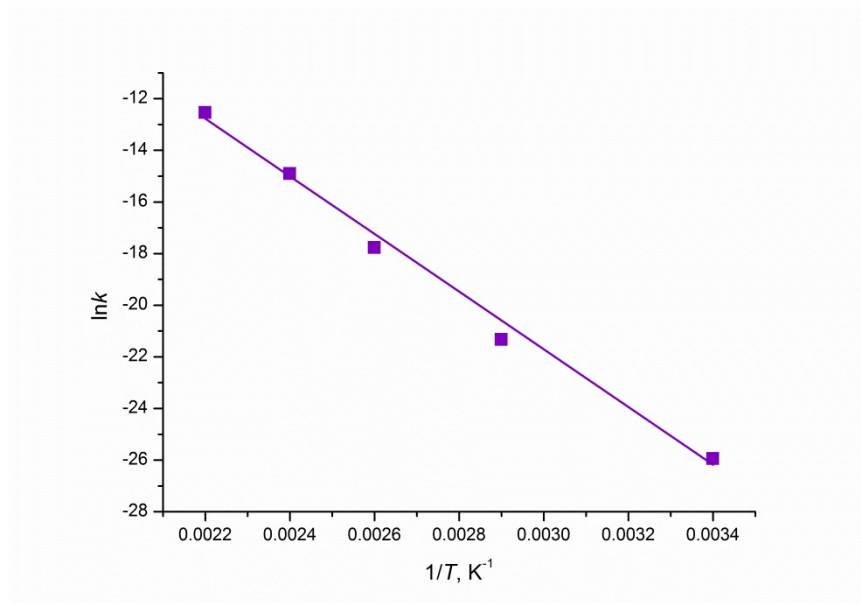

$$k_H(T) = 1.899 \times 10^5 \exp(-94,514 / RT) \quad (\text{s}^{-1} \text{ mol}^{-1} \text{ dm}^3)$$

**Figure S12.** Arrhenius plots of rate constants for the crucial reaction step  $\mathbf{E} + \text{RNH}_2 \rightarrow \mathbf{E}/\mathbf{H}\text{-TS1}$  for the formation of  $\text{RHN-CdSe-PPH}_2$  (**H**) in the reaction **System 4** ( $\text{HY} = \text{RNH}_2 + \text{HPPH}_2$ ).

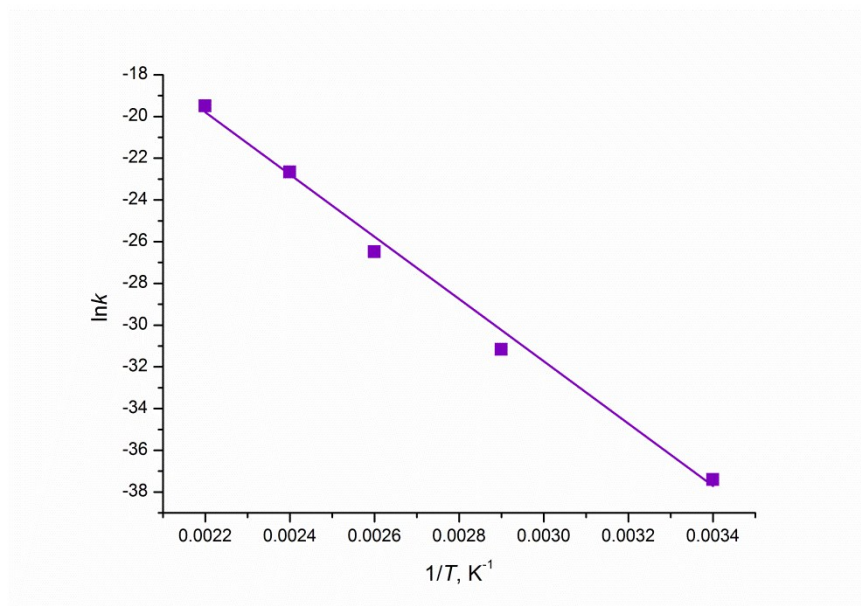

$$k_1(T) = 6.945 \times 10^5 \exp(-126,090 / RT) \quad (\text{s}^{-1} \text{ mol}^{-1} \text{ dm}^3)$$

**Figure S13.** Arrhenius plots of rate constants for the crucial reaction step  $\text{E-i} + \text{RNH}_2 \rightarrow \text{E-i/I-TS1}$  for the formation of  $\text{Ph}_2\text{P-SeCdSe-NHR (I)}$  in the reaction **System 4** ( $\text{HY} = \text{RNH}_2 + \text{HPPH}_2$ ).

**Table S1.** The Natural Bond Orbital (NBO,  $e$ ) charges of the coordinated atom ( $X = \text{Se}, \text{P}, \text{N}, \text{S},$  and  $\text{O}$ ) in ligands ( $\text{HY} = \text{SePPh}_2\text{H}, \text{HPPPh}_2, \text{RNH}_2, \text{RSH},$  and  $\text{ROH}$ ) and stabilization energies ( $\text{kJ mol}^{-1}$ ) of coordination complex  $(\text{HY})\text{Cd}(\text{OA})_2$  and  $(\text{HY})_2\text{Cd}(\text{OA})_2$ .

| item                                                            | SePPh <sub>2</sub> H | HPPPh <sub>2</sub> | RNH <sub>2</sub> | RSH    | ROH    |
|-----------------------------------------------------------------|----------------------|--------------------|------------------|--------|--------|
| NBO charges of $X$                                              | -0.460               | 0.617              | -0.916           | -0.052 | -0.771 |
| Stabilization energies of $(\text{HY})\text{Cd}(\text{OA})_2$   | 17.9                 | -33.4              | 22.6             | -13.0  | -8.7   |
| Stabilization energies of $(\text{HY})_2\text{Cd}(\text{OA})_2$ | -8.9                 | -79.0              | 6.0              | -40.2  | -54.5  |

<sup>a</sup>The data of  $\text{HY} = \text{SePPh}_2\text{H}, \text{HPPPh}_2,$  and  $\text{RNH}_2$  from Ref. 1

As depicted in Figure S1 and Table S1, when one ligand ( $\text{HY}$ ) coordinates to  $\text{Cd}(\text{OA})_2$ , the five-coordination complexes  $(\text{HY})\text{Cd}(\text{OA})_2$  should be generated, with the stabilization energies of  $-13.0$  and  $-8.7 \text{ kJ mol}^{-1}$  for  $\text{RSH}$  and  $\text{ROH}$ , respectively. Alternatively, when two  $\text{RSH}$  ligands coordinate to  $\text{Cd}(\text{OA})_2$ , the six-coordination complexes  $(\text{RSH})_2\text{Cd}(\text{OA})_2$  should be formed, with the stabilization energies of  $-40.2 \text{ kJ mol}^{-1}$ . When two  $\text{ROH}$  ligands coordinate to  $\text{Cd}(\text{OA})_2$ , the four-coordination complexes  $(\text{ROH})_2\text{Cd}(\text{OA})_2$  is generated through two  $\text{Cd-O}$  bonds cleavage of four-coordination complex  $\text{Cd}(\text{OA})_2$ , with the stabilization energies of  $-54.5 \text{ kJ mol}^{-1}$ . It is indicated that the  $G_r$  values of the five-coordination complex are lower than that of the six-coordination complex. Nevertheless, the five- and six-coordination complexes of  $\text{HY}$  toward  $\text{Cd}(\text{OA})_2$  are unstable because of their positive  $G_r$  values.

Based on previous works<sup>1</sup> and this study, Table S1 lists the natural bond orbital (NBO) charges of the coordinated atom in ligands ( $\text{HY} = \text{SePPh}_2\text{H}, \text{HPPPh}_2, \text{RNH}_2, \text{RSH},$  and  $\text{ROH}$ ) and stabilization energies in five-coordination complex  $(\text{HY})\text{Cd}(\text{OA})_2$ . As shown in Table S1, the NBO charges of coordinated atoms are the following from negative to positive:  $-0.916$  ( $\text{RNH}_2$ )  $>$   $-0.771$  ( $\text{ROH}$ )  $>$   $-0.460$  ( $\text{SePPh}_2\text{H}$ )  $>$   $-0.052$  ( $\text{RSH}$ )  $>$   $0.617$  ( $\text{HPPPh}_2$ ). According to the stabilization energies values, the coordination stability of ligands to metal centres of  $\text{Cd}(\text{OA})_2$  decreases as  $\text{RNH}_2 > \text{SePPh}_2\text{H} > \text{ROH} > \text{RSH} > \text{HPPPh}_2$ . It is apparent that the coordination stability is related to NBO charges. The larger of negative charges of coordinated atoms is, the more stable of coordination complex is. Exceptionally, for  $\text{SePPh}_2\text{H}$  and  $\text{ROH}$ , five-coordination complex of  $\text{SePPh}_2\text{H}$  toward  $\text{Cd}(\text{OA})_2$  is more stable than that of  $\text{ROH}$ . This can be ascribed to the steric hindrance of ligands, in which the  $\text{Se}$  atom in the linear  $\text{Se-P}$  of  $\text{SePPh}_2\text{H}$  coordinates more readily than the  $\text{O}$  atom in the triangle of  $\text{ROH}$ , toward  $\text{Cd}(\text{OA})_2$ . Thereupon, coordination stability mainly stems from the electrostatic interaction and steric hindrance between the ligand and  $\text{Cd}(\text{OA})_2$ .

As depicted in Figure S1, for the reaction of  $\text{Cd}(\text{OA})_2$  with  $\text{RSH}$ , initially, the five-coordination complex  $(\text{RSH})\text{Cd}(\text{OA})_2$  (**C3-IM1**) is formed. From **C3-IM1**, a H-shift from  $\text{RSH}$  to carboxylate occurs via a six-membered ring **C3-TS1**, resulting in the carboxylic acid molecular complex **C3-IM2**, with the energy barrier of  $14.3 \text{ kJ mol}^{-1}$  and the energy height of the highest point (EHHP) of  $27.3 \text{ kJ mol}^{-1}$  at **C3-TS1**. Then, **C3-IM2** releases the  $\text{RCOOH}$  molecules free, leaving  $\text{RCOOCd-SR}$  (**C3**) behind, with the exoergicity of  $21.1 \text{ kJ mol}^{-1}$ .

In addition, as shown in Figure S1, for the reaction of  $\text{Cd}(\text{OA})_2$  with  $\text{ROH}$ , firstly, the five-coordination complex  $(\text{ROH})\text{Cd}(\text{OA})_2$  (**C4-IM1**) is formed. From **C4-IM1**, a H-shift takes place via a four-membered cyclic **C4-TS1**, leading to the  $\text{RCOOH}$ -containing molecular complex **C4-IM2**, with the energy barrier of  $107.7 \text{ kJ mol}^{-1}$  and the EHHP of  $116.4 \text{ kJ mol}^{-1}$  at **C4-TS1**. Last, **C4-IM2** releases the carboxylic acid, leaving  $\text{RCOOCd-OR}$  (**C4**), with the exoergicity of  $41.3 \text{ kJ mol}^{-1}$ .

**Table S2.** Relative Gibbs Free Energies and Typical Data for the Reaction of  $\text{Cd}(\text{OA})_2 + \text{HY} \rightarrow \text{RCOOCd-Y} + \text{RCOOH}^{a,b}$ 

| item                     | SePPh <sub>2</sub> H | HPPH <sub>2</sub> | RNH <sub>2</sub> | RSH   | ROH   |
|--------------------------|----------------------|-------------------|------------------|-------|-------|
| $G_r$                    | -56.4                | 34.0              | 86.3             | -21.9 | 70.9  |
| EHHP                     | 4.2                  | 103.6             | 125.0            | 27.3  | 116.4 |
| Radius of X              | 1.17                 | 1.10              | 0.70             | 1.04  | 0.66  |
| Bond length of H-Y       | 1.415                | 1.423             | 1.017            | 1.350 | 0.971 |
| Cd-X distance            | 2.765                | 2.668             | 2.365            | 2.742 | 2.366 |
| No. of TS cyclic members | 7                    | 6                 | 4                | 6     | 4     |

<sup>a</sup>Relative Gibbs free energies ( $G_r$ ,  $\text{kJ mol}^{-1}$ ), energy height of the highest point (EHHP,  $\text{kJ mol}^{-1}$ ), radius ( $\text{\AA}$ ) of the coordinated atom ( $X = \text{Se, P, N, S, and O}$ ), bond length ( $\text{\AA}$ ) of HY, Cd-X Distance ( $\text{\AA}$ ) in complex  $(\text{HY})\text{Cd}(\text{OA})_2$ , and the number of the TS cyclic members for the reaction  $\text{Cd}(\text{OA})_2 + \text{HY} \rightarrow \text{RCOOCd-Y} + \text{RCOOH}$  (See Figure S1).  $\text{HY} = \text{SePPh}_2\text{H, HPPH}_2, \text{RNH}_2, \text{RSH, and ROH}$ .

<sup>b</sup>The data of  $\text{HY} = \text{SePPh}_2\text{H, HPPH}_2, \text{ and RNH}_2$  from Ref. 1

Table S2 summarizes the radii of the coordinated atom (X), bond length in ligand, Cd-X distance in  $(\text{HY})\text{Cd}(\text{OA})_2$ , and the relative activation Gibbs free energy ( $G_r$ ) of TS, considering the reports in previous publications<sup>1</sup> and this study.

As shown in Table S2, for the release of RCOOH from  $\text{Cd}(\text{OA})_2$  and ligands in the reaction (3),  $G_r$  increases as  $-56.4 \text{ kJ mol}^{-1}$  (SePPh<sub>2</sub>H) <  $-21.9 \text{ kJ mol}^{-1}$  (RSH) <  $34.0 \text{ kJ mol}^{-1}$  (HPPH<sub>2</sub>) <  $70.9 \text{ kJ mol}^{-1}$  (ROH) <  $86.3 \text{ kJ mol}^{-1}$  (RNH<sub>2</sub>). The energy height of the highest point (EHHP) increase as  $4.2 \text{ kJ mol}^{-1}$  (SePPh<sub>2</sub>H) <  $27.3 \text{ kJ mol}^{-1}$  (RSH) <  $103.6 \text{ kJ mol}^{-1}$  (HPPH<sub>2</sub>) <  $116.4 \text{ kJ mol}^{-1}$  (ROH) <  $125.0 \text{ kJ mol}^{-1}$  (RNH<sub>2</sub>). It is indicated that the thermodynamics and kinetics of RCOOH release should decrease as  $\text{SePPh}_2\text{H} > \text{RSH} > \text{HPPH}_2 > \text{ROH} > \text{RNH}_2$ .

Furthermore, the radiuses of the coordinated atom in ligands decrease as  $1.17 \text{ \AA}$  (SePPh<sub>2</sub>H) >  $1.10 \text{ \AA}$  (HPPH<sub>2</sub>) >  $1.04 \text{ \AA}$  (RSH) >  $0.70 \text{ \AA}$  (RNH<sub>2</sub>) >  $0.66 \text{ \AA}$  (ROH). The bond length of H-Y in ligands decreases as  $1.423 \text{ \AA}$  (HPPH<sub>2</sub>) >  $1.415 \text{ \AA}$  (SePPh<sub>2</sub>H) >  $1.350 \text{ \AA}$  (RSH) >  $1.017 \text{ \AA}$  (RNH<sub>2</sub>) >  $0.971 \text{ \AA}$  (ROH)  $\approx$   $0.972 \text{ \AA}$  (RCOOH). Typical strengths of the H-Y bonds are the following order:  $300.4 \text{ kJ mol}^{-1}$  (P-H in SePPh<sub>2</sub>H)  $\approx$   $300.2 \text{ kJ mol}^{-1}$  (P-H in HPPH<sub>2</sub>) <  $346.2 \text{ kJ mol}^{-1}$  (S-H in RSH) <  $400.4 \text{ kJ mol}^{-1}$  (N-H in RNH<sub>2</sub>) <  $423.3 \text{ kJ mol}^{-1}$  (O-H in ROH) <  $456.0 \text{ kJ mol}^{-1}$  (O-H in RCOOH). The above data clearly indicate that SePPh<sub>2</sub>H, RSH, and HPPH<sub>2</sub> are more easily providing hydrogen/proton toward  $\text{Cd}(\text{OA})_2$  to the release of RCOOH than RNH<sub>2</sub> and ROH. Cd-X distance in  $(\text{HY})\text{Cd}(\text{OA})_2$  shortens in the reverse order as  $2.765 \text{ \AA}$  (SePPh<sub>2</sub>H) >  $2.742 \text{ \AA}$  (RSH) >  $2.668 \text{ \AA}$  (HPPH<sub>2</sub>) >  $2.366 \text{ \AA}$  (ROH)  $\approx$   $2.365 \text{ \AA}$  (RNH<sub>2</sub>), and the number of TS cyclic member lessens follows in the reverse order as  $7$  (SePPh<sub>2</sub>H) >  $6$  (RSH and HPPH<sub>2</sub>) >  $4$  (ROH and RNH<sub>2</sub>). It is indicated that the longer the Cd-X distance is, and the more the number of TS cyclic members is, which lowers the activation Gibbs free energy is. The lower the activation strain is, the less the activation energy is, and the lower the activation Gibbs free energy is. In short, the longer the Cd-X distance and Z-H bond length make the size of TS cyclic member larger, which makes the activation strain less, and thereby makes the activation Gibbs free energy lower (Table S3).



**Table S3.** Activation strain analysis of transition state ( $\text{kJ mol}^{-1}$ ) and typical lengths ( $\text{\AA}$ ) for the Z–H ( $Z = \text{P, N, S}$  and  $\text{O}$ ) bond cleavage in reaction of  $\text{Cd}(\text{OA})_2$  with ligand ( $\text{HY} = \text{SePPh}_2\text{H, HPPH}_2, \text{RNH}_2, \text{RSH, and ROH}$ ).

| HY                   | Bond | TS      | Length in HY | Length in TS | Stretching in TS | Stretching in TS (%) | $\Delta E_{\text{strain}}^{\ddagger}[\text{HY}]$ | $\Delta E_{\text{strain}}^{\ddagger}[\text{Cd}(\text{OA})_2]$ | $\Delta E_{\text{strain}}^{\ddagger}$ | $\Delta E_{\text{int}}^{\ddagger}$ | $\Delta E^{\ddagger}$ |
|----------------------|------|---------|--------------|--------------|------------------|----------------------|--------------------------------------------------|---------------------------------------------------------------|---------------------------------------|------------------------------------|-----------------------|
| SePPh <sub>2</sub> H | P–H  | C-TS1   | 1.415        | 1.549        | 0.134            | 9.5                  | 30.9                                             | 100.8                                                         | 131.7                                 | –176.4                             | –44.7                 |
| HPPH <sub>2</sub>    | P–H  | C'-TS1  | 1.423        | 1.596        | 0.173            | 12.2                 | 72.0                                             | 96.7                                                          | 168.7                                 | –116.3                             | 52.4                  |
| RNH <sub>2</sub>     | N–H  | C''-TS1 | 1.017        | 1.424        | 0.407            | 40.0                 | 113.4                                            | 165.9                                                         | 279.3                                 | –199.9                             | 79.4                  |
| RSH                  | S–H  | C4-TS1  | 1.350        | 1.715        | 0.365            | 27.0                 | 77.6                                             | 92.8                                                          | 170.4                                 | –192.3                             | –21.9                 |
| ROH                  | O–H  | C5-TS1  | 0.966        | 1.317        | 0.351            | 36.3                 | 96.5                                             | 118.5                                                         | 215.0                                 | –142.5                             | 72.5                  |

To gain insight into how ligands ( $\text{SePPh}_2\text{H, HPPH}_2, \text{RNH}_2, \text{RSH, and ROH}$ ) affect the generation of  $\text{RCOOH}$  or  $\text{Se–P}$  bond cleavage in the formation of  $\text{CdSe}$  monomers, the trends in reactivity are analysed using the Activation Strain Model of chemical reactivity.<sup>6, 7</sup> In this model, the activation energies  $\Delta E^{\ddagger}$  of TS are decomposed into the activation strain energies  $\Delta E_{\text{strain}}^{\ddagger}$  and the stabilizing interaction energies  $\Delta E_{\text{int}}^{\ddagger}$ , *i.e.*,  $\Delta E^{\ddagger} = \Delta E_{\text{strain}}^{\ddagger} + \Delta E_{\text{int}}^{\ddagger}$ .  $\Delta E_{\text{strain}}^{\ddagger}$  is the strain energy associated with deforming the reactants from their equilibrium geometry to the geometry they acquire in the TS.  $\Delta E_{\text{int}}^{\ddagger}$  is the actual interaction energy between the deformed reactants in the TS.<sup>6, 7</sup> The results of the activation strain analysis were summarized in Table S3, according to current data and previous literature.<sup>1</sup>

As illustrated in Table S3, for the Z–H ( $Z = \text{P, N, S, and O}$ ) bond cleavage,  $\Delta E^{\ddagger}$  increases as  $–44.7 \text{ kJ mol}^{-1}$  ( $\text{SePPh}_2\text{H}$ )  $< –21.9 \text{ kJ mol}^{-1}$  ( $\text{RSH}$ )  $< 52.4 \text{ kJ mol}^{-1}$  ( $\text{HPPH}_2$ )  $< 72.5 \text{ kJ mol}^{-1}$  ( $\text{ROH}$ )  $< 79.4 \text{ kJ mol}^{-1}$  ( $\text{RNH}_2$ ).  $\Delta E_{\text{strain}}^{\ddagger}$  increases obviously as  $131.7 \text{ kJ mol}^{-1}$  ( $\text{SePPh}_2\text{H}$ )  $< 170.4 \text{ kJ mol}^{-1}$  ( $\text{RSH}$ )  $\approx 168.7 \text{ kJ mol}^{-1}$  ( $\text{HPPH}_2$ )  $< 215.0 \text{ kJ mol}^{-1}$  ( $\text{ROH}$ )  $< 279.3 \text{ kJ mol}^{-1}$  ( $\text{RNH}_2$ ). The ligand activation-strain term  $\Delta E_{\text{strain}}^{\ddagger}[\text{HY}]$  increases as  $30.9 \text{ kJ mol}^{-1}$  ( $\text{SePPh}_2\text{H}$ )  $< 77.6 \text{ kJ mol}^{-1}$  ( $\text{RSH}$ )  $\approx 72.0 \text{ kJ mol}^{-1}$  ( $\text{HPPH}_2$ )  $< 96.5 \text{ kJ mol}^{-1}$  ( $\text{ROH}$ )  $< 113.4 \text{ kJ mol}^{-1}$  ( $\text{RNH}_2$ ), whereas  $\Delta E_{\text{strain}}^{\ddagger}[\text{Cd}(\text{OA})_2]$  increases as  $92.8 \text{ kJ mol}^{-1}$  ( $\text{RSH}$ )  $\approx 96.7 \text{ kJ mol}^{-1}$  ( $\text{HPPH}_2$ )  $\approx 100.8 \text{ kJ mol}^{-1}$  ( $\text{SePPh}_2\text{H}$ )  $< 118.5 \text{ kJ mol}^{-1}$  ( $\text{ROH}$ )  $< 165.9 \text{ kJ mol}^{-1}$  ( $\text{RNH}_2$ ). That is to say, the  $\Delta E_{\text{strain}}^{\ddagger}$  of TS,  $\text{Cd}(\text{OA})_2$ , and ligands change in the same order as  $\Delta E^{\ddagger}$ . Moreover, it is apparent that the activation strain is correlated nearly with the percentage-wise extent of bond stretching in the TS (see Table S3). The percentage-wise bond elongation in the TS increases as  $\text{SePPh}_2\text{H} < \text{HPPH}_2 < \text{RSH} < \text{ROH} < \text{RNH}_2$ . This nearly relates to  $\Delta E_{\text{strain}}^{\ddagger}$ . It is indicated that the activation strain favors the P–H and S–H cleavage over the O–H and N–H cleavage.

On the other hand,  $\Delta E_{\text{int}}^{\ddagger}$  of the TS decreases as  $–199.9 \text{ kJ mol}^{-1}$  ( $\text{RNH}_2$ )  $> –192.3 \text{ kJ mol}^{-1}$  ( $\text{RSH}$ )  $> –176.4 \text{ kJ mol}^{-1}$  ( $\text{SePPh}_2\text{H}$ )  $> –142.5 \text{ kJ mol}^{-1}$  ( $\text{ROH}$ )  $> –116.3 \text{ kJ mol}^{-1}$  ( $\text{HPPH}_2$ ). It is indicated that the stabilizing interaction with  $\text{HPPH}_2$  is the least. This may derived from the repulsion of the positive P in  $\text{HPPH}_2$  and the positive Cd in  $\text{Cd}(\text{OA})_2$ , whereas the electrostatic interaction exists between the negative N, S, Se, and O in ligands and the positive Cd. For  $\text{RNH}_2$ , the value of  $\Delta E_{\text{int}}^{\ddagger}$  is the minimum,  $\Delta E_{\text{strain}}^{\ddagger}$  is the strongest, and  $\Delta E^{\ddagger}$  is the largest. The phenomenon shows that the activation strain plays an important role for the release of  $\text{RCOOH}$  from  $\text{Cd}(\text{OA})_2$  and ligands. Consequently, for the release of  $\text{RCOOH}$  from  $\text{Cd}(\text{OA})_2$ , ligands meet the following demands, the lowering of the activation strain and the strengthening of the stabilizing TS interaction, which lower the activation energies. Thereby, interacting with  $\text{Cd}(\text{OA})_2$  for the release of  $\text{RCOOH}$ ,  $\text{RNH}_2$  and  $\text{ROH}$  are the most difficult owing to the strong activation strain of activated N–H and O–H bond.  $\text{SePPh}_2\text{H}$  and  $\text{RSH}$  are the easiest both because of the weak activation strain of P–H and S–H bond activation and the strong stabilizing TS interaction. Whereas, thanks to the weak activation strain of P–H bond activation and the weak stabilizing TS interaction,  $\text{HPPH}_2$  is in the middle among five ligands. In other words, the capacity of releasing  $\text{RCOOH}$  decreases as  $\text{SePPh}_2\text{H} > \text{RSH} > \text{HPPH}_2 > \text{ROH} > \text{RNH}_2$  in the reaction of  $\text{Cd}(\text{OA})_2$  and ligands.

**Table S4.** Relative Gibbs free energies ( $G_r$ ,  $\text{kJ mol}^{-1}$ ), energy height of the highest point (EHHP,  $\text{kJ mol}^{-1}$ ), and highest energy barrier (HEB,  $\text{kJ mol}^{-1}$ ) in the reaction (4) of  $\text{Ph}_2\text{P-SeCd-Y} + \text{SePPh}_2\text{H} \rightleftharpoons \text{Ph}_2\text{P-SeCdSe-Y} + \text{HPPH}_2$  calculated at the M06//B3LYP/6-31++G(d, p), SDD level in 1-octadecene under room temperature (298.15 K) and atmospheric pressure (1 atm).  $Y = -\text{PPh}_2, -\text{SR}, -\text{OR}, -\text{NHR}$ .

| Y               | Reaction                                                                                                                                                    | $G_r$ | EHHP  | HEB   |
|-----------------|-------------------------------------------------------------------------------------------------------------------------------------------------------------|-------|-------|-------|
| $-\text{PPh}_2$ | $\text{Ph}_2\text{P-CdSe-PPh}_2$ ( <b>G</b> ) + $\text{SePPh}_2\text{H} \rightleftharpoons \text{Ph}_2\text{P-SeCdSe-PPh}_2$ ( <b>E</b> ) + $\text{HPPH}_2$ | -90.5 | 25.1  | 45.1  |
| $-\text{SR}$    | $\text{RS-CdSe-PPh}_2$ ( <b>J</b> ) + $\text{SePPh}_2\text{H} \rightleftharpoons \text{Ph}_2\text{P-SeCdSe-SR}$ ( <b>K</b> ) + $\text{HPPH}_2$              | -17.3 | 143.0 | 216.2 |
| $-\text{OR}$    | $\text{RO-CdSe-PPh}_2$ ( <b>M</b> ) + $\text{SePPh}_2\text{H} \rightleftharpoons \text{Ph}_2\text{P-SeCdSe-OR}$ ( <b>N</b> ) + $\text{HPPH}_2$              | -0.1  | 199.0 | 184.9 |
| $-\text{NHR}$   | $\text{RHN-CdSe-PPh}_2$ ( <b>H</b> ) + $\text{SePPh}_2\text{H} \rightleftharpoons \text{Ph}_2\text{P-SeCdSe-NHR}$ ( <b>I</b> ) + $\text{HPPH}_2$            | -48.0 | 221.2 | 190.2 |

As shown in Figure 5a,b, for  $Y = -\text{PPh}_2$ ,  $\text{Ph}_2\text{P-CdSe-PPh}_2$  (**G**) +  $\text{SePPh}_2\text{H} \rightleftharpoons \text{Ph}_2\text{P-SeCdSe-PPh}_2$  (**E**) +  $\text{HPPH}_2$  have been discussed in previous works.<sup>1</sup> The reaction **G** +  $\text{SePPh}_2\text{H} \rightleftharpoons \text{E}$  +  $\text{HPPH}_2$  can take place Se exchange reaction, with the HEB of  $45.1 \text{ kJ mol}^{-1}$ , the EHHP of  $25.1 \text{ kJ mol}^{-1}$ , and the exoergicity of  $90.5 \text{ kJ mol}^{-1}$ .<sup>1</sup>

As indicated in Figure 5a,b and Table S4, for  $Y = -\text{SR}$ ,  $\text{RS-CdSe-PPh}_2$  (**J**) +  $\text{SePPh}_2\text{H} \rightleftharpoons \text{Ph}_2\text{P-SeCdSe-SR}$  (**K**) +  $\text{HPPH}_2$ , in the beginning, **J** isomerizes to  $\text{Ph}_2\text{P-CdSe-SR}$  (**J-i**) via a four-membered ring **J/J-i-TS1**. Next, a three-coordination complex **K/J-i-IM2** is formed by the Se atom of  $\text{SePPh}_2\text{H}$  interacting with the central Cd atom of **J-i**. After that, [1,4]-H shift takes place from  $-\text{PPh}_2$  group to  $\text{HPPH}_2$  via a five-membered cyclic **K/J-i-TS1**, resulting in a  $\text{HPPH}_2$ -containing molecular complex **K/J-i-IM1**. Last, **K/J-i-IM1** releases the  $\text{HPPH}_2$  molecular free, leaving isomer  $\text{Ph}_2\text{P-SeCdSe-SR}$  (**K**) monomer behind. For  $\text{Ph}_2\text{P-CdSe-SR}$  (**J-i**), the occupancies of P-Cd, Cd-Se, and Se-S are 1.766, 1.883, and 1.987  $e$ , respectively, from NBO analysis. It is indicated that complete single-bond exist in the P-Cd-Se-S skeleton. This reaction includes the HEB of  $216.2 \text{ kJ mol}^{-1}$  at the reaction step of **J**  $\rightarrow$  **J/J-i-TS1**, the EHHP of  $143.0 \text{ kJ mol}^{-1}$  at **J/J-i-TS1**, and the exoergicity of  $17.3 \text{ kJ mol}^{-1}$ .

As shown in Figure 5a,b, for  $Y = -\text{NHR}$ ,  $\text{RNH-CdSe-PPh}_2$  (**H**) +  $\text{SePPh}_2\text{H} \rightleftharpoons \text{Ph}_2\text{P-SeCdSe-NHR}$  (**I**) +  $\text{HPPH}_2$  have an analogous reaction process as mentioned above. NBO results show that the occupancies of P-Cd, Cd-Se, and Se-N in **H-i** monomer are 1.775, 1.884, and 1.983  $e$ , respectively, indicating complete single-bond in the P-Cd-Se-N skeleton. This reaction includes the HEB of  $190.2 \text{ kJ mol}^{-1}$  at the reaction step of **H**  $\rightarrow$  **H/H-i-TS1**, the EHHP of  $221.2 \text{ kJ mol}^{-1}$  at **H/H-i-TS1**, and the exoergicity of  $48.0 \text{ kJ mol}^{-1}$ .

As indicated in Figure 5a,b, for  $Y = -\text{OR}$ ,  $\text{RO-CdSe-PPh}_2$  (**M**) +  $\text{SePPh}_2\text{H} \rightleftharpoons \text{Ph}_2\text{P-SeCdSe-OR}$  (**N**) +  $\text{HPPH}_2$  have a similar reaction process as mentioned before. For  $\text{Ph}_2\text{P-CdSe-OR}$  (**M-i**), the occupancies of P-Cd, Cd-Se, and Se-O are 1.771, 1.875, and 1.985  $e$ , respectively, indicating complete single-bond in the P-Cd-Se-O skeleton. This reaction includes the HEB of  $184.9 \text{ kJ mol}^{-1}$  at the reaction step of **M**  $\rightarrow$  **M/M-i-TS1**, the EHHP of  $199.0 \text{ kJ mol}^{-1}$  at **M/M-i-TS1**, and the exoergicity of  $0.1 \text{ kJ mol}^{-1}$ .

**Table S5.** Relative Gibbs free energies ( $\Delta G$ , kJ mol<sup>-1</sup>) to **1** (Ph<sub>2</sub>P–Y) + Se=PPh<sub>2</sub>H for all the species in the reaction of Ph<sub>2</sub>P–Y (**1**) + SePPh<sub>2</sub>H  $\rightleftharpoons$  Ph<sub>2</sub>P(Se)–Y (**2**) + HPPPh<sub>2</sub> calculated at the M06//B3LYP/6-31++G(d, p), SDD level in 1-octadecene under room temperature (298.15 K) and atmospheric pressure (1 atm). Y = –OOCR (**a**), –PPh<sub>2</sub> (**b**), –NHR (**c**), –SR (**d**), and –OR (**e**).

| Y                 | Reaction                                                                                                                                                               | $\Delta G$ | EHHP or HEB | P-containing compounds detected <sup>a</sup>                                 |
|-------------------|------------------------------------------------------------------------------------------------------------------------------------------------------------------------|------------|-------------|------------------------------------------------------------------------------|
| –<br>OOCR         | Ph <sub>2</sub> P–OOCR ( <b>1a</b> ) + SePPh <sub>2</sub> H $\rightleftharpoons$ Ph <sub>2</sub> P(Se)–OOCR ( <b>2a</b> ) + HPPPh <sub>2</sub>                         | 8.3        | 133.8       | Ph <sub>2</sub> P–OOCR ( <b>1a</b> )                                         |
| –PPh <sub>2</sub> | Ph <sub>2</sub> P–PPh <sub>2</sub> ( <b>1b</b> ) + SePPh <sub>2</sub> H $\rightleftharpoons$ Ph <sub>2</sub> P(Se)–PPh <sub>2</sub> ( <b>2b</b> ) + HPPPh <sub>2</sub> | 34.9       | 151.7       | Ph <sub>2</sub> P–PPh <sub>2</sub> ( <b>1b</b> )                             |
| –NHR              | Ph <sub>2</sub> P–NHR ( <b>1c</b> ) + SePPh <sub>2</sub> H $\rightleftharpoons$ Ph <sub>2</sub> P(Se)–NHR ( <b>2c</b> ) + HPPPh <sub>2</sub>                           | –<br>17.8  | 120.4       | Ph <sub>2</sub> P–NHR ( <b>1c</b> ), Ph <sub>2</sub> P(Se)–NHR ( <b>2c</b> ) |
| –SR               | Ph <sub>2</sub> P–SR ( <b>1d</b> ) + SePPh <sub>2</sub> H $\rightleftharpoons$ Ph <sub>2</sub> P(Se)–SR ( <b>2d</b> ) + HPPPh <sub>2</sub>                             | 8.6        | 126.8       | Ph <sub>2</sub> P–SR ( <b>1d</b> )                                           |
| –OR               | Ph <sub>2</sub> P–OR ( <b>1e</b> ) + SePPh <sub>2</sub> H $\rightleftharpoons$ Ph <sub>2</sub> P(Se)–OR ( <b>2e</b> ) + HPPPh <sub>2</sub>                             | –<br>24.5  | 114.1       | Ph <sub>2</sub> P–OR ( <b>1e</b> ), Ph <sub>2</sub> P(Se)–OR ( <b>2e</b> )   |

<sup>a</sup>From ref.<sup>2-5</sup>

**Table S6.** Apparent activation energy (AAE, kJ mol<sup>-1</sup>), rate-determining step involved bond cleavage, and comparison of correlation parameters for the formation of P-containing compounds Ph<sub>2</sub>P–Y (**1**) and Ph<sub>2</sub>P(Se)–Y (**2**). Y = –OOCR (**a**), –PPh<sub>2</sub> (**b**), –NHR (**c**), –SR (**d**), and –OR (**e**).

| Y                 | Ph <sub>2</sub> P–Y ( <b>1</b> )                     |                        |       |                |      |               | Ph <sub>2</sub> P(Se)–Y ( <b>2</b> )                   |                  |       |                |       |               |
|-------------------|------------------------------------------------------|------------------------|-------|----------------|------|---------------|--------------------------------------------------------|------------------|-------|----------------|-------|---------------|
|                   | Monomers                                             | Optimal paths          | EHHP  | G <sub>r</sub> | AAE  | Bond cleavage | Monomers                                               | Optimal paths    | EHHP  | G <sub>r</sub> | AAE   | Bond cleavage |
| –OOCR             | RCOOCdSe–PPh <sub>2</sub> ( <b>C</b> )               | <b>RP-C</b>            | 4.2   | –56.4          |      |               | RCOOCdSe <sub>2</sub> PPh <sub>2</sub> ( <b>F</b> )    | <b>RP-CF</b>     | 4.2   | –133.0         |       |               |
| –PPh <sub>2</sub> | Ph <sub>2</sub> P–CdSe–PPh <sub>2</sub> ( <b>G</b> ) | <b>RP-CFE-iG</b>       | 5.9   | –20.0          | 45.1 | Se–P          | Ph <sub>2</sub> PSe–Cd–SePPh <sub>2</sub> ( <b>E</b> ) | <b>RP-CE</b>     | –42.8 | –110.5         | 31.3  | P–H           |
| –NHR              | RHN–CdSe–PPh <sub>2</sub> ( <b>H</b> )               | <b>RP-CEH, RP-CFEH</b> | 37.6  | 31.0           | 94.5 | N–H           | Ph <sub>2</sub> PSe–CdSe–NHR ( <b>I</b> )              | <b>RP-CFE-ii</b> | 71.0  | –17.0          | 126.1 | P–N,<br>Se–P  |
| –SR               | RS–CdSe–PPh <sub>2</sub> ( <b>J</b> )                | <b>RP-CEJ</b>          | –42.8 | –73.2          | 10.2 | S–H           | Ph <sub>2</sub> PSe–CdSe–SR ( <b>K</b> )               | <b>RP-CFK</b>    | –6.8  | –90.5          | 85.4  | S–H,<br>Se–P  |
| –OR               | RO–CdSe–PPh <sub>2</sub> ( <b>M</b> )                | <b>RP-CEM, RP-CFEM</b> | –0.6  | 14.1           | 62.8 | O–H           | Ph <sub>2</sub> PSe–CdSe–OR ( <b>N</b> )               | <b>RP-CFE-iN</b> | 104.9 | 14.0           | 153.4 | O–H,<br>Se–P  |

**Table S7.** Activation strain analysis of transition state ( $\text{kJ mol}^{-1}$ ) and typical lengths ( $\text{\AA}$ ) for the Se–P Bond cleavage in reaction of  $\text{Ph}_2\text{P–CdSe}_2\text{PPh}_2$  (**E-i**) or  $\text{RCOOCdSe}_2\text{PPh}_2$  (**F**) with ligands ( $\text{HY} = \text{HPPH}_2, \text{RNH}_2, \text{RSH}, \text{and ROH}$ ).

| HY                | Bond | TS        | Length in E-i or F | Length in TS | Stretching in TS | Stretching in TS (%) | $\Delta E_{\text{strain}}^{\ddagger} [\text{HY}]$ | $\Delta E_{\text{strain}}^{\ddagger} [\text{E-i or F}]$ | $\Delta E_{\text{strain}}^{\ddagger}$ | $\Delta E_{\text{int}}^{\ddagger}$ | $\Delta E^{\ddagger}$ |
|-------------------|------|-----------|--------------------|--------------|------------------|----------------------|---------------------------------------------------|---------------------------------------------------------|---------------------------------------|------------------------------------|-----------------------|
| HPPH <sub>2</sub> | Se–P | E-i/G-TS1 | 2.246              | 2.712        | 0.466            | 20.7                 | 7.6                                               | 99.8                                                    | 107.4                                 | –64.4                              | 43.0                  |
| RNH <sub>2</sub>  | Se–P | E-i/I-TS1 | 2.246              | 4.492        | 2.246            | 100                  | 102.4                                             | 283.4                                                   | 385.8                                 | –260.6                             | 125.2                 |
| RSH               | Se–P | F/K-TS1   | 2.254              | 2.776        | 0.522            | 23.2                 | 44.3                                              | 162.7                                                   | 207.0                                 | –124.4                             | 82.6                  |
| ROH               | Se–P | E-i/N-TS1 | 2.246              | 2.644        | 0.398            | 17.7                 | 286.1                                             | 137.9                                                   | 424.0                                 | –272.9                             | 151.1                 |

As shown in Table S7, for the Se–P bond cleavage in the CdSe monomers formation,  $\Delta E^{\ddagger}$  increases as  $43.0 \text{ kJ mol}^{-1}$  (HPPH<sub>2</sub>) <  $82.6 \text{ kJ mol}^{-1}$  (RSH) <  $125.2 \text{ kJ mol}^{-1}$  (RNH<sub>2</sub>) <  $151.1 \text{ kJ mol}^{-1}$  (ROH).  $\Delta E_{\text{strain}}^{\ddagger}$  increases significantly as  $107.4 \text{ kJ mol}^{-1}$  (HPPH<sub>2</sub>) <  $207.0 \text{ kJ mol}^{-1}$  (RSH) <  $385.8 \text{ kJ mol}^{-1}$  (RNH<sub>2</sub>) <  $424.0 \text{ kJ mol}^{-1}$  (ROH). The substrate ligand  $\Delta E_{\text{strain}}^{\ddagger} [L]$  increases as  $7.6 \text{ kJ mol}^{-1}$  (HPPH<sub>2</sub>) <  $44.3 \text{ kJ mol}^{-1}$  (RSH) <  $102.4 \text{ kJ mol}^{-1}$  (RNH<sub>2</sub>) <  $286.1 \text{ kJ mol}^{-1}$  (ROH). The substrate E-i or F activation-strain term  $\Delta E_{\text{strain}}^{\ddagger} [\text{E-i or F}]$  increases as  $99.8 \text{ kJ mol}^{-1}$  (HPPH<sub>2</sub>) <  $162.7 \text{ kJ mol}^{-1}$  (RSH) <  $283.4 \text{ kJ mol}^{-1}$  (RNH<sub>2</sub>) <  $137.9 \text{ kJ mol}^{-1}$  (ROH). That is to say, for the Se–P cleavage,  $\Delta E_{\text{strain}}^{\ddagger}$  varies in the same order as  $\Delta E^{\ddagger}$ . In addition,  $\Delta E_{\text{strain}}^{\ddagger}$  is related to the percentage-wise extent of Se–P bond stretching in the TS, as inferred in the Table S7. It is indicated that the activation strain favors the Se–P bond cleavage in the presence of HPPH<sub>2</sub> and RSH over that in the presence of RNH<sub>2</sub> and ROH. For another,  $\Delta E_{\text{int}}^{\ddagger}$  increases as  $–64.4 \text{ kJ mol}^{-1}$  (HPPH<sub>2</sub>) <  $–124.4 \text{ kJ mol}^{-1}$  (RSH) <  $–260.6 \text{ kJ mol}^{-1}$  (RNH<sub>2</sub>) <  $–272.9 \text{ kJ mol}^{-1}$  (ROH), which takes in the same order as the activation energy  $\Delta E^{\ddagger}$ . It is indicated that the stabilizing TS interaction prefers RNH<sub>2</sub> and ROH to HPPH<sub>2</sub> and RSH. Overall, for the Se–P bond cleavage, the activation strain  $\Delta E_{\text{strain}}^{\ddagger}$  play a central role. The capacity of Se–P bond cleavage decreases as HPPH<sub>2</sub> > RSH > RNH<sub>2</sub> > ROH in the formation of CdSe monomers, which originates from the size of coordinated atom radius ( $X = \text{P}, \text{S}, \text{N}, \text{and O}$ ). As indicated in Table S2, the radius of the coordinated atom of HY decrease as  $1.10 \text{ \AA}$  (HPPH<sub>2</sub>) >  $1.04 \text{ \AA}$  (RSH) >  $0.70 \text{ \AA}$  (RNH<sub>2</sub>) >  $0.66 \text{ \AA}$  (ROH), which takes in the same order as above.

**Table S8.** The zero-point energies (*ZPE*, hartree), thermal correction to Gibbs free energy ( $G_0$ , hartree) of various species calculated at the B3LYP/6-31++G(d, p), SDD level in the gas phase under atmospheric pressure and room temperature (298.15 K and 1 atm). Polarizable continuum model correction energies (*PCM-E*, hartree), total energies ( $E_c$ , hartree) corrected by *ZPE*, sum of electronic and thermal free energies ( $G_c$ , hartree) corrected by  $G_0$ , relative energies ( $E_r$ , kJ mol<sup>-1</sup>) and relative Gibbs free energies ( $G_r$ , kJ mol<sup>-1</sup>) to Cd(OA)<sub>2</sub> + *n*HY (HY = RSH and ROH; *n* = 1 ~ 2) for all the species in the reaction of Cd(OA)<sub>2</sub> + *n*HY → (HY)<sub>*n*</sub>Cd(OA)<sub>2</sub>, Cd(OA)<sub>2</sub> + RSH → **C4** + RCOOH, and Cd(OA)<sub>2</sub> + ROH → **C5** + RCOOH calculated at the M06//B3LYP/6-31++G(d, p), SDD level in 1-octadecene solution under room temperature and atmospheric pressure (298.15 K and 1 atm).

| Species                                | M06//B3LYP/6-31++G(d, p), SDD<br>(298.15 K and 1 atm) |         |              |                                  |       |                           |       |
|----------------------------------------|-------------------------------------------------------|---------|--------------|----------------------------------|-------|---------------------------|-------|
|                                        | <i>ZPE</i>                                            | $G_0$   | <i>PCM-E</i> | $E_c(\text{PCM-E} + \text{ZPE})$ | $E_r$ | $G_c(\text{PCM-E} + G_0)$ | $G_r$ |
| RSH                                    | 0.07493                                               | 0.04829 | -477.92093   | -477.84600                       |       | -477.87264                |       |
| ROH                                    | 0.07988                                               | 0.05449 | -154.95830   | -154.87842                       |       | -154.90381                |       |
| Cd(OA) <sub>2</sub>                    | 0.15896                                               | 0.11333 | -703.16954   | -703.01058                       |       | -703.05621                |       |
| RCOOH                                  | 0.09058                                               | 0.06013 | -268.27275   | -268.18218                       |       | -268.21262                |       |
| RSH + Cd(OA) <sub>2</sub>              | 0.23389                                               | 0.16161 | -1181.09047  | -1180.85658                      | 0.0   | -1180.92886               | 0.0   |
| (RSH)Cd(OA) <sub>2</sub> , C4-IM1      | 0.23515                                               | 0.17881 | -1181.10274  | -1180.86759                      | -28.9 | -1180.92393               | 13.0  |
| C4-TS1                                 | 0.23302                                               | 0.17946 | -1181.09793  | -1180.86491                      | -21.9 | -1180.91848               | 27.3  |
| C4-IM2                                 | 0.23853                                               | 0.18274 | -1181.11192  | -1180.87339                      | -44.1 | -1180.92918               | -0.8  |
| C4                                     | 0.14684                                               | 0.10316 | -912.82773   | -912.68089                       |       | -912.72457                |       |
| C4 + RCOOH                             | 0.23741                                               | 0.16329 | -1181.10048  | -1180.86307                      | -17.0 | -1180.93719               | -21.9 |
| ROH + Cd(OA) <sub>2</sub>              | 0.23884                                               | 0.16782 | -858.12784   | -857.88900                       | 0.0   | -857.96002                | 0.0   |
| (ROH)Cd(OA) <sub>2</sub> , C5-IM1      | 0.24034                                               | 0.18443 | -858.14112   | -857.90078                       | -30.9 | -857.95669                | 8.7   |
| C5-TS1                                 | 0.23619                                               | 0.18188 | -858.09756   | -857.86137                       | 72.5  | -857.91568                | 116.4 |
| C5-IM2                                 | 0.23973                                               | 0.18387 | -858.10116   | -857.86143                       | 72.4  | -857.91729                | 112.2 |
| C5                                     | 0.14851                                               | 0.10556 | -589.82596   | -589.67745                       |       | -589.72040                |       |
| C5 + RCOOH                             | 0.23909                                               | 0.16570 | -858.09871   | -857.85962                       | 77.1  | -857.93302                | 70.9  |
| 2RSH + Cd(OA) <sub>2</sub>             | 0.30882                                               | 0.20990 | -1659.01140  | -1658.70258                      | 0.0   | -1658.80150               | 0.0   |
| (RSH) <sub>2</sub> Cd(OA) <sub>2</sub> | 0.31117                                               | 0.24420 | -1659.03040  | -1658.71923                      | -43.7 | -1658.78620               | 40.2  |
| 2ROH + Cd(OA) <sub>2</sub>             | 0.31871                                               | 0.22231 | -1013.08614  | -1012.76742                      | 0.0   | -1012.86383               | 0.0   |
| (ROH) <sub>2</sub> Cd(OA) <sub>2</sub> | 0.32241                                               | 0.26055 | -1013.10363  | -1012.78122                      | -36.2 | -1012.84307               | 54.5  |

**Table S9.** The zero-point energies (*ZPE*, hartree), thermal correction to Gibbs free energy ( $G_0$ , hartree) of various species calculated at the B3LYP/6-31++G(d, p), SDD level in the gas phase under atmospheric pressure and room temperature (298.15 K and 1 atm). Polarizable continuum model correction energies (*PCM-E*, hartree), total energies ( $E_c$ , hartree) corrected by *ZPE*, sum of electronic and thermal free energies ( $G_c$ , hartree) corrected by  $G_0$ , relative energies ( $E_r$ , kJ mol<sup>-1</sup>) and relative Gibbs free energies ( $G_r$ , kJ mol<sup>-1</sup>) to Cd(OA)<sub>2</sub> + SePPh<sub>2</sub>H + RSH for all the species in the reaction of Cd(OA)<sub>2</sub> + SePPh<sub>2</sub>H + RSH → J + 2RCOOH (C + RSH → J + RCOOH, E + RSH → J + SePPh<sub>2</sub>H, F + RSH + HPPH<sub>2</sub> → J + RCOOH + SePPh<sub>2</sub>H, and G + RSH → J + HPPH<sub>2</sub>) calculated at the M06//B3LYP/6-31++G(d, p), SDD level in 1-octadecene solution under room temperature and atmospheric pressure (298.15 K and 1 atm).

| Species                                                     | M06//B3LYP/6-31++G(d, p), SDD<br>(298.15 K and 1 atm) |         |              |                                  |        |                           |        |
|-------------------------------------------------------------|-------------------------------------------------------|---------|--------------|----------------------------------|--------|---------------------------|--------|
|                                                             | <i>ZPE</i>                                            | $G_0$   | <i>PCM-E</i> | $E_c(\text{PCM-E} + \text{ZPE})$ | $E_r$  | $G_c(\text{PCM-E} + G_0)$ | $G_r$  |
| Cd(OA) <sub>2</sub>                                         | 0.15896                                               | 0.11333 | -703.16954   | -703.01058                       |        | -703.05621                |        |
| SePPh <sub>2</sub> H                                        | 0.19343                                               | 0.15007 | -814.22030   | -814.02687                       |        | -814.07023                |        |
| HPPH <sub>2</sub>                                           | 0.19113                                               | 0.15188 | -804.87857   | -804.68745                       |        | -804.72669                |        |
| RSH                                                         | 0.07493                                               | 0.04829 | -477.92093   | -477.84600                       |        | -477.87264                |        |
| RCOOH                                                       | 0.09058                                               | 0.06013 | -268.27275   | -268.18218                       |        | -268.21262                |        |
| Cd(OA) <sub>2</sub> + SePPh <sub>2</sub> H + RSH            | 0.42732                                               | 0.31168 | -1995.31076  | -1994.88344                      | 0.0    | -1994.99908               | 0.0    |
| C                                                           | 0.26354                                               | 0.20472 | -1249.14001  | -1248.87647                      |        | -1248.93529               |        |
| C + RSH + RCOOH                                             | 0.42904                                               | 0.31314 | -1995.33369  | -1994.90465                      | -55.7  | -1995.02055               | -56.4  |
| C/J-IM1                                                     | 0.33996                                               | 0.27260 | -1727.07332  | -1726.73337                      |        | -1726.80073               |        |
| C/J-IM1 + RCOOH                                             | 0.43053                                               | 0.33273 | -1995.34608  | -1994.91554                      | -84.3  | -1995.01335               | -37.5  |
| C/J-TS1                                                     | 0.33842                                               | 0.27066 | -1727.06242  | -1726.72401                      |        | -1726.79177               |        |
| C/J-TS1 + RCOOH                                             | 0.42899                                               | 0.33079 | -1995.33518  | -1994.90618                      | -59.7  | -1995.00439               | -13.9  |
| C/J-IM2                                                     | 0.34319                                               | 0.27543 | -1727.08110  | -1726.73792                      |        | -1726.80567               |        |
| C/J-IM2 + RCOOH                                             | 0.43376                                               | 0.33556 | -1995.35386  | -1994.92009                      | -96.2  | -1995.01829               | -50.4  |
| J                                                           | 0.25157                                               | 0.19517 | -1458.79688  | -1458.54530                      |        | -1458.60171               |        |
| J + 2RCOOH                                                  | 0.43273                                               | 0.31544 | -1995.34238  | -1994.90966                      | -68.8  | -1995.02694               | -73.2  |
| E                                                           | 0.36828                                               | 0.29778 | -1795.11131  | -1794.74302                      |        | -1794.81353               |        |
| E + RSH + 2RCOOH - SePPh <sub>2</sub> H                     | 0.43093                                               | 0.31626 | -1995.35744  | -1994.92651                      | -113.1 | -1995.04118               | -110.5 |
| E/J-IM1                                                     | 0.44429                                               | 0.36189 | -2273.04005  | -2272.59576                      |        | -2272.67816               |        |
| E/J-IM1 + 2RCOOH - SePPh <sub>2</sub> H                     | 0.43201                                               | 0.33208 | -1995.36526  | -1994.93325                      | -130.8 | -1995.03317               | -89.5  |
| E/J-TS1                                                     | 0.44146                                               | 0.36449 | -2273.02628  | -2272.58481                      |        | -2272.66178               |        |
| E/J-TS1 + 2RCOOH - SePPh <sub>2</sub> H                     | 0.42919                                               | 0.33469 | -1995.35148  | -1994.92230                      | -102.0 | -1995.01679               | -46.5  |
| E/J-IM2                                                     | 0.44575                                               | 0.36556 | -2273.03756  | -2272.59182                      |        | -2272.67200               |        |
| E/J-IM2 + 2RCOOH - SePPh <sub>2</sub> H                     | 0.43347                                               | 0.33576 | -1995.36277  | -1994.92930                      | -120.4 | -1995.02701               | -73.3  |
| F                                                           | 0.26560                                               | 0.20565 | -1258.51366  | -1258.24806                      |        | -1258.30802               |        |
| F + RSH + HPPH <sub>2</sub> + RCOOH - SePPh <sub>2</sub> H  | 0.42880                                               | 0.31588 | -1995.36562  | -1994.93682                      | -140.1 | -1995.04974               | -133.0 |
| F/K-i-IM1                                                   | 0.34150                                               | 0.26888 | -1736.44428  | -1736.10278                      |        | -1736.17540               |        |
| F/K-i-IM1+ HPPH <sub>2</sub> + RCOOH - SePPh <sub>2</sub> H | 0.42977                                               | 0.33083 | -1995.37531  | -1994.94554                      | -163.0 | -1995.04448               | -119.2 |

Continued

|                                                               |          |          |              |              |        |              |        |
|---------------------------------------------------------------|----------|----------|--------------|--------------|--------|--------------|--------|
| F/K-i-TS1a                                                    | 0.33933  | 0.27243  | -1736.43484  | -1736.09551  |        | -1736.16241  |        |
| F/K-i-TS1a + HPPH <sub>2</sub> + RCOOH - SePPh <sub>2</sub> H | 0.42760  | 0.33438  | -1995.36587  | -1994.93827  | -143.9 | -1995.03149  | -85.1  |
| F/K-i-IM2a                                                    | 0.34474  | 0.27569  | -1736.45269  | -1736.10794  |        | -1736.17699  |        |
| F/K-i-IM2a + HPPH <sub>2</sub> + RCOOH - SePPh <sub>2</sub> H | 0.43302  | 0.33764  | -1995.38371  | -1994.95070  | -176.6 | -1995.04607  | -123.4 |
| F/K-i-TS1b                                                    | 0.33880  | 0.27032  | -1736.41654  | -1736.07774  |        | -1736.14622  |        |
| F/K-i-TS1b + HPPH <sub>2</sub> + RCOOH - SePPh <sub>2</sub> H | 0.42707  | 0.33227  | -1995.34757  | -1994.92049  | -97.3  | -1995.01530  | -42.6  |
| F/K-i-IM2b                                                    | 0.34467  | 0.27413  | -1736.44300  | -1736.09833  |        | -1736.16887  |        |
| F/K-i-IM2b + HPPH <sub>2</sub> + RCOOH - SePPh <sub>2</sub> H | 0.43295  | 0.33608  | -1995.37403  | -1994.94108  | -151.3 | -1995.03795  | -102.1 |
| K-i                                                           | 0.24896  | 0.19022  | -1468.16906  | -1467.92010  |        | -1467.97884  |        |
| K-i + HPPH <sub>2</sub> + 2RCOOH - SePPh <sub>2</sub> H       | 0.42781  | 0.31230  | -1995.37284  | -1994.94503  | -161.7 | -1995.06054  | -161.4 |
| K-i/J-IM1                                                     | 0.440961 | 0.359823 | -2273.049041 | -2272.60808  |        | -2272.689218 |        |
| K-i/J-IM1 + 2RCOOH - SePPh <sub>2</sub> H                     | 0.428684 | 0.330021 | -1995.374247 | -1994.945563 | -163.1 | -1995.044226 | -118.5 |
| K-i/J-TS1                                                     | 0.445045 | 0.366152 | -2273.030107 | -2272.585062 |        | -2272.663955 |        |
| K-i/J-TS1 + 2RCOOH - SePPh <sub>2</sub> H                     | 0.432768 | 0.33635  | -1995.355313 | -1994.922545 | -102.7 | -1995.018963 | -52.2  |
| K-i/J-IM2                                                     | 0.44579  | 0.365049 | -2273.040053 | -2272.594263 |        | -2272.675004 |        |
| K-i/J-IM2 + 2RCOOH - SePPh <sub>2</sub> H                     | 0.433513 | 0.335247 | -1995.36526  | -1994.931747 | -126.8 | -1995.030013 | -81.2  |
| J-ii                                                          | 0.251478 | 0.19299  | -1458.792994 | -1458.541516 |        | -1458.600004 |        |
| J-ii + 2RCOOH                                                 | 0.43263  | 0.313256 | -1995.338498 | -1994.905868 | -58.9  | -1995.025242 | -68.7  |
| G                                                             | 0.36683  | 0.29875  | -1785.73426  | -1785.36743  |        | -1785.43551  |        |
| G + RSH + 2RCOOH - HPPH <sub>2</sub>                          | 0.43178  | 0.31542  | -1995.32212  | -1994.89034  | -18.1  | -1995.00670  | -20.0  |
| G/J-IM1                                                       | 0.44302  | 0.36546  | -2263.66336  | -2263.22034  |        | -2263.29789  |        |
| G/J-IM1 + 2RCOOH - HPPH <sub>2</sub>                          | 0.43304  | 0.33385  | -1995.33029  | -1994.89725  | -36.3  | -1994.99644  | 6.9    |
| G/J-TS1                                                       | 0.43982  | 0.36361  | -2263.63339  | -2263.19357  |        | -2263.26977  |        |
| G/J-TS1 + 2RCOOH - HPPH <sub>2</sub>                          | 0.42985  | 0.33200  | -1995.30032  | -1994.87047  | 34.0   | -1994.96832  | 80.8   |
| G/J-IM2                                                       | 0.44367  | 0.36461  | -2263.67738  | -2263.23371  |        | -2263.31276  |        |
| G/J-IM2 + 2RCOOH - HPPH <sub>2</sub>                          | 0.43369  | 0.33300  | -1995.34431  | -1994.91062  | -71.4  | -1995.01131  | -32.1  |



**Table S10.** The zero-point energies (*ZPE*, hartree), thermal correction to Gibbs free energy (*G<sub>0</sub>*, hartree) of various species calculated at the B3LYP/6-31++G(d, p), SDD level in the gas phase under atmospheric pressure and room temperature (298.15 K and 1 atm). Polarizable continuum model correction energies (*PCM-E*, hartree), total energies (*E<sub>c</sub>*, hartree) corrected by *ZPE*, sum of electronic and thermal free energies (*G<sub>c</sub>*, hartree) corrected by *G<sub>0</sub>*, relative energies (*E<sub>r</sub>*, kJ mol<sup>-1</sup>) and relative Gibbs free energies (*G<sub>r</sub>*, kJ mol<sup>-1</sup>) to Cd(OA)<sub>2</sub> + 2SePPh<sub>2</sub>H + RSH for all the species in the reaction of Cd(OA)<sub>2</sub> + 2SePPh<sub>2</sub>H + RSH → K + HPPPh<sub>2</sub> + 2RCOOH (F + RSH + SePPh<sub>2</sub>H → K + RCOOH, K-i → K, and E-i + RSH → K + HPPPh<sub>2</sub>) calculated at the M06//B3LYP/6-31++G(d, p), SDD level in 1-octadecene solution under room temperature and atmospheric pressure (298.15 K and 1 atm).

| Species                                           | M06//B3LYP/6-31++G(d, p), SDD<br>(298.15 K and 1 atm) |                      |              |                                                    |                      |                                                              |                      |
|---------------------------------------------------|-------------------------------------------------------|----------------------|--------------|----------------------------------------------------|----------------------|--------------------------------------------------------------|----------------------|
|                                                   | <i>ZPE</i>                                            | <i>G<sub>0</sub></i> | <i>PCM-E</i> | <i>E<sub>c</sub></i> ( <i>PCM-E</i> + <i>ZPE</i> ) | <i>E<sub>r</sub></i> | <i>G<sub>c</sub></i> ( <i>PCM-E</i> + <i>G<sub>0</sub></i> ) | <i>G<sub>r</sub></i> |
| Cd(OA) <sub>2</sub>                               | 0.15896                                               | 0.11333              | -703.16954   | -703.01058                                         |                      | -703.05621                                                   |                      |
| SePPh <sub>2</sub> H                              | 0.19343                                               | 0.15007              | -814.22030   | -814.02687                                         |                      | -814.07023                                                   |                      |
| HPPPh <sub>2</sub>                                | 0.19113                                               | 0.15188              | -804.87857   | -804.68745                                         |                      | -804.72669                                                   |                      |
| RSH                                               | 0.07493                                               | 0.04829              | -477.92093   | -477.84600                                         |                      | -477.87264                                                   |                      |
| RCOOH                                             | 0.09058                                               | 0.06013              | -268.27275   | -268.18218                                         |                      | -268.21262                                                   |                      |
| Cd(OA) <sub>2</sub> + 2SePPh <sub>2</sub> H + RSH | 0.62075                                               | 0.46175              | -2809.53106  | -2808.91031                                        | 0.0                  | -2809.06931                                                  | 0.0                  |
| F                                                 | 0.26560                                               | 0.20565              | -1258.51366  | -1258.24806                                        |                      | -1258.30802                                                  |                      |
| F + RSH + DPP + RCOOH                             | 0.62223                                               | 0.46595              | -2809.58592  | -2808.96368                                        | -140.1               | -2809.11997                                                  | -133.0               |
| F/K-i-IM1                                         | 0.34150                                               | 0.26888              | -1736.44428  | -1736.10278                                        |                      | -1736.17540                                                  |                      |
| F/K-i-IM1 + DPP + RCOOH                           | 0.62320                                               | 0.48090              | -2809.59560  | -2808.97240                                        | -163.0               | -2809.11471                                                  | -119.2               |
| F/K-TS1                                           | 0.33822                                               | 0.26821              | -1736.40082  | -1736.06260                                        |                      | -1736.13261                                                  |                      |
| F/K-TS1 + DPP + RCOOH                             | 0.61992                                               | 0.48023              | -2809.55214  | -2808.93222                                        | -57.5                | -2809.07192                                                  | -6.8                 |
| F/K-IM2                                           | 0.34374                                               | 0.27029              | -1736.42153  | -1736.07779                                        |                      | -1736.15124                                                  |                      |
| F/K-IM2 + DPP + RCOOH                             | 0.62544                                               | 0.48231              | -2809.57286  | -2808.94741                                        | -97.4                | -2809.09054                                                  | -55.8                |
| K-ii                                              | 0.25233                                               | 0.18874              | -1468.13749  | -1467.88516                                        |                      | -1467.94875                                                  |                      |
| K-ii + DPP + 2RCOOH                               | 0.62461                                               | 0.46089              | -2809.56156  | -2808.93696                                        | -70.0                | -2809.10068                                                  | -82.4                |
| K                                                 | 0.25230                                               | 0.19078              | -1468.14263  | -1467.89033                                        |                      | -1467.95185                                                  |                      |
| K + DPP + 2RCOOH                                  | 0.62458                                               | 0.46293              | -2809.56671  | -2808.94212                                        | -83.5                | -2809.10378                                                  | -90.5                |
| K-i                                               | 0.24896                                               | 0.19022              | -1468.16906  | -1467.92010                                        |                      | -1467.97884                                                  |                      |
| K-i + DPP + 2RCOOH                                | 0.62124                                               | 0.46237              | -2809.59314  | -2808.97190                                        | -161.7               | -2809.13077                                                  | -161.4               |
| K-i/K-TS1                                         | 0.25238                                               | 0.19501              | -1468.10638  | -1467.85400                                        |                      | -1467.91137                                                  |                      |
| K-i/K-TS1 + DPP + 2RCOOH                          | 0.62466                                               | 0.46716              | -2809.53046  | -2808.90580                                        | 11.8                 | -2809.06330                                                  | 15.8                 |
| E-i                                               | 0.36870                                               | 0.29776              | -1795.10594  | -1794.73724                                        |                      | -1794.80818                                                  |                      |
| E-i + RSH + 2RCOOH                                | 0.62478                                               | 0.46632              | -2809.57237  | -2808.94759                                        | -97.9                | -2809.10606                                                  | -96.5                |
| E-i/K-IM1                                         | 0.44480                                               | 0.36408              | -2273.03773  | -2272.59293                                        |                      | -2272.67364                                                  |                      |
| E-i/K-IM1 + 2RCOOH                                | 0.62595                                               | 0.48435              | -2809.58323  | -2808.95728                                        | -123.3               | -2809.09888                                                  | -77.6                |
| E-i/K-TS1                                         | 0.44115                                               | 0.36243              | -2272.99268  | -2272.55153                                        |                      | -2272.63026                                                  |                      |
| E-i/K-TS1 + 2RCOOH                                | 0.62230                                               | 0.48269              | -2809.53819  | -2808.91588                                        | -14.6                | -2809.05550                                                  | 36.3                 |
| E-i/K-IM2                                         | 0.44477                                               | 0.36142              | -2273.02254  | -2272.57777                                        |                      | -2272.66112                                                  |                      |
| E-i/K-IM2 + 2RCOOH                                | 0.62592                                               | 0.48169              | -2809.56804  | -2808.94212                                        | -83.5                | -2809.08635                                                  | -44.8                |

**Table S11.** The zero-point energies (*ZPE*, hartree), thermal correction to Gibbs free energy (*G<sub>0</sub>*, hartree) of various species calculated at the B3LYP/6-31++G(d, p), SDD level in the gas phase under atmospheric pressure and room temperature (298.15 K and 1 atm). Polarizable continuum model correction energies (*PCM-E*, hartree), total energies (*E<sub>c</sub>*, hartree) corrected by *ZPE*, sum of electronic and thermal free energies (*G<sub>c</sub>*, hartree) corrected by *G<sub>0</sub>*, relative energies (*E<sub>r</sub>*, kJ mol<sup>-1</sup>) and relative Gibbs free energies (*G<sub>r</sub>*, kJ mol<sup>-1</sup>) to Cd(OA)<sub>2</sub> + SePPh<sub>2</sub>H + ROH for all the species in the reaction of Cd(OA)<sub>2</sub> + SePPh<sub>2</sub>H + ROH → **M** + 2RCOOH (**C** + ROH → **M** + RCOOH, **E** + ROH → **M** + SePPh<sub>2</sub>H, **F** + ROH + HPPH<sub>2</sub> → **M** + RCOOH + SePPh<sub>2</sub>H, and **G** + ROH → **M** + HPPH<sub>2</sub>) calculated at the M06//B3LYP/6-31++G(d, p), SDD level in 1-octadecene solution under room temperature and atmospheric pressure (298.15 K and 1 atm).

| Species                                                           | M06//B3LYP/6-31++G(d, p), SDD<br>(298.15 K and 1 atm) |                      |              |                                                    |                      |                                                              |                      |
|-------------------------------------------------------------------|-------------------------------------------------------|----------------------|--------------|----------------------------------------------------|----------------------|--------------------------------------------------------------|----------------------|
|                                                                   | <i>ZPE</i>                                            | <i>G<sub>0</sub></i> | <i>PCM-E</i> | <i>E<sub>c</sub></i> ( <i>PCM-E</i> + <i>ZPE</i> ) | <i>E<sub>r</sub></i> | <i>G<sub>c</sub></i> ( <i>PCM-E</i> + <i>G<sub>0</sub></i> ) | <i>G<sub>r</sub></i> |
| Cd(OA) <sub>2</sub>                                               | 0.15896                                               | 0.11333              | -703.16954   | -703.01058                                         |                      | -703.05621                                                   |                      |
| SePPh <sub>2</sub> H                                              | 0.19343                                               | 0.15007              | -814.22030   | -814.02687                                         |                      | -814.07023                                                   |                      |
| HPPH <sub>2</sub>                                                 | 0.19113                                               | 0.15188              | -804.87857   | -804.68745                                         |                      | -804.72669                                                   |                      |
| ROH                                                               | 0.07988                                               | 0.05449              | -154.95830   | -154.87842                                         |                      | -154.90381                                                   |                      |
| RCOOH                                                             | 0.09058                                               | 0.06013              | -268.27275   | -268.18218                                         |                      | -268.21262                                                   |                      |
| Cd(OA) <sub>2</sub> + SePPh <sub>2</sub> H + ROH                  | 0.43227                                               | 0.31789              | -1672.34814  | -1671.91587                                        | 0.0                  | -1672.03025                                                  | 0.0                  |
| <b>C</b>                                                          | 0.26354                                               | 0.20472              | -1249.14001  | -1248.87647                                        |                      | -1248.93529                                                  |                      |
| <b>C</b> + ROH + RCOOH                                            | 0.43399                                               | 0.31935              | -1672.37106  | -1671.93707                                        | -55.7                | -1672.05171                                                  | -56.4                |
| <b>C</b> /M-IM1                                                   | 0.34533                                               | 0.27872              | -1404.11054  | -1403.76521                                        |                      | -1403.83182                                                  |                      |
| <b>C</b> /M-IM1 + RCOOH                                           | 0.43591                                               | 0.33886              | -1672.38329  | -1671.94738                                        | -82.7                | -1672.04444                                                  | -37.2                |
| <b>C</b> /M-TS1                                                   | 0.34064                                               | 0.27374              | -1404.07179  | -1403.73115                                        |                      | -1403.79805                                                  |                      |
| <b>C</b> /M-TS1 + RCOOH                                           | 0.43121                                               | 0.33387              | -1672.34454  | -1671.91333                                        | 6.7                  | -1672.01067                                                  | 51.4                 |
| <b>C</b> /M-IM2                                                   | 0.34469                                               | 0.27641              | -1404.07649  | -1403.73180                                        |                      | -1403.80008                                                  |                      |
| <b>C</b> /M-IM2 + RCOOH                                           | 0.43527                                               | 0.33654              | -1672.34924  | -1671.91398                                        | 5.0                  | -1672.01270                                                  | 46.1                 |
| <b>M</b>                                                          | 0.25335                                               | 0.19864              | -1135.79829  | -1135.54493                                        |                      | -1135.59965                                                  |                      |
| <b>M</b> + 2RCOOH                                                 | 0.43451                                               | 0.31890              | -1672.34379  | -1671.90928                                        | 17.3                 | -1672.02489                                                  | 14.1                 |
| <b>E</b>                                                          | 0.36828                                               | 0.29778              | -1795.11131  | -1794.74302                                        |                      | -1794.81353                                                  |                      |
| <b>E</b> + ROH + 2RCOOH - SePPh <sub>2</sub> H                    | 0.43588                                               | 0.32247              | -1672.39481  | -1671.95893                                        | -113.1               | -1672.07235                                                  | -110.5               |
| <b>E</b> /M-IM1                                                   | 0.44980                                               | 0.36855              | -1950.07654  | -1949.62674                                        |                      | -1949.70798                                                  |                      |
| <b>E</b> /M-IM1 + 2RCOOH - SePPh <sub>2</sub> H                   | 0.43752                                               | 0.33875              | -1672.40174  | -1671.96422                                        | -126.9               | -1672.06299                                                  | -86.0                |
| <b>E</b> /M-TS1                                                   | 0.44589                                               | 0.36842              | -1950.04389  | -1949.59800                                        |                      | -1949.67547                                                  |                      |
| <b>E</b> /M-TS1 + 2RCOOH - SePPh <sub>2</sub> H                   | 0.43362                                               | 0.33862              | -1672.36910  | -1671.93548                                        | -51.5                | -1672.03048                                                  | -0.6                 |
| <b>E</b> /M-IM2                                                   | 0.44693                                               | 0.36802              | -1950.04375  | -1949.59682                                        |                      | -1949.67572                                                  |                      |
| <b>E</b> /M-IM2 + 2RCOOH - SePPh <sub>2</sub> H                   | 0.43465                                               | 0.33822              | -1672.36895  | -1671.93430                                        | -48.4                | -1672.03073                                                  | -1.3                 |
| <b>F</b>                                                          | 0.26560                                               | 0.20565              | -1258.51366  | -1258.24806                                        |                      | -1258.30802                                                  |                      |
| <b>F</b> + ROH + HPPH <sub>2</sub> + RCOOH - SePPh <sub>2</sub> H | 0.43375                                               | 0.32209              | -1672.40299  | -1671.96924                                        | -140.1               | -1672.08091                                                  | -133.0               |
| <b>F</b> /N-i-IM1                                                 | 0.34682                                               | 0.27612              | -1413.48058  | -1413.13376                                        |                      | -1413.20447                                                  |                      |

## Continued

---

|                                                              |         |         |             |             |        |             |        |
|--------------------------------------------------------------|---------|---------|-------------|-------------|--------|-------------|--------|
| F/N-i-IM1+ HPPH <sub>2</sub> + RCOOH - SePPh <sub>2</sub> H  | 0.43509 | 0.33806 | -1672.41161 | -1671.97651 | -159.2 | -1672.07354 | -113.7 |
| F/N-i-TS1                                                    | 0.34285 | 0.27530 | -1413.44702 | -1413.10417 |        | -1413.17172 |        |
| F/N-i-TS1 + HPPH <sub>2</sub> + RCOOH - SePPh <sub>2</sub> H | 0.43113 | 0.33725 | -1672.37805 | -1671.94692 | -81.5  | -1672.04080 | -27.7  |
| F/N-i-IM2                                                    | 0.34619 | 0.27677 | -1413.44944 | -1413.10324 |        | -1413.17266 |        |
| F/N-i-IM2 + HPPH <sub>2</sub> + RCOOH - SePPh <sub>2</sub> H | 0.43447 | 0.33872 | -1672.38046 | -1671.94599 | -79.1  | -1672.04174 | -30.2  |
| N-i                                                          | 0.25513 | 0.19667 | -1145.16894 | -1144.91382 |        | -1144.97228 |        |
| N-i + HPPH <sub>2</sub> + 2RCOOH - SePPh <sub>2</sub> H      | 0.43398 | 0.31875 | -1672.37272 | -1671.93875 | -60.1  | -1672.05397 | -62.3  |
| N-i/J-IM1                                                    | 0.44291 | 0.36542 | -1950.05315 | -1949.61024 |        | -1949.68773 |        |
| N-i/J-IM1 + 2RCOOH - SePPh <sub>2</sub> H                    | 0.43064 | 0.33562 | -1672.37836 | -1671.94772 | -83.6  | -1672.04274 | -32.8  |
| N-i/J-TS1                                                    | 0.44695 | 0.37067 | -1950.03166 | -1949.58472 |        | -1949.66099 |        |
| N-i/J-TS1 + 2RCOOH - SePPh <sub>2</sub> H                    | 0.43467 | 0.34087 | -1672.35687 | -1671.92220 | -16.6  | -1672.01600 | 37.4   |
| N-i/J-IM2                                                    | 0.44728 | 0.36701 | -1950.04426 | -1949.59698 |        | -1949.67725 |        |
| N-i/J-IM2 + 2RCOOH - SePPh <sub>2</sub> H                    | 0.43500 | 0.33721 | -1672.36947 | -1671.93447 | -48.8  | -1672.03226 | -5.3   |
| M-ii                                                         | 0.25340 | 0.19727 | -1135.79483 | -1135.54143 |        | -1135.59756 |        |
| M-ii + 2RCOOH                                                | 0.43455 | 0.31753 | -1672.34033 | -1671.90578 | 26.5   | -1672.02280 | 19.6   |
| G                                                            | 0.36683 | 0.29875 | -1785.73426 | -1785.36743 |        | -1785.43551 |        |
| G + ROH + 2RCOOH - HPPH <sub>2</sub>                         | 0.43673 | 0.32162 | -1672.35949 | -1671.92276 | -18.1  | -1672.03787 | -20.0  |
| G/M-IM1                                                      | 0.44845 | 0.37289 | -1940.69941 | -1940.25096 |        | -1940.32652 |        |
| G/M-IM1 + 2RCOOH - HPPH <sub>2</sub>                         | 0.43848 | 0.34127 | -1672.36634 | -1671.92786 | -31.5  | -1672.02507 | 13.6   |
| G/M-TS1                                                      | 0.44247 | 0.36821 | -1940.65214 | -1940.20967 |        | -1940.28393 |        |
| G/M-TS1 + 2RCOOH - HPPH <sub>2</sub>                         | 0.43250 | 0.33659 | -1672.31907 | -1671.88657 | 76.9   | -1671.98248 | 125.4  |
| G/M-IM2                                                      | 0.44559 | 0.36928 | -1940.68063 | -1940.23505 |        | -1940.31135 |        |
| G/M-IM2 + 2RCOOH - HPPH <sub>2</sub>                         | 0.43561 | 0.33766 | -1672.34757 | -1671.91195 | 10.3   | -1672.00990 | 53.4   |

---

**Table S12.** The zero-point energies (*ZPE*, hartree), thermal correction to Gibbs free energy (*G<sub>0</sub>*, hartree) of various species calculated at the B3LYP/6-31++G(d, p), SDD level in the gas phase under atmospheric pressure and room temperature (298.15 K and 1 atm). Polarizable continuum model correction energies (*PCM-E*, hartree), total energies (*E<sub>c</sub>*, hartree) corrected by *ZPE*, sum of electronic and thermal free energies (*G<sub>c</sub>*, hartree) corrected by *G<sub>0</sub>*, relative energies (*E<sub>r</sub>*, kJ mol<sup>-1</sup>) and relative Gibbs free energies (*G<sub>r</sub>*, kJ mol<sup>-1</sup>) to Cd(OA)<sub>2</sub> + 2SePPh<sub>2</sub>H + ROH for all the species in the reaction of Cd(OA)<sub>2</sub> + 2SePPh<sub>2</sub>H + ROH → **N** + HPPH<sub>2</sub> + 2RCOOH (**N-i** → **N** and **E-i** + ROH → **N** + HPPH<sub>2</sub>) calculated at the M06//B3LYP/6-31++G(d, p), SDD level in 1-octadecene solution under room temperature and atmospheric pressure (298.15 K and 1 atm).

| Species                                           | M06//B3LYP/6-31++G(d, p), SDD<br>(298.15 K and 1 atm) |                      |              |                                                    |                      |                                                              |                      |
|---------------------------------------------------|-------------------------------------------------------|----------------------|--------------|----------------------------------------------------|----------------------|--------------------------------------------------------------|----------------------|
|                                                   | <i>ZPE</i>                                            | <i>G<sub>0</sub></i> | <i>PCM-E</i> | <i>E<sub>c</sub></i> ( <i>PCM-E</i> + <i>ZPE</i> ) | <i>E<sub>r</sub></i> | <i>G<sub>c</sub></i> ( <i>PCM-E</i> + <i>G<sub>0</sub></i> ) | <i>G<sub>r</sub></i> |
| Cd(OA) <sub>2</sub>                               | 0.15896                                               | 0.11333              | -703.16954   | -703.01058                                         |                      | -703.05621                                                   |                      |
| SePPh <sub>2</sub> H                              | 0.19343                                               | 0.15007              | -814.22030   | -814.02687                                         |                      | -814.07023                                                   |                      |
| HPPH <sub>2</sub>                                 | 0.19113                                               | 0.15188              | -804.87857   | -804.68745                                         |                      | -804.72669                                                   |                      |
| ROH                                               | 0.07988                                               | 0.05449              | -154.95830   | -154.87842                                         |                      | -154.90381                                                   |                      |
| RCOOH                                             | 0.09058                                               | 0.06013              | -268.27275   | -268.18218                                         |                      | -268.21262                                                   |                      |
| Cd(OA) <sub>2</sub> + 2SePPh <sub>2</sub> H + ROH | 0.62570                                               | 0.46795              | -2486.56843  | -2485.94274                                        | 0.0                  | -2486.10048                                                  | 0.0                  |
| <b>N-i</b>                                        | 0.25513                                               | 0.19667              | -1145.16894  | -1144.91382                                        |                      | -1144.97228                                                  |                      |
| <b>N-i</b> + DPP + 2RCOOH                         | 0.62741                                               | 0.46882              | -2486.59302  | -2485.96562                                        | -60.1                | -2486.12420                                                  | -62.3                |
| <b>N-i/N-TS1</b>                                  | 0.25400                                               | 0.19708              | -1145.10245  | -1144.84844                                        |                      | -1144.90537                                                  |                      |
| <b>N-i/N-TS1</b> + DPP + 2RCOOH                   | 0.62628                                               | 0.46923              | -2486.52652  | -2485.90024                                        | 111.6                | -2486.05730                                                  | 113.4                |
| <b>N-ii</b>                                       | 0.25436                                               | 0.19573              | -1145.13322  | -1144.87887                                        |                      | -1144.93749                                                  |                      |
| <b>N-ii</b> + DPP + 2RCOOH                        | 0.62664                                               | 0.46788              | -2486.55730  | -2485.93067                                        | 31.7                 | -2486.08942                                                  | 29.0                 |
| <b>N</b>                                          | 0.25447                                               | 0.19431              | -1145.13755  | -1144.88308                                        |                      | -1144.94323                                                  |                      |
| <b>N</b> + DPP + 2RCOOH                           | 0.62675                                               | 0.46646              | -2486.56162  | -2485.93488                                        | 20.6                 | -2486.09516                                                  | 14.0                 |
| <b>E-i</b>                                        | 0.36870                                               | 0.29776              | -1795.10594  | -1794.73724                                        |                      | -1794.80818                                                  |                      |
| <b>E-i</b> + ROH + 2RCOOH                         | 0.62972                                               | 0.47252              | -2486.60974  | -2485.98002                                        | -97.9                | -2486.13722                                                  | -96.5                |
| <b>E-i/N-IM1</b>                                  | 0.44962                                               | 0.36739              | -1950.07413  | -1949.62451                                        |                      | -1949.70674                                                  |                      |
| <b>E-i/N-IM1</b> + 2RCOOH                         | 0.63077                                               | 0.48766              | -2486.61964  | -2485.98887                                        | -121.1               | -2486.13198                                                  | -82.7                |
| <b>E-i/N-TS1</b>                                  | 0.44481                                               | 0.36765              | -1950.00295  | -1949.55813                                        |                      | -1949.63530                                                  |                      |
| <b>E-i/N-TS1</b> + 2RCOOH                         | 0.62596                                               | 0.48791              | -2486.54845  | -2485.92249                                        | 53.2                 | -2486.06054                                                  | 104.9                |
| <b>E-i/N-IM2</b>                                  | 0.44707                                               | 0.36567              | -1950.01915  | -1949.57208                                        |                      | -1949.65348                                                  |                      |
| <b>E-i/N-IM2</b> + 2RCOOH                         | 0.62822                                               | 0.48594              | -2486.56465  | -2485.93643                                        | 16.6                 | -2486.07872                                                  | 57.1                 |

**Table S13.** Selected bond lengths (in Å), bond angles (in degree), the number of basis functions, and the number of primitive Gaussians of RCOOCdSe–PPh<sub>2</sub> species optimized using B3LYP or BPW91 functionals with SDD, cc-pVDZ-pp, or cc-pVTZ-pp basis sets.

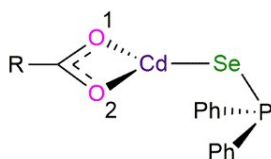

| Levels                         | O1–Cd | O2–Cd | Cd–Se | Se–P  | ∠O1–<br>Cd–Se | ∠O2–<br>Cd–Se | ∠Cd–<br>Se–P | basis<br>functions | primitive<br>Gaussians |
|--------------------------------|-------|-------|-------|-------|---------------|---------------|--------------|--------------------|------------------------|
| B3LYP/6-31++G(d,p), SDD        | 2.253 | 2.285 | 2.515 | 2.347 | 149.6         | 152.0         | 102.4        | 465                | 804                    |
| B3LYP/6-31++G(d,p), cc-pVDZ-pp | 2.250 | 2.291 | 2.498 | 2.310 | 150.7         | 150.8         | 102.2        | 479                | 940                    |
| B3LYP/6-31++G(d,p), cc-pVTZ-pp | 2.240 | 2.285 | 2.490 | 2.302 | 151.0         | 150.4         | 102.6        | 520                | 1079                   |
| BPW91/6-31++G(d,p), cc-pVDZ-pp | 2.272 | 2.293 | 2.498 | 2.305 | 149.0         | 152.2         | 101.8        | 479                | 940                    |
| BPW91/6-31++G(d,p), cc-pVTZ-pp | 2.261 | 2.288 | 2.488 | 2.297 | 149.2         | 151.8         | 102.4        | 520                | 1079                   |

From Table S13, there are only less than 0.045 Å differences in bond length and about 0.4 degree in bond angle between B3LYP/6-31++G(d,p), SDD and BPW91/6-31++G(d,p), cc-pVTZ-pp. It is indicated that the present B3LYP/6-31++G(d,p), SDD level is appropriate for the present reaction system.

Furthermore, the numbers of basis functions and primitive Gaussian functions are 465 and 864 for [6-31++G(d,p), SDD] basis set, and are 520 and 1079 for [6-31++G(d,p), cc-pVTZ-pp] basis set, respectively. To save computational time, the comparatively small basis set [6-31++G(d,p), SDD] is preferred in the present study.

### Descriptions for the turnover frequency (TOF) of the catalytic cycle and rate constants $k(T)$

The turnover frequency (TOF) of the catalytic cycle determines the efficiency of the catalyst. Based on the transition state theory (TST),<sup>8, 9</sup> TOF can be calculated by eqs i and ii,<sup>10-12</sup> in which  $\delta E$  (the energetic span<sup>13</sup>) is defined as the energy difference between the summit and trough of the catalytic cycle.

$$\text{TOF} = \frac{k_B T}{h} e^{-\frac{\delta E}{RT}} \quad (\text{i})$$

$$\delta E = \begin{cases} G_{\text{TDS}} - G_{\text{TDI}} & \text{if TDS appears after TDI} \\ G_{\text{TDS}} - G_{\text{TDI}} + \Delta G_r & \text{if TDS appears before TDI} \end{cases} \quad (\text{ii})$$

where  $k_B$  is the Boltzmann constant,  $T$  is the absolute temperature, and  $h$  is the Planck constant.  $G_{\text{TDS}}$  and  $G_{\text{TDI}}$  are the Gibbs free energies of the TOF-determining transition state (TDS) and the TOF-determining intermediate (TDI), and  $\Delta G_r$  is the global free energy of the entire cycle.

The rate constants  $k(T)$  have been evaluated according to conventional transition state theory (TST)  $k'(T)$ , including tunneling correction  $\kappa(T)$  based on Wigner's formulation as follows:<sup>8, 9</sup>

$$k'(T) = \frac{k_B T}{h c^0} e^{-\frac{\Delta G^\ddagger}{k_B T}} \quad (\text{iii})$$

$$\kappa(T) = 1 + \frac{1}{24} \left| \frac{h \omega^\ddagger}{k_B T} \right|^2 \quad (\text{iv})$$

$$k(T) = \kappa(T) k'(T) \quad (\text{v})$$

where  $k_B$  is the Boltzmann constant,  $T$  is the absolute temperature,  $h$  is the Planck constant,  $c^0$  is the standard concentration ( $1 \text{ mol dm}^{-3}$ ),  $\Delta G^\ddagger$  is the activation Gibbs free energy barrier, and  $\omega^\ddagger$  is the imaginary frequency of TS.

**Snapshot and standard orientation of all the species in the gas phase calculated at the B3LYP/6-31++G(d, p), SDD level. Distance lengths are reported in Å.**

Cd(OA)<sub>2</sub>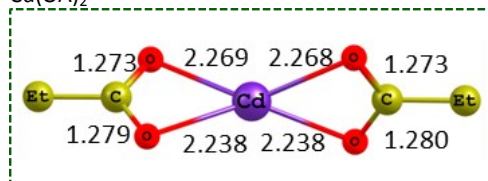

|    |             |             |             |
|----|-------------|-------------|-------------|
| Cd | 0.00019200  | -0.19527000 | 0.00561900  |
| O  | -2.01693100 | 0.54343300  | -0.72606600 |
| O  | -1.89855100 | -0.82833100 | 1.00721500  |
| C  | -2.59113400 | -0.12964300 | 0.18946900  |
| C  | -4.10111300 | -0.14244500 | 0.31582400  |
| H  | -4.42769900 | -1.11683800 | -0.07236200 |
| H  | -4.33800400 | -0.15651700 | 1.38467200  |
| C  | -4.81776500 | 0.99626700  | -0.41224400 |
| H  | -5.90143900 | 0.89458800  | -0.29523300 |
| H  | -4.52262200 | 1.97044800  | -0.01058100 |
| H  | -4.58147200 | 0.99294200  | -1.47936300 |
| O  | 2.00009900  | 0.74006300  | 0.52602100  |
| O  | 1.91279800  | -1.01990800 | -0.81391200 |
| C  | 2.58917400  | -0.12440100 | -0.19911900 |
| C  | 4.09618100  | -0.11452200 | -0.35804600 |
| H  | 4.29421700  | -0.01905700 | -1.43292300 |
| H  | 4.44727400  | -1.11759900 | -0.08737300 |
| C  | 4.82515100  | 0.96746200  | 0.43942200  |
| H  | 4.64867800  | 0.85535700  | 1.51287300  |
| H  | 5.90332200  | 0.90456900  | 0.26008100  |
| H  | 4.48622100  | 1.96669100  | 0.15259500  |

RSH

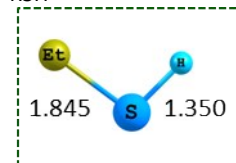

|   |             |             |             |
|---|-------------|-------------|-------------|
| C | -1.65187300 | -0.35211900 | -0.05355800 |
| H | -1.62605200 | -1.10588400 | 0.74074800  |
| H | -1.60259600 | -0.87316100 | -1.01422600 |
| H | -2.61586600 | 0.16750500  | 0.00995200  |
| C | -0.50485000 | 0.64488200  | 0.09148000  |
| H | -0.54210400 | 1.39746100  | -0.70193400 |
| H | -0.55876700 | 1.17787400  | 1.04503000  |
| S | 1.17483500  | -0.09909600 | -0.08018700 |
| H | 1.08836000  | -0.93484300 | 0.97589700  |

ROH

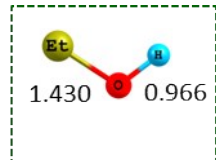

|   |             |             |             |
|---|-------------|-------------|-------------|
| C | -1.21816400 | -0.24157300 | -0.02147900 |
| H | -1.28417100 | -0.96277100 | 0.80271400  |
| H | -1.28245900 | -0.79362600 | -0.96448100 |
| H | -2.08576300 | 0.42470400  | 0.05147700  |
| C | 0.07984400  | 0.55710700  | 0.04725400  |
| H | 0.12794900  | 1.27982100  | -0.77264900 |
| H | 0.13135300  | 1.12419300  | 0.98908100  |
| H | 1.26905000  | -0.90511600 | 0.60810400  |
| O | 1.24424600  | -0.25755100 | -0.10861200 |

(RSH)Cd(OA)<sub>2</sub>

|    |             |             |             |
|----|-------------|-------------|-------------|
| Cd | -0.00733200 | -0.27107700 | -0.07410600 |
| O  | 2.04708500  | -1.05611500 | -0.78776600 |
| O  | 1.79932100  | -0.38348700 | 1.31104200  |
| C  | 2.52281100  | -0.86888100 | 0.37601500  |
| C  | 3.96469800  | -1.22839000 | 0.69099000  |
| H  | 4.41337800  | -0.35547500 | 1.17998800  |
| H  | 3.92658700  | -2.00545900 | 1.46507700  |
| C  | 4.79588800  | -1.68872900 | -0.50713500 |
| H  | 5.81312000  | -1.94065000 | -0.18894700 |
| H  | 4.35314300  | -2.56997500 | -0.97919700 |
| H  | 4.85966800  | -0.90684100 | -1.26981600 |
| O  | -1.89540400 | -1.46241300 | -0.37698700 |
| O  | -2.09954600 | 0.41600600  | 0.78458800  |
| C  | -2.61150900 | -0.63170900 | 0.27679700  |
| C  | -4.09648100 | -0.89184200 | 0.46536000  |
| H  | -4.62085000 | 0.01712400  | 0.14653700  |
| H  | -4.26352300 | -0.95808300 | 1.54796900  |
| C  | -4.63946900 | -2.12852400 | -0.25168100 |
| H  | -4.12906600 | -3.03534800 | 0.08401300  |
| H  | -5.71074500 | -2.24144100 | -0.05374500 |
| H  | -4.49651300 | -2.05398500 | -1.33360500 |
| C  | 0.54219500  | 3.31430700  | 1.19780000  |
| H  | 1.49864600  | 3.72591400  | 0.85722600  |
| H  | 0.72853100  | 2.32559300  | 1.62661200  |
| H  | 0.16500000  | 3.96394500  | 1.99569000  |
| C  | -0.48128200 | 3.26501200  | 0.06805100  |
| H  | -1.43194500 | 2.84784400  | 0.40968200  |
| H  | -0.66260600 | 4.25536100  | -0.35662500 |
| S  | -0.01182000 | 2.15857200  | -1.34554500 |
| H  | 1.30549700  | 2.44660500  | -1.38921700 |

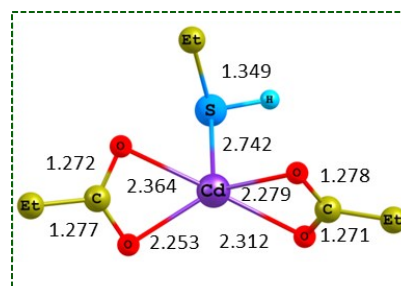

|    |             |             |             |
|----|-------------|-------------|-------------|
| Cd | -0.00733200 | -0.27107700 | -0.07410600 |
| O  | 2.04708500  | -1.05611500 | -0.78776600 |
| O  | 1.79932100  | -0.38348700 | 1.31104200  |
| C  | 2.52281100  | -0.86888100 | 0.37601500  |
| C  | 3.96469800  | -1.22839000 | 0.69099000  |
| H  | 4.41337800  | -0.35547500 | 1.17998800  |
| H  | 3.92658700  | -2.00545900 | 1.46507700  |
| C  | 4.79588800  | -1.68872900 | -0.50713500 |
| H  | 5.81312000  | -1.94065000 | -0.18894700 |
| H  | 4.35314300  | -2.56997500 | -0.97919700 |
| H  | 4.85966800  | -0.90684100 | -1.26981600 |
| O  | -1.89540400 | -1.46241300 | -0.37698700 |
| O  | -2.09954600 | 0.41600600  | 0.78458800  |
| C  | -2.61150900 | -0.63170900 | 0.27679700  |
| C  | -4.09648100 | -0.89184200 | 0.46536000  |
| H  | -4.62085000 | 0.01712400  | 0.14653700  |
| H  | -4.26352300 | -0.95808300 | 1.54796900  |
| C  | -4.63946900 | -2.12852400 | -0.25168100 |
| H  | -4.12906600 | -3.03534800 | 0.08401300  |
| H  | -5.71074500 | -2.24144100 | -0.05374500 |
| H  | -4.49651300 | -2.05398500 | -1.33360500 |
| C  | 0.54219500  | 3.31430700  | 1.19780000  |
| H  | 1.49864600  | 3.72591400  | 0.85722600  |
| H  | 0.72853100  | 2.32559300  | 1.62661200  |
| H  | 0.16500000  | 3.96394500  | 1.99569000  |
| C  | -0.48128200 | 3.26501200  | 0.06805100  |
| H  | -1.43194500 | 2.84784400  | 0.40968200  |
| H  | -0.66260600 | 4.25536100  | -0.35662500 |
| S  | -0.01182000 | 2.15857200  | -1.34554500 |
| H  | 1.30549700  | 2.44660500  | -1.38921700 |

(RSH)<sub>2</sub>Cd(OA)<sub>2</sub>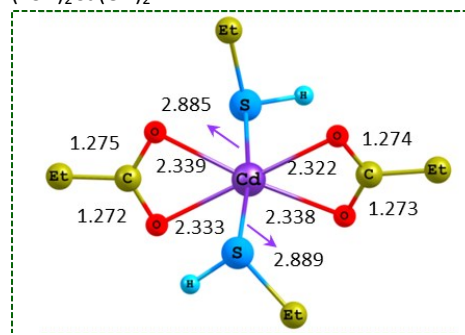

|    |             |             |             |
|----|-------------|-------------|-------------|
| Cd | -0.08654500 | 0.01944500  | 0.04676000  |
| O  | 2.03720900  | -0.07926900 | -0.92701000 |
| O  | 1.83872800  | 0.73953400  | 1.12660300  |
| C  | 2.55266300  | 0.43606100  | 0.11620200  |
| C  | 4.04938100  | 0.70378700  | 0.18394300  |
| H  | 4.16972800  | 1.75938300  | 0.45685600  |
| H  | 4.43188600  | 0.14064900  | 1.04467200  |
| C  | 4.83240300  | 0.36859400  | -1.08609100 |
| H  | 5.89558100  | 0.59344200  | -0.94846700 |
| H  | 4.73562900  | -0.68986200 | -1.34428000 |
| H  | 4.46735800  | 0.94584300  | -1.94057400 |
| O  | -2.04894800 | -0.87194300 | -0.84561100 |
| O  | -2.20915400 | 0.45611700  | 0.92565000  |



|   |             |             |             |
|---|-------------|-------------|-------------|
| C | -2.74998000 | -0.27505500 | 0.03158200  |
| C | -4.26562400 | -0.40756900 | 0.02411000  |
| H | -4.66053200 | 0.58331400  | -0.23699600 |
| H | -4.58025600 | -0.58294800 | 1.05919200  |
| C | -4.82078500 | -1.47447300 | -0.92086400 |
| H | -4.46602900 | -2.47242500 | -0.64461300 |
| H | -5.91554100 | -1.48181800 | -0.88620800 |
| H | -4.50694200 | -1.28938100 | -1.95161600 |
| C | 0.09961200  | 3.86192300  | 1.30866600  |
| H | 0.87088100  | 4.48075200  | 0.83584900  |
| H | 0.56953600  | 2.93580000  | 1.65051400  |
| H | -0.27278300 | 4.40694500  | 2.18397400  |
| C | -1.05808200 | 3.59307000  | 0.35143300  |
| H | -1.83618000 | 2.99069300  | 0.82776600  |
| H | -1.50681000 | 4.52356500  | -0.00596200 |
| S | -0.59871000 | 2.59769700  | -1.14315800 |
| H | 0.62290000  | 3.12865000  | -1.35297600 |
| S | 0.11024800  | -2.58923000 | 1.27229700  |
| H | -0.90466500 | -3.09254600 | 0.54063500  |
| C | 1.47581500  | -3.55648000 | 0.48248700  |
| H | 1.40289000  | -4.57848600 | 0.86429800  |
| H | 2.38630200  | -3.11399400 | 0.89664900  |
| C | 1.48823000  | -3.52299800 | -1.04298200 |
| H | 2.31895600  | -4.13588400 | -1.41320000 |
| H | 0.56130500  | -3.93268200 | -1.45822900 |
| H | 1.62186800  | -2.50450100 | -1.41598700 |

|   |             |            |             |
|---|-------------|------------|-------------|
| H | -1.25662600 | 1.81121400 | -1.18298400 |
| O | -0.33765800 | 1.82427000 | -0.87523900 |

(ROH)<sub>2</sub>Cd(OA)<sub>2</sub>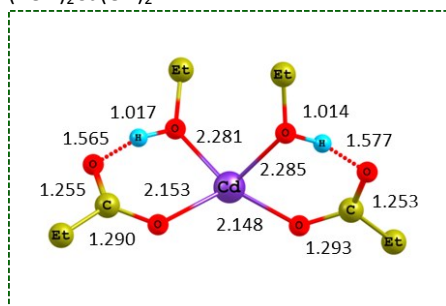

|    |             |             |             |
|----|-------------|-------------|-------------|
| Cd | -0.09180100 | -0.27295000 | -0.24670800 |
| O  | -1.97033800 | -1.30675700 | -0.05156800 |
| O  | -3.26502900 | 0.50198600  | -0.44901400 |
| C  | -3.10861300 | -0.71195600 | -0.16991200 |
| C  | -4.35575700 | -1.56693200 | 0.03279000  |
| H  | -5.01672600 | -1.00255400 | 0.70075000  |
| H  | -4.87074100 | -1.58528300 | -0.93669200 |
| C  | -4.11970000 | -2.98664200 | 0.54885100  |
| H  | -5.07365300 | -3.51493300 | 0.65255900  |
| H  | -3.48332700 | -3.55641700 | -0.13366300 |
| H  | -3.62759800 | -2.97813000 | 1.52621700  |
| O  | 1.71837600  | -0.83650600 | -1.25634300 |
| O  | 3.12091400  | -0.28959400 | 0.43022200  |
| C  | 2.89118200  | -0.71515000 | -0.72530800 |
| C  | 4.04189500  | -1.13981300 | -1.63060200 |
| H  | 3.97037900  | -0.53198200 | -2.54133400 |
| H  | 3.83015500  | -2.16695700 | -1.95215900 |
| C  | 5.43001900  | -1.03114000 | -1.00026200 |
| H  | 5.50791700  | -1.65499100 | -0.10514200 |
| H  | 6.19640900  | -1.35455300 | -1.71276300 |
| H  | 5.65032000  | -0.00225000 | -0.70146600 |
| O  | -1.05245400 | 1.65600200  | -0.99431200 |
| O  | 0.96018800  | 0.14429100  | 1.73857800  |
| C  | -0.82168100 | 3.02978200  | -0.63991800 |
| C  | 0.85420900  | 1.22941400  | 2.67560300  |
| H  | 0.25828500  | 3.19036600  | -0.71554000 |
| H  | -1.11698300 | 3.19564900  | 0.40533200  |
| H  | 1.23050800  | 2.15315700  | 2.21479000  |
| H  | -0.21390700 | 1.36130800  | 2.87382700  |
| C  | -1.57388800 | 3.97269200  | -1.56979600 |
| C  | 1.60815200  | 0.92277800  | 3.96293600  |
| H  | -1.36326600 | 5.01449100  | -1.30154100 |
| H  | -1.27005300 | 3.81249800  | -2.60876700 |
| H  | -2.65488300 | 3.81412500  | -1.49724200 |
| H  | 2.67706600  | 0.78708900  | 3.76788300  |
| H  | 1.49370400  | 1.75020700  | 4.67280300  |
| H  | 1.22284800  | 0.00992400  | 4.42727200  |
| H  | 1.90010100  | 0.02874000  | 1.37650100  |
| H  | -2.00828300 | 1.35852800  | -0.81645900 |

(ROH)Cd(OA)<sub>2</sub>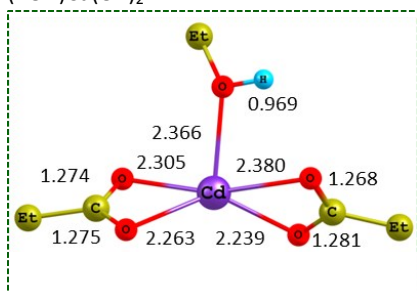

|    |             |             |             |
|----|-------------|-------------|-------------|
| Cd | 0.07545300  | -0.29234300 | 0.09702300  |
| O  | -2.09683800 | -0.45829800 | -0.86136000 |
| O  | -1.68641100 | -1.09165000 | 1.22384000  |
| C  | -2.49475900 | -0.94038100 | 0.24212000  |
| C  | -3.93831000 | -1.37033700 | 0.43688100  |
| H  | -3.91529000 | -2.45392300 | 0.61030700  |
| H  | -4.28041800 | -0.93353200 | 1.38230000  |
| C  | -4.87975300 | -1.02239200 | -0.71675300 |
| H  | -5.88974500 | -1.38947000 | -0.50613500 |
| H  | -4.93680800 | 0.05966300  | -0.87069200 |
| H  | -4.53765200 | -1.46955800 | -1.65398300 |
| O  | 2.05856100  | -1.15946300 | -0.56501000 |
| O  | 2.08170700  | 0.47569500  | 0.93215200  |
| C  | 2.69842300  | -0.36929800 | 0.20462600  |
| C  | 4.21417800  | -0.42644600 | 0.27406600  |
| H  | 4.46844900  | -0.64483800 | 1.31888500  |
| H  | 4.57798600  | 0.59256500  | 0.09470500  |
| C  | 4.87338800  | -1.42793200 | -0.67500000 |
| H  | 4.63946100  | -1.19806700 | -1.71847200 |
| H  | 5.96157600  | -1.40479100 | -0.55337600 |
| H  | 4.52632300  | -2.44606900 | -0.47833600 |
| C  | -0.78956500 | 3.77034800  | 0.57553700  |
| H  | -0.79938400 | 3.15452200  | 1.48025500  |
| H  | -1.82157800 | 3.89170200  | 0.22530900  |
| H  | -0.41022100 | 4.76315600  | 0.84218700  |
| C  | 0.09302800  | 3.15070000  | -0.49859500 |
| H  | 0.12211000  | 3.77537700  | -1.39982400 |
| H  | 1.11543800  | 3.01454100  | -0.13963200 |

C4-TS1

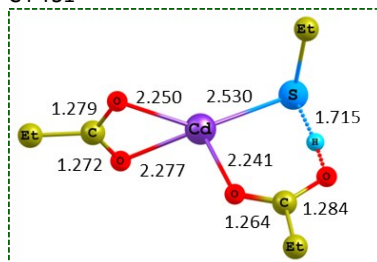

|    |            |             |            |
|----|------------|-------------|------------|
| Cd | 0.57798300 | -0.50432500 | 0.48138000 |
|----|------------|-------------|------------|

|   |             |             |             |
|---|-------------|-------------|-------------|
| O | -2.59899900 | 0.24448900  | -0.72428500 |
| O | -0.53254700 | 1.14381300  | -0.55420500 |
| C | -1.75495500 | 1.20170700  | -0.86976900 |
| C | -2.26687300 | 2.51424300  | -1.44116500 |
| H | -2.39502100 | 3.18635300  | -0.58092600 |
| H | -1.45612900 | 2.94544400  | -2.03617900 |
| C | -3.57054500 | 2.41707000  | -2.23763700 |
| H | -3.86924000 | 3.40707900  | -2.59672900 |
| H | -3.45491400 | 1.76169000  | -3.10666600 |
| H | -4.37977800 | 2.01112000  | -1.62526000 |
| O | 2.76366700  | -0.41965600 | -0.14974700 |
| O | 2.15174400  | 0.37596400  | 1.82682200  |
| C | 3.05170700  | 0.16221100  | 0.94381000  |
| C | 4.46803300  | 0.62330700  | 1.23239700  |
| H | 4.78897100  | 0.09606300  | 2.13984800  |
| H | 4.40312500  | 1.67982000  | 1.51848800  |
| C | 5.46330600  | 0.41482200  | 0.09049500  |
| H | 5.15299700  | 0.95569800  | -0.80805500 |
| H | 6.45501200  | 0.77542000  | 0.38339800  |
| H | 5.54571000  | -0.64279300 | -0.17490000 |
| C | -2.39168000 | -0.84895900 | 2.69252900  |
| H | -3.10313700 | -0.30453200 | 2.06536300  |
| H | -1.49914000 | -0.22538100 | 2.81924300  |
| H | -2.84289500 | -0.98350100 | 3.68283800  |
| C | -2.04649300 | -2.21141700 | 2.09879600  |
| H | -1.32425500 | -2.74293900 | 2.72372700  |
| H | -2.93685800 | -2.84021500 | 2.01169900  |
| S | -1.31717400 | -2.17774600 | 0.38806500  |
| H | -2.11398000 | -0.81246500 | -0.27717500 |

C4-IM2

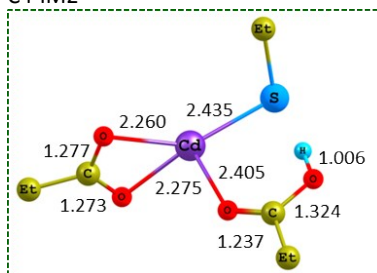

|    |             |             |             |
|----|-------------|-------------|-------------|
| Cd | 0.36311900  | -0.50176900 | -0.29298000 |
| O  | -3.04967600 | 0.69196500  | 0.03693400  |
| O  | -0.92988900 | 1.43157900  | 0.31817600  |
| C  | -2.15285300 | 1.60494800  | 0.37614300  |
| C  | -2.75642900 | 2.91855100  | 0.81011100  |
| H  | -3.71825300 | 2.72433400  | 1.29300600  |
| H  | -2.07614900 | 3.37159600  | 1.53595200  |
| C  | -2.94967700 | 3.86242700  | -0.39506800 |
| H  | -3.37140100 | 4.81326500  | -0.05656600 |
| H  | -1.99476100 | 4.06921500  | -0.88733100 |
| H  | -3.63446600 | 3.42896000  | -1.13013200 |
| O  | 2.32209500  | 0.52847100  | -0.81689000 |
| O  | 2.09944500  | -0.43491400 | 1.16589100  |
| C  | 2.79574200  | 0.22993900  | 0.32633900  |
| C  | 4.19815000  | 0.65455400  | 0.72030600  |
| H  | 4.74045600  | -0.26174400 | 0.98470800  |
| H  | 4.10368100  | 1.21584400  | 1.65798400  |
| C  | 4.95440400  | 1.46120100  | -0.33594400 |
| H  | 4.42455400  | 2.38588000  | -0.58167500 |
| H  | 5.95230200  | 1.72336800  | 0.03126700  |
| H  | 5.06740000  | 0.89208800  | -1.26298400 |
| C  | -1.69572800 | -2.88094800 | 1.57353000  |
| H  | -2.56424600 | -2.24409400 | 1.76934500  |
| H  | -0.79884900 | -2.34812600 | 1.91088700  |
| H  | -1.79234200 | -3.78474200 | 2.18808400  |

|   |             |             |             |
|---|-------------|-------------|-------------|
| C | -1.60221600 | -3.25705600 | 0.09700400  |
| H | -0.73986400 | -3.90340000 | -0.08726400 |
| H | -2.49446900 | -3.81004800 | -0.21255000 |
| S | -1.51236400 | -1.83315100 | -1.09158400 |
| H | -2.61965100 | -0.15557000 | -0.29178900 |

C4

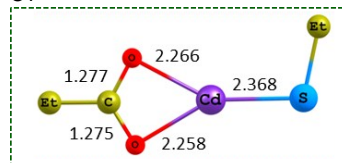

|    |             |             |             |
|----|-------------|-------------|-------------|
| Cd | 0.27359000  | -0.32721900 | -0.01398500 |
| O  | -1.92445100 | -0.79657900 | 0.20698600  |
| O  | -1.31341900 | 1.25816500  | -0.33720700 |
| C  | -2.23003600 | 0.40804400  | -0.07856600 |
| C  | -3.67738600 | 0.85633400  | -0.11489000 |
| H  | -3.84466500 | 1.29368400  | -1.10683900 |
| H  | -3.76108100 | 1.69453600  | 0.58796500  |
| C  | -4.70395400 | -0.23363400 | 0.19462100  |
| H  | -4.54834200 | -0.65238700 | 1.19275800  |
| H  | -5.71706900 | 0.17896100  | 0.14867300  |
| H  | -4.63582200 | -1.05720200 | -0.52164600 |
| C  | 3.31899300  | 1.70239800  | 0.53228100  |
| H  | 3.59273300  | 1.40637100  | 1.54937200  |
| H  | 2.28891400  | 2.07790100  | 0.55419700  |
| H  | 3.96748700  | 2.53372800  | 0.22827900  |
| C  | 3.46789500  | 0.53472500  | -0.43972600 |
| H  | 3.19190400  | 0.82845700  | -1.45590400 |
| H  | 4.51003100  | 0.20050800  | -0.47294000 |
| S  | 2.54209200  | -1.00612000 | 0.02792500  |

C5-TS1

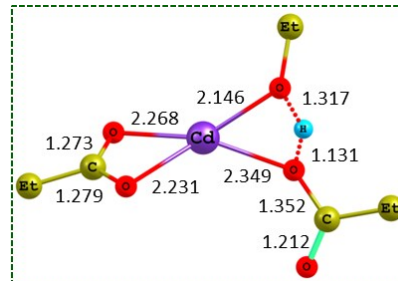

|    |             |             |             |
|----|-------------|-------------|-------------|
| Cd | -0.49944200 | 0.32539400  | 0.10584000  |
| C  | 1.38002900  | 2.92277900  | -0.28253000 |
| H  | 1.27881300  | 2.91027900  | -1.37931800 |
| H  | 0.58390600  | 3.56863400  | 0.11185900  |
| C  | 2.74277100  | 3.48340500  | 0.10950300  |
| H  | 2.84528200  | 3.51673300  | 1.19885400  |
| H  | 3.55071000  | 2.86260600  | -0.29315200 |
| H  | 2.86666000  | 4.49945000  | -0.28372300 |
| O  | 1.95189100  | -2.69804000 | -0.30611800 |
| C  | 2.37526800  | -1.56235700 | -0.33929400 |
| C  | 3.82712300  | -1.17492100 | -0.09628800 |
| H  | 4.19081200  | -0.68518300 | -1.00946900 |
| H  | 3.84340800  | -0.40050100 | 0.68225700  |
| C  | 4.71904500  | -2.35666000 | 0.28382600  |
| H  | 5.75004300  | -2.02125500 | 0.43508300  |
| H  | 4.37095100  | -2.83101600 | 1.20568100  |
| H  | 4.71294700  | -3.11951100 | -0.49921500 |
| O  | 1.56451800  | -0.52041500 | -0.63222600 |
| H  | 1.76247600  | 0.53907200  | -0.28919400 |
| O  | -2.16409900 | -0.60649500 | 1.26225000  |
| O  | -2.57778700 | 0.13494500  | -0.78194100 |
| C  | -2.97474000 | -0.42813200 | 0.28876800  |

|   |             |             |             |
|---|-------------|-------------|-------------|
| C | -4.40546400 | -0.90394600 | 0.43772600  |
| H | -4.79236900 | -0.45332300 | 1.35964300  |
| H | -4.35271000 | -1.98059600 | 0.64160400  |
| C | -5.31525600 | -0.60867300 | -0.75513200 |
| H | -4.93835900 | -1.08034500 | -1.66673100 |
| H | -6.32332900 | -0.98940200 | -0.56186500 |
| H | -5.38508400 | 0.46623000  | -0.94466000 |
| O | 1.21502600  | 1.60878700  | 0.24960800  |

|   |             |             |             |
|---|-------------|-------------|-------------|
| O | -1.52840100 | 0.94086400  | -0.03883800 |
| C | -2.17851000 | -0.14324600 | -0.01209700 |
| C | -3.69328200 | -0.16866300 | -0.02622500 |
| H | -4.00802700 | -0.80581300 | 0.80874200  |
| H | -3.98610400 | -0.71414200 | -0.93239300 |
| C | -4.36051300 | 1.20562200  | 0.03292700  |
| H | -4.05816700 | 1.82920800  | -0.81274100 |
| H | -5.44951700 | 1.09626800  | 0.00953200  |
| H | -4.08904600 | 1.73855400  | 0.94864200  |
| O | 2.43121300  | -0.32203000 | -0.00129700 |

C5-IM2

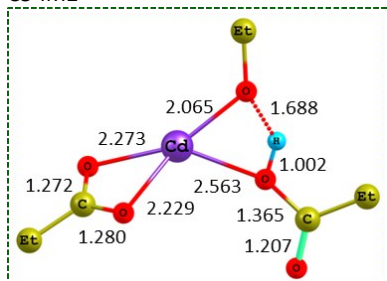

|    |             |             |             |
|----|-------------|-------------|-------------|
| Cd | -0.54480000 | 0.54922600  | 0.12027300  |
| C  | 1.32413100  | 3.02975100  | -0.16174200 |
| H  | 0.95260600  | 3.29033300  | -1.16628700 |
| H  | 0.71466400  | 3.59002100  | 0.56468500  |
| C  | 2.78296200  | 3.45700800  | -0.03121500 |
| H  | 3.16242500  | 3.22597800  | 0.96967100  |
| H  | 3.40625300  | 2.93505700  | -0.76581200 |
| H  | 2.88529700  | 4.53562500  | -0.20115000 |
| O  | 1.99824500  | -2.89191400 | -0.40088500 |
| C  | 2.37885500  | -1.74670600 | -0.36733200 |
| C  | 3.78553100  | -1.29687100 | -0.00540400 |
| H  | 4.19449100  | -0.76228300 | -0.87368600 |
| H  | 3.70696200  | -0.54872600 | 0.79471500  |
| C  | 4.70114100  | -2.44970900 | 0.40552000  |
| H  | 5.69911000  | -2.07149100 | 0.64763100  |
| H  | 4.30639500  | -2.97086800 | 1.28198800  |
| H  | 4.79334300  | -3.18353700 | -0.39949800 |
| O  | 1.52108500  | -0.73378700 | -0.68784000 |
| H  | 1.86452000  | 0.19253800  | -0.52177400 |
| O  | -2.08716000 | -0.58033600 | 1.26735800  |
| O  | -2.59363700 | 0.12284700  | -0.76769400 |
| C  | -2.91675300 | -0.49475100 | 0.29671300  |
| C  | -4.27526200 | -1.14932200 | 0.44134700  |
| H  | -4.69871800 | -0.79492300 | 1.38857400  |
| H  | -4.08545200 | -2.21971000 | 0.59098500  |
| C  | -5.23466600 | -0.91611300 | -0.72614400 |
| H  | -4.81434000 | -1.28969000 | -1.66373700 |
| H  | -6.18237200 | -1.43260600 | -0.54273600 |
| H  | -5.44531500 | 0.14884100  | -0.86032900 |
| O  | 1.21333100  | 1.63229500  | 0.07321200  |

C5

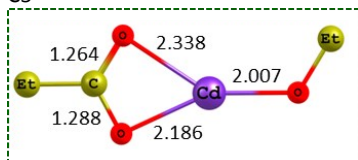

|    |             |             |             |
|----|-------------|-------------|-------------|
| Cd | 0.42429300  | -0.34479900 | 0.00219000  |
| C  | 3.16471700  | 0.89839800  | 0.01412700  |
| H  | 2.91841300  | 1.52739600  | -0.85742900 |
| H  | 2.93713100  | 1.49256100  | 0.91478700  |
| C  | 4.65378900  | 0.56665100  | -0.00789600 |
| H  | 4.92312100  | -0.03875800 | 0.86364700  |
| H  | 4.90585600  | -0.00069600 | -0.90970000 |
| H  | 5.25287100  | 1.48577000  | 0.00603800  |
| O  | -1.55653400 | -1.27040200 | 0.02147600  |

RCOOH

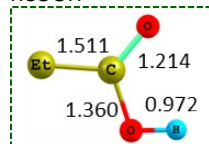

|   |             |             |             |
|---|-------------|-------------|-------------|
| C | 0.61869200  | -0.13356000 | 0.07306000  |
| O | 1.43908300  | -0.94444900 | -0.30394900 |
| O | 0.88489100  | 1.20023800  | 0.10120200  |
| H | 1.79301100  | 1.31592600  | -0.22618900 |
| C | -0.78170100 | -0.44345500 | 0.54906900  |
| C | -1.86819400 | 0.13721400  | -0.37412700 |
| H | -0.86333300 | -1.53055700 | 0.61357800  |
| H | -0.89620300 | -0.02920300 | 1.55770500  |
| H | -1.77704700 | -0.26234400 | -1.38919700 |
| H | -2.85996100 | -0.12840200 | 0.00384100  |
| H | 1.80103400  | 1.22707200  | -0.42577500 |

SePPh<sub>2</sub>H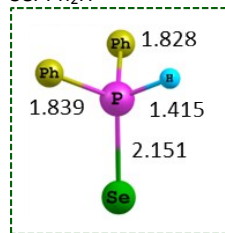

|    |             |             |             |
|----|-------------|-------------|-------------|
| P  | -0.02183300 | 0.60467600  | -0.65425600 |
| C  | 1.50151600  | -0.28608800 | -0.17583800 |
| C  | 1.78581200  | -0.51600500 | 1.17918800  |
| C  | 2.40666100  | -0.71455800 | -1.15698700 |
| C  | 2.95472000  | -1.18383200 | 1.54369100  |
| H  | 1.09923400  | -0.16563800 | 1.94479600  |
| C  | 3.58040200  | -1.37905400 | -0.78760800 |
| H  | 2.20401200  | -0.52738500 | -2.20847200 |
| C  | 3.85355700  | -1.61606500 | 0.56142000  |
| H  | 3.16853200  | -1.36141600 | 2.59362900  |
| H  | 4.27867500  | -1.70601000 | -1.55263500 |
| H  | 4.76565600  | -2.13112500 | 0.84884600  |
| C  | -1.41616200 | -0.52925700 | -0.26345200 |
| C  | -2.55877000 | -0.04286600 | 0.38126500  |
| C  | -1.34820500 | -1.88125200 | -0.63823900 |
| C  | -3.62767000 | -0.90271100 | 0.65198600  |
| H  | -2.60174100 | 1.00428800  | 0.66793900  |
| C  | -2.41923200 | -2.73525800 | -0.37007400 |
| H  | -0.46060000 | -2.27230000 | -1.12865300 |
| C  | -3.56040800 | -2.24616100 | 0.27548700  |
| H  | -4.51126200 | -0.51976300 | 1.15434900  |
| H  | -2.36217900 | -3.78007800 | -0.66164100 |
| H  | -4.39242500 | -2.91253900 | 0.48485900  |
| Se | -0.23070000 | 2.61737700  | 0.07436500  |
| H  | 0.07007000  | 0.50963600  | -2.06261100 |

HPPPh<sub>2</sub>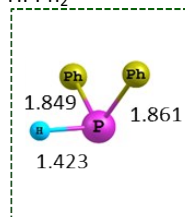

|   |             |             |             |
|---|-------------|-------------|-------------|
| P | 0.04767600  | 1.66775400  | -0.26849400 |
| H | -0.01274300 | 1.74307100  | -1.68842000 |
| C | -1.43536900 | 0.58308500  | -0.06540600 |
| C | -2.23731700 | 0.18364300  | -1.14730200 |
| C | -1.81986300 | 0.19686100  | 1.23097400  |
| C | -3.38751500 | -0.58460300 | -0.94044400 |
| H | -1.96439400 | 0.47250000  | -2.15872400 |
| C | -2.95870800 | -0.58307700 | 1.43720700  |
| H | -1.22472100 | 0.50911900  | 2.08569500  |
| C | -3.74844500 | -0.97429400 | 0.35115500  |
| H | -3.99583400 | -0.88230400 | -1.79007800 |
| H | -3.23539400 | -0.87715500 | 2.44577300  |
| H | -4.63938800 | -1.57439300 | 0.51184100  |
| C | 1.46097700  | 0.46359900  | -0.13878500 |
| C | 2.65267400  | 0.92736900  | 0.43944900  |
| C | 1.40353300  | -0.86508500 | -0.59079900 |
| C | 3.76770500  | 0.08996200  | 0.55143600  |
| H | 2.70804700  | 1.94913500  | 0.80634900  |
| C | 2.51347000  | -1.70383900 | -0.47436800 |
| H | 0.48614100  | -1.24857500 | -1.02801900 |
| C | 3.69966000  | -1.22737700 | 0.09460400  |
| H | 4.68278400  | 0.46606500  | 1.00029600  |
| H | 2.45348100  | -2.72946700 | -0.82813900 |
| H | 4.56206600  | -1.88176700 | 0.18451700  |

RNH<sub>2</sub>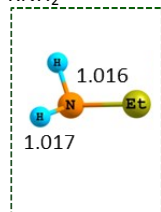

|   |             |             |             |
|---|-------------|-------------|-------------|
| C | 1.24988900  | -0.23947700 | -0.02923900 |
| H | 1.31064000  | -0.77205600 | -0.98348300 |
| H | 1.30747100  | -0.98229000 | 0.77615700  |
| H | 2.12135600  | 0.41771200  | 0.06350100  |
| C | -0.04775300 | 0.56173000  | 0.05608700  |
| H | -0.06279100 | 1.12854900  | 1.00344400  |
| H | -0.07431000 | 1.30043100  | -0.75376000 |
| N | -1.21041600 | -0.31956000 | -0.11451800 |
| H | -1.26382800 | -0.99793800 | 0.64179300  |
| H | -2.07843800 | 0.20899100  | -0.10711300 |

## C

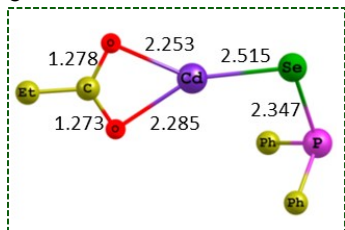

|    |             |            |             |
|----|-------------|------------|-------------|
| Cd | 1.28084400  | 0.00127200 | -1.00375300 |
| Se | -0.85256400 | 0.29999000 | -2.30076100 |
| P  | -2.46655800 | 0.40479600 | -0.59992400 |
| C  | -1.71339700 | 1.58599700 | 0.61250800  |

|   |             |             |             |
|---|-------------|-------------|-------------|
| C | -2.13959400 | 2.92271900  | 0.53884900  |
| C | -0.74074800 | 1.23883800  | 1.56726600  |
| C | -1.59818500 | 3.89301500  | 1.38722900  |
| H | -2.89498000 | 3.20478500  | -0.19018500 |
| C | -0.20045600 | 2.20804800  | 2.41571400  |
| H | -0.41088300 | 0.20830900  | 1.66528400  |
| C | -0.62646600 | 3.53789700  | 2.32647800  |
| H | -1.93779700 | 4.92245100  | 1.31547300  |
| H | 0.55142000  | 1.92161300  | 3.14564000  |
| H | -0.20572900 | 4.29022800  | 2.98759600  |
| C | -2.35015800 | -1.20693300 | 0.30868300  |
| C | -2.92458800 | -1.28117200 | 1.59314500  |
| C | -1.88194000 | -2.39081600 | -0.28222700 |
| C | -2.99948000 | -2.49751500 | 2.27332500  |
| H | -3.30877600 | -0.38403300 | 2.07130400  |
| C | -1.96157800 | -3.60983500 | 0.39939000  |
| H | -1.45422300 | -2.36155700 | -1.27966600 |
| C | -2.51569200 | -3.66801000 | 1.67960700  |
| H | -3.43600500 | -2.52968300 | 3.26781400  |
| H | -1.58785900 | -4.51326300 | -0.07482000 |
| H | -2.57464200 | -4.61451200 | 2.20918200  |
| O | 3.53333700  | 0.01822700  | -0.93858500 |
| O | 2.43002200  | -0.58516000 | 0.88220400  |
| C | 3.53011400  | -0.37654200 | 0.27722100  |
| C | 4.85924300  | -0.59479300 | 0.97354600  |
| H | 5.40236000  | -1.33962600 | 0.37844300  |
| H | 5.42950300  | 0.33528000  | 0.86182500  |
| C | 4.76341400  | -1.01982400 | 2.43908400  |
| H | 5.76543100  | -1.16452400 | 2.85603400  |
| H | 4.24921400  | -0.26313500 | 3.03857200  |
| H | 4.20816800  | -1.95594800 | 2.54452000  |

## E

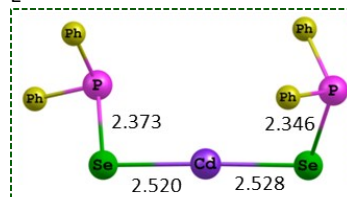

|    |             |             |             |
|----|-------------|-------------|-------------|
| Cd | 0.03011800  | 1.98446500  | -0.25455400 |
| P  | 2.52043900  | -0.20994100 | 0.08240300  |
| Se | 2.63283400  | 2.08179200  | 0.06472500  |
| C  | 3.61385300  | -0.85601100 | -1.25058300 |
| C  | 3.89449900  | -2.23543000 | -1.26808100 |
| C  | 4.08569300  | -0.05217400 | -2.29809900 |
| C  | 4.64525800  | -2.79147600 | -2.30419100 |
| H  | 3.53256300  | -2.87602000 | -0.46830100 |
| C  | 4.83643200  | -0.61395600 | -3.33576200 |
| H  | 3.87198700  | 1.01219000  | -2.29618200 |
| C  | 5.11931600  | -1.98153700 | -3.34228500 |
| H  | 4.85962300  | -3.85663000 | -2.30074300 |
| H  | 5.20167200  | 0.02265000  | -4.13687900 |
| H  | 5.70363800  | -2.41522700 | -4.14889500 |
| C  | 3.33263100  | -0.77875400 | 1.63239600  |
| C  | 4.72985900  | -0.79702800 | 1.78154100  |
| C  | 2.52190400  | -1.16679800 | 2.71051700  |
| C  | 5.30307000  | -1.20153700 | 2.98792200  |
| H  | 5.36856800  | -0.49711800 | 0.95627300  |
| C  | 3.09953400  | -1.56839700 | 3.91848300  |
| H  | 1.44110500  | -1.15393000 | 2.60226500  |
| C  | 4.48935200  | -1.58718200 | 4.05907700  |
| H  | 6.38439700  | -1.21170000 | 3.09326700  |
| H  | 2.46255300  | -1.86809600 | 4.74594800  |
| H  | 4.93812900  | -1.90057500 | 4.99754900  |
| Se | -0.08960000 | -0.72803100 | -0.09589800 |



|   |             |             |             |
|---|-------------|-------------|-------------|
| O | -1.91519600 | 2.97167900  | 0.55969800  |
| O | -1.38414000 | 3.24310300  | -1.57576800 |
| C | -2.15375900 | 3.47068700  | -0.59144400 |
| C | -3.37756000 | 4.35771000  | -0.75923600 |
| H | -4.23061500 | 3.81664900  | -0.33210000 |
| H | -3.22460000 | 5.22229500  | -0.10052500 |
| C | -3.66214700 | 4.80630400  | -2.19323500 |
| H | -4.54760700 | 5.45043200  | -2.22189400 |
| H | -2.81624500 | 5.36208100  | -2.60654300 |
| H | -3.84036400 | 3.94882400  | -2.84902200 |
| P | -2.61353900 | -0.80819200 | -0.20082200 |
| H | -3.19207400 | 0.32946100  | -0.80612700 |
| C | -3.46877400 | -0.81919600 | 1.41719600  |
| C | -3.93284200 | -2.01194700 | 1.99291700  |
| C | -3.56759500 | 0.38600500  | 2.13554300  |
| C | -4.50704200 | -1.99747800 | 3.26686100  |
| H | -3.85655500 | -2.94912300 | 1.44942300  |
| C | -4.14559600 | 0.39073700  | 3.40666600  |
| H | -3.18682000 | 1.31329300  | 1.71228500  |
| C | -4.61694800 | -0.79745500 | 3.97466900  |
| H | -4.86862400 | -2.92434400 | 3.70313800  |
| H | -4.22356600 | 1.32609300  | 3.95346900  |
| H | -5.06452100 | -0.78815200 | 4.96440300  |
| C | -3.31930000 | -2.17770500 | -1.19420400 |
| C | -2.47102200 | -3.18340500 | -1.67877800 |
| C | -4.69143300 | -2.22326700 | -1.49876100 |
| C | -2.98924200 | -4.22747400 | -2.45201800 |
| H | -1.40766200 | -3.14134500 | -1.46157400 |
| C | -5.20357000 | -3.26365200 | -2.27472500 |
| H | -5.35864700 | -1.45015800 | -1.12763500 |
| C | -4.35266900 | -4.26816000 | -2.75062400 |
| H | -2.32496100 | -5.00199100 | -2.82409000 |
| H | -6.26385400 | -3.28991600 | -2.50934400 |
| H | -4.75333900 | -5.07667000 | -3.35544700 |

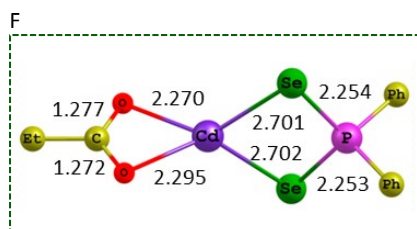

|    |             |             |             |
|----|-------------|-------------|-------------|
| Cd | 1.94348900  | -0.20149700 | -0.00299400 |
| P  | -1.33674000 | 0.01406500  | 0.00098200  |
| Se | -0.03648500 | -0.16190800 | 1.83337000  |
| Se | -0.03590500 | -0.05525100 | -1.83706900 |
| C  | -2.30983100 | 1.56615800  | 0.06119300  |
| C  | -3.32398600 | 1.69020100  | 1.02668000  |
| C  | -2.03084500 | 2.63769600  | -0.79625300 |
| C  | -4.05520600 | 2.87358800  | 1.12198700  |
| H  | -3.54410200 | 0.86784900  | 1.70119300  |
| C  | -2.76675700 | 3.82221400  | -0.69435400 |
| H  | -1.24476000 | 2.54452600  | -1.53898400 |
| C  | -3.77772300 | 3.94177600  | 0.26131300  |
| H  | -4.83844900 | 2.96256500  | 1.86904100  |
| H  | -2.54731100 | 4.64821200  | -1.36443500 |
| H  | -4.34787600 | 4.86306000  | 0.33839200  |
| C  | -2.58424500 | -1.32720300 | -0.05208900 |
| C  | -3.65169100 | -1.22537900 | -0.96082000 |
| C  | -2.45969900 | -2.46908300 | 0.74958400  |
| C  | -4.58614000 | -2.25608600 | -1.05730800 |
| H  | -3.75665900 | -0.34602700 | -1.58940900 |
| C  | -3.39952300 | -3.49877100 | 0.64749500  |
| H  | -1.63531700 | -2.54908900 | 1.45113900  |
| C  | -4.46125000 | -3.39480200 | -0.25381800 |

|   |             |             |             |
|---|-------------|-------------|-------------|
| H | -5.40930800 | -2.17086200 | -1.76061500 |
| H | -3.29911400 | -4.37952900 | 1.27487600  |
| H | -5.18989100 | -4.19656400 | -0.33150500 |
| O | 3.89891300  | -1.35428100 | -0.04343600 |
| O | 3.97806700  | 0.86053100  | 0.00621900  |
| C | 4.56768700  | -0.26621700 | -0.02342100 |
| C | 6.08380100  | -0.34790800 | -0.04269000 |
| H | 6.37415000  | -1.03295400 | 0.76276500  |
| H | 6.35573200  | -0.86242200 | -0.97309800 |
| C | 6.80756500  | 0.99372100  | 0.07721500  |
| H | 7.89198800  | 0.84291000  | 0.04819700  |
| H | 6.53088400  | 1.66679700  | -0.73899500 |
| H | 6.55611200  | 1.49640800  | 1.01563500  |

E-i

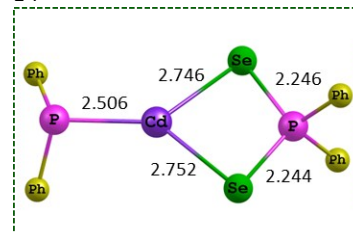

|    |             |             |             |
|----|-------------|-------------|-------------|
| Cd | -0.91607100 | -0.20243600 | -0.59249400 |
| P  | -3.33449200 | -0.32566200 | -1.23642400 |
| C  | -4.03379500 | -1.46471300 | 0.05437200  |
| C  | -3.68009300 | -1.46280700 | 1.41732900  |
| C  | -4.96784800 | -2.42105800 | -0.38298300 |
| C  | -4.24292300 | -2.37800200 | 2.30953700  |
| H  | -2.96055100 | -0.73714900 | 1.78759100  |
| C  | -5.53171200 | -3.34129000 | 0.50744900  |
| H  | -5.25447800 | -2.44307500 | -1.43100600 |
| C  | -5.17027300 | -3.32253800 | 1.85609300  |
| H  | -3.95220400 | -2.35776300 | 3.35645500  |
| H  | -6.25064200 | -4.07096300 | 0.14484600  |
| H  | -5.60369500 | -4.03814900 | 2.54915600  |
| C  | -3.91790500 | 1.35706400  | -0.71142700 |
| C  | -4.84153500 | 1.59078100  | 0.32179700  |
| C  | -3.48219700 | 2.46144900  | -1.47160700 |
| C  | -5.30078300 | 2.88433800  | 0.59284400  |
| H  | -5.20852900 | 0.76304300  | 0.91967900  |
| C  | -3.93389100 | 3.75146000  | -1.19496900 |
| H  | -2.78332600 | 2.30925200  | -2.29183900 |
| C  | -4.84751600 | 3.97130300  | -0.15749200 |
| H  | -6.01560000 | 3.03822700  | 1.39722700  |
| H  | -3.57557600 | 4.58552200  | -1.79252800 |
| H  | -5.20259700 | 4.97494600  | 0.05805100  |
| P  | 2.35945500  | -0.01134600 | 0.04820900  |
| Se | 0.99204300  | -1.64794900 | 0.75237800  |
| Se | 1.19322700  | 1.46712400  | -1.17277000 |
| C  | 3.74928700  | -0.71721500 | -0.91889100 |
| C  | 4.70473200  | -1.50441900 | -0.25351000 |
| C  | 3.85249200  | -0.52031500 | -2.30143000 |
| C  | 5.75515000  | -2.07962000 | -0.96779600 |
| H  | 4.63182200  | -1.66732200 | 0.81788200  |
| C  | 4.90701400  | -1.10128100 | -3.01263600 |
| H  | 3.11414600  | 0.08661700  | -2.81607800 |
| C  | 5.85778500  | -1.87946700 | -2.34918500 |
| H  | 6.49095600  | -2.68558400 | -0.44723900 |
| H  | 4.98237800  | -0.94170100 | -4.08431400 |
| H  | 6.67613700  | -2.32955200 | -2.90382900 |
| C  | 3.16469900  | 0.83029200  | 1.46577900  |
| C  | 4.19387200  | 1.75178100  | 1.20696100  |
| C  | 2.74995100  | 0.60423600  | 2.78384600  |
| C  | 4.80311000  | 2.43207900  | 2.26074000  |
| H  | 4.51943100  | 1.93872000  | 0.18774400  |

|   |            |             |            |
|---|------------|-------------|------------|
| C | 3.36342000 | 1.29077000  | 3.83640000 |
| H | 1.95396300 | -0.10626900 | 2.98359100 |
| C | 4.38820400 | 2.20315700  | 3.57768000 |
| H | 5.59862000 | 3.14201700  | 2.05400300 |
| H | 3.03868900 | 1.10819300  | 4.85662600 |
| H | 4.86341200 | 2.73518600  | 4.39684000 |

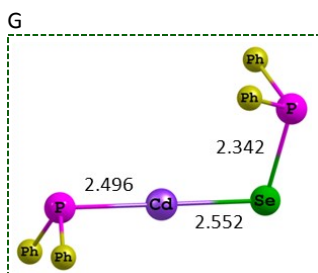

|    |             |             |             |
|----|-------------|-------------|-------------|
| Se | 1.57528500  | -0.27864800 | 2.27999400  |
| P  | 3.39607400  | 0.51419500  | 1.03814300  |
| C  | 2.60956000  | 1.74566100  | -0.10870800 |
| C  | 2.06822000  | 1.43338200  | -1.36882000 |
| C  | 2.55918900  | 3.07989200  | 0.33209100  |
| C  | 1.48075300  | 2.42629700  | -2.15856200 |
| H  | 2.12000100  | 0.41565200  | -1.74536800 |
| C  | 1.96807500  | 4.07180900  | -0.45491300 |
| H  | 2.98200400  | 3.34012400  | 1.29918800  |
| C  | 1.42697400  | 3.74760200  | -1.70292200 |
| H  | 1.06598500  | 2.16591900  | -3.12841100 |
| H  | 1.93767800  | 5.09722700  | -0.09695700 |
| H  | 0.97224500  | 4.51834800  | -2.31874000 |
| C  | 3.84636700  | -0.84916600 | -0.13897700 |
| C  | 4.81327200  | -0.55001300 | -1.11934400 |
| C  | 3.40262800  | -2.17395700 | -0.02123600 |
| C  | 5.29453300  | -1.54142800 | -1.97514700 |
| H  | 5.18994700  | 0.46517600  | -1.22037500 |
| C  | 3.89158300  | -3.16962100 | -0.87502800 |
| H  | 2.67555300  | -2.42940500 | 0.74341200  |
| C  | 4.83393600  | -2.85767600 | -1.85648600 |
| H  | 6.03229000  | -1.28714700 | -2.73129400 |
| H  | 3.53267100  | -4.18975500 | -0.76798600 |
| H  | 5.21208700  | -3.63082400 | -2.51925500 |
| P  | -2.12803800 | -0.19185800 | -1.14926400 |
| C  | -3.09686400 | -1.69288100 | -0.63613000 |
| C  | -3.31488800 | -2.67796600 | -1.61509200 |
| C  | -3.59806600 | -1.92218400 | 0.66004400  |
| C  | -4.00449000 | -3.85718700 | -1.31037600 |
| H  | -2.94459800 | -2.51750800 | -2.62426800 |
| C  | -4.29271300 | -3.09378800 | 0.96420400  |
| H  | -3.45111200 | -1.17486000 | 1.43556800  |
| C  | -4.49533000 | -4.06807000 | -0.02069200 |
| H  | -4.16021000 | -4.60497600 | -2.08313000 |
| H  | -4.67014700 | -3.24997500 | 1.97116800  |
| H  | -5.03190400 | -4.98183800 | 0.21830900  |
| C  | -3.15064700 | 1.23284600  | -0.54139600 |
| C  | -4.54333000 | 1.14815800  | -0.36793200 |
| C  | -2.54099900 | 2.49435000  | -0.39245000 |
| C  | -5.29519300 | 2.28166400  | -0.04201800 |
| H  | -5.04919100 | 0.19552300  | -0.48826300 |
| C  | -3.29197400 | 3.62371500  | -0.06491000 |
| H  | -1.46753600 | 2.60069200  | -0.53616200 |
| C  | -4.67587400 | 3.52355800  | 0.11499200  |
| H  | -6.37013900 | 2.18846900  | 0.08866700  |
| H  | -2.79398100 | 4.58241500  | 0.05282600  |
| H  | -5.26118300 | 4.40140000  | 0.37272300  |
| Cd | -0.30143800 | -0.23740900 | 0.55050500  |

C/J-IM1

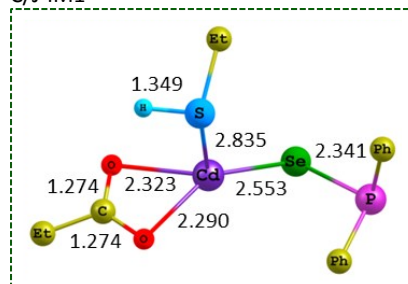

|    |             |             |             |
|----|-------------|-------------|-------------|
| Cd | -1.19962300 | -0.37236600 | 0.55853200  |
| P  | 2.31056200  | 1.19815700  | 1.13528100  |
| Se | 0.66227200  | -0.01821800 | 2.26895300  |
| C  | 3.06421100  | 0.01262600  | -0.07843100 |
| C  | 3.22686400  | -1.34772300 | 0.23535900  |
| C  | 3.68792100  | 0.50635900  | -1.24042600 |
| C  | 3.97408400  | -2.19045200 | -0.59300300 |
| H  | 2.76456900  | -1.74588500 | 1.13405500  |
| C  | 4.42716700  | -0.33847600 | -2.07209900 |
| H  | 3.59524700  | 1.55622700  | -1.50325100 |
| C  | 4.57421700  | -1.69157500 | -1.75278900 |
| H  | 4.09346500  | -3.23762300 | -0.32588000 |
| H  | 4.89085100  | 0.06405800  | -2.96865400 |
| H  | 5.15494500  | -2.34675400 | -2.39585200 |
| C  | 1.35008400  | 2.33940700  | 0.03837800  |
| C  | 1.23718600  | 3.67309800  | 0.46443300  |
| C  | 0.71269100  | 1.95897900  | -1.15628000 |
| C  | 0.49735300  | 4.60034100  | -0.27612500 |
| H  | 1.72732300  | 3.98416000  | 1.38338500  |
| C  | -0.02556300 | 2.88368000  | -1.89693400 |
| H  | 0.80463200  | 0.93951400  | -1.52142200 |
| C  | -0.13695300 | 4.20706300  | -1.45674500 |
| H  | 0.41772200  | 5.62689700  | 0.07053800  |
| H  | -0.51962000 | 2.56955600  | -2.81183700 |
| H  | -0.71543400 | 4.92465000  | -2.03147400 |
| C  | 0.13079100  | -3.58041600 | -1.06408600 |
| H  | 0.04425300  | -4.32081700 | -1.86370500 |
| H  | 1.18353200  | -3.29678900 | -0.98465300 |
| C  | -0.40669500 | -4.11202100 | 0.26066700  |
| H  | -0.25971200 | -3.39011800 | 1.06945400  |
| H  | -1.47365600 | -4.34862100 | 0.19984200  |
| H  | 0.12742800  | -5.03122800 | 0.52842200  |
| O  | -3.37777700 | -1.17479000 | 0.64974300  |
| O  | -2.92379200 | 0.61211400  | -0.58197200 |
| C  | -3.75982300 | -0.22665800 | -0.11126000 |
| C  | -5.23819000 | -0.10473200 | -0.44161500 |
| H  | -5.57566700 | -1.09219700 | -0.77860700 |
| H  | -5.75285900 | 0.06595900  | 0.51261500  |
| C  | -5.59137800 | 0.98395100  | -1.45599700 |
| H  | -6.67382700 | 1.01316700  | -1.62023500 |
| H  | -5.26807700 | 1.96797400  | -1.10595000 |
| H  | -5.10427600 | 0.80282300  | -2.41887400 |
| S  | -0.68926700 | -2.03907800 | -1.67691400 |
| H  | -1.95758600 | -2.49839100 | -1.68091000 |

C/J-TS1

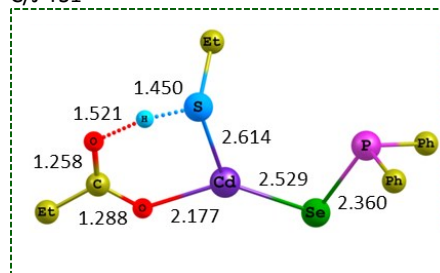

|    |             |             |             |
|----|-------------|-------------|-------------|
| Cd | 1.59350000  | -0.00799300 | -0.44424300 |
| P  | -1.87358200 | -0.13677700 | 0.53682500  |
| Se | -0.65080100 | -0.65102500 | -1.41532800 |
| C  | -2.59070100 | 1.54572000  | 0.21064700  |
| C  | -3.21782100 | 2.16186900  | 1.30953900  |
| C  | -2.51932300 | 2.24658600  | -1.00142200 |
| C  | -3.78073900 | 3.43428500  | 1.19166000  |
| H  | -3.26670700 | 1.64329900  | 2.26473500  |
| C  | -3.07413200 | 3.52573500  | -1.11700500 |
| H  | -2.02509200 | 1.79280300  | -1.85508300 |
| C  | -3.70858400 | 4.12168700  | -0.02431900 |
| H  | -4.26478400 | 3.89135400  | 2.05038100  |
| H  | -3.00974800 | 4.05440500  | -2.06434000 |
| H  | -4.13746500 | 5.11562000  | -0.11594800 |
| C  | -3.34130500 | -1.22814900 | 0.24308200  |
| C  | -4.42901500 | -0.88740000 | -0.57753200 |
| C  | -3.35252800 | -2.47152900 | 0.89897100  |
| C  | -5.49901600 | -1.77073100 | -0.73906800 |
| H  | -4.44305500 | 0.07060200  | -1.08781600 |
| C  | -4.42037000 | -3.35673000 | 0.73412000  |
| H  | -2.52064900 | -2.74615500 | 1.54298600  |
| C  | -5.49706100 | -3.00740400 | -0.08616600 |
| H  | -6.33392600 | -1.49314700 | -1.37675100 |
| H  | -4.41325300 | -4.31403000 | 1.24799300  |
| H  | -6.33082700 | -3.69225200 | -0.21307300 |
| C  | 1.96526400  | -0.32141700 | 3.10084900  |
| H  | 2.52814900  | -0.02891500 | 3.99148300  |
| H  | 0.90093800  | -0.26029100 | 3.34072100  |
| C  | 2.35334300  | -1.72507800 | 2.64521600  |
| H  | 1.74767800  | -2.05195800 | 1.79193700  |
| H  | 3.40910000  | -1.77911500 | 2.36430100  |
| H  | 2.18130000  | -2.43765600 | 3.46047400  |
| O  | 4.84267900  | 0.24145700  | 0.64314300  |
| O  | 3.62144600  | -0.17422800 | -1.21707000 |
| C  | 4.73160100  | -0.05506000 | -0.57467400 |
| C  | 5.98436100  | -0.30395000 | -1.40678700 |
| H  | 5.88236500  | -1.30674600 | -1.84022500 |
| H  | 5.93663900  | 0.38466600  | -2.25969100 |
| C  | 7.30457000  | -0.15767700 | -0.65039100 |
| H  | 8.14852700  | -0.34841700 | -1.32180600 |
| H  | 7.41471600  | 0.84887400  | -0.23693600 |
| H  | 7.36370900  | -0.86218000 | 0.18422900  |
| S  | 2.26406500  | 1.02453100  | 1.86131600  |
| H  | 3.58606300  | 0.65452100  | 1.39492300  |

|   |             |             |             |
|---|-------------|-------------|-------------|
| C | 4.96026200  | 1.00114500  | 0.32314200  |
| H | 5.39886200  | -0.17503600 | 2.08224000  |
| H | 4.28375100  | 1.94612200  | -1.49443400 |
| H | 5.76148000  | 1.71411200  | 0.49691000  |
| C | 0.60958900  | -2.11342200 | 1.08587700  |
| C | 0.40471900  | -0.93224200 | 1.82229000  |
| C | -0.03300400 | -3.28920500 | 1.50879100  |
| C | -0.42954800 | -0.92781700 | 2.94390500  |
| H | 0.91303300  | -0.01888200 | 1.52662600  |
| C | -0.87143300 | -3.28424000 | 2.62773200  |
| H | 0.12282700  | -4.21234100 | 0.95632200  |
| C | -1.07240800 | -2.10341900 | 3.34799800  |
| H | -0.57232400 | -0.00868300 | 3.50617300  |
| H | -1.36041900 | -4.20309200 | 2.93929500  |
| H | -1.71722200 | -2.09950300 | 4.22230800  |
| C | -4.19037800 | 0.05636100  | 0.78435800  |
| H | -3.53778400 | -0.27943700 | 1.59441200  |
| H | -5.01939000 | 0.60953600  | 1.23661600  |
| C | -4.71823400 | -1.12724100 | -0.02278200 |
| H | -5.37055000 | -0.79114200 | -0.83438600 |
| H | -3.90074000 | -1.70758800 | -0.46445800 |
| H | -5.29324600 | -1.79954300 | 0.62618000  |
| O | -1.28138900 | 3.24439500  | 1.21331000  |
| O | 0.10842200  | 2.14196600  | -0.18703600 |
| C | -0.10379600 | 3.03223100  | 0.64216700  |
| C | 0.96519600  | 4.00393500  | 1.08201500  |
| H | 0.89224200  | 4.13186300  | 2.16711900  |
| H | 1.93348800  | 3.55916700  | 0.84147300  |
| C | 0.80833600  | 5.37155000  | 0.38693200  |
| H | 1.60089800  | 6.04889700  | 0.71833400  |
| H | 0.88265100  | 5.27081500  | -0.70041000 |
| H | -0.15569800 | 5.82811700  | 0.62827800  |
| S | -3.29807300 | 1.32254200  | -0.24080400 |
| H | -1.97844900 | 2.61582700  | 0.85532800  |

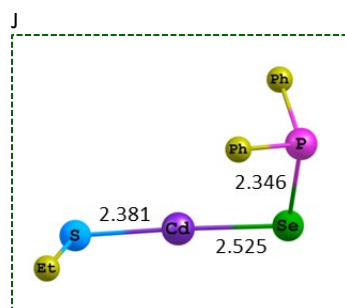

C/J-IM2

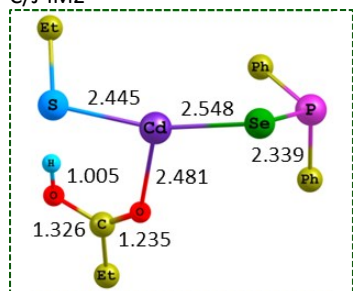

|    |             |             |             |
|----|-------------|-------------|-------------|
| Cd | -1.24454700 | 0.21702500  | -0.97549400 |
| P  | 1.67410500  | -2.22785000 | -0.43121200 |
| Se | 0.24137100  | -1.50010800 | -2.13034400 |
| C  | 2.88298600  | -0.85103800 | -0.13282700 |
| C  | 3.73529000  | -0.98182100 | 0.98161000  |
| C  | 3.10158500  | 0.21041100  | -1.02127300 |
| C  | 4.75715800  | -0.06015700 | 1.21279500  |
| H  | 3.59922000  | -1.80672300 | 1.67723000  |
| C  | 4.13192600  | 1.12948300  | -0.79355400 |
| H  | 2.46084600  | 0.32311700  | -1.88997300 |

|    |             |             |             |
|----|-------------|-------------|-------------|
| Se | -0.61915700 | -1.01727600 | -2.05369200 |
| P  | -2.03225900 | 0.63579100  | -1.17334900 |
| C  | -0.83849600 | 1.88723800  | -0.50210500 |
| C  | -0.24144400 | 1.81913700  | 0.76980900  |
| C  | -0.50905300 | 2.96353800  | -1.34355300 |
| C  | 0.66876900  | 2.79625000  | 1.18222400  |
| H  | -0.50238000 | 1.01423600  | 1.45147000  |
| C  | 0.40496600  | 3.93833000  | -0.93348900 |
| H  | -0.96846500 | 3.03480800  | -2.32616100 |
| C  | 0.99655900  | 3.85665300  | 0.33020000  |
| H  | 1.11600600  | 2.73078500  | 2.17034200  |
| H  | 0.64865600  | 4.76270100  | -1.59777400 |
| H  | 1.70238100  | 4.61684100  | 0.65273900  |
| C  | -2.74054200 | -0.07755900 | 0.38593800  |
| C  | -3.42011900 | 0.80632300  | 1.24772900  |
| C  | -2.77878100 | -1.45020400 | 0.67189300  |
| C  | -4.08843600 | 0.33117200  | 2.37672700  |
| H  | -3.42299200 | 1.87396700  | 1.04219800  |
| C  | -3.45445700 | -1.92599900 | 1.80133900  |
| H  | -2.28074000 | -2.15138500 | 0.00946500  |

|    |             |             |             |
|----|-------------|-------------|-------------|
| C  | -4.10682700 | -1.03908700 | 2.65946000  |
| H  | -4.59669200 | 1.03131600  | 3.03404200  |
| H  | -3.46756800 | -2.99296600 | 2.00662600  |
| H  | -4.62908600 | -1.40918900 | 3.53701600  |
| Cd | 1.23889100  | -1.12024800 | -0.34772600 |
| C  | 4.09777000  | 0.15298200  | 0.82738200  |
| H  | 4.49706500  | 0.05947200  | -0.18606000 |
| H  | 3.48874800  | 1.05948900  | 0.87546000  |
| C  | 5.23919900  | 0.22537100  | 1.84146000  |
| H  | 5.85989900  | -0.67546300 | 1.80339400  |
| H  | 5.87870600  | 1.08975700  | 1.62460700  |
| H  | 4.85557600  | 0.33046100  | 2.86127000  |
| S  | 3.03216700  | -1.32857900 | 1.20424100  |

J-i

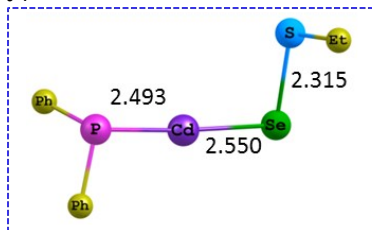

|    |             |             |             |
|----|-------------|-------------|-------------|
| Cd | 0.58076800  | -0.15031200 | -0.07250400 |
| Se | 2.85373200  | -0.25413500 | -1.22430900 |
| C  | 4.61518500  | 0.02367700  | 1.51677700  |
| H  | 3.86932700  | -0.66882800 | 1.91968100  |
| H  | 4.92153000  | 0.68935000  | 2.33372400  |
| C  | 5.81442200  | -0.72347400 | 0.94099400  |
| H  | 6.57285600  | -0.02600100 | 0.57254800  |
| H  | 6.27038400  | -1.35538500 | 1.71301100  |
| H  | 5.51036500  | -1.36974600 | 0.11183300  |
| S  | 3.78409400  | 1.17379500  | 0.34283900  |
| P  | -1.54024400 | -0.01042600 | 1.22982900  |
| C  | -2.31655500 | 1.49051200  | 0.45868900  |
| C  | -2.83886800 | 2.45555100  | 1.33784100  |
| C  | -2.38877900 | 1.74468300  | -0.92468800 |
| C  | -3.41447900 | 3.63544100  | 0.85351200  |
| H  | -2.79397000 | 2.27996700  | 2.40932500  |
| C  | -2.96508700 | 2.91956400  | -1.41054100 |
| H  | -1.99680500 | 1.01600800  | -1.62983100 |
| C  | -3.47846400 | 3.87043400  | -0.52113100 |
| H  | -3.81060900 | 4.36746400  | 1.55179000  |
| H  | -3.00730800 | 3.09590500  | -2.48185100 |
| H  | -3.92169500 | 4.78715600  | -0.89943600 |
| C  | -2.47393600 | -1.43888600 | 0.49731200  |
| C  | -3.69464100 | -1.31063300 | -0.18647200 |
| C  | -1.99070100 | -2.73784600 | 0.75360900  |
| C  | -4.39859500 | -2.44274600 | -0.61149200 |
| H  | -4.10445400 | -0.32646300 | -0.38816900 |
| C  | -2.68923800 | -3.86534700 | 0.32266700  |
| H  | -1.05938200 | -2.87078400 | 1.30140800  |
| C  | -3.89989400 | -3.72341400 | -0.36530800 |
| H  | -5.34096100 | -2.31722700 | -1.13817300 |
| H  | -2.29060000 | -4.85524800 | 0.52771600  |
| H  | -4.44650500 | -4.60003900 | -0.70037800 |

J-ii

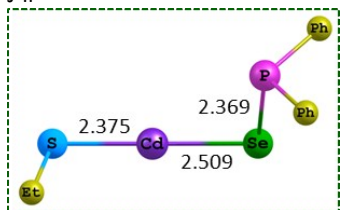

|    |             |             |             |
|----|-------------|-------------|-------------|
| Se | -0.04148900 | -0.44762300 | -1.41078100 |
|----|-------------|-------------|-------------|

|    |             |             |             |
|----|-------------|-------------|-------------|
| P  | -1.13638300 | 0.01250300  | 0.63956300  |
| C  | -2.56563100 | -1.15456000 | 0.51368700  |
| C  | -3.64509800 | -0.98151100 | -0.36961600 |
| C  | -2.54664400 | -2.28377800 | 1.34884500  |
| C  | -4.67938200 | -1.91734400 | -0.41413800 |
| H  | -3.67789300 | -0.11269800 | -1.02042200 |
| C  | -3.58202200 | -3.22236400 | 1.30302600  |
| H  | -1.71929200 | -2.42735900 | 2.03947100  |
| C  | -4.64983500 | -3.04024800 | 0.42102100  |
| H  | -5.50809300 | -1.77226600 | -1.10175300 |
| H  | -3.55470400 | -4.08977300 | 1.95659800  |
| H  | -5.45667300 | -3.76683900 | 0.38445800  |
| C  | -1.97310900 | 1.63931900  | 0.32325600  |
| C  | -2.94313000 | 2.04008800  | 1.26315400  |
| C  | -1.61843900 | 2.53437700  | -0.69562500 |
| C  | -3.55241300 | 3.29183200  | 1.17149900  |
| H  | -3.23067700 | 1.36834600  | 2.06843000  |
| C  | -2.22749900 | 3.79155200  | -0.78394200 |
| H  | -0.87358000 | 2.24591800  | -1.43048500 |
| C  | -3.19568500 | 4.17443800  | 0.14580300  |
| H  | -4.30374800 | 3.57837800  | 1.90226500  |
| H  | -1.94400900 | 4.46778100  | -1.58598600 |
| H  | -3.66818300 | 5.15004100  | 0.07531000  |
| Cd | 2.23472800  | -0.54579800 | -0.35908100 |
| C  | 4.97914900  | 1.04070000  | 0.71516600  |
| H  | 4.97997100  | 1.49650400  | -0.27847000 |
| H  | 4.28707200  | 1.59853100  | 1.35137500  |
| C  | 6.38627600  | 1.07035000  | 1.31139300  |
| H  | 7.09404900  | 0.52222400  | 0.68152400  |
| H  | 6.73487700  | 2.10679400  | 1.39588300  |
| H  | 6.40145100  | 0.62250000  | 2.31003100  |
| S  | 4.40685000  | -0.72845300 | 0.58372400  |

E/J-IM1

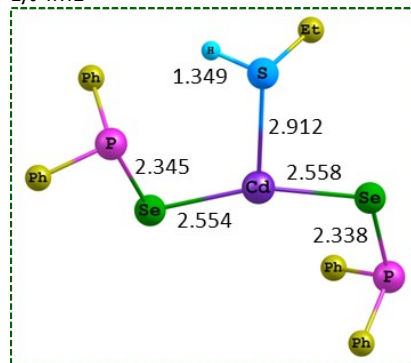

|    |            |             |             |
|----|------------|-------------|-------------|
| Se | 2.77016400 | -1.57932100 | -1.21303300 |
| P  | 4.41311900 | -0.53963200 | 0.08532700  |
| C  | 3.59102200 | -0.33278200 | 1.73400100  |
| C  | 2.76349700 | 0.74891500  | 2.08298200  |
| C  | 3.81822900 | -1.34155700 | 2.68638500  |
| C  | 2.17117400 | 0.81287800  | 3.34677500  |
| H  | 2.58879800 | 1.55112900  | 1.37184400  |
| C  | 3.22201000 | -1.28063400 | 3.94879300  |
| H  | 4.46355400 | -2.17952600 | 2.43457400  |
| C  | 2.39651600 | -0.20268800 | 4.28183700  |
| H  | 1.53157400 | 1.65435800  | 3.59794100  |
| H  | 3.40837800 | -2.06951100 | 4.67243900  |
| H  | 1.93512200 | -0.15091000 | 5.26402000  |
| C  | 4.50092000 | 1.21627300  | -0.50931700 |
| C  | 5.26874600 | 2.11454700  | 0.25833300  |
| C  | 3.98643300 | 1.65864400  | -1.73629300 |
| C  | 5.48681700 | 3.42236700  | -0.17625100 |
| H  | 5.69392200 | 1.79443300  | 1.20654900  |
| C  | 4.21077900 | 2.96871600  | -2.17441100 |



|    |             |             |             |
|----|-------------|-------------|-------------|
| H  | 3.40866000  | 0.97705100  | -2.35258000 |
| C  | 4.95647400  | 3.85600100  | -1.39644200 |
| H  | 6.07310700  | 4.10144700  | 0.43685700  |
| H  | 3.79810500  | 3.29227300  | -3.12624000 |
| H  | 5.12787300  | 4.87330000  | -1.73665700 |
| Cd | 0.54841000  | -0.49514800 | -0.55485100 |
| Se | -1.09276600 | 1.10835200  | 0.56775300  |
| C  | -0.42930300 | -4.08415700 | -1.23910600 |
| H  | -0.38701500 | -3.98958100 | -0.15142800 |
| H  | 0.59969600  | -4.15119800 | -1.60190500 |
| C  | -1.25642100 | -5.29277000 | -1.66871400 |
| H  | -1.28815300 | -5.38575300 | -2.75824400 |
| H  | -0.81154000 | -6.20705400 | -1.25860000 |
| H  | -2.28536800 | -5.22585000 | -1.30073800 |
| P  | -2.98117800 | 0.56169200  | -0.70987000 |
| C  | -3.98506400 | 2.09401400  | -0.44917200 |
| C  | -4.71139100 | 2.37087700  | 0.72101600  |
| C  | -4.00698500 | 3.02915300  | -1.49782200 |
| C  | -5.44194900 | 3.55526100  | 0.83714600  |
| H  | -4.70886700 | 1.65971000  | 1.54149600  |
| C  | -4.73376900 | 4.21671300  | -1.37929100 |
| H  | -3.45302200 | 2.82496400  | -2.41070400 |
| C  | -5.45362700 | 4.48161600  | -0.21104400 |
| H  | -6.00016400 | 3.75623400  | 1.74754300  |
| H  | -4.74039200 | 4.92993000  | -2.19887200 |
| H  | -6.02252600 | 5.40247700  | -0.11787000 |
| C  | -3.91408500 | -0.66889100 | 0.33150800  |
| C  | -5.08125800 | -1.20478800 | -0.24811400 |
| C  | -3.51017900 | -1.14850300 | 1.58612000  |
| C  | -5.83388000 | -2.17292200 | 0.41925000  |
| H  | -5.40652400 | -0.85919900 | -1.22724400 |
| C  | -4.25935400 | -2.12667900 | 2.25087700  |
| H  | -2.60908600 | -0.75130700 | 2.04446100  |
| C  | -5.42341900 | -2.63884500 | 1.67343200  |
| H  | -6.73566900 | -2.56668400 | -0.04169000 |
| H  | -3.93222900 | -2.48230500 | 3.22444600  |
| H  | -6.00449800 | -3.39652200 | 2.19160300  |
| S  | -1.05430000 | -2.49035000 | -1.94427400 |
| H  | -2.20082300 | -2.41169000 | -1.23697500 |

|    |             |             |             |
|----|-------------|-------------|-------------|
| C  | -3.84074400 | 1.66846100  | -0.72413200 |
| C  | -4.27311200 | 1.75896500  | -2.06229900 |
| C  | -3.13875700 | 2.75415600  | -0.17782000 |
| C  | -3.98605900 | 2.88660700  | -2.83305300 |
| H  | -4.83295400 | 0.94183300  | -2.50937500 |
| C  | -2.85463000 | 3.88550900  | -0.94996900 |
| H  | -2.81339900 | 2.71553700  | 0.85735500  |
| C  | -3.27260200 | 3.95554000  | -2.28032000 |
| H  | -4.32074800 | 2.92963100  | -3.86610400 |
| H  | -2.30222700 | 4.71009200  | -0.50750000 |
| H  | -3.04864400 | 4.83291700  | -2.88044100 |
| Cd | -0.59025500 | 0.04432000  | 1.29118000  |
| Se | 0.78316700  | 0.80183000  | -0.88725700 |
| C  | 1.30219500  | -2.63691500 | 2.60391800  |
| H  | 1.46362000  | -2.86318400 | 1.54460900  |
| H  | 0.29728000  | -2.97621700 | 2.86796500  |
| C  | 2.35386100  | -3.32956500 | 3.46919800  |
| H  | 2.19432500  | -3.11493200 | 4.53028300  |
| H  | 2.30010900  | -4.41588100 | 3.32707700  |
| H  | 3.36435300  | -3.00143900 | 3.20518700  |
| P  | 2.74955600  | 0.02037500  | -0.09575700 |
| C  | 3.96339200  | 1.38209300  | 0.03313100  |
| C  | 4.46299900  | 2.04740700  | -1.09902100 |
| C  | 4.37982200  | 1.78574500  | 1.31197900  |
| C  | 5.37173200  | 3.09509400  | -0.95126500 |
| H  | 4.14015200  | 1.74784200  | -2.09184100 |
| C  | 5.28996800  | 2.83771100  | 1.45561600  |
| H  | 3.99602600  | 1.28257300  | 2.19525900  |
| C  | 5.78638600  | 3.49163700  | 0.32591100  |
| H  | 5.75367300  | 3.60528000  | -1.83087200 |
| H  | 5.60826400  | 3.14274000  | 2.44823800  |
| H  | 6.49239400  | 4.30955600  | 0.43754000  |
| C  | 3.47835200  | -1.18381700 | -1.27334200 |
| C  | 4.84871100  | -1.49085100 | -1.18003300 |
| C  | 2.68170500  | -1.88195600 | -2.19375600 |
| C  | 5.40676600  | -2.47535700 | -1.99708500 |
| H  | 5.48263800  | -0.95895300 | -0.47649600 |
| C  | 3.24635900  | -2.86596200 | -3.00958700 |
| H  | 1.62612100  | -1.64346900 | -2.27970500 |
| C  | 4.60762200  | -3.16600200 | -2.91399000 |
| H  | 6.46675300  | -2.69968600 | -1.91872300 |
| H  | 2.62043300  | -3.39317700 | -3.72396400 |
| H  | 5.04452600  | -3.92974400 | -3.55077900 |
| S  | 1.34473000  | -0.79446400 | 2.82888800  |
| H  | 2.28674600  | -0.47694000 | 1.44960100  |

E/J-TS1

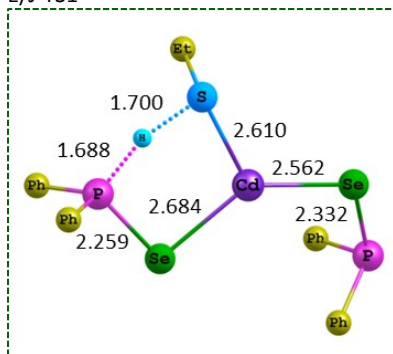

|    |             |             |             |
|----|-------------|-------------|-------------|
| Se | -3.00876300 | 0.09212200  | 2.13668700  |
| P  | -4.42942900 | 0.23359000  | 0.29255200  |
| C  | -3.94416500 | -1.21335300 | -0.76092000 |
| C  | -2.86334300 | -1.23124300 | -1.65905900 |
| C  | -4.72408100 | -2.37471500 | -0.62611000 |
| C  | -2.57192100 | -2.37916400 | -2.39919400 |
| H  | -2.25046600 | -0.34490500 | -1.79090700 |
| C  | -4.42835500 | -3.52719600 | -1.35981100 |
| H  | -5.56699000 | -2.37501200 | 0.06049100  |
| C  | -3.35132600 | -3.53166900 | -2.25006900 |
| H  | -1.73612700 | -2.37206000 | -3.09392600 |
| H  | -5.04237600 | -4.41568900 | -1.24064700 |
| H  | -3.12322900 | -4.42341800 | -2.82746300 |

E/J-IM2

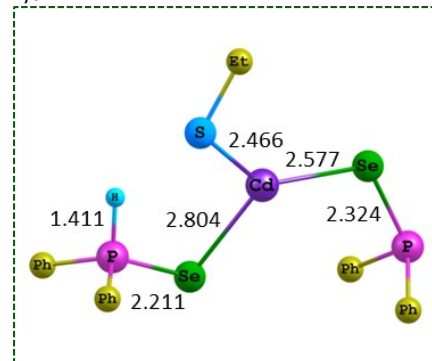

|    |            |             |             |
|----|------------|-------------|-------------|
| Se | 3.11071100 | 1.32323200  | -1.33140800 |
| P  | 4.28514900 | -0.32927700 | -0.19510300 |
| C  | 3.40912300 | -1.91388100 | -0.59544300 |
| C  | 2.47801100 | -2.55791600 | 0.23620400  |
| C  | 3.75731600 | -2.52750300 | -1.81305300 |
| C  | 1.91063100 | -3.77913700 | -0.14167800 |

|    |             |             |             |
|----|-------------|-------------|-------------|
| H  | 2.19909500  | -2.11378400 | 1.18639000  |
| C  | 3.18132000  | -3.73979700 | -2.19637100 |
| H  | 4.48348400  | -2.04787400 | -2.46469400 |
| C  | 2.25702100  | -4.37248500 | -1.35838400 |
| H  | 1.19291400  | -4.26162100 | 0.51636300  |
| H  | 3.46191900  | -4.19506000 | -3.14233100 |
| H  | 1.81501400  | -5.32142800 | -1.64948000 |
| C  | 3.91966500  | -0.12643000 | 1.61288700  |
| C  | 4.49026500  | -1.07360200 | 2.48684700  |
| C  | 3.24924400  | 0.97144800  | 2.16956800  |
| C  | 4.36261700  | -0.94155700 | 3.87001900  |
| H  | 5.03688100  | -1.92313900 | 2.08411300  |
| C  | 3.12721900  | 1.10840500  | 3.55708200  |
| H  | 2.83009400  | 1.72935200  | 1.51507600  |
| C  | 3.67782800  | 0.15215200  | 4.41205800  |
| H  | 4.80331400  | -1.68892400 | 4.52447200  |
| H  | 2.60093400  | 1.96713600  | 3.96556100  |
| H  | 3.58316700  | 0.25911200  | 5.48907000  |
| Cd | 0.56576900  | 1.19404800  | -0.94757000 |
| Se | -0.74059200 | -1.07929100 | 0.04645300  |
| C  | -0.47040900 | 4.11892400  | -2.42576800 |
| H  | -0.16054200 | 3.66475900  | -3.37082200 |
| H  | 0.42347700  | 4.49628700  | -1.92180400 |
| C  | -1.45794100 | 5.25653200  | -2.68213300 |
| H  | -1.76852600 | 5.72710500  | -1.74347700 |
| H  | -0.99413600 | 6.02505700  | -3.31323600 |
| H  | -2.35565300 | 4.89209400  | -3.19241200 |
| P  | -2.78589000 | -0.24052700 | 0.00425400  |
| C  | -3.37158100 | 0.48900400  | 1.56175700  |
| C  | -3.77280600 | -0.33375800 | 2.62705000  |
| C  | -3.35614500 | 1.88446200  | 1.71501600  |
| C  | -4.17270500 | 0.23979600  | 3.83351700  |
| H  | -3.77546900 | -1.41436200 | 2.51564400  |
| C  | -3.75748700 | 2.44957000  | 2.92884200  |
| H  | -3.02027000 | 2.52463800  | 0.90301200  |
| C  | -4.16599100 | 1.63139900  | 3.98480100  |
| H  | -4.48511700 | -0.39737900 | 4.65550700  |
| H  | -3.74595500 | 3.52905200  | 3.04597900  |
| H  | -4.47574300 | 2.07493200  | 4.92665700  |
| C  | -4.03362000 | -1.45553300 | -0.55040800 |
| C  | -5.39873400 | -1.13673500 | -0.44462900 |
| C  | -3.64272800 | -2.67210200 | -1.12485100 |
| C  | -6.36036700 | -2.03245700 | -0.91349100 |
| H  | -5.71199400 | -0.19853500 | 0.00411900  |
| C  | -4.61195800 | -3.56675300 | -1.58704500 |
| H  | -2.58780000 | -2.91486000 | -1.20783400 |
| C  | -5.96801100 | -3.24857200 | -1.48321600 |
| H  | -7.41380300 | -1.78192600 | -0.83122100 |
| H  | -4.30395400 | -4.50967300 | -2.02883700 |
| H  | -6.71900900 | -3.94495900 | -1.84481700 |
| S  | -1.24890600 | 2.81146700  | -1.35987200 |
| H  | -2.83833300 | 0.83841400  | -0.90355900 |

F/K-i-IM1

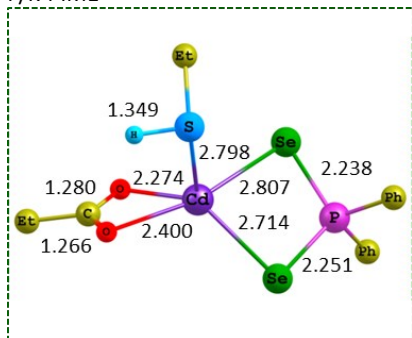

|    |             |             |             |
|----|-------------|-------------|-------------|
| Cd | 1.63831900  | -0.14308800 | -0.15998000 |
| P  | -1.70689200 | -0.13486300 | -0.02621100 |
| Se | -0.38920200 | 0.27661200  | 1.73526300  |
| Se | -0.44900400 | -0.58465700 | -1.83759500 |
| C  | -2.82927300 | 1.28337800  | -0.34268100 |
| C  | -3.80129400 | 1.60106900  | 0.62174100  |
| C  | -2.71216500 | 2.07067500  | -1.49466500 |
| C  | -4.64895900 | 2.69099300  | 0.42724500  |
| H  | -3.89586700 | 1.00108600  | 1.52222500  |
| C  | -3.56399600 | 3.16398800  | -1.68364000 |
| H  | -1.95988600 | 1.82800900  | -2.23891700 |
| C  | -4.53168300 | 3.47500400  | -0.72643700 |
| H  | -5.39852600 | 2.92955600  | 1.17624900  |
| H  | -3.46881400 | 3.76804400  | -2.58133300 |
| H  | -5.19243000 | 4.32422500  | -0.87565600 |
| C  | -2.83137000 | -1.54515500 | 0.31482300  |
| C  | -3.94110400 | -1.75526800 | -0.52124600 |
| C  | -2.56436500 | -2.44636500 | 1.35339500  |
| C  | -4.77609600 | -2.85283900 | -0.31114400 |
| H  | -4.15591700 | -1.06554600 | -1.33212200 |
| C  | -3.40356500 | -3.54528400 | 1.55775000  |
| H  | -1.70702800 | -2.28467400 | 1.99935600  |
| C  | -4.50863400 | -3.75015400 | 0.72852500  |
| H  | -5.63333800 | -3.00776400 | -0.95989800 |
| H  | -3.19141900 | -4.23800100 | 2.36694700  |
| H  | -5.15986100 | -4.60451700 | 0.88960700  |
| C  | 2.72231800  | 3.03703500  | 1.47916000  |
| H  | 3.04343000  | 4.08184000  | 1.46586200  |
| H  | 1.71972900  | 2.99821600  | 1.91458900  |
| C  | 3.70124200  | 2.15905200  | 2.25330000  |
| H  | 3.39074300  | 1.11032600  | 2.26616900  |
| H  | 4.70716100  | 2.20911000  | 1.82254200  |
| H  | 3.76480600  | 2.51076100  | 3.28957400  |
| O  | 3.28095500  | -1.35797900 | 0.83951600  |
| O  | 3.74030900  | -0.63714100 | -1.20872600 |
| C  | 4.06546100  | -1.28234800 | -0.16929700 |
| C  | 5.40318800  | -2.00206900 | -0.08132800 |
| H  | 5.88236600  | -1.67790800 | 0.85054700  |
| H  | 5.17447500  | -3.06511800 | 0.06664200  |
| C  | 6.32793100  | -1.80340000 | -1.28279400 |
| H  | 7.25737900  | -2.36691300 | -1.14601400 |
| H  | 5.85114200  | -2.14181000 | -2.20687200 |
| H  | 6.58437500  | -0.74801500 | -1.41645800 |
| S  | 2.45574400  | 2.53034900  | -0.28115400 |
| H  | 3.74272400  | 2.28930600  | -0.60560300 |

F/K-i-TS1a

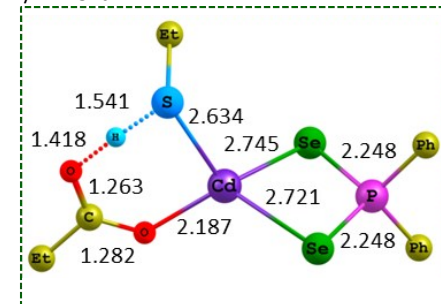

|    |             |             |             |
|----|-------------|-------------|-------------|
| Cd | -1.60470600 | 0.02963800  | 0.26240400  |
| O  | -3.30833900 | -1.33719600 | 0.15207600  |
| C  | -4.55100800 | -1.02471900 | 0.11225000  |
| C  | -5.55136500 | -2.18010600 | 0.05315600  |
| H  | -6.08042100 | -2.17219400 | 1.01959600  |
| H  | -6.30975000 | -1.90897800 | -0.69518100 |
| C  | -4.95804200 | -3.56073000 | -0.22640300 |
| H  | -5.75531200 | -4.31608100 | -0.25039400 |

|    |             |             |             |
|----|-------------|-------------|-------------|
| H  | -4.43659100 | -3.58179000 | -1.19333900 |
| H  | -4.23399100 | -3.84434600 | 0.54484500  |
| O  | -5.02029500 | 0.14782800  | 0.12558700  |
| H  | -4.07770400 | 1.19035900  | 0.31020500  |
| P  | 1.68270300  | -0.20113000 | 0.03224800  |
| Se | 0.29420500  | 0.03459700  | -1.72016000 |
| Se | 0.49403300  | -0.46988900 | 1.92135300  |
| C  | 2.80011900  | 1.25061900  | 0.15115600  |
| C  | 3.69512300  | 1.49829200  | -0.90272300 |
| C  | 2.75252100  | 2.12442100  | 1.24559300  |
| C  | 4.53774300  | 2.60512300  | -0.85198600 |
| H  | 3.73323200  | 0.82910500  | -1.75828600 |
| C  | 3.59841500  | 3.23485200  | 1.28548900  |
| H  | 2.05450300  | 1.93515800  | 2.05698100  |
| C  | 4.49039200  | 3.48011600  | 0.24055200  |
| H  | 5.23082600  | 2.79180400  | -1.66887000 |
| H  | 3.55726400  | 3.90952100  | 2.13641200  |
| H  | 5.14938300  | 4.34308200  | 0.27439400  |
| C  | 2.80270900  | -1.63448500 | -0.21921800 |
| C  | 2.45930600  | -2.66852800 | -1.09788400 |
| C  | 3.98491900  | -1.72450800 | 0.53480500  |
| C  | 3.29505100  | -3.78038600 | -1.22980800 |
| H  | 1.54619200  | -2.60365900 | -1.68084000 |
| C  | 4.81527700  | -2.83330600 | 0.39814700  |
| H  | 4.25950900  | -0.92717800 | 1.22117600  |
| C  | 4.47198200  | -3.86679900 | -0.48213000 |
| H  | 3.02533600  | -4.57928000 | -1.91670100 |
| H  | 5.72890000  | -2.89565400 | 0.98213000  |
| H  | 5.12132700  | -4.73091400 | -0.58497300 |
| C  | -2.97453100 | 2.97223000  | -1.22096300 |
| H  | -2.80274800 | 2.16680200  | -1.94411500 |
| H  | -3.97626900 | 3.37679800  | -1.38853100 |
| C  | -1.90794200 | 4.06275900  | -1.35049000 |
| H  | -2.07646600 | 4.87114100  | -0.63120000 |
| H  | -0.90027500 | 3.66048200  | -1.19011300 |
| H  | -1.94119700 | 4.49097100  | -2.36285300 |
| S  | -2.98534100 | 2.26093400  | 0.49633900  |

|   |             |             |             |
|---|-------------|-------------|-------------|
| C | -3.39743400 | -2.28795700 | 0.42173600  |
| C | -4.38508600 | -0.49849200 | -0.88657300 |
| C | -4.56067500 | -3.04473200 | 0.25499500  |
| H | -2.56390000 | -2.68389500 | 0.99356000  |
| C | -5.54322300 | -1.25887500 | -1.04993000 |
| H | -4.32481800 | 0.48992500  | -1.33240900 |
| C | -5.63304900 | -2.53315500 | -0.47933400 |
| H | -4.62587300 | -4.03277900 | 0.70127400  |
| H | -6.37386900 | -0.85659400 | -1.62253000 |
| H | -6.53605200 | -3.12317600 | -0.60748200 |
| C | -2.34656000 | 1.67912600  | 0.38344800  |
| C | -3.20652000 | 1.86535600  | 1.47945000  |
| C | -1.91889100 | 2.78598900  | -0.35941000 |
| C | -3.63863800 | 3.14684300  | 1.81865400  |
| H | -3.53768100 | 1.01422500  | 2.06745400  |
| C | -2.35358400 | 4.06935900  | -0.01290700 |
| H | -1.24991800 | 2.64272500  | -1.20214100 |
| C | -3.21242400 | 4.25195300  | 1.07256900  |
| H | -4.30456100 | 3.28311300  | 2.66581100  |
| H | -2.01951500 | 4.92315800  | -0.59534700 |
| H | -3.54911000 | 5.24971600  | 1.33928700  |
| C | 3.82587900  | -2.67829600 | 1.10590300  |
| H | 3.73698200  | -1.93492900 | 1.90372800  |
| H | 3.01535500  | -3.40195800 | 1.22817400  |
| C | 5.18140900  | -3.38015400 | 1.18111200  |
| H | 5.27961500  | -4.13134700 | 0.39098800  |
| H | 6.00384600  | -2.66571200 | 1.07229800  |
| H | 5.29258800  | -3.88412400 | 2.14924900  |
| S | 3.61774900  | -1.84595800 | -0.54529800 |

F/K-i-IM2a

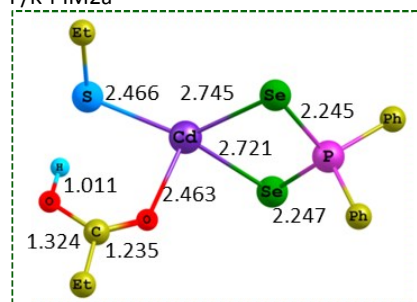

|    |             |             |             |
|----|-------------|-------------|-------------|
| Cd | 1.44961400  | -0.69349000 | -0.31930100 |
| O  | 2.46213500  | 1.52803700  | 0.00781000  |
| C  | 3.64272700  | 1.87316100  | 0.11501000  |
| C  | 4.04804300  | 3.30775300  | 0.36828200  |
| H  | 3.13816600  | 3.87124600  | 0.58631600  |
| H  | 4.68798700  | 3.32370000  | 1.25827100  |
| C  | 4.80644700  | 3.92221400  | -0.82295400 |
| H  | 5.07576800  | 4.95881400  | -0.59894400 |
| H  | 5.72367300  | 3.36603700  | -1.03389600 |
| H  | 4.18767300  | 3.92252600  | -1.72619800 |
| O  | 4.67142600  | 1.04556100  | 0.01242400  |
| H  | 4.37368600  | 0.09781300  | -0.17587200 |
| P  | -1.76933900 | -0.01919600 | -0.00526000 |
| Se | -0.63914600 | -0.06613100 | -1.94716300 |
| Se | -0.46190300 | -0.79163700 | 1.64834700  |
| C  | -3.30646100 | -1.01048900 | -0.14564800 |

F/K-i-TS1b

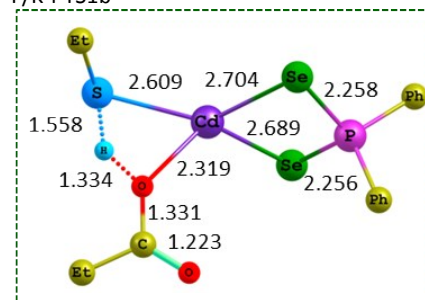

|    |             |             |             |
|----|-------------|-------------|-------------|
| Cd | -1.36195500 | -0.82540000 | 0.22912900  |
| C  | -4.13240900 | -2.61269500 | -1.08204300 |
| H  | -3.76837200 | -1.91955500 | -1.84506000 |
| H  | -3.58499200 | -3.55271600 | -1.18916800 |
| C  | -5.63661800 | -2.83943200 | -1.22103100 |
| H  | -6.00557700 | -3.53051300 | -0.45683700 |
| H  | -6.19055600 | -1.90029000 | -1.12591500 |
| H  | -5.85977800 | -3.26739000 | -2.20579900 |
| O  | -2.30550600 | 2.73793700  | 0.20304200  |
| C  | -3.25464700 | 1.96851600  | 0.14633800  |
| C  | -4.70168400 | 2.41039200  | 0.33911200  |
| H  | -5.25347100 | 2.12634900  | -0.56644900 |
| H  | -5.12906000 | 1.80122200  | 1.14699400  |
| C  | -4.86229500 | 3.90138400  | 0.63425500  |
| H  | -5.92024400 | 4.15405900  | 0.76190400  |
| H  | -4.32727600 | 4.18134100  | 1.54614400  |
| H  | -4.45757200 | 4.50810200  | -0.18067100 |
| O  | -3.10349300 | 0.66983400  | -0.10349100 |
| H  | -3.79203300 | -0.41393600 | 0.25989400  |
| P  | 1.77843300  | -0.03823200 | -0.02016900 |
| Se | 0.63179700  | -0.18804000 | 1.91636600  |
| Se | 0.55598000  | -0.97353600 | -1.67158500 |
| C  | 3.39619500  | -0.87869400 | 0.15836300  |
| C  | 3.81409200  | -1.85947700 | -0.75006200 |
| C  | 4.22124300  | -0.53731800 | 1.24414900  |



K-i

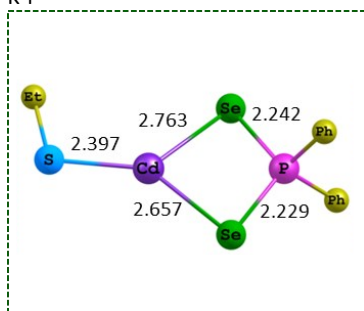

|    |             |             |             |
|----|-------------|-------------|-------------|
| Cd | -2.05482800 | -0.10086100 | 0.43609000  |
| C  | -5.02504600 | -0.05234800 | -1.13282500 |
| H  | -4.58435700 | 0.77192600  | -1.70045200 |
| H  | -4.69163900 | -0.99262900 | -1.58080500 |
| C  | -6.55079600 | 0.03757800  | -1.17029400 |
| H  | -7.00785300 | -0.78582300 | -0.61200500 |
| H  | -6.90080900 | 0.97846000  | -0.73356900 |
| H  | -6.90679500 | -0.01234400 | -2.20683000 |
| P  | 1.16954900  | -0.04221900 | -0.01193000 |
| Se | -0.29785600 | -0.30744900 | -1.68653200 |
| Se | 0.12603300  | -0.18393400 | 1.95220200  |
| C  | 2.03164700  | 1.57018800  | -0.17781000 |
| C  | 1.98114800  | 2.54306800  | 0.82774300  |
| C  | 2.74681600  | 1.82669900  | -1.36065600 |
| C  | 2.64809100  | 3.76078600  | 0.65587300  |
| H  | 1.42212000  | 2.35104500  | 1.73808200  |
| C  | 3.41193700  | 3.04070700  | -1.52489400 |
| H  | 2.78012000  | 1.08474600  | -2.15325800 |
| C  | 3.36361400  | 4.01041800  | -0.51630100 |
| H  | 2.60460200  | 4.51046100  | 1.44049200  |
| H  | 3.96245800  | 3.23233100  | -2.44125500 |
| H  | 3.87964200  | 4.95705500  | -0.64826800 |
| C  | 2.50362800  | -1.29686500 | -0.10276100 |
| C  | 3.72081300  | -1.05975200 | 0.55749200  |
| C  | 2.29959600  | -2.51292500 | -0.76883200 |
| C  | 4.72242000  | -2.03126900 | 0.54473900  |
| H  | 3.89144500  | -0.12073200 | 1.07526600  |
| C  | 3.30643000  | -3.48143900 | -0.77789900 |
| H  | 1.36104800  | -2.69650900 | -1.28249900 |
| C  | 4.51690000  | -3.24339700 | -0.12208200 |
| H  | 5.66204500  | -1.84044700 | 1.05487300  |
| H  | 3.14305500  | -4.41939900 | -1.30040400 |
| H  | 5.29856200  | -3.99752500 | -0.13134000 |
| S  | -4.44039400 | 0.03077100  | 0.63167600  |

K-ii

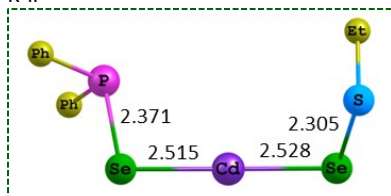

|    |             |             |             |
|----|-------------|-------------|-------------|
| Cd | -1.54599300 | -0.55597400 | -0.86450500 |
| Se | -3.90391800 | -1.04459800 | -0.09429700 |
| Se | 0.77792600  | -0.01104600 | -1.65534200 |
| P  | 1.62693000  | 0.27184700  | 0.54006900  |
| C  | 2.94879100  | 1.51336900  | 0.17380300  |
| C  | 2.61435600  | 2.86745400  | 0.35322800  |
| C  | 4.24761100  | 1.18757200  | -0.25013500 |
| C  | 3.55137100  | 3.87254100  | 0.10539700  |
| H  | 1.61538600  | 3.13470700  | 0.68897200  |
| C  | 5.18625800  | 2.19353600  | -0.49263000 |
| H  | 4.52935600  | 0.14840500  | -0.38714200 |
| C  | 4.84085000  | 3.53706200  | -0.31844700 |

|   |             |             |             |
|---|-------------|-------------|-------------|
| H | 3.27672100  | 4.91401600  | 0.24753300  |
| H | 6.18751200  | 1.92668400  | -0.81966200 |
| H | 5.57286500  | 4.31707300  | -0.50789900 |
| C | 2.61929700  | -1.26632400 | 0.84598100  |
| C | 2.92613900  | -2.25076700 | -0.10425200 |
| C | 3.05371300  | -1.45002800 | 2.17207500  |
| C | 3.66375100  | -3.38284700 | 0.25795200  |
| H | 2.58189300  | -2.13676300 | -1.12757400 |
| C | 3.79868600  | -2.57523700 | 2.53122900  |
| H | 2.80814600  | -0.70890100 | 2.92966600  |
| C | 4.10484400  | -3.54710100 | 1.57333800  |
| H | 3.89238700  | -4.13592000 | -0.49138200 |
| H | 4.12895500  | -2.69726300 | 3.55906000  |
| H | 4.67573400  | -4.42815000 | 1.85252000  |
| C | -4.08133400 | 1.34046200  | 2.10241300  |
| H | -3.00865900 | 1.18005800  | 2.24637700  |
| H | -4.62441300 | 0.57466800  | 2.66245100  |
| C | -4.48938700 | 2.74497400  | 2.55307100  |
| H | -4.26005100 | 2.86980400  | 3.61728400  |
| H | -3.94767800 | 3.51786600  | 1.99828400  |
| H | -5.56242600 | 2.91269400  | 2.41663900  |
| S | -4.48049800 | 1.15024600  | 0.31122900  |

K-i/J-IM1

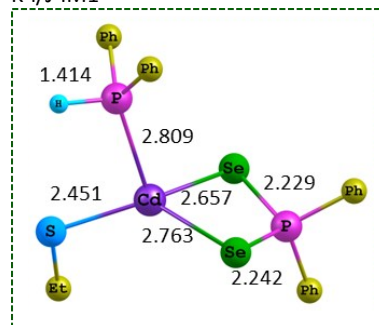

|    |             |             |             |
|----|-------------|-------------|-------------|
| Cd | -0.45617600 | 1.35299900  | -0.54177900 |
| C  | 0.10009200  | 4.72027900  | -0.74971500 |
| H  | 0.38867800  | 4.60588700  | 0.29964100  |
| H  | 0.95965100  | 4.44506700  | -1.36838900 |
| C  | -0.30361000 | 6.16865000  | -1.02786200 |
| H  | -0.58802100 | 6.30225100  | -2.07679500 |
| H  | -1.15572600 | 6.46491600  | -0.40710700 |
| H  | 0.53144900  | 6.84707700  | -0.81017500 |
| P  | 2.13589700  | -0.49635300 | 0.13777900  |
| Se | 1.28505500  | -0.28613800 | -1.92614900 |
| Se | 0.76571400  | 0.43144900  | 1.63063200  |
| C  | 3.80385200  | 0.27491800  | 0.21759900  |
| C  | 4.04984900  | 1.41091000  | 0.99764700  |
| C  | 4.84120700  | -0.27787600 | -0.55259700 |
| C  | 5.32410600  | 1.98741300  | 1.01161100  |
| H  | 3.24866600  | 1.84036800  | 1.59091300  |
| C  | 6.11028600  | 0.29922700  | -0.53324600 |
| H  | 4.65941500  | -1.15418600 | -1.16807300 |
| C  | 6.35404000  | 1.43462900  | 0.24842400  |
| H  | 5.50655900  | 2.86858200  | 1.61994800  |
| H  | 6.90717000  | -0.13397900 | -1.13080700 |
| H  | 7.34280600  | 1.88427400  | 0.25997300  |
| C  | 2.44218700  | -2.25894100 | 0.55835400  |
| C  | 2.95046800  | -2.57257200 | 1.83026800  |
| C  | 2.18121100  | -3.28644900 | -0.35593100 |
| C  | 3.19782100  | -3.90051800 | 2.17660000  |
| H  | 3.14989400  | -1.78369600 | 2.54990700  |
| C  | 2.43216000  | -4.61698800 | -0.00406200 |
| H  | 1.78521200  | -3.04493000 | -1.33770900 |
| C  | 2.93837000  | -4.92591500 | 1.25978400  |
| H  | 3.58941800  | -4.13512300 | 3.16215000  |



|   |             |             |             |
|---|-------------|-------------|-------------|
| H | 2.23013600  | -5.40840000 | -0.72021800 |
| H | 3.13027000  | -5.95981100 | 1.53218000  |
| S | -1.31058900 | 3.57424400  | -1.12705500 |
| P | -2.99568900 | 0.15183200  | -0.52526500 |
| H | -3.89696700 | 0.97413400  | -1.24022900 |
| C | -3.79844900 | 0.20881600  | 1.13022200  |
| C | -4.35442700 | 1.41517000  | 1.58742400  |
| C | -3.77208000 | -0.90242500 | 1.98679100  |
| C | -4.88936900 | 1.50029400  | 2.87500500  |
| H | -4.36556900 | 2.29095200  | 0.94376400  |
| C | -4.31018600 | -0.81292600 | 3.27314800  |
| H | -3.33961300 | -1.84089000 | 1.65183200  |
| C | -4.87061900 | 0.38680600  | 3.72026400  |
| H | -5.32087600 | 2.43740000  | 3.21515300  |
| H | -4.28832500 | -1.68170100 | 3.92498700  |
| H | -5.28825300 | 0.45444400  | 4.72066800  |
| C | -3.40692600 | -1.50083500 | -1.21766100 |
| C | -2.36203400 | -2.37694500 | -1.54776400 |
| C | -4.73689300 | -1.90130200 | -1.43832000 |
| C | -2.64336600 | -3.63775700 | -2.08552900 |
| H | -1.32996800 | -2.07132500 | -1.39953200 |
| C | -5.01339900 | -3.15748700 | -1.97851400 |
| H | -5.5530700  | -1.23334300 | -1.18399200 |
| C | -3.96593300 | -4.02853900 | -2.30161800 |
| H | -1.82720300 | -4.30790200 | -2.33965000 |
| H | -6.04374800 | -3.45666000 | -2.14890500 |
| H | -4.18326500 | -5.00583900 | -2.72333700 |

|   |             |             |             |
|---|-------------|-------------|-------------|
| C | 2.22777800  | -0.57088000 | 2.98857300  |
| C | 4.48291300  | -0.46180400 | 2.10611600  |
| C | 2.74127700  | -0.62392100 | 4.28828900  |
| H | 1.15386600  | -0.59165400 | 2.82565100  |
| C | 4.99178400  | -0.51670200 | 3.40398500  |
| H | 5.16399700  | -0.39638700 | 1.26280700  |
| C | 4.12187300  | -0.59731400 | 4.49777600  |
| H | 2.06152000  | -0.68763400 | 5.13336300  |
| H | 6.06637200  | -0.49291500 | 3.56259500  |
| H | 4.52081800  | -0.63868400 | 5.50747800  |
| C | -3.77307400 | -0.09632600 | 1.17585400  |
| C | -4.11680300 | -0.99940400 | 2.19537500  |
| C | -4.10981200 | 1.26139600  | 1.31114900  |
| C | -4.80542800 | -0.55322400 | 3.32490500  |
| H | -3.85627200 | -2.05038900 | 2.10581100  |
| C | -4.79561100 | 1.70122800  | 2.44613500  |
| H | -3.83203400 | 1.97592000  | 0.54002600  |
| C | -5.14643200 | 0.79718700  | 3.45295100  |
| H | -5.07382900 | -1.26026500 | 4.10479500  |
| H | -5.05585600 | 2.75166100  | 2.53988500  |
| H | -5.68158100 | 1.14218000  | 4.33300500  |
| C | -3.50856400 | -2.22175000 | -0.83766200 |
| C | -2.66696700 | -3.31289800 | -1.09583000 |
| C | -4.89299900 | -2.35001600 | -1.04782600 |
| C | -3.20296500 | -4.51939300 | -1.55847000 |
| H | -1.59639900 | -3.21439000 | -0.94111900 |
| C | -5.42294100 | -3.55438000 | -1.51189500 |
| H | -5.55524800 | -1.51288400 | -0.84568100 |
| C | -4.57813100 | -4.64114200 | -1.76681100 |
| H | -2.54363200 | -5.35955500 | -1.75634700 |
| H | -6.49309700 | -3.64490600 | -1.67498600 |
| H | -4.99320700 | -5.57790400 | -2.12780300 |

K-i/J-TS1

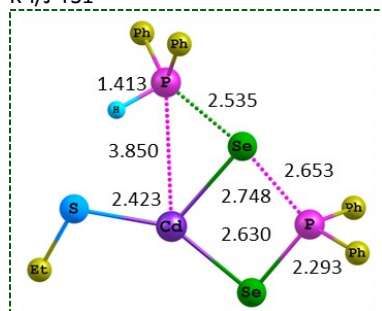

|    |             |             |             |
|----|-------------|-------------|-------------|
| P  | 2.36777500  | -0.37646300 | 0.20178900  |
| Se | 2.69023000  | 1.77048000  | -0.53415900 |
| P  | -2.77645000 | -0.64131200 | -0.25623400 |
| Se | -0.26034200 | -0.70205000 | 0.04530500  |
| H  | -3.19852100 | 0.28512200  | -1.23583000 |
| Cd | 0.07998300  | 1.87076600  | -0.85445100 |
| C  | -1.26744400 | 4.79269800  | -2.04545500 |
| H  | -0.54077100 | 4.68139600  | -2.85521200 |
| H  | -2.14693300 | 5.28960300  | -2.46813200 |
| C  | -0.68819000 | 5.62688700  | -0.90466800 |
| H  | -1.41554000 | 5.74415700  | -0.09527200 |
| H  | 0.20904000  | 5.15858000  | -0.48448200 |
| H  | -0.40816300 | 6.62553300  | -1.26500100 |
| S  | -1.88117500 | 3.11612700  | -1.54624700 |
| C  | 3.42392900  | -1.49543400 | -0.80872700 |
| C  | 3.90330100  | -1.13041000 | -2.07521800 |
| C  | 3.65798800  | -2.80239500 | -0.34118800 |
| C  | 4.61468400  | -2.04885100 | -2.85318300 |
| H  | 3.72852100  | -0.12480600 | -2.44489200 |
| C  | 4.36924700  | -3.71565800 | -1.12046000 |
| H  | 3.29134300  | -3.10693800 | 0.63523700  |
| C  | 4.85064200  | -3.34166500 | -2.37985800 |
| H  | 4.98721300  | -1.74845100 | -3.82862100 |
| H  | 4.54803500  | -4.71870100 | -0.74298100 |
| H  | 5.40540000  | -4.05304000 | -2.98509500 |
| C  | 3.09469700  | -0.49073700 | 1.88816100  |

K-i/J-IM2

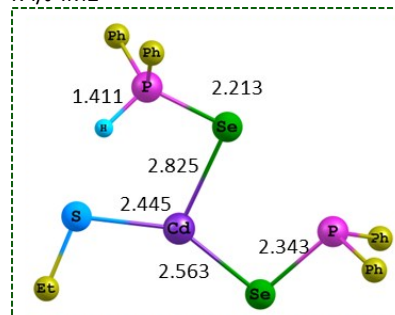

|    |             |             |             |
|----|-------------|-------------|-------------|
| P  | -2.73593800 | 0.51261400  | 0.48577300  |
| Se | -2.57103000 | -1.41702600 | -0.83294000 |
| P  | 3.06332500  | 0.52524600  | 0.07397400  |
| Se | 0.91923700  | 0.77100200  | 0.56546000  |
| H  | 3.21152900  | -0.31726300 | -1.04817100 |
| Cd | -0.01040100 | -1.43557700 | -0.93350000 |
| C  | 1.38388800  | -3.68163800 | -3.13474900 |
| H  | 0.86075600  | -3.08318200 | -3.88571500 |
| H  | 2.29634600  | -4.06388500 | -3.60380900 |
| C  | 0.51094800  | -4.83857600 | -2.65327500 |
| H  | 1.03581000  | -5.44242700 | -1.90651400 |
| H  | -0.41753300 | -4.47537600 | -2.19938000 |
| H  | 0.24160500  | -5.48850800 | -3.49611700 |
| S  | 1.98608700  | -2.56419500 | -1.78181900 |
| C  | -3.71199900 | 1.69860300  | -0.55946900 |
| C  | -3.85373500 | 1.58988700  | -1.95005100 |
| C  | -4.22750300 | 2.84331200  | 0.07971500  |
| C  | -4.50505700 | 2.58974100  | -2.68165800 |
| H  | -3.46368100 | 0.71437100  | -2.45989200 |
| C  | -4.88133100 | 3.83728000  | -0.64941700 |
| H  | -4.12436600 | 2.95664200  | 1.15630700  |

|   |             |             |             |
|---|-------------|-------------|-------------|
| C | -5.02298400 | 3.71427700  | -2.03641900 |
| H | -4.61072600 | 2.48197600  | -3.75805900 |
| H | -5.27986300 | 4.70751600  | -0.13461800 |
| H | -5.53110600 | 4.48805300  | -2.60523000 |
| C | -4.01736500 | -0.01072200 | 1.71665400  |
| C | -3.57917500 | -0.28016200 | 3.02352900  |
| C | -5.38054800 | -0.16968000 | 1.41445600  |
| C | -4.47986700 | -0.69971300 | 4.00739300  |
| H | -2.52727500 | -0.15981500 | 3.27075900  |
| C | -6.28060300 | -0.58665300 | 2.39640100  |
| H | -5.73805500 | 0.03398600  | 0.40942600  |
| C | -5.83280400 | -0.85376000 | 3.69536100  |
| H | -4.12470400 | -0.90276600 | 5.01410600  |
| H | -7.33171400 | -0.70667200 | 2.14769600  |
| H | -6.53550500 | -1.17835100 | 4.45790100  |
| C | 4.07392100  | -0.30359200 | 1.33757700  |
| C | 4.43377200  | 0.36998200  | 2.51612500  |
| C | 4.43665000  | -1.64749600 | 1.15632900  |
| C | 5.16797500  | -0.29386600 | 3.49847600  |
| H | 4.14402700  | 1.40629200  | 2.66559200  |
| C | 5.17073300  | -2.30556400 | 2.14726200  |
| H | 4.13924500  | -2.18249100 | 0.25806100  |
| C | 5.53722800  | -1.63149300 | 3.31458800  |
| H | 5.44811000  | 0.22972800  | 4.40771800  |
| H | 5.45034700  | -3.34513900 | 2.00494100  |
| H | 6.10659900  | -2.14658100 | 4.08287800  |
| C | 3.89131900  | 2.09914200  | -0.35295500 |
| C | 3.14058400  | 3.25731800  | -0.59338000 |
| C | 5.28995300  | 2.12960000  | -0.49098300 |
| C | 3.78529800  | 4.43986800  | -0.96722500 |
| H | 2.06030900  | 3.23148600  | -0.48661200 |
| C | 5.92626100  | 3.31225500  | -0.86951400 |
| H | 5.88130900  | 1.23865300  | -0.30021000 |
| C | 5.17473600  | 4.46838500  | -1.10677200 |
| H | 3.19881300  | 5.33547100  | -1.14918500 |
| H | 7.00687200  | 3.33127900  | -0.97591900 |
| H | 5.67304500  | 5.38829500  | -1.39873300 |

|    |             |             |             |
|----|-------------|-------------|-------------|
| C  | 5.52090200  | 1.43890200  | -2.28342800 |
| H  | 5.77641800  | -0.39669400 | -1.19473800 |
| C  | 3.25495600  | 1.99310100  | -2.90916100 |
| H  | 1.73569600  | 0.59504100  | -2.29321000 |
| C  | 4.61718500  | 2.30210400  | -2.91167300 |
| H  | 6.58455000  | 1.66091000  | -2.29094300 |
| H  | 2.54672800  | 2.65003200  | -3.40717800 |
| H  | 4.97425500  | 3.19961500  | -3.40884700 |
| Cd | -0.57708000 | -0.50695600 | 0.00904100  |
| P  | -2.80989200 | 0.09182100  | 1.02222300  |
| H  | -0.40543000 | 2.73096700  | 0.61245700  |
| C  | -3.95323700 | -1.14961000 | 0.25826100  |
| C  | -3.66424600 | -2.52192700 | 0.38985200  |
| C  | -5.18245600 | -0.78875600 | -0.32299200 |
| C  | -4.56183700 | -3.49511800 | -0.05089700 |
| H  | -2.72451700 | -2.83749100 | 0.83847300  |
| C  | -6.07984600 | -1.76426400 | -0.76807100 |
| H  | -5.44606400 | 0.25893600  | -0.42910000 |
| C  | -5.77610500 | -3.12143900 | -0.63648200 |
| H  | -4.30787200 | -4.54620900 | 0.05665100  |
| H  | -7.02092500 | -1.45772000 | -1.21736900 |
| H  | -6.47339900 | -3.87760600 | -0.98523300 |
| C  | -3.14867200 | 1.65275900  | 0.06667800  |
| C  | -3.34597300 | 2.83579300  | 0.80209200  |
| C  | -3.17440200 | 1.73914400  | -1.33976200 |
| C  | -3.54565600 | 4.06447500  | 0.15986400  |
| H  | -3.35638600 | 2.78977500  | 1.88829100  |
| C  | -3.38382400 | 2.96026400  | -1.98272800 |
| H  | -3.03556000 | 0.84077100  | -1.93557600 |
| C  | -3.56418700 | 4.13039400  | -1.23456400 |
| H  | -3.69789700 | 4.96358800  | 0.75102000  |
| H  | -3.39943900 | 3.00061700  | -3.06861500 |
| H  | -3.72200300 | 5.08085400  | -1.73624200 |
| C  | 0.34501900  | 1.90933900  | 2.75752700  |
| H  | -0.63520600 | 1.44686200  | 2.89744100  |
| H  | 1.10316700  | 1.21562200  | 3.13000700  |
| C  | 0.43862700  | 3.26094300  | 3.46057200  |
| H  | -0.31552600 | 3.96042000  | 3.08530300  |
| H  | 0.26887900  | 3.12957000  | 4.53585700  |
| H  | 1.42388900  | 3.71564600  | 3.32113300  |
| S  | 0.68831700  | 2.00875200  | 0.94069300  |

G/J-IM1

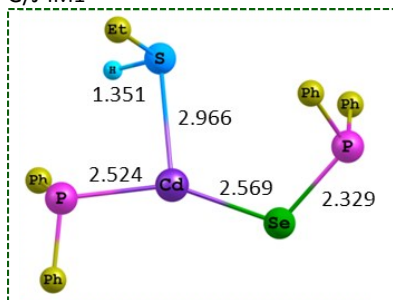

|    |            |             |             |
|----|------------|-------------|-------------|
| Se | 0.99096100 | -2.05163500 | -1.31620500 |
| P  | 3.23275700 | -1.64511800 | -0.83406100 |
| C  | 3.26632500 | -1.22781000 | 0.97636100  |
| C  | 3.70938700 | -0.00086800 | 1.49772100  |
| C  | 2.94179500 | -2.25921100 | 1.87987000  |
| C  | 3.82496900 | 0.18748900  | 2.88032100  |
| H  | 3.97275500 | 0.81114100  | 0.82830300  |
| C  | 3.04091100 | -2.06505900 | 3.25775100  |
| H  | 2.60559700 | -3.21982200 | 1.49801200  |
| C  | 3.48899700 | -0.83959000 | 3.76548100  |
| H  | 4.18163100 | 1.14117400  | 3.26137300  |
| H  | 2.78163700 | -2.87418600 | 3.93513600  |
| H  | 3.58255200 | -0.69248800 | 4.83785000  |
| C  | 3.68635600 | -0.02922100 | -1.62638900 |
| C  | 5.06030800 | 0.27820300  | -1.65853600 |
| C  | 2.79364000 | 0.83656500  | -2.27212700 |

G/J-TS1

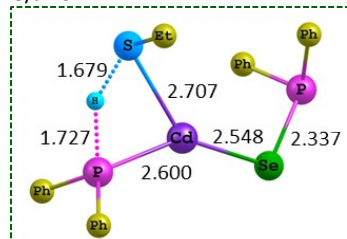

|    |            |             |             |
|----|------------|-------------|-------------|
| Se | 1.41805300 | -0.22061500 | -2.35194300 |
| P  | 3.59216400 | 0.13207900  | -1.57203200 |
| C  | 3.85375800 | -1.18360200 | -0.29420100 |
| C  | 3.51370700 | -1.07263800 | 1.06478800  |
| C  | 4.45347700 | -2.37383700 | -0.74323700 |
| C  | 3.76920900 | -2.12473500 | 1.94827800  |
| H  | 3.05157500 | -0.16550500 | 1.44019900  |
| C  | 4.69773100 | -3.43059700 | 0.13731200  |
| H  | 4.73020600 | -2.47097900 | -1.79013400 |
| C  | 4.35886000 | -3.30681800 | 1.48789400  |
| H  | 3.50786200 | -2.01777200 | 2.99777500  |
| H  | 5.16090900 | -4.34276800 | -0.22865900 |
| H  | 4.55786900 | -4.12217200 | 2.17798700  |
| C  | 3.53499000 | 1.67601900  | -0.54542900 |

|    |             |             |             |
|----|-------------|-------------|-------------|
| C  | 4.63478700  | 1.95128900  | 0.29162500  |
| C  | 2.54659700  | 2.66206800  | -0.68843400 |
| C  | 4.72264400  | 3.15900500  | 0.98549000  |
| H  | 5.42585000  | 1.21552100  | 0.41006700  |
| C  | 2.63738300  | 3.87419700  | 0.00448300  |
| H  | 1.70443800  | 2.48567900  | -1.35048200 |
| C  | 3.72129800  | 4.12626400  | 0.84732600  |
| H  | 5.57449700  | 3.34383400  | 1.63436300  |
| H  | 1.85676200  | 4.62025600  | -0.11845400 |
| H  | 3.78999200  | 5.06632600  | 1.38727200  |
| Cd | -0.18046300 | -0.21740700 | -0.36755800 |
| P  | -2.66377900 | -0.16445600 | 0.39923700  |
| H  | -1.72158600 | -0.35825300 | 1.83299000  |
| C  | -4.04646700 | -1.12161600 | -0.33645600 |
| C  | -3.76428900 | -2.27094400 | -1.09636800 |
| C  | -5.39123100 | -0.78413200 | -0.09572000 |
| C  | -4.79749000 | -3.06618800 | -1.59662700 |
| H  | -2.73271300 | -2.53992900 | -1.30959200 |
| C  | -6.42186700 | -1.57758400 | -0.60333900 |
| H  | -5.63254600 | 0.10071200  | 0.48575100  |
| C  | -6.13033100 | -2.72211200 | -1.35262300 |
| H  | -4.55998400 | -3.94731600 | -2.18619400 |
| H  | -7.45499200 | -1.30092900 | -0.41136300 |
| H  | -6.93432300 | -3.33661000 | -1.74711100 |
| C  | -3.23747800 | 1.57998100  | 0.49414300  |
| C  | -3.27463900 | 2.23432500  | 1.73767900  |
| C  | -3.60822900 | 2.29699400  | -0.65905700 |
| C  | -3.66876500 | 3.57358100  | 1.82613700  |
| H  | -2.99768300 | 1.69548400  | 2.63932500  |
| C  | -4.01410500 | 3.62894100  | -0.56727400 |
| H  | -3.58034900 | 1.80947900  | -1.62974100 |
| C  | -4.04138400 | 4.27229900  | 0.67572000  |
| H  | -3.68985200 | 4.06499400  | 2.79481900  |
| H  | -4.30128500 | 4.16744300  | -1.46615200 |
| H  | -4.35166300 | 5.31105100  | 0.74450800  |
| C  | -0.22139900 | -2.27369700 | 2.43613700  |
| H  | -0.96256000 | -2.62300300 | 1.70510200  |
| H  | 0.75231900  | -2.67194600 | 2.13973000  |
| C  | -0.60305800 | -2.74507900 | 3.83911800  |
| H  | -1.58352200 | -2.35772700 | 4.13344900  |
| H  | -0.64582100 | -3.84091100 | 3.86931500  |
| H  | 0.12928900  | -2.41035000 | 4.58034000  |
| S  | -0.11951900 | -0.42755000 | 2.33009200  |

|    |             |             |             |
|----|-------------|-------------|-------------|
| H  | 3.47508100  | -2.72102800 | -2.59841400 |
| C  | 4.07466800  | -3.65414100 | 0.62072000  |
| H  | 3.96464800  | -2.33266400 | 2.32722500  |
| H  | 4.10127900  | -4.71101300 | -1.26163400 |
| H  | 4.34712100  | -4.52591200 | -1.20904100 |
| C  | 3.54029000  | 1.46759600  | -1.06421000 |
| C  | 4.92341600  | 1.48099100  | -0.79605100 |
| C  | 2.79299500  | 2.61617000  | -0.76433500 |
| C  | 5.53086100  | 2.59891300  | -0.22259900 |
| H  | 5.53103500  | 0.60989600  | -1.02758700 |
| C  | 3.40352100  | 3.73819000  | -0.19360800 |
| H  | 1.72788900  | 2.63116900  | -0.97376000 |
| C  | 4.77212100  | 3.73409700  | 0.08234100  |
| H  | 6.59725200  | 2.58261300  | -0.01422500 |
| H  | 2.80348800  | 4.61437800  | 0.03763900  |
| H  | 5.24466900  | 4.60464200  | 0.52839400  |
| Cd | 0.04683200  | -0.21795900 | 0.77687600  |
| P  | -2.80738400 | -0.07659600 | 0.57595900  |
| H  | -3.52082900 | -0.24630800 | 1.78446700  |
| C  | -3.62825300 | -1.37347100 | -0.43987800 |
| C  | -2.99057600 | -1.84053100 | -1.60063100 |
| C  | -4.87318700 | -1.91441000 | -0.07531600 |
| C  | -3.59896300 | -2.81840100 | -2.39236100 |
| H  | -2.01686100 | -1.45234300 | -1.88800700 |
| C  | -5.47254500 | -2.89895600 | -0.86354000 |
| H  | -5.37739300 | -1.56914000 | 0.82307000  |
| C  | -4.83815900 | -3.34917300 | -2.02578900 |
| H  | -3.09684100 | -3.16958300 | -3.28905700 |
| H  | -6.43310200 | -3.31291100 | -0.57019400 |
| H  | -5.30564500 | -4.11465400 | -2.63842600 |
| C  | -3.52461700 | 1.53122400  | 0.04023100  |
| C  | -4.66253000 | 2.07256300  | 0.66177600  |
| C  | -2.90794200 | 2.24409700  | -1.00154500 |
| C  | -5.18036800 | 3.29989100  | 0.24134600  |
| H  | -5.14756200 | 1.53921300  | 1.47479500  |
| C  | -3.43570400 | 3.46587800  | -1.42658900 |
| H  | -2.01246200 | 1.85424200  | -1.47905900 |
| C  | -4.57059800 | 3.99599200  | -0.80660500 |
| H  | -6.05909900 | 3.70985600  | 0.73109700  |
| H  | -2.95249900 | 4.00553800  | -2.23586800 |
| H  | -4.97479300 | 4.94946900  | -1.13413500 |
| C  | -0.82266900 | -0.12343300 | 4.07606100  |
| H  | -1.11302900 | 0.90790400  | 3.85411200  |
| H  | -1.65422800 | -0.77973900 | 3.80144700  |
| C  | -0.51488200 | -0.26904200 | 5.56708400  |
| H  | 0.30898900  | 0.38793000  | 5.86347900  |
| H  | -1.39611300 | -0.00531300 | 6.16542900  |
| H  | -0.23110200 | -1.29788500 | 5.81105200  |
| S  | 0.67652000  | -0.57641400 | 3.07860200  |

G/J-IM2

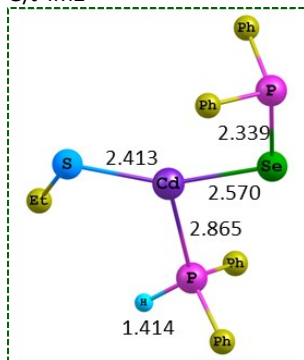

|    |            |             |             |
|----|------------|-------------|-------------|
| Se | 0.53935200 | 0.11405400  | -1.72390100 |
| P  | 2.86056100 | 0.01257000  | -1.99554500 |
| C  | 3.36063000 | -1.39423800 | -0.89905200 |
| C  | 3.51221300 | -1.30064400 | 0.49549900  |
| C  | 3.58198200 | -2.63535200 | -1.51984900 |
| C  | 3.86407300 | -2.42216000 | 1.24941300  |
| H  | 3.36206400 | -0.34934800 | 0.99790400  |
| C  | 3.93424600 | -3.75861800 | -0.76585400 |

F/K-TS1

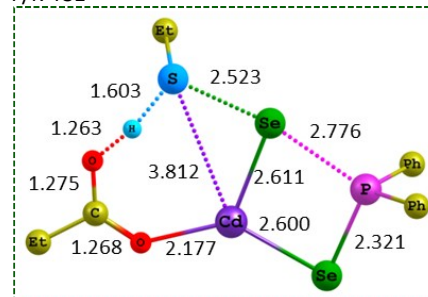

|    |             |             |             |
|----|-------------|-------------|-------------|
| Cd | -1.25530700 | -0.92552700 | -0.30135700 |
| Se | -0.44958800 | 1.20186100  | 0.98092600  |
| O  | -4.55556100 | 0.16362200  | 0.41332800  |
| O  | -3.34128800 | -1.51194600 | -0.51630500 |



|    |             |             |             |
|----|-------------|-------------|-------------|
| C  | -4.43152800 | -0.94663500 | -0.20054000 |
| C  | -5.73490300 | -1.63965300 | -0.57081300 |
| H  | -6.24509100 | -1.85659000 | 0.37651900  |
| H  | -6.35955200 | -0.88921900 | -1.06954600 |
| C  | -5.59084500 | -2.90244000 | -1.41970000 |
| H  | -6.57768500 | -3.32800000 | -1.62836100 |
| H  | -5.10381300 | -2.68661800 | -2.37515100 |
| H  | -4.99183800 | -3.66027900 | -0.90752500 |
| Se | 1.02439300  | -1.89511200 | -1.08939100 |
| P  | 1.84351600  | -0.01742200 | 0.00094600  |
| H  | -3.65518000 | 0.86397400  | 0.95462300  |
| C  | 2.81797600  | 0.91925700  | -1.24805900 |
| C  | 2.31764600  | 2.15055200  | -1.69813600 |
| C  | 4.02515700  | 0.43202000  | -1.77809400 |
| C  | 3.01505200  | 2.88593700  | -2.66210900 |
| H  | 1.38467500  | 2.53175100  | -1.29212600 |
| C  | 4.71862700  | 1.16797000  | -2.73897500 |
| H  | 4.42136500  | -0.52065300 | -1.43931800 |
| C  | 4.21469500  | 2.39638500  | -3.18310400 |
| H  | 2.62118300  | 3.83997700  | -3.00114000 |
| H  | 5.65033200  | 0.78269700  | -3.14377600 |
| H  | 4.75696100  | 2.96749000  | -3.93147100 |
| C  | 3.11865600  | -0.59596400 | 1.19738300  |
| C  | 3.14612600  | -1.90715800 | 1.69518600  |
| C  | 4.02013600  | 0.35056000  | 1.71968800  |
| C  | 4.06546900  | -2.26833800 | 2.68454300  |
| H  | 2.45680600  | -2.64725000 | 1.30095100  |
| C  | 4.93670800  | -0.01451200 | 2.70644600  |
| H  | 4.01196700  | 1.37312100  | 1.35264700  |
| C  | 4.96270600  | -1.32601800 | 3.19245600  |
| H  | 4.07996800  | -3.29002000 | 3.05389000  |
| H  | 5.62972800  | 0.72628200  | 3.09538900  |
| H  | 5.67667000  | -1.60907200 | 3.96065000  |
| C  | -3.08540200 | 3.34280800  | 0.53224000  |
| H  | -2.96080900 | 2.96841100  | -0.48791400 |
| H  | -2.30892100 | 4.09116000  | 0.71146900  |
| C  | -4.48057800 | 3.93201900  | 0.74337200  |
| H  | -4.64043900 | 4.76378000  | 0.04667800  |
| H  | -5.25984400 | 3.18478700  | 0.56474600  |
| H  | -4.60007900 | 4.31413600  | 1.76190900  |
| S  | -2.74794900 | 1.95394700  | 1.70179300  |

|    |             |             |             |
|----|-------------|-------------|-------------|
| Se | 1.10381300  | 1.14693000  | -0.40062900 |
| P  | 2.48493700  | -0.41369300 | 0.70301400  |
| H  | -4.63209400 | 0.42353000  | -0.60231300 |
| C  | 3.80148800  | 0.74500200  | 1.30163500  |
| C  | 3.67244700  | 1.22743500  | 2.61610600  |
| C  | 4.90758300  | 1.15429100  | 0.53895800  |
| C  | 4.61799100  | 2.10436300  | 3.15221900  |
| H  | 2.82661500  | 0.91236900  | 3.22235400  |
| C  | 5.85688600  | 2.02687400  | 1.07727800  |
| H  | 5.03154100  | 0.78883700  | -0.47556300 |
| C  | 5.71410400  | 2.50630300  | 2.38288200  |
| H  | 4.50197300  | 2.46780100  | 4.16962200  |
| H  | 6.70771700  | 2.33346300  | 0.47470400  |
| H  | 6.45413500  | 3.18419600  | 2.79907700  |
| C  | 3.37112800  | -1.30040100 | -0.66886300 |
| C  | 3.31646900  | -0.96892400 | -2.03010100 |
| C  | 4.12117300  | -2.42598300 | -0.27967500 |
| C  | 4.00602700  | -1.73368100 | -2.97725800 |
| H  | 2.72852600  | -0.11383900 | -2.34978300 |
| C  | 4.81798400  | -3.18345900 | -1.22340700 |
| H  | 4.16009300  | -2.71315900 | 0.76893500  |
| C  | 4.76096600  | -2.83928300 | -2.57789700 |
| H  | 3.95189200  | -1.46205700 | -4.02822300 |
| H  | 5.39469200  | -4.04666800 | -0.90252100 |
| H  | 5.29437000  | -3.43277900 | -3.31518800 |
| C  | -4.60155900 | -0.53222200 | 2.39192100  |
| H  | -3.85482600 | 0.26711500  | 2.41938900  |
| H  | -4.29807200 | -1.31094900 | 3.09586100  |
| C  | -5.99796000 | -0.00010300 | 2.71852800  |
| H  | -5.99682200 | 0.43746600  | 3.72306000  |
| H  | -6.31074900 | 0.77823500  | 2.01474100  |
| H  | -6.74436500 | -0.80021200 | 2.69900800  |
| S  | -4.60410800 | -1.28541000 | 0.70511700  |

F/K-IM2

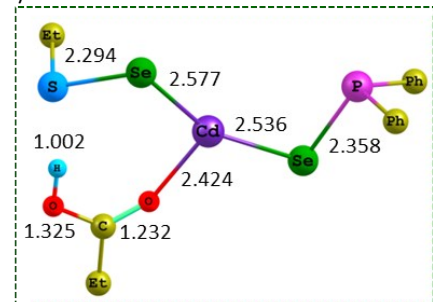

|    |             |             |             |
|----|-------------|-------------|-------------|
| Cd | -1.04990200 | -0.16384300 | -0.13179500 |
| Se | -2.50327000 | -2.18886500 | 0.52157300  |
| O  | -4.78916700 | 1.21129200  | -1.20075700 |
| O  | -2.55388300 | 1.48040300  | -1.08516500 |
| C  | -3.65927500 | 1.83558100  | -1.49733800 |
| C  | -3.86355800 | 3.03666000  | -2.39243300 |
| H  | -4.38936300 | 2.68075500  | -3.28749800 |
| H  | -4.57621400 | 3.69726600  | -1.88257600 |
| C  | -2.57422900 | 3.77272400  | -2.75359300 |
| H  | -2.80030800 | 4.62665600  | -3.39909100 |
| H  | -2.06404900 | 4.14248400  | -1.86008300 |
| H  | -1.87778900 | 3.11711400  | -3.28333300 |

K-i/K-TS1

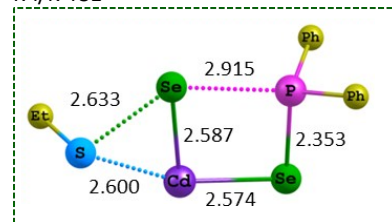

|    |             |             |             |
|----|-------------|-------------|-------------|
| Cd | 1.86277100  | -0.83459400 | 0.98128400  |
| C  | 4.66713800  | 1.01020500  | -0.30932900 |
| H  | 3.92425700  | 1.66190700  | 0.15878200  |
| H  | 5.47552700  | 0.83699800  | 0.40910100  |
| C  | 5.19911800  | 1.63214500  | -1.59875300 |
| H  | 5.94736200  | 0.98810900  | -2.07107200 |
| H  | 4.38778100  | 1.79942800  | -2.31367600 |
| H  | 5.66774400  | 2.59923000  | -1.38003000 |
| P  | -1.16435600 | 0.03269900  | -0.20604400 |
| Se | -0.52672000 | -0.71433600 | 1.93186100  |
| Se | 1.46788800  | -0.05946900 | -1.45529500 |
| C  | -1.85893300 | 1.71342300  | 0.08927700  |
| C  | -1.19041600 | 2.80756500  | -0.48132400 |
| C  | -3.00458000 | 1.94099100  | 0.87229200  |
| C  | -1.66328400 | 4.10867200  | -0.27978500 |
| H  | -0.29915600 | 2.63948500  | -1.08014900 |
| C  | -3.47264500 | 3.23936800  | 1.07318300  |
| H  | -3.52927800 | 1.10358700  | 1.32250700  |
| C  | -2.80320700 | 4.32592600  | 0.49679300  |
| H  | -1.14063400 | 4.94763500  | -0.73047300 |
| H  | -4.35827600 | 3.40483300  | 1.68039800  |
| H  | -3.17095100 | 5.33596200  | 0.65446000  |
| C  | -2.64956000 | -0.97514100 | -0.63274400 |



|   |            |             |             |
|---|------------|-------------|-------------|
| C | 4.33802200 | -3.06186500 | -2.22418100 |
| H | 2.47914800 | -1.99660700 | -2.04437700 |
| C | 6.17289400 | -2.23319200 | -0.88566000 |
| H | 5.74339300 | -0.54442400 | 0.37425100  |
| C | 5.67192400 | -3.14832400 | -1.81828900 |
| H | 3.94145700 | -3.76350000 | -2.95251900 |
| H | 7.20887300 | -2.29424600 | -0.56426000 |
| H | 6.31778500 | -3.92028000 | -2.22635200 |
| C | 3.75568500 | 1.70798500  | -0.02246300 |
| C | 4.55602500 | 2.10929700  | -1.10644400 |
| C | 3.57779300 | 2.58934700  | 1.05922100  |
| C | 5.16980700 | 3.36304100  | -1.10420800 |
| H | 4.70253800 | 1.44099500  | -1.95009100 |
| C | 4.18489900 | 3.84804600  | 1.05055600  |
| H | 2.97383300 | 2.29183200  | 1.91171900  |
| C | 4.98299400 | 4.23773100  | -0.02829400 |
| H | 5.78906500 | 3.65898500  | -1.94647300 |
| H | 4.03894700 | 4.51863900  | 1.89257100  |
| H | 5.45771700 | 5.21465500  | -0.03115500 |
| S | 1.44512600 | -0.33695500 | 3.02537600  |

|   |            |             |             |
|---|------------|-------------|-------------|
| H | 5.81381600 | -3.53616700 | -2.56609800 |
| P | 2.74295000 | 0.78976300  | -0.00131800 |
| C | 2.69693200 | 2.52156500  | -0.60464800 |
| C | 1.46251900 | 3.17098700  | -0.76160300 |
| C | 3.88264200 | 3.20730800  | -0.92559800 |
| C | 1.41616700 | 4.49028300  | -1.22454100 |
| H | 0.53471800 | 2.65358100  | -0.53217500 |
| C | 3.83128300 | 4.52123400  | -1.39176000 |
| H | 4.84487800 | 2.71666600  | -0.80666600 |
| C | 2.59700900 | 5.16480200  | -1.54037400 |
| H | 0.45528500 | 4.98247900  | -1.34184200 |
| H | 4.75181300 | 5.04173600  | -1.63995200 |
| H | 2.55874600 | 6.18743700  | -1.90466000 |
| C | 3.49638700 | 0.84185200  | 1.67703300  |
| C | 3.33046500 | 1.95100800  | 2.51912100  |
| C | 4.17439500 | -0.29373200 | 2.15167200  |
| C | 3.84866500 | 1.92860400  | 3.81718700  |
| H | 2.80705500 | 2.83452000  | 2.16577600  |
| C | 4.69389500 | -0.30694000 | 3.44776700  |
| H | 4.29495400 | -1.16449600 | 1.51177900  |
| C | 4.53158700 | 0.80250400  | 4.28368600  |
| H | 3.71744300 | 2.79346300  | 4.46120100  |
| H | 5.22243500 | -1.18661500 | 3.80374400  |
| H | 4.93342800 | 0.78796000  | 5.29261200  |
| S | 3.45292400 | -2.96309600 | -0.86660700 |

E-i/K-IM2

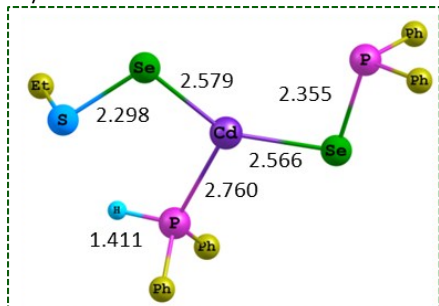

|    |             |             |             |
|----|-------------|-------------|-------------|
| Cd | 0.46443600  | -0.75568300 | -0.19786500 |
| Se | 1.16134600  | -3.13427800 | -0.91042100 |
| Se | -1.49328900 | 0.74889500  | 0.49909800  |
| P  | -3.22648700 | -0.69909700 | -0.16973400 |
| C  | -4.19210400 | 0.40413800  | -1.30393900 |
| C  | -4.23614400 | 0.04651900  | -2.66093900 |
| C  | -4.85653600 | 1.57210300  | -0.89098200 |
| C  | -4.92874700 | 0.83463700  | -3.58679900 |
| H  | -3.72733400 | -0.85480400 | -2.99401900 |
| C  | -5.54857000 | 2.35826000  | -1.81264500 |
| H  | -4.83266900 | 1.86507100  | 0.15465400  |
| C  | -5.58628700 | 1.99159200  | -3.16373900 |
| H  | -4.95570400 | 0.54189600  | -4.63286900 |
| H  | -6.05878300 | 3.25787500  | -1.47871400 |
| H  | -6.12695900 | 2.60483600  | -3.87942700 |
| C  | -4.33157000 | -0.72372400 | 1.32270000  |
| C  | -3.85332400 | -0.57568200 | 2.63377900  |
| C  | -5.68418600 | -1.07130000 | 1.13894200  |
| C  | -4.70411200 | -0.75610600 | 3.72928900  |
| H  | -2.81513800 | -0.30508800 | 2.79893200  |
| C  | -6.53255700 | -1.24886900 | 2.23310200  |
| H  | -6.08206900 | -1.19764200 | 0.13555100  |
| C  | -6.04572100 | -1.09167700 | 3.53503600  |
| H  | -4.31391900 | -0.62951900 | 4.73572900  |
| H  | -7.57458400 | -1.50904800 | 2.06730800  |
| H  | -6.70576600 | -1.22996500 | 4.38679100  |
| H  | 3.82209900  | 0.26951800  | -0.74616900 |
| C  | 3.85610200  | -2.57665000 | -2.62489800 |
| H  | 3.41907500  | -1.60673100 | -2.88483000 |
| H  | 3.38942200  | -3.33796300 | -3.25546700 |
| C  | 5.37452400  | -2.56439100 | -2.81274600 |
| H  | 5.61727700  | -2.33813000 | -3.85725900 |
| H  | 5.85358900  | -1.80552700 | -2.18457800 |

C/M-IM1

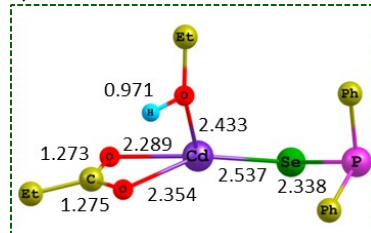

|    |             |             |             |
|----|-------------|-------------|-------------|
| Cd | -1.24653900 | -0.08600500 | 0.77845300  |
| P  | 2.55248300  | 0.83394700  | 0.94848400  |
| Se | 0.71529500  | 0.37258600  | 2.31961900  |
| C  | 2.87403800  | -0.72736500 | -0.00012800 |
| C  | 2.72416100  | -1.98648100 | 0.60753900  |
| C  | 3.48431700  | -0.66826400 | -1.26747700 |
| C  | 3.15683300  | -3.14923000 | -0.03630100 |
| H  | 2.26244300  | -2.05523100 | 1.58839300  |
| C  | 3.91024100  | -1.83207100 | -1.91310600 |
| H  | 3.62767300  | 0.28952500  | -1.75881900 |
| C  | 3.74953700  | -3.07842800 | -1.30079300 |
| H  | 3.03372900  | -4.11094500 | 0.45517100  |
| H  | 4.37192700  | -1.76141100 | -2.89437500 |
| H  | 4.08796200  | -3.98212000 | -1.79985600 |
| C  | 1.89065000  | 1.97736200  | -0.34822700 |
| C  | 2.24019800  | 3.33205100  | -0.22298100 |
| C  | 1.05499900  | 1.59133400  | -1.41144400 |
| C  | 1.76131300  | 4.28186700  | -1.13108500 |
| H  | 2.88731600  | 3.64404100  | 0.59276000  |
| C  | 0.57790600  | 2.53899800  | -2.31885400 |
| H  | 0.77734000  | 0.54844700  | -1.53763200 |
| C  | 0.92838100  | 3.88703200  | -2.18025500 |
| H  | 2.03947900  | 5.32589100  | -1.01724100 |
| H  | -0.07212200 | 2.22630300  | -3.13147600 |
| H  | 0.55339700  | 4.62246200  | -2.88648500 |
| C  | -0.57710600 | -2.74229300 | -1.59300000 |
| H  | -0.39701500 | -2.79615500 | -2.67373100 |
| H  | 0.37452400  | -2.91567600 | -1.08650100 |
| C  | -1.63141000 | -3.75098900 | -1.15825100 |
| H  | -1.80841000 | -3.69443400 | -0.07951700 |
| H  | -2.58470500 | -3.58149400 | -1.67220900 |

|   |             |             |             |
|---|-------------|-------------|-------------|
| H | -1.29852700 | -4.76691700 | -1.39929500 |
| O | -3.45869000 | -0.54629400 | 1.14285800  |
| O | -2.94418000 | 0.49298700  | -0.74584300 |
| C | -3.81249000 | 0.00616200  | 0.05152600  |
| C | -5.29448500 | 0.08402700  | -0.27413600 |
| H | -5.70805000 | -0.92161600 | -0.13345100 |
| H | -5.74908800 | 0.69565200  | 0.51572600  |
| C | -5.63175300 | 0.64199200  | -1.65739500 |
| H | -6.71739600 | 0.68643700  | -1.79381900 |
| H | -5.22559000 | 1.64876800  | -1.78672400 |
| H | -5.21597400 | 0.01567500  | -2.45289600 |
| H | -1.74335000 | -1.10037100 | -1.71309500 |
| O | -0.93474500 | -1.38418700 | -1.25561200 |

|   |             |             |             |
|---|-------------|-------------|-------------|
| H | -7.53436500 | -1.20742200 | 0.65720300  |
| H | -7.27990600 | 0.29182400  | -0.26041600 |
| H | -6.77587500 | -1.25058700 | -0.94761100 |
| H | -2.81174100 | -0.44111200 | 1.05582600  |
| O | -1.78687200 | -1.17418500 | 1.31743800  |

C/M-TS1

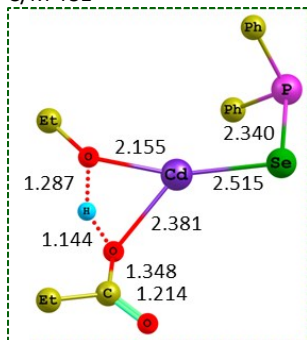

|    |             |             |             |
|----|-------------|-------------|-------------|
| Cd | -0.99597500 | -0.06758400 | -0.35423200 |
| P  | 2.57354400  | 0.86433200  | -1.18734400 |
| Se | 0.48727500  | 0.70157100  | -2.23406600 |
| C  | 2.16548200  | 1.73087700  | 0.40067100  |
| C  | 1.72714900  | 1.08852300  | 1.57227700  |
| C  | 2.29298300  | 3.13010500  | 0.40812900  |
| C  | 1.41330500  | 1.82871100  | 2.71520800  |
| H  | 1.65467300  | 0.00471200  | 1.60198200  |
| C  | 1.97246200  | 3.87132800  | 1.54888200  |
| H  | 2.63810000  | 3.64129100  | -0.48690400 |
| C  | 1.53046100  | 3.22271400  | 2.70494500  |
| H  | 1.08333700  | 1.31689600  | 3.61530200  |
| H  | 2.07207900  | 4.95293700  | 1.53444300  |
| H  | 1.28487300  | 3.79680200  | 3.59367400  |
| C  | 2.99525500  | -0.84189200 | -0.59519100 |
| C  | 4.06450600  | -0.96712300 | 0.31428800  |
| C  | 2.42859400  | -2.01137300 | -1.12399500 |
| C  | 4.52862300  | -2.22425100 | 0.70350500  |
| H  | 4.53548700  | -0.07845700 | 0.72696100  |
| C  | 2.89843800  | -3.27153800 | -0.73681300 |
| H  | 1.62079500  | -1.93841400 | -1.84571500 |
| C  | 3.94543500  | -3.38346300 | 0.17975900  |
| H  | 5.34845200  | -2.29795200 | 1.41276600  |
| H  | 2.44263300  | -4.16430100 | -1.15622400 |
| H  | 4.30908300  | -4.36199700 | 0.47985600  |
| C  | -1.27751900 | -1.48953600 | 2.60726500  |
| H  | -0.80142600 | -0.60823100 | 3.06432100  |
| H  | -2.12984400 | -1.76225200 | 3.24624700  |
| C  | -0.29025600 | -2.64938900 | 2.54373000  |
| H  | -0.77065800 | -3.53833600 | 2.12256500  |
| H  | 0.57269300  | -2.40133300 | 1.91526800  |
| H  | 0.07973500  | -2.89651500 | 3.54591600  |
| O  | -3.24263800 | 0.32954600  | 0.32861100  |
| O  | -4.71217500 | 0.67394200  | -1.32296800 |
| C  | -4.46323700 | 0.20808700  | -0.22965200 |
| C  | -5.47713400 | -0.52451800 | 0.64005800  |
| H  | -5.04979200 | -1.50209000 | 0.90209000  |
| H  | -5.55428100 | 0.02788700  | 1.58595100  |
| C  | -6.84859200 | -0.68261600 | -0.01583600 |

C/M-IM2

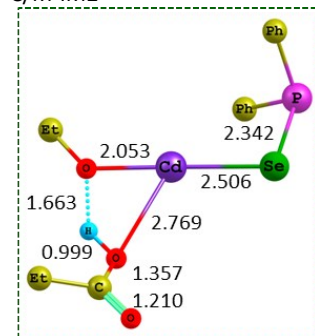

|    |             |             |             |
|----|-------------|-------------|-------------|
| Cd | -0.89761100 | 0.04535300  | -0.10346400 |
| P  | 2.62000900  | 0.08500300  | -1.48387800 |
| Se | 0.44016700  | -0.43311900 | -2.16729500 |
| C  | 2.35930100  | 1.56145300  | -0.39223900 |
| C  | 2.14644400  | 1.50067900  | 0.99664700  |
| C  | 2.37596800  | 2.82151000  | -1.01618100 |
| C  | 1.94347500  | 2.66925200  | 1.73721700  |
| H  | 2.16100000  | 0.54160100  | 1.50641200  |
| C  | 2.16392400  | 3.98779000  | -0.27720600 |
| H  | 2.54886000  | 2.88694100  | -2.08736000 |
| C  | 1.94670100  | 3.91500200  | 1.10206800  |
| H  | 1.78852200  | 2.60528600  | 2.81084900  |
| H  | 2.17510800  | 4.95203000  | -0.77739800 |
| H  | 1.78789500  | 4.82165600  | 1.67869000  |
| C  | 3.10465100  | -1.21819900 | -0.25596300 |
| C  | 4.33292000  | -1.03370200 | 0.40986900  |
| C  | 2.41474200  | -2.42358900 | -0.06255900 |
| C  | 4.83514300  | -2.01224700 | 1.26837500  |
| H  | 4.90082900  | -0.11822900 | 0.26115500  |
| C  | 2.92324400  | -3.40791700 | 0.79307500  |
| H  | 1.48240600  | -2.60072900 | -0.58960900 |
| C  | 4.12983400  | -3.20497800 | 1.46475200  |
| H  | 5.77956400  | -1.84551700 | 1.77902900  |
| H  | 2.37250800  | -4.33474700 | 0.92891900  |
| H  | 4.52324300  | -3.96969300 | 2.12827200  |
| C  | -1.57776600 | 0.64418200  | 2.88447200  |
| H  | -0.91155700 | 1.52093500  | 2.91370000  |
| H  | -2.45922900 | 0.89625400  | 3.49303200  |
| C  | -0.87064300 | -0.56473800 | 3.49427700  |
| H  | -1.53260600 | -1.43712100 | 3.50022200  |
| H  | 0.02903700  | -0.82488400 | 2.92147500  |
| H  | -0.56146100 | -0.35799800 | 4.52631400  |
| O  | -3.63202700 | 0.38888200  | -0.37407800 |
| O  | -5.21244400 | -0.44822000 | -1.70374600 |
| C  | -4.84884300 | -0.17504600 | -0.58296500 |
| C  | -5.67493700 | -0.40165800 | 0.67695100  |
| H  | -5.06793000 | -0.98949200 | 1.37870700  |
| H  | -5.82169600 | 0.57571900  | 1.15679300  |
| C  | -7.01667200 | -1.08161100 | 0.40656500  |
| H  | -7.57220100 | -1.21098200 | 1.34083800  |
| H  | -7.62462500 | -0.48701400 | -0.28034300 |
| H  | -6.87319600 | -2.06467800 | -0.05035000 |
| H  | -3.37929400 | 0.48547500  | 0.58778300  |
| O  | -2.03685700 | 0.40585600  | 1.56562700  |

M

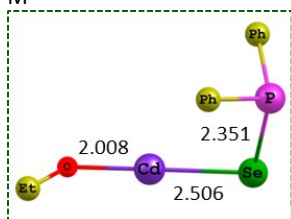

|    |             |             |             |
|----|-------------|-------------|-------------|
| Se | -0.37794100 | -1.18787400 | -1.94308200 |
| P  | -1.81292700 | 0.54461900  | -1.26100200 |
| C  | -0.63063400 | 1.79984800  | -0.57713800 |
| C  | -0.10932500 | 1.76949400  | 0.72972300  |
| C  | -0.22344800 | 2.83015800  | -1.44139400 |
| C  | 0.80698900  | 2.73624800  | 1.15292300  |
| H  | -0.43530800 | 1.00297000  | 1.42791300  |
| C  | 0.69496500  | 3.79573400  | -1.01876200 |
| H  | -0.62399200 | 2.87216600  | -2.45102700 |
| C  | 1.21366000  | 3.74976000  | 0.27819500  |
| H  | 1.19866500  | 2.69843500  | 2.16553000  |
| H  | 1.00059300  | 4.58426400  | -1.70066800 |
| H  | 1.92553100  | 4.50074700  | 0.60849000  |
| C  | -2.63852900 | -0.06461500 | 0.28469900  |
| C  | -3.37166000 | 0.87878900  | 1.03169100  |
| C  | -2.70377200 | -1.41352800 | 0.66239700  |
| C  | -4.12153200 | 0.48487300  | 2.14049900  |
| H  | -3.35316700 | 1.92945000  | 0.75209700  |
| C  | -3.46163400 | -1.80799700 | 1.77087500  |
| H  | -2.16222200 | -2.15955000 | 0.08911500  |
| C  | -4.16849600 | -0.86236200 | 2.51563100  |
| H  | -4.67104700 | 1.22985100  | 2.70933900  |
| H  | -3.49558100 | -2.85780400 | 2.04912200  |
| H  | -4.75479900 | -1.16972000 | 3.37679200  |
| Cd | 1.43043100  | -1.04714600 | -0.21380800 |
| C  | 3.96036600  | -0.16843000 | 1.20881700  |
| H  | 4.57454800  | -0.25098200 | 0.29574200  |
| H  | 3.61040400  | 0.87653900  | 1.26582800  |
| C  | 4.82986600  | -0.47583100 | 2.42563300  |
| H  | 5.20909800  | -1.50166800 | 2.37392400  |
| H  | 5.68451400  | 0.21087400  | 2.47431100  |
| H  | 4.24714800  | -0.37429500 | 3.34723500  |
| O  | 2.87099500  | -1.07783600 | 1.18451600  |

M-i

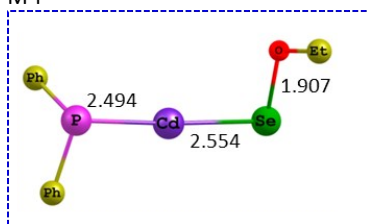

|    |             |             |             |
|----|-------------|-------------|-------------|
| Cd | 0.73625700  | -0.18192100 | 0.03923500  |
| Se | 3.06748500  | -0.33910600 | -0.99187100 |
| C  | 4.61552200  | 0.41168100  | 1.24799200  |
| H  | 4.17773300  | -0.46313400 | 1.75251000  |
| H  | 4.69514900  | 1.22163300  | 1.98568300  |
| C  | 5.99072700  | 0.07345300  | 0.68414900  |
| H  | 6.43022900  | 0.94808000  | 0.19410400  |
| H  | 6.66168000  | -0.24837000 | 1.48974000  |
| H  | 5.92744900  | -0.73992200 | -0.04643900 |
| P  | -1.44250800 | 0.02933100  | 1.23376500  |
| C  | -2.15308800 | 1.53715200  | 0.41453000  |
| C  | -2.74889400 | 2.49247300  | 1.25718200  |
| C  | -2.11125900 | 1.80630700  | -0.96720900 |
| C  | -3.28620100 | 3.67589300  | 0.73899900  |
| H  | -2.79130400 | 2.30657000  | 2.32700100  |

|   |             |             |             |
|---|-------------|-------------|-------------|
| C | -2.64843800 | 2.98532700  | -1.48719000 |
| H | -1.66029000 | 1.08650000  | -1.64572200 |
| C | -3.23683400 | 3.92536700  | -0.63380400 |
| H | -3.74046200 | 4.39985800  | 1.40974800  |
| H | -2.60199500 | 3.17278100  | -2.55641600 |
| H | -3.64973400 | 4.84520600  | -1.03797100 |
| C | -2.36771700 | -1.38932500 | 0.47030000  |
| C | -3.51162900 | -1.24539600 | -0.33247800 |
| C | -1.95887900 | -2.69314900 | 0.81623300  |
| C | -4.21321300 | -2.36847700 | -0.78457200 |
| H | -3.86316300 | -0.25608100 | -0.60585400 |
| C | -2.65343100 | -3.81200300 | 0.35698500  |
| H | -1.09095000 | -2.83545900 | 1.45770100  |
| C | -3.78712900 | -3.65509800 | -0.44883800 |
| H | -5.09641000 | -2.23154000 | -1.40299800 |
| H | -2.31346400 | -4.80640100 | 0.63347900  |
| H | -4.33172800 | -4.52469800 | -0.80488500 |
| O | 3.70910600  | 0.93519600  | 0.27381500  |

M-ii

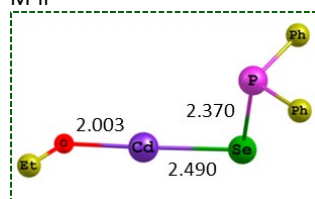

|    |             |             |             |
|----|-------------|-------------|-------------|
| Se | 0.21583800  | -0.07031200 | -1.41376800 |
| P  | -0.95546900 | 0.00948800  | 0.65150900  |
| C  | -2.15114200 | -1.38032500 | 0.41472300  |
| C  | -3.18543100 | -1.37475100 | -0.53747000 |
| C  | -1.98742000 | -2.51057800 | 1.23193500  |
| C  | -4.03410600 | -2.47443400 | -0.66581000 |
| H  | -3.32774500 | -0.50856400 | -1.17715600 |
| C  | -2.83823200 | -3.61326300 | 1.10345300  |
| H  | -1.19259100 | -2.52677900 | 1.97357100  |
| C  | -3.86218600 | -3.59646400 | 0.15401600  |
| H  | -4.82880800 | -2.45846100 | -1.40658900 |
| H  | -2.70114000 | -4.47943800 | 1.74466500  |
| H  | -4.52479600 | -4.45126500 | 0.05172700  |
| C  | -2.05802400 | 1.48403300  | 0.42979800  |
| C  | -3.21335200 | 1.55966400  | 1.23223900  |
| C  | -1.72245100 | 2.59057700  | -0.36521700 |
| C  | -4.01385000 | 2.70295000  | 1.22584800  |
| H  | -3.49611000 | 0.71991900  | 1.86140800  |
| C  | -2.52576200 | 3.73570500  | -0.36951200 |
| H  | -0.83956600 | 2.55438700  | -0.99545600 |
| C  | -3.67316100 | 3.79713300  | 0.42380000  |
| H  | -4.90503400 | 2.73680400  | 1.84651000  |
| H  | -2.25261000 | 4.57768200  | -0.99978700 |
| H  | -4.29684400 | 4.68646100  | 0.41784800  |
| Cd | 2.45977900  | -0.16038200 | -0.33862600 |
| C  | 5.05364500  | 0.65161500  | 1.01356900  |
| H  | 5.24437100  | 1.45378500  | 0.28048500  |
| H  | 4.52914100  | 1.11383900  | 1.86682700  |
| C  | 6.38630800  | 0.08202700  | 1.49234200  |
| H  | 6.93541000  | -0.36013500 | 0.65459700  |
| H  | 7.00524800  | 0.87018100  | 1.93941100  |
| H  | 6.22010500  | -0.69863200 | 2.24184800  |
| O  | 4.28826100  | -0.40081000 | 0.44341800  |



E/M-IM1

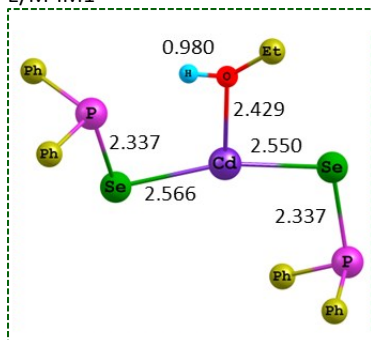

|    |             |             |             |
|----|-------------|-------------|-------------|
| Se | -2.80693800 | -0.97844400 | 1.86959000  |
| P  | -4.45439300 | -0.45504400 | 0.29679000  |
| C  | -3.80988400 | -1.20271700 | -1.27173600 |
| C  | -2.88597300 | -0.58414300 | -2.13229800 |
| C  | -4.28253800 | -2.48458500 | -1.60092900 |
| C  | -2.44015600 | -1.23545100 | -3.28489900 |
| H  | -2.52184700 | 0.41522900  | -1.91170700 |
| C  | -3.83304800 | -3.13916200 | -2.75110800 |
| H  | -5.00317800 | -2.97269200 | -0.94955800 |
| C  | -2.91010100 | -2.51596500 | -3.59555400 |
| H  | -1.72393900 | -0.74339800 | -3.93712100 |
| H  | -4.20713700 | -4.13125700 | -2.98844700 |
| H  | -2.56095200 | -3.02180300 | -4.49133700 |
| C  | -4.27654200 | 1.35975700  | -0.04968700 |
| C  | -4.95218300 | 1.87888600  | -1.17209400 |
| C  | -3.65565600 | 2.26061200  | 0.82843900  |
| C  | -4.97833400 | 3.25184100  | -1.42059000 |
| H  | -5.45581900 | 1.20734100  | -1.86286300 |
| C  | -3.68649400 | 3.63751400  | 0.58112800  |
| H  | -3.14678300 | 1.88322700  | 1.71015400  |
| C  | -4.34313100 | 4.13865200  | -0.54436000 |
| H  | -5.49608000 | 3.62861200  | -2.29854100 |
| H  | -3.19418600 | 4.31662800  | 1.27222900  |
| H  | -4.36468800 | 5.20754900  | -0.73674800 |
| Cd | -0.58797000 | -0.52961400 | 0.69576100  |
| Se | 1.18618000  | -0.13906500 | -1.11579400 |
| H  | 1.74167500  | -0.13411300 | 2.31949300  |
| C  | 0.62780800  | -0.01466500 | 4.00073300  |
| H  | -0.42701200 | -0.23035300 | 4.18941500  |
| H  | 0.76804000  | 1.07136600  | 4.08116600  |
| C  | 1.52457300  | -0.75883200 | 4.98085900  |
| H  | 2.58271700  | -0.54449800 | 4.79329400  |
| H  | 1.29511800  | -0.45153900 | 6.00767500  |
| H  | 1.37184800  | -1.83926400 | 4.90000600  |
| P  | 3.00648900  | 0.22410200  | 0.30421500  |
| C  | 3.74217200  | 1.77089100  | -0.38492200 |
| C  | 4.38306000  | 1.83046300  | -1.63422900 |
| C  | 3.63066900  | 2.94485000  | 0.37683200  |
| C  | 4.90155500  | 3.03691900  | -2.10587900 |
| H  | 4.47681300  | 0.93200100  | -2.23691500 |
| C  | 4.14867200  | 4.15455800  | -0.09627600 |
| H  | 3.13797300  | 2.91319800  | 1.34547100  |
| C  | 4.78541900  | 4.20186100  | -1.33844400 |
| H  | 5.39417500  | 3.06976700  | -3.07374700 |
| H  | 4.05656000  | 5.05443000  | 0.50546200  |
| H  | 5.19015400  | 5.13974900  | -1.70824000 |
| C  | 4.24989800  | -1.05342900 | -0.20059400 |
| C  | 5.58528400  | -0.86203100 | 0.20416800  |
| C  | 3.90701500  | -2.25376800 | -0.83916300 |
| C  | 6.55059500  | -1.84041600 | -0.03740100 |
| H  | 5.87714700  | 0.05854500  | 0.70327900  |
| C  | 4.87578200  | -3.23482600 | -1.07715600 |
| H  | 2.88352100  | -2.41677200 | -1.16183400 |

|   |            |             |             |
|---|------------|-------------|-------------|
| C | 6.19869800 | -3.03288300 | -0.67931100 |
| H | 7.57716300 | -1.67092000 | 0.27586000  |
| H | 4.59162100 | -4.15577900 | -1.57901400 |
| H | 6.94981000 | -3.79504800 | -0.86632000 |
| O | 0.86390600 | -0.42910900 | 2.64063300  |

E/M-TS1

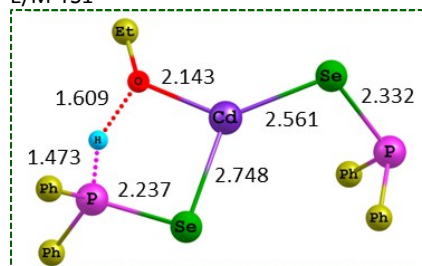

|    |             |             |             |
|----|-------------|-------------|-------------|
| Se | -2.94466200 | -2.12132100 | -0.34597000 |
| P  | -4.24824100 | -0.30863600 | 0.32876200  |
| C  | -3.80626900 | 1.02691900  | -0.88064300 |
| C  | -2.66474700 | 1.84304400  | -0.79689500 |
| C  | -4.68257000 | 1.20715500  | -1.96401200 |
| C  | -2.40483800 | 2.80554300  | -1.77506600 |
| H  | -1.97811300 | 1.73429100  | 0.03761200  |
| C  | -4.42123000 | 2.16723700  | -2.94617100 |
| H  | -5.57299800 | 0.58802000  | -2.03911900 |
| C  | -3.28067700 | 2.96890200  | -2.85422500 |
| H  | -1.51716300 | 3.42756100  | -1.69498000 |
| H  | -5.10939800 | 2.29002600  | -3.77802100 |
| H  | -3.07620300 | 3.71780900  | -3.61438400 |
| C  | -3.49198200 | 0.32946100  | 1.89831000  |
| C  | -3.85567600 | 1.61869300  | 2.33514800  |
| C  | -2.71975000 | -0.47020600 | 2.75497800  |
| C  | -3.43673200 | 2.09859900  | 3.57711600  |
| H  | -4.46446600 | 2.25666800  | 1.69972300  |
| C  | -2.30279600 | 0.01053900  | 4.00084900  |
| H  | -2.44233700 | -1.47319800 | 2.44523000  |
| C  | -2.65605200 | 1.29607900  | 4.41598700  |
| H  | -3.72156600 | 3.09981100  | 3.88948200  |
| H  | -1.69796100 | -0.62349500 | 4.64350300  |
| H  | -2.32990600 | 1.66939200  | 5.38264900  |
| Cd | -0.54561400 | -1.24047100 | -0.51217000 |
| Se | 0.86711500  | 0.36318500  | 1.21538600  |
| C  | 0.98145700  | -2.04999000 | -3.18187500 |
| H  | 1.96365300  | -1.93085900 | -3.67032700 |
| H  | 0.27051300  | -1.43169300 | -3.75486300 |
| C  | 0.55726000  | -3.51647200 | -3.26434500 |
| H  | -0.43785000 | -3.66085500 | -2.82709100 |
| H  | 0.51846300  | -3.85336700 | -4.30809100 |
| H  | 1.26466800  | -4.15311600 | -2.72135200 |
| P  | 2.66210300  | 0.21970900  | -0.11198800 |
| C  | 4.01619600  | -0.75292200 | 0.61764000  |
| C  | 4.88972400  | -0.20833900 | 1.57221800  |
| C  | 4.14432200  | -2.09940400 | 0.23895800  |
| C  | 5.88925600  | -1.00296300 | 2.13462400  |
| H  | 4.79199600  | 0.83065600  | 1.87373800  |
| C  | 5.14686700  | -2.88944300 | 0.80749600  |
| H  | 3.46006600  | -2.52414300 | -0.49086200 |
| C  | 6.01884400  | -2.34310600 | 1.75302700  |
| H  | 6.56426600  | -0.57809200 | 2.87181300  |
| H  | 5.24505100  | -3.92962300 | 0.51092600  |
| H  | 6.79720000  | -2.95932700 | 2.19378000  |
| C  | 3.34738500  | 1.85782700  | -0.55047500 |
| C  | 4.53888300  | 1.91890400  | -1.29536900 |
| C  | 2.68443100  | 3.04257400  | -0.20517200 |
| C  | 5.05514200  | 3.15411300  | -1.68797400 |

|   |            |             |             |
|---|------------|-------------|-------------|
| H | 5.06518400 | 1.00753400  | -1.56559500 |
| C | 3.20862600 | 4.27767600  | -0.59838900 |
| H | 1.76542400 | 2.99501000  | 0.37098800  |
| C | 4.39091500 | 4.33550200  | -1.33961700 |
| H | 5.97476600 | 3.19396300  | -2.26441700 |
| H | 2.69118900 | 5.19201300  | -0.32299100 |
| H | 4.79557200 | 5.29600000  | -1.64534600 |
| H | 2.17225700 | -0.54570700 | -1.27110000 |
| O | 1.09373600 | -1.59221200 | -1.84690400 |

|   |             |             |             |
|---|-------------|-------------|-------------|
| C | -5.42749000 | 0.88508500  | 0.06773400  |
| C | -3.84819800 | 2.63966000  | -0.50163800 |
| C | -6.46644200 | 1.81605900  | 0.04784400  |
| H | -5.64398200 | -0.15511000 | 0.29436800  |
| C | -4.89470600 | 3.56624800  | -0.52481000 |
| H | -2.83063400 | 2.95690700  | -0.70828300 |
| C | -6.20150300 | 3.15735200  | -0.24998300 |
| H | -7.48094100 | 1.49394700  | 0.26341600  |
| H | -4.68476800 | 4.60627600  | -0.75632300 |
| H | -7.01249900 | 3.87967000  | -0.26648700 |
| H | -2.56668100 | -0.36583200 | 1.24413400  |
| O | -1.24759300 | -1.13488900 | 2.26054200  |

E/M-IM2

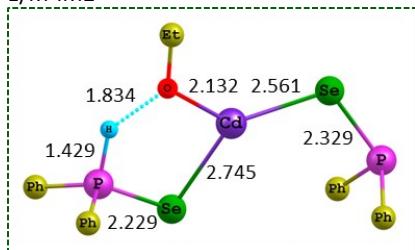

|    |             |             |             |
|----|-------------|-------------|-------------|
| Se | 2.92505200  | -0.32302600 | 2.12153900  |
| P  | 4.32506300  | 0.33256000  | 0.37930300  |
| C  | 3.49709000  | 1.81331600  | -0.36813500 |
| C  | 2.64037500  | 1.78029600  | -1.48134200 |
| C  | 3.79102800  | 3.05849400  | 0.21659100  |
| C  | 2.08895900  | 2.96005100  | -1.99014600 |
| H  | 2.40678500  | 0.83411500  | -1.95921700 |
| C  | 3.23135900  | 4.23568800  | -0.28441400 |
| H  | 4.46081600  | 3.10285600  | 1.07183500  |
| C  | 2.37944300  | 4.18986400  | -1.39243600 |
| H  | 1.42884500  | 2.91448600  | -2.85211200 |
| H  | 3.46816300  | 5.18736700  | 0.18354900  |
| H  | 1.94904600  | 5.10515200  | -1.78929500 |
| C  | 4.13680100  | -0.93060400 | -0.96830800 |
| C  | 4.84063300  | -0.69176500 | -2.16570300 |
| C  | 3.46861400  | -2.15423300 | -0.82295800 |
| C  | 4.84607500  | -1.63426800 | -3.19454500 |
| H  | 5.38619600  | 0.23963600  | -2.29825000 |
| C  | 3.47979200  | -3.10290900 | -1.85202400 |
| H  | 2.94569300  | -2.37069300 | 0.10348600  |
| C  | 4.16287800  | -2.84620000 | -3.04198800 |
| H  | 5.38837600  | -1.42475500 | -4.11270700 |
| H  | 2.95309000  | -4.04409700 | -1.71776900 |
| H  | 4.17124500  | -3.58310300 | -3.84022300 |
| Cd | 0.48279500  | -0.28407900 | 1.35160800  |
| Se | -0.79942800 | 0.89293000  | -0.77101700 |
| C  | -1.22634700 | -1.63340500 | 3.58394200  |
| H  | -0.89274400 | -0.86027700 | 4.29791700  |
| H  | -0.51378700 | -2.47177700 | 3.67486900  |
| C  | -2.61644500 | -2.11695500 | 4.00000400  |
| H  | -2.96598600 | -2.91287100 | 3.33207100  |
| H  | -2.60347400 | -2.51116300 | 5.02394900  |
| H  | -3.33963100 | -1.29387900 | 3.96019500  |
| P  | -2.75995500 | 0.07006100  | -0.10314600 |
| C  | -3.28774800 | -1.42515600 | -0.99147900 |
| C  | -3.90689000 | -1.35774300 | -2.24941400 |
| C  | -3.00865200 | -2.67231000 | -0.40857400 |
| C  | -4.25537600 | -2.53363400 | -2.91459900 |
| H  | -4.11894700 | -0.39523800 | -2.70616500 |
| C  | -3.36115300 | -3.84450700 | -1.08244000 |
| H  | -2.51243500 | -2.71589200 | 0.55799400  |
| C  | -3.98348900 | -3.77666800 | -2.33193400 |
| H  | -4.73622500 | -2.48043300 | -3.88694500 |
| H  | -3.14793000 | -4.80875000 | -0.63040900 |
| H  | -4.25531400 | -4.68994500 | -2.85336600 |
| C  | -4.11086100 | 1.29528400  | -0.20788500 |

F/N-i-IM1

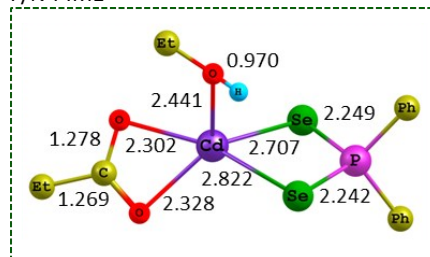

|    |             |             |             |
|----|-------------|-------------|-------------|
| Cd | 1.75009900  | 0.01897700  | 0.10087300  |
| P  | -1.59111700 | -0.15405200 | 0.01133400  |
| Se | -0.30008400 | -0.22150900 | 1.85222600  |
| Se | -0.30911000 | -0.07920500 | -1.82657000 |
| C  | -2.73342100 | 1.28234300  | 0.09631900  |
| C  | -3.44159300 | 1.51758800  | 1.28672000  |
| C  | -2.92206200 | 2.13153900  | -1.00172600 |
| C  | -4.33690100 | 2.58390100  | 1.36829700  |
| H  | -3.28907300 | 0.87642100  | 2.14982500  |
| C  | -3.81968900 | 3.20065400  | -0.91370900 |
| H  | -2.36628800 | 1.95944700  | -1.91844900 |
| C  | -4.52721500 | 3.42799100  | 0.26839500  |
| H  | -4.87904500 | 2.76045100  | 2.29269800  |
| H  | -3.96056700 | 3.85428800  | -1.76975600 |
| H  | -5.22074300 | 4.26124800  | 0.33651600  |
| C  | -2.68933000 | -1.62443800 | -0.04937800 |
| C  | -3.91047500 | -1.55821600 | -0.73988300 |
| C  | -2.28669200 | -2.83409100 | 0.53392800  |
| C  | -4.71820000 | -2.69228500 | -0.84169500 |
| H  | -4.23550200 | -0.62737200 | -1.19390400 |
| C  | -3.09857300 | -3.96530200 | 0.42721900  |
| H  | -1.34759600 | -2.88632100 | 1.07562100  |
| C  | -4.31375600 | -3.89735100 | -0.25964300 |
| H  | -5.66256200 | -2.63230800 | -1.37492800 |
| H  | -2.78078600 | -4.89771900 | 0.88457200  |
| H  | -4.94425400 | -4.77827400 | -0.33937200 |
| C  | 2.88882400  | 3.27586700  | -0.82888100 |
| H  | 3.57583100  | 2.82774600  | -1.55799700 |
| H  | 2.47891300  | 4.19836400  | -1.25798800 |
| C  | 3.59679600  | 3.55483300  | 0.48438000  |
| H  | 2.90838500  | 4.00957400  | 1.20371600  |
| H  | 3.99756300  | 2.63009300  | 0.90822800  |
| H  | 4.42753600  | 4.24867800  | 0.31390300  |
| O  | 3.93964500  | 0.18142900  | 0.79335400  |
| O  | 3.37459900  | -1.54538600 | -0.47503900 |
| C  | 4.24333500  | -0.90268200 | 0.18934500  |
| C  | 5.67259400  | -1.41088800 | 0.29273500  |
| H  | 6.32967200  | -0.57744800 | 0.01627400  |
| H  | 5.86318100  | -1.58891100 | 1.35881300  |
| C  | 5.97824200  | -2.65938600 | -0.53561200 |
| H  | 7.02187700  | -2.96207100 | -0.39679200 |
| H  | 5.33461700  | -3.49375600 | -0.24356100 |
| H  | 5.81236000  | -2.47753000 | -1.60155100 |

H 1.17267000 2.34874500 -1.32787100  
 O 1.79164200 2.36274700 -0.58120200

F/N-i-TS1

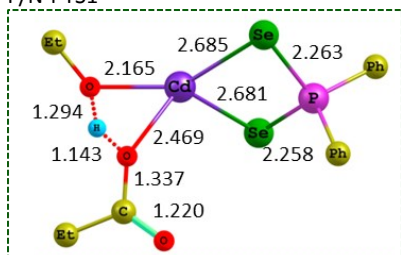

|    |             |             |             |
|----|-------------|-------------|-------------|
| Cd | -1.36702500 | -1.08248300 | -0.03078500 |
| C  | -4.10525600 | -2.64674300 | -0.71915900 |
| H  | -3.98636200 | -2.44310800 | -1.79575700 |
| H  | -3.62802600 | -3.61542200 | -0.51600200 |
| C  | -5.58747500 | -2.71994500 | -0.36500200 |
| H  | -5.71648500 | -2.93671500 | 0.70032500  |
| H  | -6.08889600 | -1.77121400 | -0.58578600 |
| H  | -6.08229900 | -3.50889300 | -0.94418700 |
| O  | -2.70891600 | 2.71094700  | 0.16628500  |
| C  | -3.46924800 | 1.75975100  | 0.09341500  |
| C  | -4.89847900 | 1.78239700  | 0.62361500  |
| H  | -5.56483400 | 1.59025000  | -0.22798600 |
| H  | -5.02072900 | 0.92098300  | 1.29369300  |
| C  | -5.27618900 | 3.08482600  | 1.32862400  |
| H  | -6.31226000 | 3.04161800  | 1.68045500  |
| H  | -4.62633200 | 3.26831400  | 2.18902300  |
| H  | -5.17408400 | 3.93942600  | 0.65417600  |
| O  | -3.10142900 | 0.61348200  | -0.48803600 |
| H  | -3.59378700 | -0.39189500 | -0.25575400 |
| P  | 1.67642800  | -0.02868200 | -0.00639800 |
| Se | 0.39233800  | -0.29374200 | 1.83157000  |
| Se | 0.72196300  | -1.16359100 | -1.71560300 |
| C  | 3.36803800  | -0.64135800 | 0.32954400  |
| C  | 3.93933600  | -1.66786200 | -0.43299600 |
| C  | 4.08813000  | -0.08274500 | 1.40027500  |
| C  | 5.22773300  | -2.12308400 | -0.13608400 |
| H  | 3.37903200  | -2.11352000 | -1.24879400 |
| C  | 5.37166600  | -0.54288500 | 1.69221700  |
| H  | 3.64942200  | 0.70539200  | 2.00539000  |
| C  | 5.94386600  | -1.56308800 | 0.92358800  |
| H  | 5.66586800  | -2.91766400 | -0.73280200 |
| H  | 5.92235800  | -0.10805400 | 2.52108700  |
| H  | 6.94305900  | -1.92095300 | 1.15453500  |
| C  | 1.83563300  | 1.74245000  | -0.43803700 |
| C  | 3.04826200  | 2.24679100  | -0.93675600 |
| C  | 0.71741300  | 2.58564400  | -0.33296800 |
| C  | 3.14085200  | 3.58764900  | -1.31675800 |
| H  | 3.91787100  | 1.60435000  | -1.02852600 |
| C  | 0.81875800  | 3.92212400  | -0.72100600 |
| H  | -0.23592100 | 2.22463200  | 0.04062500  |
| C  | 2.02799000  | 4.42632100  | -1.20925800 |
| H  | 4.08280600  | 3.97267700  | -1.69664300 |
| H  | -0.05555600 | 4.56005600  | -0.63696300 |
| H  | 2.10289800  | 5.46853000  | -1.50650900 |
| O  | -3.45707600 | -1.64087100 | 0.05520800  |

F/N-i-IM2

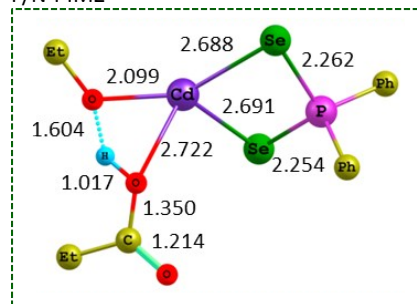

|    |             |             |             |
|----|-------------|-------------|-------------|
| Cd | -1.34817700 | -1.18272600 | -0.09593700 |
| C  | -4.03095700 | -2.62127300 | -0.82368100 |
| H  | -3.86497800 | -2.52493400 | -1.91029500 |
| H  | -3.59423900 | -3.58495500 | -0.51672800 |
| C  | -5.53073800 | -2.63822500 | -0.53868500 |
| H  | -5.71569100 | -2.75879500 | 0.53394300  |
| H  | -5.99815300 | -1.70218300 | -0.86453600 |
| H  | -6.01630700 | -3.46536400 | -1.07107400 |
| O  | -2.82808900 | 2.95140400  | 0.25945300  |
| C  | -3.48019700 | 1.92890100  | 0.19815100  |
| C  | -4.80703800 | 1.71065300  | 0.91139200  |
| H  | -5.56649100 | 1.52561000  | 0.13952000  |
| H  | -4.73455400 | 0.77552400  | 1.48189200  |
| C  | -5.21691500 | 2.87790700  | 1.80884000  |
| H  | -6.18101400 | 2.67046800  | 2.28405700  |
| H  | -4.47483300 | 3.04958800  | 2.59368500  |
| H  | -5.30526400 | 3.80318800  | 1.23312800  |
| O  | -3.05022800 | 0.89143400  | -0.55188900 |
| H  | -3.54824400 | 0.01445900  | -0.42225600 |
| P  | 1.66769800  | -0.03526300 | 0.00081800  |
| Se | 0.30759700  | -0.21054500 | 1.78938000  |
| Se | 0.83804900  | -1.33932400 | -1.65127000 |
| C  | 3.36620300  | -0.54102200 | 0.45503100  |
| C  | 3.90724000  | -1.75568600 | 0.01468500  |
| C  | 4.10927700  | 0.28368000  | 1.31773500  |
| C  | 5.18743400  | -2.13806100 | 0.42558000  |
| H  | 3.33035400  | -2.39780300 | -0.64346400 |
| C  | 5.38503900  | -0.10521600 | 1.72544600  |
| H  | 3.69649200  | 1.22488300  | 1.66866200  |
| C  | 5.92625200  | -1.31611700 | 1.27945900  |
| H  | 5.60339200  | -3.07882100 | 0.07725100  |
| H  | 5.95481300  | 0.53615400  | 2.39134200  |
| H  | 6.92014500  | -1.61638400 | 1.59852600  |
| C  | 1.78158000  | 1.69647100  | -0.57837500 |
| C  | 2.89762600  | 2.10186400  | -1.33107600 |
| C  | 0.72639100  | 2.59297700  | -0.35462300 |
| C  | 2.95843800  | 3.39896300  | -1.84125600 |
| H  | 3.71574800  | 1.41333800  | -1.51897000 |
| C  | 0.79170400  | 3.88683600  | -0.87680600 |
| H  | -0.14942100 | 2.29674000  | 0.21298900  |
| C  | 1.90598900  | 4.29271200  | -1.61508900 |
| H  | 3.82544200  | 3.70856700  | -2.41763500 |
| H  | -0.03698600 | 4.56609600  | -0.70307300 |
| H  | 1.95481500  | 5.30070400  | -2.01714600 |
| O  | -3.41342200 | -1.55445600 | -0.11921500 |



N

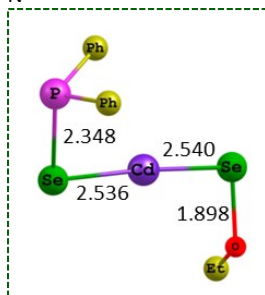

|    |             |             |             |
|----|-------------|-------------|-------------|
| Se | 0.85621800  | -0.87133400 | 2.12534300  |
| P  | 2.64134400  | 0.34062100  | 1.20008800  |
| C  | 1.75067700  | 1.71923600  | 0.32726800  |
| C  | 1.25349400  | 1.63474300  | -0.98737400 |
| C  | 1.55189500  | 2.91092700  | 1.04590700  |
| C  | 0.56023000  | 2.70820800  | -1.55730600 |
| H  | 1.43069800  | 0.74028100  | -1.57852900 |
| C  | 0.85532200  | 3.98100100  | 0.47748900  |
| H  | 1.93929700  | 2.99707900  | 2.05792000  |
| C  | 0.35479900  | 3.88161000  | -0.82416400 |
| H  | 0.18791100  | 2.62787500  | -2.57500500 |
| H  | 0.70819000  | 4.89265600  | 1.04968300  |
| H  | -0.18407800 | 4.71391800  | -1.26738000 |
| C  | 3.24375000  | -0.66445600 | -0.23924600 |
| C  | 4.26912100  | -0.08829800 | -1.01490700 |
| C  | 2.84439700  | -1.97714700 | -0.52511300 |
| C  | 4.85293800  | -0.79573900 | -2.06625000 |
| H  | 4.61283600  | 0.92116000  | -0.79989800 |
| C  | 3.43644400  | -2.68912000 | -1.57494400 |
| H  | 2.07277200  | -2.44746600 | 0.07643200  |
| C  | 4.43705500  | -2.10142700 | -2.35073400 |
| H  | 5.63604200  | -0.33032400 | -2.65839600 |
| H  | 3.11139800  | -3.70498600 | -1.78239800 |
| H  | 4.89517300  | -2.65532200 | -3.16512000 |
| Cd | -0.94777700 | -0.30036000 | 0.43681700  |
| Se | -2.88418400 | 0.16527600  | -1.13926400 |
| C  | -4.92794000 | -1.20032700 | 0.24689700  |
| H  | -4.60524100 | -0.63701500 | 1.13579400  |
| H  | -5.18845300 | -2.21737500 | 0.56895600  |
| C  | -6.12884300 | -0.52889000 | -0.40862900 |
| H  | -6.45468600 | -1.09771100 | -1.28530300 |
| H  | -6.96402300 | -0.47295700 | 0.29979100  |
| H  | -5.88607100 | 0.49106200  | -0.72464800 |
| O  | -3.82598000 | -1.40610800 | -0.64256000 |

N-i

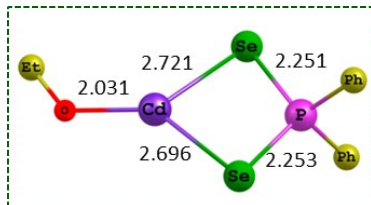

|    |             |             |             |
|----|-------------|-------------|-------------|
| Cd | 2.26703000  | -0.05180200 | 0.18705200  |
| C  | 5.16327200  | 0.00671100  | -0.73027700 |
| H  | 5.03241900  | -0.89220900 | -1.35908500 |
| H  | 4.98328800  | 0.87893500  | -1.38408100 |
| C  | 6.60520700  | 0.05336400  | -0.22714100 |
| H  | 6.76997500  | 0.95399800  | 0.37377200  |
| H  | 6.81722400  | -0.81824200 | 0.40113800  |
| H  | 7.31091000  | 0.05910700  | -1.06797100 |
| P  | -1.03429600 | -0.01127500 | -0.00019200 |
| Se | 0.36724400  | -0.01133000 | -1.76119400 |
| Se | 0.18082000  | -0.15028300 | 1.89243500  |
| C  | -2.22071600 | -1.40224000 | -0.12216200 |

|   |             |             |             |
|---|-------------|-------------|-------------|
| C | -2.06480800 | -2.55897500 | 0.65278100  |
| C | -3.27034500 | -1.32243900 | -1.05348400 |
| C | -2.95454600 | -3.62594200 | 0.50005800  |
| H | -1.25603100 | -2.62152900 | 1.37395800  |
| C | -4.15534900 | -2.39049600 | -1.20013400 |
| H | -3.40053400 | -0.43119100 | -1.66013100 |
| C | -3.99840000 | -3.54421700 | -0.42433700 |
| H | -2.83047800 | -4.51785900 | 1.10710700  |
| H | -4.96534700 | -2.32194900 | -1.92031500 |
| H | -4.68897300 | -4.37452400 | -0.54032800 |
| C | -2.07058200 | 1.50039300  | 0.02167100  |
| C | -3.10429400 | 1.59587800  | 0.96956900  |
| C | -1.82720400 | 2.56707100  | -0.85228600 |
| C | -3.88983600 | 2.74614700  | 1.03077300  |
| H | -3.29660000 | 0.77739900  | 1.65727400  |
| C | -2.61775700 | 3.71848600  | -0.78471800 |
| H | -1.02544100 | 2.49582300  | -1.58052400 |
| C | -3.64761500 | 3.80963300  | 0.15359100  |
| H | -4.68759900 | 2.81367600  | 1.76456100  |
| H | -2.42571100 | 4.54093200  | -1.46747600 |
| H | -4.25988200 | 4.70533500  | 0.20473100  |
| O | 4.28792900  | -0.00218400 | 0.38202200  |

N-ii

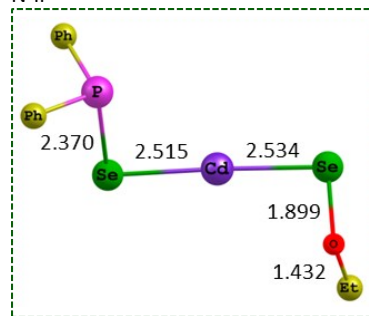

|    |             |             |             |
|----|-------------|-------------|-------------|
| Se | 0.52053100  | -0.40565600 | 1.31186500  |
| P  | 1.79362100  | -0.07772400 | -0.65989300 |
| C  | 3.06812700  | -1.39592600 | -0.42095100 |
| C  | 4.15170800  | -1.29084500 | 0.46755300  |
| C  | 2.92453800  | -2.56910300 | -1.18098400 |
| C  | 5.06816700  | -2.33664600 | 0.59152900  |
| H  | 4.28201000  | -0.38953400 | 1.05894400  |
| C  | 3.84064400  | -3.61683400 | -1.05442800 |
| H  | 2.09339100  | -2.66093100 | -1.87574200 |
| C  | 4.91423100  | -3.50207500 | -0.16734300 |
| H  | 5.90191300  | -2.24280900 | 1.28194500  |
| H  | 3.71749300  | -4.51713900 | -1.64986100 |
| H  | 5.62953400  | -4.31383800 | -0.06934700 |
| C  | 2.78192400  | 1.45339400  | -0.30202700 |
| C  | 3.72107300  | 1.82005100  | -1.28581000 |
| C  | 2.59956200  | 2.30055900  | 0.79927100  |
| C  | 4.47121200  | 2.98939100  | -1.15715200 |
| H  | 3.87150500  | 1.18614900  | -2.15685400 |
| C  | 3.34691300  | 3.47772200  | 0.92346900  |
| H  | 1.87649900  | 2.03938300  | 1.56550700  |
| C  | 4.28513700  | 3.82494700  | -0.05004400 |
| H  | 5.19577300  | 3.25048100  | -1.92354100 |
| H  | 3.19384600  | 4.11975200  | 1.78678500  |
| H  | 4.86451400  | 4.73854400  | 0.04841200  |
| Cd | -1.66112700 | 0.14177300  | 0.18661200  |
| Se | -3.90188100 | 0.62138600  | -0.89621600 |
| C  | -5.54009100 | -1.05945000 | 0.67077800  |
| H  | -5.10046700 | -0.56103400 | 1.54812700  |
| H  | -5.66275400 | -2.12328500 | 0.91363500  |
| C  | -6.88579500 | -0.43774000 | 0.31765300  |
| H  | -7.32520800 | -0.94068900 | -0.54961200 |

|   |             |             |             |
|---|-------------|-------------|-------------|
| H | -7.57859600 | -0.53231800 | 1.16236900  |
| H | -6.78011700 | 0.62756400  | 0.08724700  |
| O | -4.60846700 | -1.07488000 | -0.41602000 |

N-i/M-IM1

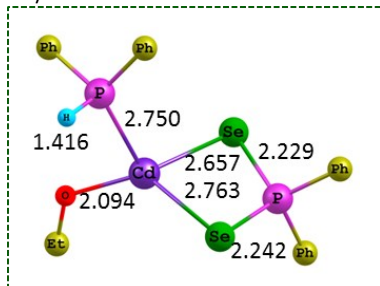

|    |             |             |             |
|----|-------------|-------------|-------------|
| Cd | -0.65830100 | -1.20465000 | 0.37490600  |
| C  | -1.18619600 | -4.22120500 | 0.76885800  |
| H  | -0.57689000 | -4.50030800 | -0.11200500 |
| H  | -0.50219600 | -4.24186500 | 1.63792300  |
| C  | -2.26447100 | -5.28776100 | 0.97335600  |
| H  | -2.86633600 | -5.05580200 | 1.85921100  |
| H  | -2.93457000 | -5.32558800 | 0.10678800  |
| H  | -1.81575900 | -6.28094500 | 1.10742100  |
| P  | 2.30000000  | 0.08137300  | -0.06705900 |
| Se | 1.37867300  | -0.21181000 | 1.95608900  |
| Se | 0.78806900  | -0.29533500 | -1.66047900 |
| C  | 3.75259100  | -1.02456200 | -0.27051000 |
| C  | 3.79253700  | -2.01524000 | -1.25879800 |
| C  | 4.83437400  | -0.88017500 | 0.61529100  |
| C  | 4.90889600  | -2.85161300 | -1.36524100 |
| H  | 2.95430600  | -2.13263300 | -1.93854200 |
| C  | 5.94582000  | -1.71412900 | 0.50230400  |
| H  | 4.80745600  | -0.12345400 | 1.39407100  |
| C  | 5.98481400  | -2.70244200 | -0.48850000 |
| H  | 4.93185900  | -3.61862400 | -2.13392300 |
| H  | 6.77806700  | -1.59696700 | 1.19029500  |
| H  | 6.84992100  | -3.35407800 | -0.57181200 |
| C  | 2.98467400  | 1.77674600  | -0.24175100 |
| C  | 3.90565800  | 2.04622300  | -1.26794000 |
| C  | 2.55876000  | 2.81385800  | 0.59829100  |
| C  | 4.39592800  | 3.34048100  | -1.44508200 |
| H  | 4.24298500  | 1.24996100  | -1.92476000 |
| C  | 3.05373200  | 4.10830500  | 0.41655800  |
| H  | 1.84864100  | 2.60556100  | 1.39270300  |
| C  | 3.97080500  | 4.37392200  | -0.60323700 |
| H  | 5.10990600  | 3.54076100  | -2.23873800 |
| H  | 2.72309800  | 4.90570000  | 1.07588100  |
| H  | 4.35567900  | 5.38034000  | -0.74141400 |
| P  | -2.87760500 | 0.38091900  | 0.72345300  |
| H  | -3.40124900 | 0.28495600  | 2.03512800  |
| C  | -4.32104800 | -0.15599000 | -0.29035800 |
| C  | -4.44280000 | -1.53149500 | -0.55559400 |
| C  | -5.27427200 | 0.74147600  | -0.79560100 |
| C  | -5.52809500 | -1.99586900 | -1.30486200 |
| H  | -3.69190000 | -2.23095100 | -0.18360600 |
| C  | -6.34849800 | 0.26707800  | -1.55305600 |
| H  | -5.18030000 | 1.80630000  | -0.60567500 |
| C  | -6.47903500 | -1.10197500 | -1.80531000 |
| H  | -5.62111400 | -3.05972300 | -1.50446300 |
| H  | -7.08134400 | 0.96731400  | -1.94443900 |
| H  | -7.31530000 | -1.46852900 | -2.39428700 |
| C  | -2.76745400 | 2.20364000  | 0.57334000  |
| C  | -1.94855800 | 2.75655700  | -0.42609500 |
| C  | -3.45604400 | 3.06283400  | 1.44653500  |
| C  | -1.83722700 | 4.14254700  | -0.55972200 |
| H  | -1.38537300 | 2.10677900  | -1.09070000 |

|   |             |             |             |
|---|-------------|-------------|-------------|
| C | -3.33538200 | 4.44891400  | 1.31622900  |
| H | -4.08777000 | 2.65075300  | 2.22885600  |
| C | -2.52961400 | 4.99028100  | 0.31007400  |
| H | -1.19998800 | 4.55714200  | -1.33544200 |
| H | -3.87105500 | 5.10302900  | 1.99837500  |
| H | -2.43724200 | 6.06791600  | 0.20856700  |
| O | -1.78245100 | -2.95596500 | 0.60717000  |

N-i/M-TS1

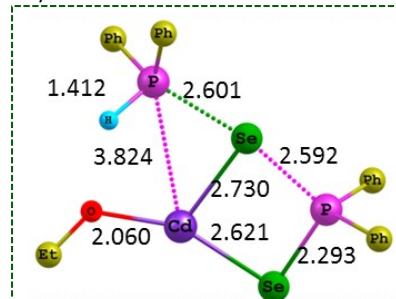

|    |             |             |             |
|----|-------------|-------------|-------------|
| P  | -2.35762600 | 0.27346600  | 0.16371000  |
| Se | -2.65631800 | -1.83461400 | -0.68823600 |
| P  | 2.77658800  | 0.62328300  | -0.34071300 |
| Se | 0.20100900  | 0.66099000  | 0.01990800  |
| H  | 3.13144900  | -0.07997900 | -1.51199100 |
| Cd | -0.04752000 | -1.88581900 | -0.93209700 |
| C  | 1.87026700  | -3.96249400 | -2.14263200 |
| H  | 1.57188000  | -3.80441200 | -3.19472500 |
| H  | 2.93918200  | -4.23542800 | -2.16309300 |
| C  | 1.07489900  | -5.13830400 | -1.57048500 |
| H  | 1.37299000  | -5.33866200 | -0.53522700 |
| H  | -0.00248000 | -4.92270800 | -1.57815400 |
| H  | 1.23557700  | -6.05003200 | -2.16029800 |
| C  | -3.43423900 | 1.43232500  | -0.77453900 |
| C  | -3.84308300 | 1.16244200  | -2.08922500 |
| C  | -3.75911300 | 2.67502600  | -0.19974200 |
| C  | -4.57164300 | 2.11200700  | -2.81091300 |
| H  | -3.60197700 | 0.20550900  | -2.54145100 |
| C  | -4.48725000 | 3.61992400  | -0.92430700 |
| H  | -3.45109300 | 2.90473100  | 0.81624900  |
| C  | -4.89620700 | 3.34161000  | -2.23257500 |
| H  | -4.88844400 | 1.88536600  | -3.82511600 |
| H  | -4.73608300 | 4.57251800  | -0.46490100 |
| H  | -5.46414900 | 4.07736400  | -2.79482100 |
| C  | -3.05871200 | 0.28716000  | 1.86373700  |
| C  | -2.18477000 | 0.38531900  | 2.95667600  |
| C  | -4.44012700 | 0.16536600  | 2.09416200  |
| C  | -2.68582100 | 0.36704300  | 4.26241700  |
| H  | -1.11599400 | 0.47394800  | 2.78381800  |
| C  | -4.93605600 | 0.14918300  | 3.39774000  |
| H  | -5.12588100 | 0.08314600  | 1.25608600  |
| C  | -4.05948600 | 0.24992500  | 4.48470800  |
| H  | -2.00106800 | 0.44504500  | 5.10217200  |
| H  | -6.00513100 | 0.05407500  | 3.56611800  |
| H  | -4.44805700 | 0.23532400  | 5.49914000  |
| C  | 3.80952300  | -0.23858000 | 0.90362700  |
| C  | 4.47130700  | 0.46362200  | 1.92294800  |
| C  | 3.85286300  | -1.64444800 | 0.88133400  |
| C  | 5.18633600  | -0.23156300 | 2.90180000  |
| H  | 4.44115300  | 1.54914600  | 1.94973200  |
| C  | 4.57217600  | -2.32896500 | 1.86401600  |
| H  | 3.31822200  | -2.19411900 | 0.10623300  |
| C  | 5.23982400  | -1.62804700 | 2.87376100  |
| H  | 5.70178700  | 0.31940900  | 3.68360000  |
| H  | 4.60889200  | -3.41461000 | 1.83927200  |
| H  | 5.79760500  | -2.16670500 | 3.63470900  |

|   |            |             |             |
|---|------------|-------------|-------------|
| C | 3.54973200 | 2.26432700  | -0.61492900 |
| C | 2.83953900 | 3.42348400  | -0.26960000 |
| C | 4.83328500 | 2.38510400  | -1.17620000 |
| C | 3.40773300 | 4.68552000  | -0.47196200 |
| H | 1.83867300 | 3.33836700  | 0.14396200  |
| C | 5.39497000 | 3.64588500  | -1.38310200 |
| H | 5.39461300 | 1.49528500  | -1.44786600 |
| C | 4.68355600 | 4.79794400  | -1.02857200 |
| H | 2.84934200 | 5.57695400  | -0.20102400 |
| H | 6.38591900 | 3.72946300  | -1.82033900 |
| H | 5.12248600 | 5.77835700  | -1.19064600 |
| O | 1.75383100 | -2.77387000 | -1.39268200 |

|   |            |             |             |
|---|------------|-------------|-------------|
| C | 5.46326300 | -2.99383100 | 2.19954100  |
| H | 6.04624500 | -1.51334700 | 3.66012200  |
| H | 4.72007600 | -4.24238800 | 0.60372800  |
| H | 5.99749300 | -3.80225700 | 2.69051300  |
| C | 4.12243300 | 1.93162600  | 0.16474800  |
| C | 3.55191800 | 3.14141100  | 0.58004200  |
| C | 5.46241900 | 1.90039700  | -0.26035200 |
| C | 4.31743700 | 4.31139500  | 0.57601100  |
| H | 2.51431600 | 3.16638600  | 0.89908200  |
| C | 6.21904000 | 3.07248500  | -0.26788500 |
| H | 5.91640100 | 0.96696800  | -0.58177900 |
| C | 5.64767200 | 4.27891800  | 0.15221800  |
| H | 3.86993400 | 5.24579500  | 0.90144100  |
| H | 7.25270700 | 3.04336000  | -0.59976200 |
| H | 6.23932200 | 5.18979900  | 0.14694900  |
| O | 1.86107100 | -1.52422300 | -2.03333600 |

N-i/M-IM2

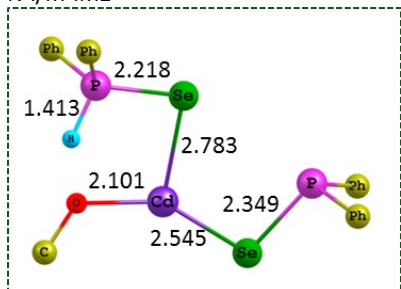

|    |             |             |             |
|----|-------------|-------------|-------------|
| P  | -2.88310500 | 0.30591300  | 0.57834700  |
| Se | -2.50236100 | -1.16777500 | -1.21119200 |
| P  | 3.13743300  | 0.39365400  | 0.10861900  |
| Se | 1.06526500  | 0.65588300  | 0.85371100  |
| H  | 3.06762100  | -0.05238600 | -1.22981100 |
| Cd | 0.03419300  | -0.96517500 | -1.16011200 |
| C  | 1.94619700  | -2.16008900 | -3.29149200 |
| H  | 1.55198200  | -1.51395000 | -4.09561000 |
| H  | 3.01524200  | -2.31655600 | -3.51882400 |
| C  | 1.23095200  | -3.51231700 | -3.34228800 |
| H  | 1.62545800  | -4.18724400 | -2.57432200 |
| H  | 0.15364700  | -3.39371600 | -3.16799900 |
| H  | 1.36040900  | -3.98980800 | -4.32209100 |
| C  | -3.79645200 | 1.73065700  | -0.19114000 |
| C  | -3.85745600 | 1.99008100  | -1.56723800 |
| C  | -4.36092100 | 2.66981400  | 0.69422800  |
| C  | -4.47816900 | 3.14900900  | -2.04828900 |
| H  | -3.42735800 | 1.27834200  | -2.26512600 |
| C  | -4.98613400 | 3.82108600  | 0.21420000  |
| H  | -4.31796500 | 2.49785500  | 1.76730700  |
| C  | -5.04639600 | 4.06627100  | -1.16250900 |
| H  | -4.51954000 | 3.32827300  | -3.11952900 |
| H  | -5.42332200 | 4.52771800  | 0.91464600  |
| H  | -5.52988300 | 4.96407800  | -1.53751300 |
| C  | -4.26986800 | -0.57401900 | 1.43603000  |
| C  | -3.96202000 | -1.23969300 | 2.63415500  |
| C  | -5.58953300 | -0.62282800 | 0.95563900  |
| C  | -4.94739300 | -1.93971400 | 3.33672100  |
| H  | -2.94539600 | -1.20739700 | 3.01839700  |
| C  | -6.57445600 | -1.31996400 | 1.65759500  |
| H  | -5.84766100 | -0.11297900 | 0.03222500  |
| C  | -6.25622700 | -1.98088100 | 2.84938900  |
| H  | -4.69296500 | -2.44763400 | 4.26303700  |
| H  | -7.59059700 | -1.34981000 | 1.27334700  |
| H  | -7.02481700 | -2.52207400 | 3.39434000  |
| C  | 4.09448600  | -0.91270800 | 0.93597500  |
| C  | 4.80730500  | -0.66430400 | 2.11906100  |
| C  | 4.05634000  | -2.20640800 | 0.38980100  |
| C  | 5.49229900  | -1.70610900 | 2.74605100  |
| H  | 4.83304200  | 0.33374200  | 2.54694100  |
| C  | 4.74588100  | -3.24190200 | 1.02569300  |
| H  | 3.47642400  | -2.38802800 | -0.51323300 |

G/M-IM1

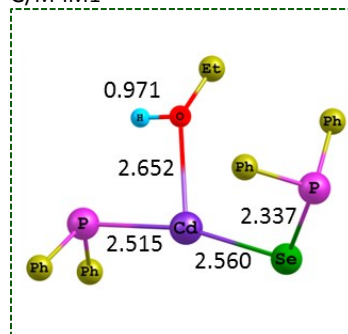

|    |             |             |             |
|----|-------------|-------------|-------------|
| Se | 1.25111800  | -0.17499100 | 2.31605300  |
| P  | 3.21409600  | 0.76842600  | 1.46721500  |
| C  | 2.63010600  | 2.05032400  | 0.26177800  |
| C  | 2.10027200  | 1.77596100  | -1.01237100 |
| C  | 2.71561700  | 3.38820200  | 0.68097400  |
| C  | 1.66469400  | 2.81452500  | -1.83878000 |
| H  | 2.02827100  | 0.75189400  | -1.36730900 |
| C  | 2.27633800  | 4.42834100  | -0.14498100 |
| H  | 3.12598000  | 3.61554600  | 1.66149800  |
| C  | 1.75043400  | 4.14380600  | -1.40715900 |
| H  | 1.26035800  | 2.58591000  | -2.82141500 |
| H  | 2.34928900  | 5.45689600  | 0.19733200  |
| H  | 1.41254900  | 4.94938000  | -2.05313400 |
| C  | 3.95463000  | -0.52239100 | 0.35920800  |
| C  | 4.81451600  | -0.13563700 | -0.68671500 |
| C  | 3.86188400  | -1.88948700 | 0.67270500  |
| C  | 5.53987100  | -1.08781300 | -1.40762300 |
| H  | 4.91967800  | 0.91410800  | -0.94527800 |
| C  | 4.59457800  | -2.84042500 | -0.04347000 |
| H  | 3.20603500  | -2.20955000 | 1.47706400  |
| C  | 5.43507500  | -2.44515800 | -1.08837900 |
| H  | 6.19081600  | -0.76599500 | -2.21617600 |
| H  | 4.50718200  | -3.89177000 | 0.21807600  |
| H  | 6.00518800  | -3.18433100 | -1.64412500 |
| Cd | -0.43075500 | -0.26582200 | 0.38776000  |
| P  | -2.47766800 | -0.22874500 | -1.07361300 |
| H  | -0.27021300 | -1.23951200 | -2.36012200 |
| C  | -3.27944700 | 1.39584000  | -0.69320700 |
| C  | -4.66772200 | 1.51603600  | -0.50147400 |
| C  | -2.51273100 | 2.57626700  | -0.73048200 |
| C  | -5.26318000 | 2.77048400  | -0.33951000 |
| H  | -5.29051100 | 0.62718100  | -0.47649600 |
| C  | -3.10845400 | 3.82836000  | -0.57194400 |
| H  | -1.43641000 | 2.52206900  | -0.87968000 |
| C  | -4.48893500 | 3.93300700  | -0.37254600 |
| H  | -6.33742100 | 2.83539200  | -0.18744700 |

|   |             |             |             |
|---|-------------|-------------|-------------|
| H | -2.49042800 | 4.72189100  | -0.59507000 |
| H | -4.95284100 | 4.90646100  | -0.24250400 |
| C | -3.55090600 | -1.47454700 | -0.20986500 |
| C | -3.94925200 | -1.37533300 | 1.13753800  |
| C | -3.96600000 | -2.60027100 | -0.94232600 |
| C | -4.73322100 | -2.36691000 | 1.72869400  |
| H | -3.64735600 | -0.51305300 | 1.72602500  |
| C | -4.74372400 | -3.60120900 | -0.34870400 |
| H | -3.68367200 | -2.68901000 | -1.98825900 |
| C | -5.13000500 | -3.48692300 | 0.98793400  |
| H | -5.02851200 | -2.26995800 | 2.76997400  |
| H | -5.05185100 | -4.46300400 | -0.93454100 |
| H | -5.73578700 | -4.26079900 | 1.45079900  |
| C | 1.43225800  | -2.28819900 | -2.40325200 |
| H | 1.64832400  | -2.04224300 | -3.45150900 |
| H | 2.36173600  | -2.19689800 | -1.83791600 |
| C | 0.85673700  | -3.69344300 | -2.28161200 |
| H | -0.07803900 | -3.79336800 | -2.84583700 |
| H | 1.56755700  | -4.42703100 | -2.67903100 |
| H | 0.65576100  | -3.94165800 | -1.23468700 |
| O | 0.55694600  | -1.28313100 | -1.85364000 |

|   |             |             |             |
|---|-------------|-------------|-------------|
| C | 3.36205300  | 3.74905300  | 1.51357600  |
| H | 1.97866500  | 2.18813800  | 2.04781100  |
| C | 4.44600600  | 4.11735300  | 0.71082500  |
| H | 5.81562700  | 3.47569200  | -0.82935900 |
| H | 2.94882100  | 4.45451100  | 2.22918600  |
| H | 4.87679600  | 5.11073900  | 0.79639500  |
| C | 3.83391200  | -1.32073300 | -0.09227600 |
| C | 3.68715200  | -2.14753600 | -1.21822300 |
| C | 4.96857800  | -1.48497200 | 0.72501300  |
| C | 4.64469800  | -3.12234800 | -1.51706100 |
| H | 2.82671100  | -2.02353300 | -1.86981700 |
| C | 5.92984800  | -2.44857600 | 0.41781000  |
| H | 5.09750000  | -0.85761700 | 1.60245700  |
| C | 5.76841200  | -3.27292300 | -0.70190000 |
| H | 4.51446100  | -3.75423200 | -2.39101900 |
| H | 6.80102200  | -2.56204200 | 1.05702400  |
| H | 6.51567900  | -4.02563300 | -0.93621800 |
| C | -0.44862400 | -1.35920500 | 2.76454300  |
| H | -0.15938600 | -0.90766500 | 3.72711100  |
| H | -1.52566800 | -1.17446400 | 2.63672000  |
| C | -0.18931400 | -2.86554400 | 2.80331100  |
| H | 0.87531800  | -3.07331000 | 2.95806600  |
| H | -0.75365800 | -3.33764600 | 3.61718600  |
| H | -0.49544700 | -3.33274700 | 1.86033900  |
| O | 0.26500300  | -0.71126300 | 1.72580500  |

G/M-TS1

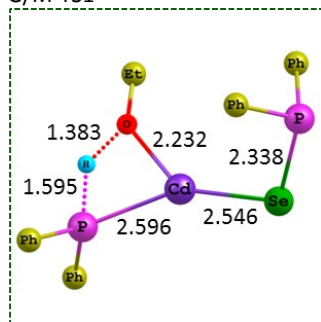

|    |             |             |             |
|----|-------------|-------------|-------------|
| Se | -1.64613300 | -0.61557500 | -2.32515900 |
| P  | -3.58485900 | 0.30736600  | -1.40118300 |
| C  | -2.97023300 | 1.83406900  | -0.54750600 |
| C  | -2.35368500 | 1.84917500  | 0.71593000  |
| C  | -3.12203100 | 3.04878500  | -1.23686500 |
| C  | -1.89432500 | 3.04656000  | 1.26892400  |
| H  | -2.23702600 | 0.92654800  | 1.27693400  |
| C  | -2.65827400 | 4.24725800  | -0.68606200 |
| H  | -3.60224000 | 3.05376500  | -2.21209600 |
| C  | -2.04286900 | 4.24867800  | 0.56831300  |
| H  | -1.42120900 | 3.03890400  | 2.24714900  |
| H  | -2.78133800 | 5.17682900  | -1.23483100 |
| H  | -1.68407600 | 5.17907600  | 0.99948100  |
| C  | -4.04622400 | -0.77487000 | 0.03291300  |
| C  | -4.93701600 | -0.26079900 | 0.99589900  |
| C  | -3.70382400 | -2.13437000 | 0.10083000  |
| C  | -5.44791500 | -1.07681000 | 2.00668900  |
| H  | -5.23109700 | 0.78494000  | 0.96186300  |
| C  | -4.22035600 | -2.95228700 | 1.11118100  |
| H  | -3.02982100 | -2.55473500 | -0.63949100 |
| C  | -5.09111900 | -2.42802900 | 2.06905100  |
| H  | -6.12646600 | -0.65652900 | 2.74416400  |
| H  | -3.93879900 | -4.00133700 | 1.14681700  |
| H  | -5.49076700 | -3.06413800 | 2.85374100  |
| Cd | 0.10308600  | -0.43765500 | -0.48369000 |
| P  | 2.54095000  | -0.09994600 | 0.34338100  |
| H  | 1.62423000  | -0.49640000 | 1.58738800  |
| C  | 3.33384100  | 1.54090300  | 0.49116100  |
| C  | 4.41955700  | 1.92120900  | -0.31657800 |
| C  | 2.81227600  | 2.46953000  | 1.40979100  |
| C  | 4.97385400  | 3.19799200  | -0.20097000 |
| H  | 4.83492300  | 1.21930000  | -1.03378400 |

G/M-IM2

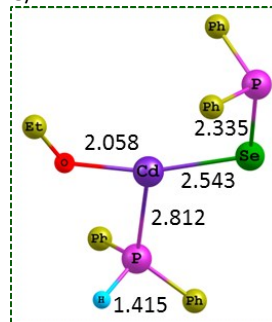

|    |             |             |             |
|----|-------------|-------------|-------------|
| Se | 0.81833700  | -1.69646700 | -1.03556400 |
| P  | 3.13072000  | -1.41865500 | -1.20943000 |
| C  | 3.68994100  | -1.33342400 | 0.55537100  |
| C  | 3.62323600  | -0.18544800 | 1.36337300  |
| C  | 4.19977000  | -2.51862500 | 1.11179400  |
| C  | 4.04765100  | -0.22510500 | 2.69313800  |
| H  | 3.25057200  | 0.74819400  | 0.95189900  |
| C  | 4.62047500  | -2.56124800 | 2.44430100  |
| H  | 4.26370600  | -3.41330100 | 0.49751300  |
| C  | 4.54494100  | -1.41406200 | 3.23833800  |
| H  | 3.98956700  | 0.67236400  | 3.30302800  |
| H  | 5.01035800  | -3.48716300 | 2.85808700  |
| H  | 4.87440300  | -1.44304300 | 4.27319300  |
| C  | 3.40260200  | 0.32651700  | -1.77825600 |
| C  | 4.69205600  | 0.87526700  | -1.63022000 |
| C  | 2.44641000  | 1.06040300  | -2.49694700 |
| C  | 5.00288000  | 2.12760900  | -2.16202000 |
| H  | 5.45843200  | 0.32587800  | -1.08971800 |
| C  | 2.76000700  | 2.31405300  | -3.03340900 |
| H  | 1.45215900  | 0.64845200  | -2.64057200 |
| C  | 4.03629500  | 2.85456200  | -2.86541000 |
| H  | 6.00124400  | 2.53493900  | -2.02694100 |
| H  | 2.00152800  | 2.86628100  | -3.58186000 |
| H  | 4.27848300  | 3.82899500  | -3.27994100 |
| Cd | -0.02994200 | 0.16001000  | 0.48203900  |
| P  | -2.80971600 | -0.13371600 | 0.79132700  |
| H  | -3.17524300 | -0.18557600 | 2.15774600  |



|   |             |             |             |
|---|-------------|-------------|-------------|
| C | -3.71035100 | -1.60450200 | 0.17491500  |
| C | -3.32877500 | -2.17588700 | -1.05081900 |
| C | -4.75353700 | -2.19501000 | 0.90886700  |
| C | -3.99001700 | -3.30456800 | -1.54068000 |
| H | -2.50721200 | -1.74881700 | -1.62005900 |
| C | -5.40647700 | -3.32999000 | 0.42170800  |
| H | -5.05739300 | -1.76901800 | 1.86120000  |
| C | -5.02813600 | -3.88357600 | -0.80513400 |
| H | -3.68377300 | -3.73750700 | -2.48836000 |
| H | -6.20867000 | -3.77976900 | 0.99980500  |
| H | -5.53533000 | -4.76685000 | -1.18246900 |
| C | -3.75246400 | 1.34767200  | 0.22462700  |
| C | -3.16536500 | 2.60527600  | 0.44943300  |
| C | -4.99476100 | 1.26378900  | -0.42170200 |
| C | -3.83446000 | 3.76457800  | 0.04812500  |
| H | -2.18958300 | 2.67024300  | 0.93064600  |
| C | -5.65006600 | 2.42902800  | -0.83070200 |
| H | -5.45214100 | 0.29723400  | -0.60927600 |
| C | -5.07414800 | 3.68015000  | -0.59296800 |
| H | -3.37934700 | 4.73427300  | 0.22949900  |
| H | -6.61053700 | 2.35647000  | -1.33335800 |
| H | -5.58657400 | 4.58384900  | -0.91088400 |
| C | 0.94674800  | 2.62840000  | 2.05999500  |
| H | 1.55813700  | 2.05365000  | 2.77851200  |
| H | 1.61545300  | 2.90360300  | 1.22465000  |
| C | 0.46069800  | 3.90706600  | 2.74314800  |
| H | -0.18964800 | 3.66344500  | 3.59035500  |
| H | 1.30775100  | 4.49879200  | 3.11341900  |
| H | -0.10995300 | 4.52501600  | 2.04089500  |
| O | -0.16107700 | 1.87334600  | 1.61533100  |

N-i/N-TS1

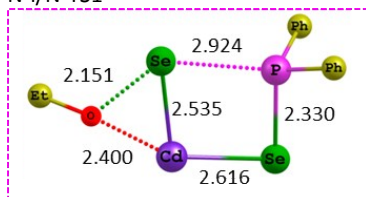

|    |             |             |             |
|----|-------------|-------------|-------------|
| Cd | 2.00435800  | -0.41782300 | 1.16972400  |
| C  | 4.68146900  | 0.63248400  | -0.90688700 |
| H  | 4.35209800  | 1.66115400  | -0.68469200 |
| H  | 5.55287900  | 0.41685300  | -0.26983900 |
| C  | 5.07038500  | 0.51188900  | -2.37687300 |
| H  | 5.43778100  | -0.49543600 | -2.59713700 |
| H  | 4.20737900  | 0.71265500  | -3.02144000 |
| H  | 5.85616700  | 1.23544600  | -2.62618400 |
| P  | -0.98165800 | 0.01785400  | -0.12193600 |
| Se | -0.43636700 | -0.36549600 | 2.11067800  |
| Se | 1.69115400  | 0.01637500  | -1.30798900 |
| C  | -1.93922200 | 1.59040900  | -0.10661000 |
| C  | -1.34046200 | 2.72654200  | -0.67285900 |
| C  | -3.22053700 | 1.69903400  | 0.46180700  |
| C  | -2.01289800 | 3.95286900  | -0.67348000 |
| H  | -0.34891900 | 2.64947000  | -1.11116900 |
| C  | -3.88892500 | 2.92341400  | 0.45823400  |
| H  | -3.69465500 | 0.82750900  | 0.90309100  |
| C  | -3.28624500 | 4.05283200  | -0.10865100 |
| H  | -1.54163700 | 4.82517300  | -1.11736300 |
| H  | -4.87851100 | 2.99781900  | 0.90045900  |
| H  | -3.80941100 | 5.00492500  | -0.10921500 |
| C  | -2.23357100 | -1.25972200 | -0.57244300 |
| C  | -3.06651100 | -1.01068000 | -1.67950900 |
| C  | -2.28295100 | -2.51950800 | 0.04345400  |
| C  | -3.93736200 | -1.99653500 | -2.14647400 |
| H  | -3.04012300 | -0.04595700 | -2.17815400 |

|   |             |             |             |
|---|-------------|-------------|-------------|
| C | -3.15533900 | -3.50401400 | -0.42868900 |
| H | -1.64810900 | -2.72633000 | 0.89897400  |
| C | -3.98521400 | -3.24716800 | -1.52279000 |
| H | -4.57709100 | -1.78579800 | -2.99891300 |
| H | -3.18660600 | -4.47161100 | 0.06442400  |
| H | -4.66276000 | -4.01375800 | -1.88762000 |
| O | 3.67734500  | -0.30567200 | -0.54796800 |

E-i/N-IM1

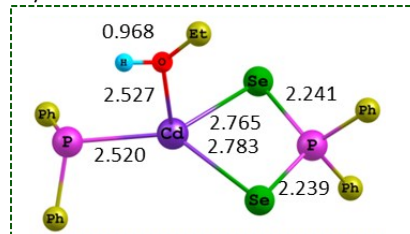

|    |             |             |             |
|----|-------------|-------------|-------------|
| Cd | 0.89181900  | -0.63166000 | 0.01499300  |
| Se | -1.14748000 | 0.04784200  | 1.78242700  |
| Se | -1.03198000 | -0.05251700 | -1.88451800 |
| P  | -2.30879900 | 0.39864000  | -0.09946400 |
| C  | -3.83389400 | -0.62800100 | -0.13727900 |
| C  | -4.15843900 | -1.50002400 | 0.90885600  |
| C  | -4.68419800 | -0.53308500 | -1.25219600 |
| C  | -5.32665400 | -2.26727200 | 0.84387300  |
| H  | -3.49963900 | -1.57642700 | 1.76856700  |
| C  | -5.84770600 | -1.29926800 | -1.31181600 |
| H  | -4.43693200 | 0.13338600  | -2.07356600 |
| C  | -6.17117900 | -2.16888100 | -0.26347300 |
| H  | -5.57317200 | -2.93873100 | 1.66148000  |
| H  | -6.49937700 | -1.22074000 | -2.17719800 |
| H  | -7.07745000 | -2.76577900 | -0.31268100 |
| C  | -2.93246700 | 2.12581000  | -0.15405000 |
| C  | -2.40446400 | 3.06449100  | -1.04890400 |
| C  | -3.93227700 | 2.51505000  | 0.75330300  |
| C  | -2.87603300 | 4.38083100  | -1.04013300 |
| H  | -1.63182200 | 2.76466300  | -1.74999000 |
| C  | -4.39958700 | 3.82900300  | 0.75710000  |
| H  | -4.34499300 | 1.79650500  | 1.45544900  |
| C  | -3.87168700 | 4.76486400  | -0.13959800 |
| H  | -2.46346600 | 5.10237800  | -1.73939000 |
| H  | -5.17332100 | 4.12262400  | 1.46058100  |
| H  | -4.23662700 | 5.78799700  | -0.13436300 |
| H  | 1.54527800  | -3.54260500 | 0.19333900  |
| C  | -0.36421400 | -4.12119100 | 0.02274900  |
| H  | -0.17190200 | -4.92037600 | -0.70523600 |
| H  | -1.25809700 | -3.58237400 | -0.30038200 |
| C  | -0.54213200 | -4.68740300 | 1.42582200  |
| H  | -1.37618900 | -5.39858400 | 1.44189100  |
| H  | 0.35650100  | -5.22182900 | 1.75701800  |
| H  | -0.75385900 | -3.88814900 | 2.14249500  |
| P  | 3.38050100  | -0.95190200 | 0.24498700  |
| C  | 4.05003400  | -0.22767200 | -1.32863900 |
| C  | 3.65824800  | 1.01458100  | -1.86374900 |
| C  | 4.98989000  | -0.98806500 | -2.04644000 |
| C  | 4.18943000  | 1.47948100  | -3.06825700 |
| H  | 2.93282100  | 1.62399000  | -1.33156300 |
| C  | 5.51941700  | -0.52851600 | -3.25777700 |
| H  | 5.31064300  | -1.94749500 | -1.64911800 |
| C  | 5.12081300  | 0.70698200  | -3.77173400 |
| H  | 3.87046300  | 2.44089600  | -3.46206900 |
| H  | 6.24362400  | -1.13545900 | -3.79463000 |
| H  | 5.52932200  | 1.06650000  | -4.71211600 |
| C  | 3.85657300  | 0.28139600  | 1.54247300  |
| C  | 4.83340900  | 1.27503600  | 1.35343900  |
| C  | 3.29642500  | 0.14634400  | 2.82900800  |

|   |            |             |             |
|---|------------|-------------|-------------|
| C | 5.22376900 | 2.10810600  | 2.40733000  |
| H | 5.29496900 | 1.40342500  | 0.37970300  |
| C | 3.68347600 | 0.97913700  | 3.87851400  |
| H | 2.54512800 | -0.61932400 | 3.01268700  |
| C | 4.65123100 | 1.96933300  | 3.67353700  |
| H | 5.97988000 | 2.86938900  | 2.23232300  |
| H | 3.22687300 | 0.85641400  | 4.85719300  |
| H | 4.95334600 | 2.62006100  | 4.48913100  |
| O | 0.69501200 | -3.14989900 | -0.05159500 |

|   |            |             |             |
|---|------------|-------------|-------------|
| H | 6.65505500 | -4.19991800 | -1.21472000 |
| C | 3.70551800 | 1.57531300  | -0.16429500 |
| C | 4.62163500 | 1.88355100  | -1.18345000 |
| C | 3.36115000 | 2.55880200  | 0.78038600  |
| C | 5.19369100 | 3.15549200  | -1.25071500 |
| H | 4.89432600 | 1.13179600  | -1.91896800 |
| C | 3.92987300 | 3.83269900  | 0.69892500  |
| H | 2.65791300 | 2.32165600  | 1.57506200  |
| C | 4.84693300 | 4.13336500  | -0.31225600 |
| H | 5.90652000 | 3.38341500  | -2.03827700 |
| H | 3.65974400 | 4.58679400  | 1.43269800  |
| H | 5.29097600 | 5.12310200  | -0.36872300 |
| O | 1.37451200 | 0.20131200  | 2.50719200  |

E-i/N-TS1

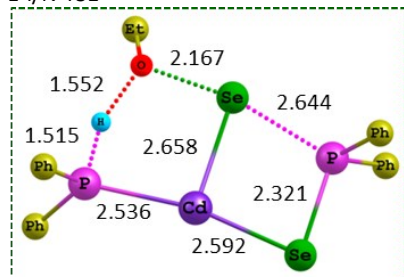

|    |             |             |             |
|----|-------------|-------------|-------------|
| Cd | 0.47921400  | -0.13088400 | -0.86438500 |
| Se | -0.57447500 | 0.11135200  | 1.56415300  |
| Se | -1.75003300 | -0.26300100 | -2.18057700 |
| P  | -2.65783000 | -0.01910300 | -0.05795800 |
| C  | -3.78792100 | -1.45324900 | 0.17392600  |
| C  | -3.40612900 | -2.46424700 | 1.06886800  |
| C  | -4.99874700 | -1.57719000 | -0.52908100 |
| C  | -4.22353000 | -3.58303900 | 1.25888400  |
| H  | -2.47214000 | -2.36968600 | 1.61605600  |
| C  | -5.81199600 | -2.69419100 | -0.33668500 |
| H  | -5.30602200 | -0.80081200 | -1.22352400 |
| C  | -5.42555200 | -3.69987200 | 0.55733800  |
| H  | -3.92076000 | -4.35841000 | 1.95706800  |
| H  | -6.74569500 | -2.78178600 | -0.88536200 |
| H  | -6.06100100 | -4.56862700 | 0.70539700  |
| C  | -3.80233600 | 1.42376700  | -0.12192000 |
| C  | -3.72707900 | 2.41206200  | -1.11362600 |
| C  | -4.70785500 | 1.59264300  | 0.94214000  |
| C  | -4.55099200 | 3.54019300  | -1.05109500 |
| H  | -3.03044000 | 2.29475200  | -1.93770200 |
| C  | -5.52951500 | 2.71882700  | 0.99999700  |
| H  | -4.77500000 | 0.84340700  | 1.72621700  |
| C  | -5.45413300 | 3.69703400  | 0.00264800  |
| H  | -4.48618000 | 4.29376800  | -1.83117300 |
| H  | -6.22654700 | 2.83263100  | 1.82557200  |
| H  | -6.09395200 | 4.57373100  | 0.04889500  |
| H  | 2.39606300  | -0.10819700 | 1.38080800  |
| C  | 1.46271800  | -0.59247000 | 3.67597200  |
| H  | 1.38034900  | -1.66618800 | 3.42992500  |
| H  | 0.62239200  | -0.35621900 | 4.34684600  |
| C  | 2.78144600  | -0.32745700 | 4.40426900  |
| H  | 2.84123700  | -0.92754100 | 5.32101700  |
| H  | 3.64006200  | -0.58641800 | 3.77403700  |
| H  | 2.86417800  | 0.73003200  | 4.67683000  |
| P  | 2.88107000  | -0.05400100 | -0.05349400 |
| C  | 4.10504900  | -1.35234100 | -0.45981200 |
| C  | 3.79467000  | -2.35899500 | -1.38739500 |
| C  | 5.35183900  | -1.38410500 | 0.19159100  |
| C  | 4.70795100  | -3.38332500 | -1.65497300 |
| H  | 2.84046300  | -2.34273500 | -1.90704900 |
| C  | 6.26437900  | -2.40330600 | -0.08320300 |
| H  | 5.60889500  | -0.61130600 | 0.91033700  |
| C  | 5.94362400  | -3.40653000 | -1.00470200 |
| H  | 4.45386400  | -4.15630400 | -2.37445700 |
| H  | 7.22386900  | -2.41695100 | 0.42592200  |

E-i/N-IM2

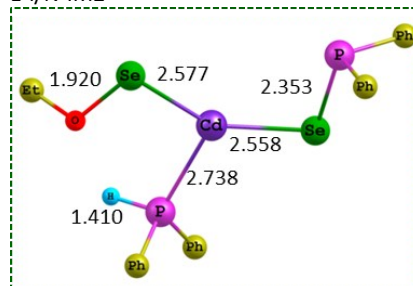

|    |             |             |             |
|----|-------------|-------------|-------------|
| Se | -1.47207200 | 1.01026500  | -0.03953700 |
| P  | -3.20487700 | -0.53619300 | -0.41840400 |
| C  | -4.56858700 | 0.65086000  | -0.82805300 |
| C  | -5.36450600 | 1.30647400  | 0.12559000  |
| C  | -4.81141100 | 0.89291800  | -2.19150500 |
| C  | -6.37487700 | 2.18390600  | -0.27579800 |
| H  | -5.19797200 | 1.12845700  | 1.18345600  |
| C  | -5.81747700 | 1.77474200  | -2.59309600 |
| H  | -4.20844200 | 0.38663700  | -2.94140300 |
| C  | -6.60279500 | 2.42244200  | -1.63477900 |
| H  | -6.98334500 | 2.68254300  | 0.47402900  |
| H  | -5.99086300 | 1.95085400  | -3.65122400 |
| H  | -7.38972900 | 3.10466600  | -1.94433900 |
| C  | -3.71326100 | -1.09588600 | 1.28030500  |
| C  | -4.66693300 | -2.13058700 | 1.31919100  |
| C  | -3.19268500 | -0.61885400 | 2.49120800  |
| C  | -5.10631800 | -2.65441600 | 2.53636600  |
| H  | -5.06896300 | -2.53019800 | 0.39058800  |
| C  | -3.62476000 | -1.15105600 | 3.71112100  |
| H  | -2.44496100 | 0.16842000  | 2.47903800  |
| C  | -4.58407500 | -2.16596000 | 3.73876100  |
| H  | -5.84666300 | -3.44978500 | 2.54504800  |
| H  | -3.20916500 | -0.76900100 | 4.63991400  |
| H  | -4.91708600 | -2.57905100 | 4.68684000  |
| Cd | 0.48526800  | -0.53014000 | -0.62415800 |
| Se | 1.24445500  | -2.87368700 | -1.38019800 |
| C  | 3.76809500  | -2.81048400 | -2.64725500 |
| H  | 3.53779900  | -3.85777300 | -2.89010000 |
| H  | 4.83679500  | -2.75942200 | -2.39677300 |
| C  | 3.45909000  | -1.90609800 | -3.83663100 |
| H  | 3.73260000  | -0.86760300 | -3.61920800 |
| H  | 4.02800500  | -2.23160300 | -4.71584600 |
| H  | 2.39467100  | -1.94003900 | -4.08774100 |
| P  | 2.87429000  | 0.71877700  | -0.14777300 |
| H  | 3.83887400  | 0.43769000  | -1.13734800 |
| C  | 2.94227900  | 2.54868700  | -0.11652300 |
| C  | 4.09102100  | 3.24104600  | -0.53880300 |
| C  | 1.82357600  | 3.27816600  | 0.31802200  |
| C  | 4.12021600  | 4.63677100  | -0.51949500 |
| H  | 4.96387300  | 2.69102300  | -0.87987800 |
| C  | 1.85891500  | 4.67516900  | 0.34350500  |

|   |            |             |             |
|---|------------|-------------|-------------|
| H | 0.91912600 | 2.76213800  | 0.62860700  |
| C | 3.00509300 | 5.35522400  | -0.07562000 |
| H | 5.01136700 | 5.16175900  | -0.85134700 |
| H | 0.98649900 | 5.22743200  | 0.67976900  |
| H | 3.02847800 | 6.44109700  | -0.06299700 |
| C | 3.72772500 | 0.12821400  | 1.37497800  |
| C | 4.02763700 | -1.24197200 | 1.47622200  |
| C | 4.02591200 | 0.98748300  | 2.44228600  |
| C | 4.63870400 | -1.73383900 | 2.63154900  |
| H | 3.78952600 | -1.91391200 | 0.65442600  |
| C | 4.62942400 | 0.48298000  | 3.59843400  |
| H | 3.79607200 | 2.04632700  | 2.37606800  |
| C | 4.93897600 | -0.87575800 | 3.69453600  |
| H | 4.87333200 | -2.79219300 | 2.70126700  |
| H | 4.85797400 | 1.15532700  | 4.42056900  |
| H | 5.40859200 | -1.26504200 | 4.59338000  |
| O | 3.11057800 | -2.42568600 | -1.43733300 |

H

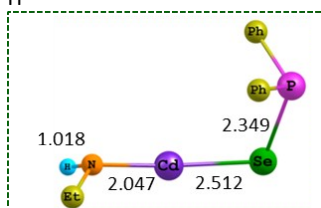

|    |             |             |             |
|----|-------------|-------------|-------------|
| Se | -0.36898000 | -0.88725600 | -2.10840000 |
| P  | -1.85308300 | 0.66356800  | -1.15466500 |
| C  | -0.71570700 | 1.91796800  | -0.39865400 |
| C  | -0.09060300 | 1.77815700  | 0.85357200  |
| C  | -0.45678600 | 3.07376700  | -1.15475800 |
| C  | 0.78035200  | 2.76187300  | 1.32834600  |
| H  | -0.29285900 | 0.90697600  | 1.47077000  |
| C  | 0.41610300  | 4.05769000  | -0.68115500 |
| H  | -0.93837600 | 3.20024900  | -2.12108300 |
| C  | 1.03783900  | 3.90315400  | 0.56083100  |
| H  | 1.25478600  | 2.63591800  | 2.29751900  |
| H  | 0.60583700  | 4.94412600  | -1.27994600 |
| H  | 1.71441900  | 4.66782200  | 0.93182000  |
| C  | -2.55310800 | -0.16689500 | 0.34916700  |
| C  | -3.21392400 | 0.64076700  | 1.29593400  |
| C  | -2.61352500 | -1.56032100 | 0.50343100  |
| C  | -3.88772000 | 0.07025300  | 2.37676300  |
| H  | -3.19823000 | 1.72295400  | 1.19507100  |
| C  | -3.29454400 | -2.13112700 | 1.58418100  |
| H  | -2.12796600 | -2.20260100 | -0.22487000 |
| C  | -3.92987300 | -1.32013200 | 2.52646200  |
| H  | -4.38110200 | 0.71267800  | 3.10101800  |
| H  | -3.32561800 | -3.21262400 | 1.68581100  |
| H  | -4.45632200 | -1.76409000 | 3.36649000  |
| Cd | 1.41773900  | -1.09104300 | -0.35384600 |
| N  | 2.79481200  | -1.20200600 | 1.15699900  |
| H  | 2.96806000  | -2.15858000 | 1.46029500  |
| C  | 4.05828600  | -0.45592900 | 1.10287300  |
| H  | 4.78033800  | -0.86843400 | 0.37688100  |
| H  | 3.83961800  | 0.56756700  | 0.77194400  |
| C  | 4.72799000  | -0.39988000 | 2.48096700  |
| H  | 4.97660900  | -1.40807500 | 2.83515500  |
| H  | 5.65944800  | 0.17834800  | 2.44023600  |
| H  | 4.05906400  | 0.05897800  | 3.21633600  |

H-i

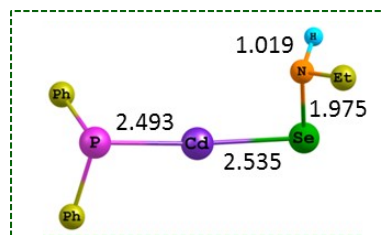

|    |             |             |             |
|----|-------------|-------------|-------------|
| P  | -1.30036300 | 0.10495800  | 1.21302500  |
| C  | -1.97853600 | 1.61797200  | 0.37330300  |
| C  | -2.37156200 | 2.68221600  | 1.20397900  |
| C  | -2.09731100 | 1.78600500  | -1.02000000 |
| C  | -2.86603800 | 3.87467700  | 0.66357800  |
| H  | -2.29055900 | 2.57371200  | 2.28225000  |
| C  | -2.59512700 | 2.97238200  | -1.56158400 |
| H  | -1.80458800 | 0.98024700  | -1.68838500 |
| C  | -2.97927300 | 4.02266800  | -0.71995200 |
| H  | -3.16271400 | 4.68358000  | 1.32553600  |
| H  | -2.67683200 | 3.07972700  | -2.63979900 |
| H  | -3.36160200 | 4.94777200  | -1.14194200 |
| C  | -2.36792800 | -1.28101500 | 0.58903800  |
| C  | -3.60746400 | -1.09034200 | -0.04482000 |
| C  | -1.97065100 | -2.60105600 | 0.88249300  |
| C  | -4.41203400 | -2.18282300 | -0.38693500 |
| H  | -3.95322300 | -0.08753200 | -0.27278900 |
| C  | -2.77050600 | -3.68974600 | 0.53577500  |
| H  | -1.02570900 | -2.78109700 | 1.39206800  |
| C  | -3.99835300 | -3.48613400 | -0.10462000 |
| H  | -5.36630700 | -2.00856900 | -0.87716700 |
| H  | -2.43627400 | -4.69731800 | 0.76817000  |
| H  | -4.62323900 | -4.33222800 | -0.37525900 |
| Cd | 0.76696900  | -0.27838000 | -0.12618000 |
| Se | 3.02209800  | -0.59094300 | -1.24192000 |
| N  | 3.64115600  | 0.58601400  | 0.21766200  |
| H  | 4.00106600  | 1.41498900  | -0.25395800 |
| C  | 4.71646700  | -0.01504800 | 1.02124900  |
| H  | 4.30819500  | -0.91120800 | 1.50123500  |
| H  | 5.57187200  | -0.34270700 | 0.40818000  |
| C  | 5.18764900  | 0.98265600  | 2.08188600  |
| H  | 5.96658500  | 0.53223800  | 2.70708500  |
| H  | 5.61143200  | 1.88327800  | 1.62114900  |
| H  | 4.35738700  | 1.28844800  | 2.72622100  |

I/H-i-IM1

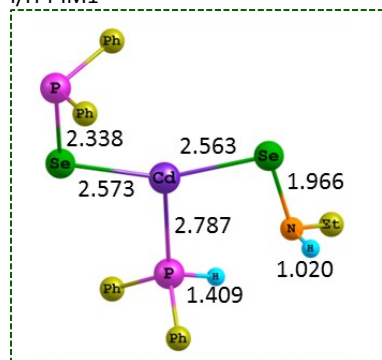

|    |             |             |             |
|----|-------------|-------------|-------------|
| Se | -0.95130400 | -2.11959400 | -0.48816100 |
| P  | -3.27882200 | -1.97437000 | -0.32820100 |
| C  | -3.67817600 | -0.42044200 | -1.25656500 |
| C  | -3.68890100 | 0.86686300  | -0.69115300 |
| C  | -3.98911600 | -0.55931500 | -2.62054000 |
| C  | -3.99141000 | 1.98462000  | -1.47362000 |
| H  | -3.46788300 | 0.99915400  | 0.36370600  |
| C  | -4.28543700 | 0.55874900  | -3.40445300 |
| H  | -3.99533700 | -1.54951100 | -3.06955800 |
| C  | -4.28679000 | 1.83425400  | -2.83237200 |

|    |             |             |             |
|----|-------------|-------------|-------------|
| H  | -3.99277000 | 2.97238700  | -1.02087100 |
| H  | -4.52074900 | 0.43256500  | -4.45774100 |
| H  | -4.51930800 | 2.70493600  | -3.43902500 |
| C  | -3.64026500 | -1.45968000 | 1.41978800  |
| C  | -4.98659600 | -1.18547500 | 1.73217200  |
| C  | -2.70183200 | -1.46057400 | 2.46085500  |
| C  | -5.37323600 | -0.89184000 | 3.04026800  |
| H  | -5.73909600 | -1.19514800 | 0.94697400  |
| C  | -3.09088700 | -1.17329500 | 3.77432800  |
| H  | -1.66305100 | -1.68896900 | 2.24353500  |
| C  | -4.42438800 | -0.88443600 | 4.06903500  |
| H  | -6.41552500 | -0.67356500 | 3.25674800  |
| H  | -2.34591200 | -1.17500000 | 4.56571200  |
| H  | -4.72499800 | -0.66051600 | 5.08870200  |
| Cd | -0.05987700 | 0.29162500  | -0.38059600 |
| Se | -0.28807500 | 2.83688300  | -0.18850200 |
| N  | 1.59947900  | 3.09855100  | 0.29568800  |
| H  | 1.57792600  | 3.42187700  | 1.26259900  |
| C  | 2.28490000  | 4.09958300  | -0.53395300 |
| H  | 2.25136800  | 3.74391800  | -1.57056300 |
| H  | 3.34197300  | 4.08200300  | -0.22412900 |
| C  | 1.76361400  | 5.53960700  | -0.46035400 |
| H  | 1.81077600  | 5.92203800  | 0.56667100  |
| H  | 2.36620900  | 6.20112300  | -1.09425700 |
| H  | 0.72452000  | 5.59758800  | -0.79936700 |
| P  | 2.71672300  | 0.05992200  | -0.33721800 |
| H  | 3.40865700  | 1.18570400  | -0.82523700 |
| C  | 3.42315900  | -0.04000800 | 1.35538700  |
| C  | 4.23786800  | 0.97809700  | 1.87406100  |
| C  | 3.10193500  | -1.14075600 | 2.16745700  |
| C  | 4.73055400  | 0.89198000  | 3.17935300  |
| H  | 4.48424600  | 1.84061300  | 1.26191900  |
| C  | 3.60110400  | -1.22715500 | 3.46848600  |
| H  | 2.46556100  | -1.93490200 | 1.78477300  |
| C  | 4.41525600  | -0.21056200 | 3.97803100  |
| H  | 5.36204100  | 1.68540000  | 3.56928400  |
| H  | 3.34920400  | -2.08542500 | 4.08471000  |
| H  | 4.79979000  | -0.27713300 | 4.99163100  |
| C  | 3.54000200  | -1.29984100 | -1.27355700 |
| C  | 4.94045100  | -1.42522600 | -1.30437700 |
| C  | 2.75598400  | -2.21898100 | -1.98624500 |
| C  | 5.54142400  | -2.44791100 | -2.03834800 |
| H  | 5.56162000  | -0.72787500 | -0.74871400 |
| C  | 3.36098400  | -3.24598300 | -2.71959100 |
| H  | 1.67205300  | -2.14515000 | -1.97073400 |
| C  | 4.75152200  | -3.36066600 | -2.74791700 |
| H  | 6.62422900  | -2.53439700 | -2.05640700 |
| H  | 2.74106100  | -3.95276300 | -3.26330300 |
| H  | 5.22114700  | -4.15755000 | -3.31751800 |

|   |             |             |             |
|---|-------------|-------------|-------------|
| C | 2.83082400  | -2.28565400 | 2.03653100  |
| C | 2.20814600  | -3.41266900 | 2.60232900  |
| C | 3.90750700  | -1.69502300 | 2.72330800  |
| C | 2.65558200  | -3.93923700 | 3.81696300  |
| H | 1.37258600  | -3.88040300 | 2.08946500  |
| C | 4.35651100  | -2.22351100 | 3.93648700  |
| H | 4.39516300  | -0.81835300 | 2.30621400  |
| C | 3.73061800  | -3.34625900 | 4.48578400  |
| H | 2.16265200  | -4.80998600 | 4.24004900  |
| H | 5.18957500  | -1.75514900 | 4.45319900  |
| H | 4.07588700  | -3.75465400 | 5.43135500  |
| C | 3.20626900  | -2.31254600 | -0.89906700 |
| C | 4.29137500  | -3.17856300 | -0.67463300 |
| C | 2.87527400  | -1.98159100 | -2.22855300 |
| C | 5.02112300  | -3.69584400 | -1.74853100 |
| H | 4.56485400  | -3.45425400 | 0.33896500  |
| C | 3.60828300  | -2.49915900 | -3.29702100 |
| H | 2.03381200  | -1.32341300 | -2.43410600 |
| C | 4.68668400  | -3.35933500 | -3.06303700 |
| H | 5.85287600  | -4.36751600 | -1.55327300 |
| H | 3.33107100  | -2.23465100 | -4.31384900 |
| H | 5.25395600  | -3.76589000 | -3.89511700 |
| P | 1.52837300  | 1.76031300  | 0.24832700  |
| C | 1.57031400  | 2.87011200  | 1.70921400  |
| C | 0.51668000  | 2.89313700  | 2.63562100  |
| C | 2.72736300  | 3.62907100  | 1.96787200  |
| C | 0.61656400  | 3.66348800  | 3.79748800  |
| H | -0.38364600 | 2.31981000  | 2.43670900  |
| C | 2.82097800  | 4.39789000  | 3.12887300  |
| H | 3.55139500  | 3.62819100  | 1.25996400  |
| C | 1.76645700  | 4.41636600  | 4.04815400  |
| H | -0.20953800 | 3.67773800  | 4.50286800  |
| H | 3.71659900  | 4.98456800  | 3.31335800  |
| H | 1.84083800  | 5.01637200  | 4.95057700  |
| C | 2.28163800  | 2.72108400  | -1.11633300 |
| C | 3.31770700  | 2.13741800  | -1.86285500 |
| C | 1.83121300  | 4.00878700  | -1.45299300 |
| C | 3.90040500  | 2.83492300  | -2.92574000 |
| H | 3.67182700  | 1.13931300  | -1.62021900 |
| C | 2.41597400  | 4.70235200  | -2.51278300 |
| H | 1.02311500  | 4.46499400  | -0.88867600 |
| C | 3.45125500  | 4.11667400  | -3.25096500 |
| H | 4.70261300  | 2.37502200  | -3.49568100 |
| H | 2.06114100  | 5.69725400  | -2.76649100 |
| H | 3.90333000  | 4.65839600  | -4.07692500 |
| N | -3.51331100 | -1.24093400 | -0.49784500 |
| H | -3.92149000 | -1.41860400 | -1.41508600 |
| C | -4.59216200 | -1.02614100 | 0.47581700  |
| H | -5.25658200 | -1.89996500 | 0.58570600  |
| H | -4.12460000 | -0.85807900 | 1.45236700  |
| C | -5.41288300 | 0.20114600  | 0.07048600  |
| H | -5.90136100 | 0.05020900  | -0.90016000 |
| H | -6.19791900 | 0.39598600  | 0.81008700  |
| H | -4.77399700 | 1.08660200  | -0.00442500 |

I/H-i-TS1

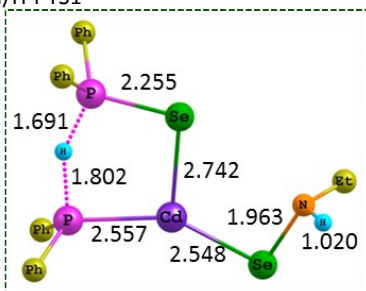

|    |             |             |             |
|----|-------------|-------------|-------------|
| Se | -2.45133600 | -2.84697500 | -0.11675500 |
| Cd | -0.28480900 | -1.52065600 | 0.08551900  |
| Se | -0.59248000 | 1.18228600  | -0.25664800 |
| P  | 2.24474700  | -1.54984200 | 0.46026000  |
| H  | 2.26960100  | 0.25129400  | 0.43240000  |

I/H-i-IM2



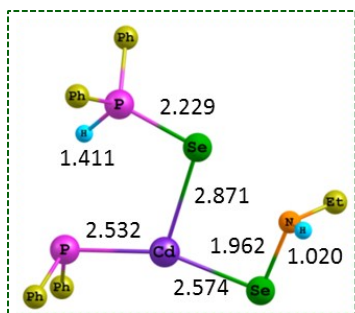

|    |             |             |             |
|----|-------------|-------------|-------------|
| Se | -1.52659700 | 3.39032600  | -1.19460900 |
| Cd | -1.16055200 | 1.02357200  | -0.25051800 |
| Se | 1.68607900  | 1.20664600  | -0.57314400 |
| P  | -1.73361100 | -1.23624700 | 0.73785800  |
| H  | 1.17951800  | -1.28438000 | 1.09682500  |
| C  | -3.01077500 | -0.80705500 | 2.01418700  |
| C  | -4.22921100 | -0.16123900 | 1.72839900  |
| C  | -2.72553500 | -1.11752200 | 3.35528900  |
| C  | -5.12776000 | 0.15927000  | 2.74677700  |
| H  | -4.47564900 | 0.09164500  | 0.70071700  |
| C  | -3.61900900 | -0.78522900 | 4.38004700  |
| H  | -1.79688100 | -1.62837900 | 3.59695200  |
| C  | -4.82394800 | -0.14783800 | 4.07875100  |
| H  | -6.06185500 | 0.65819500  | 2.50246800  |
| H  | -3.37452800 | -1.03263700 | 5.40968700  |
| H  | -5.52140800 | 0.10870500  | 4.87121600  |
| C  | -2.70526300 | -2.05123400 | -0.61315200 |
| C  | -3.85461300 | -2.81934800 | -0.34695700 |
| C  | -2.21728300 | -2.03954300 | -1.93495800 |
| C  | -4.49451800 | -3.53390200 | -1.36361300 |
| H  | -4.25614700 | -2.85955100 | 0.66100700  |
| C  | -2.85238200 | -2.75863700 | -2.94906800 |
| H  | -1.33307900 | -1.45543100 | -2.18206500 |
| C  | -3.99881500 | -3.50971900 | -2.67021300 |
| H  | -5.38452300 | -4.11257600 | -1.12962400 |
| H  | -2.45589200 | -2.72153900 | -3.96039500 |
| H  | -4.49968100 | -4.06266400 | -3.45964900 |
| P  | 2.24231200  | -0.75008900 | 0.33794000  |
| C  | 3.66872400  | -0.66077400 | 1.48543700  |
| C  | 4.14157100  | 0.58182700  | 1.92700800  |
| C  | 4.26501600  | -1.84233200 | 1.95817000  |
| C  | 5.20172200  | 0.64272000  | 2.83609200  |
| H  | 3.68191600  | 1.49300800  | 1.55606700  |
| C  | 5.32056700  | -1.77524600 | 2.86866600  |
| H  | 3.91374700  | -2.81088800 | 1.61386100  |
| C  | 5.78991900  | -0.53275200 | 3.30857900  |
| H  | 5.56519400  | 1.60925400  | 3.17252200  |
| H  | 5.77752900  | -2.69145000 | 3.23112300  |
| H  | 6.61347100  | -0.48314100 | 4.01512700  |
| C  | 2.56907000  | -2.11618000 | -0.82167100 |
| C  | 1.70151800  | -3.21887500 | -0.85545100 |
| C  | 3.64935300  | -2.04805100 | -1.71613500 |
| C  | 1.92339900  | -4.25203800 | -1.77106300 |
| H  | 0.85102300  | -3.26926000 | -0.18065000 |
| C  | 3.86880800  | -3.08522300 | -2.62225400 |
| H  | 4.31369900  | -1.18838900 | -1.70592300 |
| C  | 3.00577400  | -4.18722800 | -2.65145200 |
| H  | 1.24623900  | -5.10057700 | -1.79641400 |
| H  | 4.70744900  | -3.03106800 | -3.31018500 |
| H  | 3.17594000  | -4.99018000 | -3.36285500 |
| N  | 0.39060400  | 3.67874700  | -1.49311900 |
| H  | 0.47998400  | 3.80884300  | -2.50040000 |
| C  | 0.90217700  | 4.87209100  | -0.80279000 |
| H  | 0.30147200  | 5.77191200  | -1.01244000 |
| H  | 0.82731000  | 4.68210600  | 0.27371900  |

|   |            |            |             |
|---|------------|------------|-------------|
| C | 2.36045500 | 5.11953300 | -1.19656400 |
| H | 2.45206900 | 5.33403500 | -2.26857600 |
| H | 2.76011100 | 5.98176200 | -0.65081900 |
| H | 2.97857300 | 4.24506800 | -0.97032700 |

H/H-i-TS1

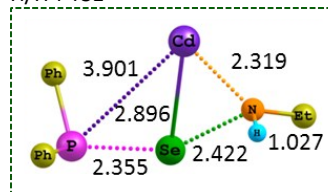

|    |             |             |             |
|----|-------------|-------------|-------------|
| Cd | -1.29079600 | 0.63769400  | -1.44356500 |
| C  | -4.28750900 | -0.40688500 | 0.03762100  |
| H  | -4.25602300 | 0.57532100  | 0.52709200  |
| H  | -5.00004300 | -0.31526400 | -0.79938600 |
| C  | -4.80355400 | -1.47071100 | 1.01634900  |
| H  | -4.89526400 | -2.44582000 | 0.52278400  |
| H  | -4.12501900 | -1.58265400 | 1.86732900  |
| H  | -5.79185000 | -1.19330100 | 1.40069100  |
| N  | -2.95439400 | -0.67390600 | -0.50140100 |
| H  | -2.92218600 | -1.64788200 | -0.82441000 |
| P  | 1.09275800  | -0.23615700 | 1.51786700  |
| Se | -1.21050600 | -0.59086700 | 1.17724900  |
| C  | 2.04401000  | -1.40012100 | 0.44867400  |
| C  | 1.46633400  | -2.54179000 | -0.13024000 |
| C  | 3.43848200  | -1.22468700 | 0.33760500  |
| C  | 2.25485800  | -3.47108600 | -0.81587400 |
| H  | 0.39655400  | -2.70195800 | -0.04149700 |
| C  | 4.22301500  | -2.15100700 | -0.35073100 |
| H  | 3.91486600  | -0.36005400 | 0.79214000  |
| C  | 3.63340400  | -3.27920300 | -0.93149100 |
| H  | 1.78726200  | -4.34587500 | -1.25978300 |
| H  | 5.29533300  | -1.99380600 | -0.42885500 |
| H  | 4.24461900  | -4.00215200 | -1.46424100 |
| C  | 1.47463300  | 1.40216900  | 0.79980400  |
| C  | 1.92180400  | 1.60754200  | -0.52122700 |
| C  | 1.26037800  | 2.52918700  | 1.62022100  |
| C  | 2.17992800  | 2.90103900  | -0.99161700 |
| H  | 2.10462000  | 0.75755300  | -1.17013200 |
| C  | 1.50292300  | 3.81580200  | 1.14323400  |
| H  | 0.90660800  | 2.38861800  | 2.63837700  |
| C  | 1.97352500  | 4.00453200  | -0.16352500 |
| H  | 2.53827600  | 3.03952100  | -2.00806400 |
| H  | 1.33771600  | 4.67186000  | 1.79143400  |
| H  | 2.17594100  | 5.00703700  | -0.52987400 |

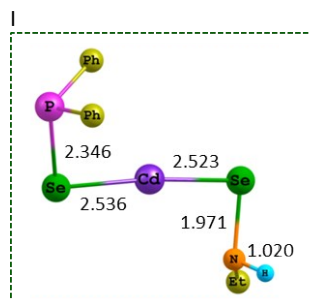

|    |            |             |             |
|----|------------|-------------|-------------|
| Se | 0.80674000 | -0.68312400 | 2.17191800  |
| P  | 2.68519800 | 0.28740000  | 1.15654200  |
| C  | 1.94104300 | 1.70357100  | 0.21412700  |
| C  | 1.39541800 | 1.59967800  | -1.07921500 |
| C  | 1.91177300 | 2.95244000  | 0.85801900  |
| C  | 0.82336600 | 2.71306300  | -1.70238200 |
| H  | 1.43745000 | 0.65349900  | -1.61207600 |
| C  | 1.33552500 | 4.06403500  | 0.23680500  |

|    |             |             |             |
|----|-------------|-------------|-------------|
| H  | 2.33809200  | 3.05179300  | 1.85301200  |
| C  | 0.78811000  | 3.94683600  | -1.04402300 |
| H  | 0.40972100  | 2.61609600  | -2.70245200 |
| H  | 1.31914800  | 5.02084200  | 0.75107500  |
| H  | 0.34270500  | 4.81057800  | -1.52908300 |
| C  | 3.16748200  | -0.85771000 | -0.22193800 |
| C  | 4.16528600  | -0.40054000 | -1.10557000 |
| C  | 2.71911300  | -2.18035100 | -0.34629300 |
| C  | 4.67461300  | -1.23413400 | -2.10177200 |
| H  | 4.54506800  | 0.61494900  | -1.01976100 |
| C  | 3.23597200  | -3.01802700 | -1.34144400 |
| H  | 1.96647500  | -2.55907900 | 0.33825600  |
| C  | 4.21028100  | -2.54867500 | -2.22408100 |
| H  | 5.43688400  | -0.85882900 | -2.77904800 |
| H  | 2.87285100  | -4.03902700 | -1.42248900 |
| H  | 4.60993100  | -3.19987000 | -2.99620500 |
| Cd | -0.98224300 | -0.18286800 | 0.44568600  |
| Se | -2.93324100 | 0.18611000  | -1.11024900 |
| N  | -3.79962600 | -1.35880100 | -0.24641400 |
| H  | -3.92305400 | -2.04121200 | -0.99373600 |
| C  | -5.10310200 | -1.05127200 | 0.35948200  |
| H  | -4.93535200 | -0.29119000 | 1.13070400  |
| H  | -5.40967900 | -1.97052000 | 0.88023800  |
| C  | -6.21876500 | -0.60086500 | -0.58928000 |
| H  | -6.42123600 | -1.36432900 | -1.35043000 |
| H  | -7.14827300 | -0.42468400 | -0.03510600 |
| H  | -5.94930100 | 0.32942900  | -1.10040300 |

|    |             |             |             |
|----|-------------|-------------|-------------|
| Cd | 0.00342500  | 0.40195600  | -0.06865000 |
| Se | 0.49496300  | 2.48555200  | -1.49647200 |
| C  | -2.30583700 | 4.13764600  | -1.34771600 |
| H  | -2.34599800 | 3.73304300  | -0.33074800 |
| H  | -3.33738600 | 4.21841100  | -1.71406700 |
| C  | -1.61443600 | 5.49830200  | -1.37072400 |
| H  | -1.60944800 | 5.91941600  | -2.38083300 |
| H  | -2.13496300 | 6.19835000  | -0.70534800 |
| H  | -0.57854100 | 5.41297600  | -1.02901100 |
| P  | -2.71638900 | -0.17227400 | -0.16715400 |
| H  | -3.48527000 | 0.75312700  | -0.90092500 |
| C  | -3.15273400 | -1.71756000 | -1.05990500 |
| C  | -4.13131900 | -1.72513700 | -2.06737300 |
| C  | -2.47597000 | -2.90909500 | -0.74942800 |
| C  | -4.43862100 | -2.90931000 | -2.74225900 |
| H  | -4.65304200 | -0.80917700 | -2.33032800 |
| C  | -2.79439500 | -4.09255600 | -1.41909700 |
| H  | -1.69503600 | -2.91668100 | 0.00684400  |
| C  | -3.77483900 | -4.09512100 | -2.41583100 |
| H  | -5.19530100 | -2.90341500 | -3.52158600 |
| H  | -2.26823000 | -5.00880600 | -1.16756800 |
| H  | -4.01568400 | -5.01540900 | -2.94002900 |
| C  | -3.64717500 | -0.19903600 | 1.41893200  |
| C  | -4.99816800 | 0.18476200  | 1.47673400  |
| C  | -2.99594500 | -0.59798300 | 2.59716900  |
| C  | -5.68578500 | 0.16326100  | 2.69154700  |
| H  | -5.51563700 | 0.49992600  | 0.57474900  |
| C  | -3.69039400 | -0.62650900 | 3.80997700  |
| H  | -1.94678700 | -0.88128500 | 2.57786600  |
| C  | -5.03340100 | -0.24553500 | 3.85943800  |
| H  | -6.72868700 | 0.46524800  | 2.72581000  |
| H  | -3.17634000 | -0.93890100 | 4.71421000  |
| H  | -5.56939400 | -0.26142600 | 4.80404200  |
| S  | -1.56139700 | 2.86969600  | -2.45805600 |

K/J-i-IM1

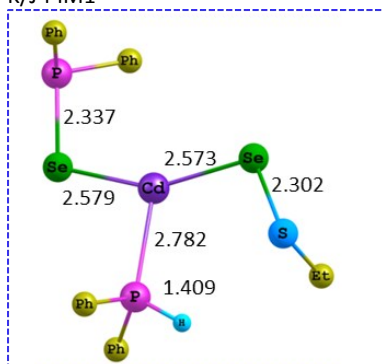

|    |            |             |             |
|----|------------|-------------|-------------|
| Se | 0.80014900 | -1.51251900 | 1.46409000  |
| P  | 3.13396100 | -1.43745800 | 1.56130400  |
| C  | 3.50531400 | 0.37720400  | 1.50655400  |
| C  | 3.65070900 | 1.12402000  | 0.32422900  |
| C  | 3.65140900 | 1.03421900  | 2.74078400  |
| C  | 3.92485300 | 2.49327400  | 0.37715300  |
| H  | 3.55979900 | 0.63598700  | -0.64160100 |
| C  | 3.92035600 | 2.40440400  | 2.79389600  |
| H  | 3.55176400 | 0.46804300  | 3.66361600  |
| C  | 4.05742200 | 3.13741900  | 1.61152800  |
| H  | 4.03057100 | 3.05561500  | -0.54635800 |
| H  | 4.02895400 | 2.89620800  | 3.75673000  |
| H  | 4.26891600 | 4.20224800  | 1.65025500  |
| C  | 3.73361800 | -1.98189100 | -0.10980800 |
| C  | 5.12463600 | -1.92425700 | -0.32646000 |
| C  | 2.92757800 | -2.55731400 | -1.10130400 |
| C  | 5.68478400 | -2.40079400 | -1.51214300 |
| H  | 5.77545700 | -1.49831700 | 0.43377700  |
| C  | 3.49014900 | -3.04145000 | -2.28799900 |
| H  | 1.85593900 | -2.62890400 | -0.94396400 |
| C  | 4.86761500 | -2.96246600 | -2.49981900 |
| H  | 6.75903800 | -2.33744900 | -1.66301300 |
| H  | 2.84617300 | -3.47872300 | -3.04644400 |
| H  | 5.30316000 | -3.33730100 | -3.42174800 |

K/J-i-TS1

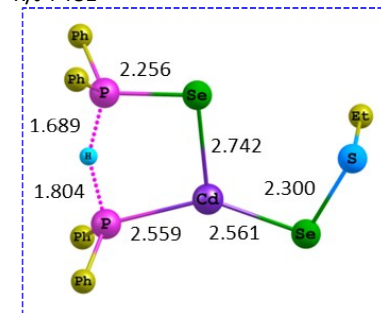

|    |             |             |             |
|----|-------------|-------------|-------------|
| Se | 4.15238600  | -0.08769200 | -0.49869300 |
| Cd | 1.62302200  | 0.20716100  | -0.22442700 |
| Se | 0.08132700  | -2.03809900 | -0.53945000 |
| P  | -0.23834100 | 1.89762600  | 0.25353700  |
| H  | -1.44747800 | 0.56257900  | 0.15868700  |
| C  | -0.14999900 | 2.68684700  | 1.90718100  |
| C  | 0.74433300  | 3.73796300  | 2.18424600  |
| C  | -0.96142600 | 2.20034000  | 2.94746000  |
| C  | 0.81359400  | 4.29278200  | 3.46278100  |
| H  | 1.38725200  | 4.12144600  | 1.39706000  |
| C  | -0.87841100 | 2.74674700  | 4.23196100  |
| H  | -1.66608900 | 1.39610500  | 2.75471700  |
| C  | 0.00573000  | 3.79607000  | 4.49229400  |
| H  | 1.50726300  | 5.10581200  | 3.65849200  |
| H  | -1.51143400 | 2.35610300  | 5.02382100  |
| H  | 0.06730500  | 4.22423500  | 5.48864800  |
| C  | -0.43046600 | 3.22848400  | -0.98896800 |
| C  | -1.13295500 | 4.41327600  | -0.69484700 |
| C  | 0.04601600  | 3.04083300  | -2.29996100 |

|   |             |             |             |
|---|-------------|-------------|-------------|
| C | -1.34073300 | 5.37988100  | -1.68049000 |
| H | -1.51397300 | 4.58211500  | 0.30791100  |
| C | -0.17737300 | 4.00308000  | -3.28750500 |
| H | 0.60673700  | 2.14425700  | -2.55285900 |
| C | -0.86795200 | 5.17916000  | -2.98165200 |
| H | -1.87746400 | 6.29110600  | -1.43047600 |
| H | 0.20388400  | 3.83812500  | -4.29138800 |
| H | -1.03114000 | 5.93301500  | -3.74623300 |
| P | -1.89191400 | -1.05032200 | -0.07169600 |
| C | -2.69472700 | -1.84835000 | 1.37208600  |
| C | -1.96949300 | -2.64495500 | 2.27079900  |
| C | -4.04721800 | -1.56537900 | 1.64332400  |
| C | -2.58726100 | -3.15599600 | 3.41616300  |
| H | -0.92843100 | -2.87321800 | 2.06372100  |
| C | -4.65894700 | -2.07855700 | 2.78768700  |
| H | -4.62621100 | -0.95346000 | 0.95710900  |
| C | -3.93039200 | -2.87535900 | 3.67802700  |
| H | -2.01651300 | -3.77832700 | 4.09962700  |
| H | -5.70482800 | -1.85827000 | 2.98215500  |
| H | -4.40866800 | -3.27543700 | 4.56742500  |
| C | -3.06389200 | -1.25784300 | -1.46155800 |
| C | -3.36742800 | -0.14288500 | -2.25935200 |
| C | -3.63644300 | -2.50327500 | -1.76998200 |
| C | -4.23655900 | -0.27086700 | -3.34694700 |
| H | -2.92774500 | 0.82544400  | -2.03667400 |
| C | -4.50476000 | -2.62641100 | -2.85487200 |
| H | -3.40201300 | -3.37354500 | -1.16397400 |
| C | -4.80580500 | -1.51100100 | -3.64511300 |
| H | -4.46609400 | 0.59758700  | -3.95751600 |
| H | -4.94252700 | -3.59303400 | -3.08723400 |
| H | -5.48014100 | -1.61076300 | -4.49083100 |
| C | 4.33184000  | -3.11682800 | 0.63632500  |
| H | 5.22634100  | -2.71939700 | 1.12399600  |
| H | 3.45954500  | -2.84811500 | 1.23996200  |
| C | 4.42774100  | -4.63444400 | 0.46397700  |
| H | 5.29820500  | -4.91366000 | -0.13865200 |
| H | 4.52768100  | -5.11360600 | 1.44484100  |
| H | 3.53231200  | -5.03850800 | -0.01958100 |
| S | 4.16716600  | -2.32780300 | -1.02183900 |

|   |             |             |             |
|---|-------------|-------------|-------------|
| H | -3.18113800 | -1.35554400 | 5.44157700  |
| H | -5.44096700 | -0.47686100 | 4.87330100  |
| C | -2.37716300 | -2.44172100 | -0.55414900 |
| C | -3.43727700 | -3.32367100 | -0.27129300 |
| C | -1.88149600 | -2.41492600 | -0.87297700 |
| C | -3.98582500 | -4.13357200 | -1.26962900 |
| H | -3.84088100 | -3.37883200 | 0.73508100  |
| C | -2.42522300 | -3.22869000 | -2.86861000 |
| H | -1.06499600 | -1.74452400 | -2.13387300 |
| C | -3.48434200 | -4.09304200 | -2.57355400 |
| H | -4.80906100 | -4.79935200 | -1.02336400 |
| H | -2.02722100 | -3.17674400 | -3.87863900 |
| H | -3.91469200 | -4.72016500 | -3.34895900 |
| P | 2.31851500  | -0.67385800 | 0.28334200  |
| C | 3.66204400  | -0.44288900 | 1.50548700  |
| C | 3.99511700  | 0.83853400  | 1.96264400  |
| C | 4.33428700  | -1.56540600 | 2.01874500  |
| C | 4.99355200  | 0.99681900  | 2.92809700  |
| H | 3.47765600  | 1.70370400  | 1.55929100  |
| C | 5.32702200  | -1.40091500 | 2.98553900  |
| H | 4.09098800  | -2.56253900 | 1.66308200  |
| C | 5.65750800  | -0.11986500 | 3.44097700  |
| H | 5.25015900  | 1.99294100  | 3.27629700  |
| H | 5.84341800  | -2.27117800 | 3.37979700  |
| H | 6.43274400  | 0.00548000  | 4.19138600  |
| C | 2.85276900  | -1.97376300 | -0.87257500 |
| C | 2.09774600  | -3.15163200 | -0.98357800 |
| C | 3.98265800  | -1.78577100 | -1.68460700 |
| C | 2.48116300  | -4.14009600 | -1.89490600 |
| H | 1.21185000  | -3.29742500 | -0.37124500 |
| C | 4.36206100  | -2.77822900 | -2.58764700 |
| H | 4.56025800  | -0.86825600 | -1.61426400 |
| C | 3.61149900  | -3.95528400 | -2.69425200 |
| H | 1.89190200  | -5.04818700 | -1.98005300 |
| H | 5.23783800  | -2.63137600 | -3.21276000 |
| H | 3.90667000  | -4.72379600 | -3.40273200 |
| C | 0.24053900  | 5.01871700  | -0.18538100 |
| H | -0.61530500 | 5.66556200  | 0.02597600  |
| H | 0.36157100  | 4.32117100  | 0.64891800  |
| C | 1.51237000  | 5.84172600  | -0.40102400 |
| H | 1.39667400  | 6.54447800  | -1.23258100 |
| H | 1.73713600  | 6.42075600  | 0.50232000  |
| H | 2.37319500  | 5.19918500  | -0.61376100 |
| S | -0.12717700 | 4.04992900  | -1.71098300 |

K/J-i-IM2

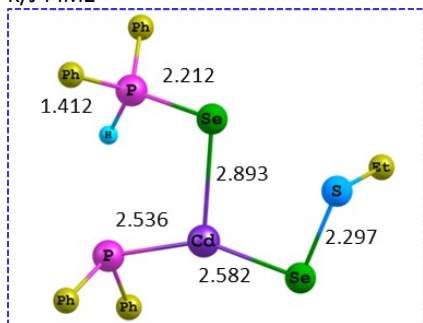

|    |             |             |             |
|----|-------------|-------------|-------------|
| Se | -2.12244100 | 3.04418500  | -1.17936400 |
| Cd | -1.21478900 | 0.80586700  | -0.26658900 |
| Se | 1.62431800  | 1.20615700  | -0.65262100 |
| P  | -1.51363700 | -1.48619100 | 0.77746800  |
| H  | 1.26454000  | -1.31555900 | 0.97025100  |
| C  | -2.83350100 | -1.17272400 | 2.04215400  |
| C  | -4.11606900 | -0.67634600 | 1.73909100  |
| C  | -2.51937900 | -1.41681300 | 3.39048100  |
| C  | -5.04835000 | -0.43422300 | 2.74872600  |
| H  | -4.38620900 | -0.47847900 | 0.70542300  |
| C  | -3.44816800 | -1.16232600 | 4.40600100  |
| H  | -1.54016200 | -1.81430900 | 3.64512100  |
| C  | -4.71628700 | -0.67250000 | 4.08795900  |
| H  | -6.03176100 | -0.04988300 | 2.49146100  |

J/J-i-TS1

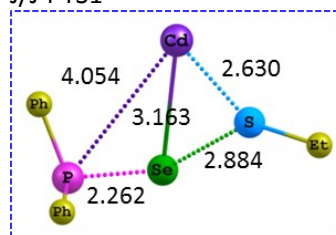

|    |             |             |             |
|----|-------------|-------------|-------------|
| Cd | 1.59924600  | -1.59525300 | -0.52884200 |
| C  | 4.03639300  | 1.99535000  | -0.41805300 |
| H  | 4.24036400  | 2.46642500  | 0.55053700  |
| H  | 4.93026000  | 1.41773300  | -0.68053000 |
| C  | 3.70551100  | 3.03621100  | -1.48574600 |
| H  | 3.50661600  | 2.56012000  | -2.45119300 |
| H  | 2.82053800  | 3.61674000  | -1.20689200 |
| H  | 4.54344600  | 3.73356500  | -1.61517100 |
| P  | -1.54125000 | 0.12417700  | 1.37309000  |
| Se | 0.66137700  | 0.23584500  | 1.87430300  |
| C  | -2.01068000 | 1.58895400  | 0.35357600  |
| C  | -1.14535900 | 2.20847200  | -0.56267000 |

|   |             |             |             |
|---|-------------|-------------|-------------|
| C | -3.30334400 | 2.10954200  | 0.53399000  |
| C | -1.57652900 | 3.31651600  | -1.29604400 |
| H | -0.13304800 | 1.83700900  | -0.69316300 |
| C | -3.73367700 | 3.21536800  | -0.20557300 |
| H | -3.97400700 | 1.65177400  | 1.25695000  |
| C | -2.87001400 | 3.82036100  | -1.12225700 |
| H | -0.89869200 | 3.78852000  | -2.00205600 |
| H | -4.73612200 | 3.60694300  | -0.05715000 |
| H | -3.19932500 | 4.68430000  | -1.69278100 |
| C | -1.79226400 | -1.29818400 | 0.24176700  |
| C | -2.49471400 | -1.19708700 | -0.97462700 |
| C | -1.35081000 | -2.57286400 | 0.65863400  |
| C | -2.75635100 | -2.33612800 | -1.73949000 |
| H | -2.83667500 | -0.22864200 | -1.32391600 |
| C | -1.62460500 | -3.71095200 | -0.10712000 |
| H | -0.82445700 | -2.67539700 | 1.60420900  |
| C | -2.33183000 | -3.59667200 | -1.30594000 |
| H | -3.29480800 | -2.23685100 | -2.67800800 |
| H | -1.28754400 | -4.68380300 | 0.23971500  |
| H | -2.54653800 | -4.47980100 | -1.90057800 |
| S | 2.69048500  | 0.75992500  | -0.10692900 |

N/M-i-IM1

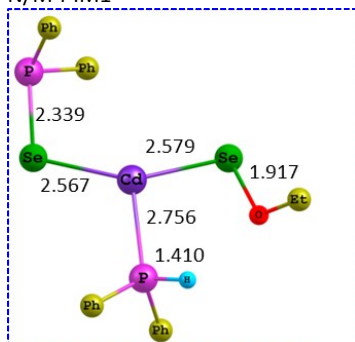

|    |             |             |             |
|----|-------------|-------------|-------------|
| Se | 1.00243300  | 1.66220000  | -1.43871800 |
| P  | 3.28791200  | 1.19277500  | -1.60089000 |
| C  | 3.34378100  | -0.65994600 | -1.57663700 |
| C  | 3.40492300  | -1.44115400 | -0.40863700 |
| C  | 3.31900100  | -1.31170800 | -2.82159100 |
| C  | 3.43030200  | -2.83679600 | -0.48702500 |
| H  | 3.44327600  | -0.96101100 | 0.56428700  |
| C  | 3.33626100  | -2.70698000 | -2.89976100 |
| H  | 3.28109700  | -0.72155100 | -3.73393600 |
| C  | 3.39105700  | -3.47312600 | -1.73235900 |
| H  | 3.48083700  | -3.42511500 | 0.42513900  |
| H  | 3.31175400  | -3.19325200 | -3.87107300 |
| H  | 3.40617800  | -4.55769000 | -1.79035200 |
| C  | 4.01089700  | 1.60764100  | 0.05891400  |
| C  | 5.35980300  | 1.25995200  | 0.27097200  |
| C  | 3.35561800  | 2.36441600  | 1.04049200  |
| C  | 6.02012800  | 1.63291500  | 1.44228300  |
| H  | 5.89822900  | 0.68823900  | -0.48130400 |
| C  | 4.02060000  | 2.74494400  | 2.21181200  |
| H  | 2.32196100  | 2.65890600  | 0.88711900  |
| C  | 5.35150400  | 2.37864300  | 2.41971900  |
| H  | 7.05745000  | 1.34460900  | 1.58962400  |
| H  | 3.49281100  | 3.32925700  | 2.96103600  |
| H  | 5.86623300  | 2.67387600  | 3.32970800  |
| Cd | -0.00014600 | -0.18488300 | 0.03568800  |
| Se | 0.22116100  | -2.49007700 | 1.17038300  |
| C  | -1.45989900 | -2.70375500 | 3.43283300  |
| H  | -0.85678800 | -3.59820100 | 3.64552000  |
| H  | -2.50182000 | -2.94323500 | 3.68690800  |
| C  | -0.97195400 | -1.52157600 | 4.26531300  |
| H  | -1.59588000 | -0.63769600 | 4.09172500  |

|   |             |             |             |
|---|-------------|-------------|-------------|
| H | -1.01919900 | -1.76733800 | 5.33307300  |
| H | 0.06424100  | -1.26963100 | 4.01996700  |
| P | -2.67440600 | 0.33198900  | 0.45788500  |
| H | -3.07034400 | -0.02267400 | 1.76383100  |
| C | -3.32886600 | 2.04104000  | 0.35316700  |
| C | -4.46920600 | 2.42604500  | 1.08107600  |
| C | -2.67865900 | 2.98884600  | -0.45311100 |
| C | -4.95163400 | 3.73306900  | 0.99703500  |
| H | -4.98297100 | 1.70376600  | 1.70968100  |
| C | -3.16860300 | 4.29555000  | -0.54056800 |
| H | -1.78407000 | 2.71789000  | -1.00689600 |
| C | -4.30277900 | 4.66892200  | 0.18396900  |
| H | -5.83123600 | 4.02064100  | 1.56585400  |
| H | -2.65595900 | 5.01914600  | -1.16734200 |
| H | -4.67840300 | 5.68616800  | 0.12056200  |
| C | -3.79744600 | -0.72484600 | -0.54960500 |
| C | -3.75094100 | -2.11697500 | -0.35665500 |
| C | -4.63125800 | -0.18619300 | -1.54006000 |
| C | -4.55013700 | -2.95196400 | -1.14036000 |
| H | -3.09459100 | -2.54014900 | 0.40065600  |
| C | -5.42174700 | -1.03170700 | -2.32456400 |
| H | -4.67310500 | 0.88705100  | -1.69867700 |
| C | -5.38481700 | -2.41388700 | -2.12539200 |
| H | -4.51408000 | -4.02618800 | -0.98277600 |
| H | -6.06220000 | -0.60647300 | -3.08875800 |
| H | -6.00030800 | -3.06870100 | -2.73563700 |
| O | -1.49405300 | -2.45101600 | 2.02624100  |

N/M-i-TS1

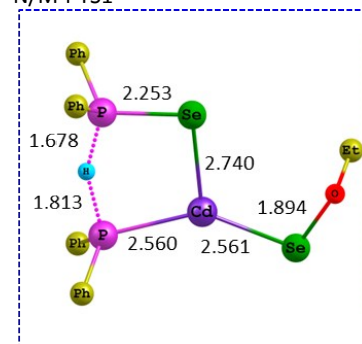

|    |             |             |             |
|----|-------------|-------------|-------------|
| Se | 4.10189800  | -1.22945600 | -0.27362200 |
| Cd | 1.69936500  | -0.36095100 | -0.09092300 |
| Se | -0.37043400 | -2.13242100 | -0.38689600 |
| P  | 0.32740200  | 1.77856200  | 0.21297900  |
| H  | -1.19146300 | 0.79215400  | 0.12065900  |
| C  | 0.55266700  | 2.66045200  | 1.80350400  |
| C  | 1.42828700  | 3.75198500  | 1.94882500  |
| C  | -0.14890300 | 2.20403700  | 2.93494800  |
| C  | 1.58792200  | 4.37279700  | 3.18914400  |
| H  | 1.98583900  | 4.11684800  | 1.09141400  |
| C  | 0.02536000  | 2.81764700  | 4.17773900  |
| H  | -0.83975200 | 1.36948400  | 2.84613800  |
| C  | 0.89140100  | 3.90664200  | 4.30921100  |
| H  | 2.26645900  | 5.21644200  | 3.28199200  |
| H  | -0.52418200 | 2.44954900  | 5.03971300  |
| H  | 1.02238600  | 4.38816000  | 5.27390400  |
| C  | 0.50371700  | 3.00512600  | -1.13663500 |
| C  | -0.20087200 | 4.22523000  | -1.08962800 |
| C  | 1.26310800  | 2.71588800  | -2.28455000 |
| C  | -0.13409400 | 5.12809000  | -2.15127400 |
| H  | -0.79985700 | 4.46948800  | -0.21678800 |
| C  | 1.31354900  | 3.61377700  | -3.35513600 |
| H  | 1.83269900  | 1.79207000  | -2.34159900 |
| C  | 0.61978200  | 4.82434600  | -3.29098300 |
| H  | -0.67802200 | 6.06690100  | -2.09164900 |

|   |             |             |             |
|---|-------------|-------------|-------------|
| H | 1.90836300  | 3.36989900  | -4.23087500 |
| H | 0.66743100  | 5.52680700  | -4.11801400 |
| P | -2.03380800 | -0.64640400 | -0.06858700 |
| C | -3.06923200 | -1.11910800 | 1.36850100  |
| C | -2.64790500 | -2.07956200 | 2.30009800  |
| C | -4.26979400 | -0.41968500 | 1.59767000  |
| C | -3.41870800 | -2.34353100 | 3.43648600  |
| H | -1.72493300 | -2.62464800 | 2.12703600  |
| C | -5.03503000 | -0.68737900 | 2.73310800  |
| H | -4.61172300 | 0.32766100  | 0.88682900  |
| C | -4.61138400 | -1.65048000 | 3.65606400  |
| H | -3.08566900 | -3.09544900 | 4.14628700  |
| H | -5.96186200 | -0.14480700 | 2.89647800  |
| H | -5.20884500 | -1.85802300 | 4.53912500  |
| C | -3.15722400 | -0.61185800 | -1.51068200 |
| C | -2.98044700 | 0.40018600  | -2.46877600 |
| C | -4.15630000 | -1.57987100 | -1.70651200 |
| C | -3.79458100 | 0.44562300  | -3.60331300 |
| H | -2.20846800 | 1.15278300  | -2.33407900 |
| C | -4.96914300 | -1.52892100 | -2.83977600 |
| H | -4.29786200 | -2.37092600 | -0.97617100 |
| C | -4.78971300 | -0.51726800 | -3.78961600 |
| H | -3.65107400 | 1.23307900  | -4.33744400 |
| H | -5.73849400 | -2.28207700 | -2.98416600 |
| H | -5.42255400 | -0.48191700 | -4.67173100 |
| C | 3.60814200  | -3.91922900 | 0.34071100  |
| H | 4.53825000  | -3.90212800 | 0.92781300  |
| H | 2.78404600  | -3.62963100 | 1.01223000  |
| C | 3.36385600  | -5.30724800 | -0.23847300 |
| H | 4.18713000  | -5.60064600 | -0.89721200 |
| H | 3.28577200  | -6.04240000 | 0.57129800  |
| H | 2.43484300  | -5.32757300 | -0.81671700 |
| O | 3.69270100  | -3.01376800 | -0.75904800 |

|   |             |             |             |
|---|-------------|-------------|-------------|
| C | -1.91651600 | -2.31681500 | -1.84146400 |
| C | -3.97013600 | -4.07546600 | -1.18025000 |
| H | -3.82907800 | -3.27003600 | 0.80505500  |
| C | -2.44587000 | -3.16859000 | -2.81312400 |
| H | -1.12095800 | -1.63073000 | -2.12494800 |
| C | -3.47952100 | -4.05283800 | -2.48895600 |
| H | -4.77377200 | -4.75644000 | -0.91180100 |
| H | -2.05715900 | -3.13011200 | -3.82734700 |
| H | -3.89923500 | -4.70924500 | -3.24575400 |
| P | 2.30372600  | -0.56153100 | 0.30177000  |
| C | 3.63731600  | -0.29997600 | 1.52811200  |
| C | 3.97332900  | 0.99304900  | 1.94894800  |
| C | 4.29830400  | -1.41012400 | 2.08130500  |
| C | 4.96454500  | 1.17524100  | 2.91756400  |
| H | 3.46365500  | 1.84837800  | 1.51575700  |
| C | 5.28357400  | -1.22152500 | 3.05130700  |
| H | 4.05245400  | -2.41636600 | 1.75413000  |
| C | 5.61761200  | 0.07108600  | 3.47003800  |
| H | 5.22357000  | 2.18013500  | 3.23756200  |
| H | 5.79154700  | -2.08209200 | 3.47655500  |
| H | 6.38717500  | 0.21508400  | 4.22293100  |
| C | 2.84134700  | -1.89702700 | -0.81097000 |
| C | 2.07655600  | -3.07048400 | -0.89810000 |
| C | 3.98209400  | -1.74149300 | -1.61455700 |
| C | 2.46145800  | -4.08754600 | -1.77674200 |
| H | 1.18172800  | -3.19102200 | -0.29316600 |
| C | 4.36252600  | -2.76202200 | -2.48530100 |
| H | 4.56709700  | -0.82743300 | -1.56289900 |
| C | 3.60254400  | -3.93501400 | -2.56753000 |
| H | 1.86508800  | -4.99251200 | -1.84357800 |
| H | 5.24655500  | -2.64037900 | -3.10415700 |
| H | 3.89882400  | -4.72560400 | -3.25080700 |
| C | 0.17771100  | 4.86928200  | -0.69858700 |
| H | -0.55584700 | 5.68843800  | -0.72324600 |
| H | 0.19660700  | 4.46917500  | 0.32738400  |
| C | 1.55608900  | 5.37507400  | -1.10629900 |
| H | 1.53249400  | 5.78314700  | -2.12156300 |
| H | 1.88246200  | 6.16590700  | -0.42020100 |
| H | 2.29065400  | 4.56401900  | -1.07692700 |
| O | -0.18723500 | 3.84457900  | -1.62301800 |

N/M-i-IM2

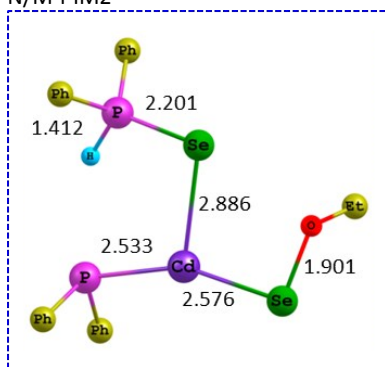

|    |             |             |             |
|----|-------------|-------------|-------------|
| Se | -1.94568400 | 3.17064700  | -1.36370100 |
| Cd | -1.22050100 | 0.92988100  | -0.31915400 |
| Se | 1.62057300  | 1.28360500  | -0.68561500 |
| P  | -1.55567000 | -1.32240900 | 0.78968000  |
| H  | 1.23997200  | -1.17791400 | 0.99634600  |
| C  | -2.89356200 | -0.96471200 | 2.02323400  |
| C  | -4.18287100 | -0.51342200 | 1.68136100  |
| C  | -2.58830400 | -1.12672000 | 3.38585100  |
| C  | -5.13022900 | -0.23538700 | 2.66738200  |
| H  | -4.44616500 | -0.37929300 | 0.63581200  |
| C  | -3.53221400 | -0.83502100 | 4.37710100  |
| H  | -1.60410300 | -1.48946000 | 3.67140300  |
| C  | -4.80703400 | -0.39103900 | 4.02087700  |
| H  | -6.11903900 | 0.11221100  | 2.38014800  |
| H  | -3.27164200 | -0.96432200 | 5.42420700  |
| H  | -5.54364700 | -0.16765000 | 4.78747000  |
| C  | -2.40088600 | -2.32560200 | -0.51852400 |
| C  | -3.43526200 | -3.22829400 | -0.20598500 |

M/M-i-TS1

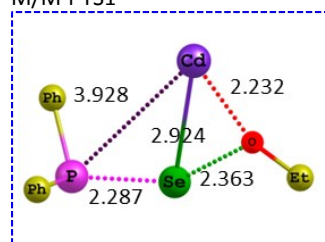

|    |             |             |             |
|----|-------------|-------------|-------------|
| Cd | 1.36561300  | -1.27549700 | -1.06056300 |
| C  | 4.13300000  | 0.59740000  | 0.20648000  |
| H  | 4.27686300  | 0.75247400  | 1.28961400  |
| H  | 4.95401600  | -0.06742600 | -0.11153800 |
| C  | 4.21933800  | 1.93520100  | -0.52895400 |
| H  | 4.10551300  | 1.78950400  | -1.60906700 |
| H  | 3.42778000  | 2.61182900  | -0.18958700 |
| H  | 5.18681800  | 2.42021600  | -0.34705800 |
| P  | -1.16378300 | 0.37362800  | 1.45134200  |
| Se | 1.10164500  | 0.06796300  | 1.52303500  |
| C  | -1.57040900 | 1.81527700  | 0.37632200  |
| C  | -0.60020800 | 2.61395800  | -0.24874300 |
| C  | -2.92515800 | 2.18620200  | 0.26781500  |
| C  | -0.97696700 | 3.74628100  | -0.97821600 |
| H  | 0.44948900  | 2.35207500  | -0.16199700 |



|   |             |             |             |
|---|-------------|-------------|-------------|
| C | -3.29858000 | 3.31218700  | -0.46701000 |
| H | -3.69231300 | 1.59316700  | 0.75964100  |
| C | -2.32395600 | 4.09740000  | -1.09264800 |
| H | -0.21295900 | 4.35149700  | -1.45845300 |
| H | -4.34864200 | 3.58027400  | -0.54409200 |
| H | -2.61365500 | 4.97745800  | -1.65973800 |
| C | -1.88152900 | -1.05318600 | 0.55468300  |
| C | -2.28987600 | -1.01368500 | -0.79284900 |
| C | -2.01210600 | -2.26368200 | 1.26493100  |
| C | -2.83758000 | -2.14850400 | -1.40153000 |
| H | -2.20428200 | -0.09213500 | -1.35939400 |
| C | -2.54519300 | -3.39583100 | 0.65022200  |
| H | -1.69550700 | -2.31214500 | 2.30349600  |
| C | -2.96877000 | -3.33831200 | -0.68359700 |
| H | -3.15842400 | -2.09784100 | -2.43841900 |
| H | -2.64146900 | -4.31987000 | 1.21325400  |
| H | -3.39558300 | -4.21744500 | -1.15788900 |
| O | 2.91021700  | -0.06964400 | 0.00793700  |

1a Ph<sub>2</sub>P-OOCR

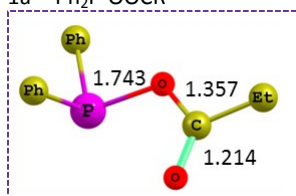

|   |             |             |             |
|---|-------------|-------------|-------------|
| O | -2.80301300 | -0.75467200 | -1.00780000 |
| C | -2.18411400 | -1.40192400 | -0.18833700 |
| C | -2.77720200 | -2.44388500 | 0.73940800  |
| H | -2.22471600 | -3.37825300 | 0.57986300  |
| H | -2.54465300 | -2.13612500 | 1.76668400  |
| C | -4.27975700 | -2.64313600 | 0.54546700  |
| H | -4.65289400 | -3.40083400 | 1.24141000  |
| H | -4.82664000 | -1.71283900 | 0.72149000  |
| H | -4.50566400 | -2.96916800 | -0.47349100 |
| O | -0.84978000 | -1.26284500 | 0.01322500  |
| P | 0.03646100  | -0.21535200 | -1.06235500 |
| C | -0.26482600 | 1.42315700  | -0.25465900 |
| C | -1.16443900 | 2.28835800  | -0.89966800 |
| C | 0.34982500  | 1.84444500  | 0.93630000  |
| C | -1.45061400 | 3.54555500  | -0.36137300 |
| H | -1.65012800 | 1.96839300  | -1.81715800 |
| C | 0.06392200  | 3.10086400  | 1.47340500  |
| H | 1.05813900  | 1.19429100  | 1.44060000  |
| C | -0.83620500 | 3.95313300  | 0.82527600  |
| H | -2.15111800 | 4.20341800  | -0.86765700 |
| H | 0.54654600  | 3.41680000  | 2.39410900  |
| H | -1.05482500 | 4.93179700  | 1.24325400  |
| C | 1.70031900  | -0.66103100 | -0.40026300 |
| C | 2.80756700  | -0.18487000 | -1.12324900 |
| C | 1.92377700  | -1.47191800 | 0.72299700  |
| C | 4.10854200  | -0.48592600 | -0.71679500 |
| H | 2.65411000  | 0.42462100  | -2.01133400 |
| C | 3.22742000  | -1.78340300 | 1.12148400  |
| H | 1.07934600  | -1.86333700 | 1.27919500  |
| C | 4.32182100  | -1.28887400 | 0.40781700  |
| H | 4.95274800  | -0.10443000 | -1.28398500 |
| H | 3.38589700  | -2.41407600 | 1.99201400  |
| H | 5.33306700  | -1.53310300 | 0.72008300  |

a-TS1

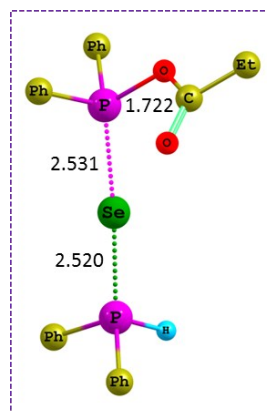

|    |             |             |             |
|----|-------------|-------------|-------------|
| Se | 0.38000900  | 0.01134900  | -0.63343000 |
| P  | 2.87590100  | -0.06110800 | -0.97245500 |
| H  | 3.32507000  | -0.17512700 | -2.31159800 |
| C  | 3.78722200  | -1.47395900 | -0.24078500 |
| C  | 4.64155600  | -2.28181900 | -1.00813700 |
| C  | 3.58265100  | -1.79001100 | 1.11326800  |
| C  | 5.29024000  | -3.37732300 | -0.42940100 |
| H  | 4.80266300  | -2.05845400 | -2.05948900 |
| C  | 4.23970900  | -2.87684800 | 1.69163000  |
| H  | 2.90000600  | -1.19044200 | 1.70948400  |
| C  | 5.09445100  | -3.67367000 | 0.92178100  |
| H  | 5.94815200  | -3.99494900 | -1.03447500 |
| H  | 4.07676900  | -3.10834600 | 2.74048400  |
| H  | 5.59980900  | -4.52331900 | 1.37206900  |
| C  | 3.78306700  | 1.44832600  | -0.41518500 |
| C  | 3.04113900  | 2.61032200  | -0.15733000 |
| C  | 5.17889400  | 1.47247200  | -0.25754800 |
| C  | 3.68865700  | 3.78446500  | 0.24102900  |
| H  | 1.95957600  | 2.58732800  | -0.25996600 |
| C  | 5.82164100  | 2.64548100  | 0.14329100  |
| H  | 5.76389300  | 0.57533000  | -0.43926900 |
| C  | 5.07715700  | 3.80417100  | 0.39127600  |
| H  | 3.10471500  | 4.67908200  | 0.43826500  |
| H  | 6.90146800  | 2.65442500  | 0.26384000  |
| H  | 5.57879300  | 4.71568600  | 0.70440100  |
| P  | -2.11097100 | -0.07689700 | -0.19239200 |
| C  | -2.87194800 | -1.66495200 | -0.71065000 |
| C  | -2.14572000 | -2.83947900 | -0.45020700 |
| C  | -4.10917400 | -1.75540300 | -1.36796600 |
| C  | -2.66229600 | -4.08372100 | -0.81570800 |
| H  | -1.17029900 | -2.77628300 | 0.02384800  |
| C  | -4.61750900 | -3.00327800 | -1.74109500 |
| H  | -4.66685700 | -0.85375500 | -1.59441700 |
| C  | -3.89928200 | -4.16909700 | -1.46248700 |
| H  | -2.09169200 | -4.98423800 | -0.60706400 |
| H  | -5.57474900 | -3.06149700 | -2.25206500 |
| H  | -4.29654400 | -5.13721200 | -1.75448200 |
| C  | -2.64156200 | 0.12149100  | 1.55999300  |
| C  | -1.80276500 | 0.84583900  | 2.42107200  |
| C  | -3.83635000 | -0.42414800 | 2.05783300  |
| C  | -2.15955500 | 1.03039700  | 3.75869900  |
| H  | -0.87646400 | 1.26177500  | 2.03686700  |
| C  | -4.19058300 | -0.23704900 | 3.39570200  |
| H  | -4.48587000 | -1.00085800 | 1.40639900  |
| C  | -3.35258400 | 0.49015200  | 4.24740100  |
| H  | -1.50566300 | 1.59486300  | 4.41742000  |
| H  | -5.11551100 | -0.66395500 | 3.77362700  |
| H  | -3.62780300 | 0.63160200  | 5.28899800  |
| O  | -3.21217500 | 0.94194200  | -1.03782100 |
| C  | -3.06838900 | 2.29771800  | -0.99314800 |
| C  | -4.01261600 | 2.97418600  | -1.96675700 |
| H  | -3.78005600 | 2.58495500  | -2.96614900 |

|   |             |            |             |
|---|-------------|------------|-------------|
| H | -5.02763800 | 2.62291100 | -1.74246200 |
| O | -2.28539900 | 2.85797700 | -0.25921600 |
| C | -3.92831500 | 4.49966100 | -1.92841700 |
| H | -2.91896600 | 4.84376300 | -2.17009500 |
| H | -4.62489300 | 4.93426400 | -2.65219000 |
| H | -4.17801600 | 4.88376700 | -0.93529100 |

2a Ph<sub>2</sub>P(Se)-OOCR

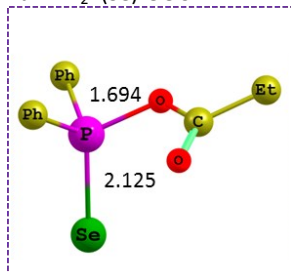

|    |             |             |             |
|----|-------------|-------------|-------------|
| P  | -0.12272700 | -0.16468900 | 0.42084800  |
| C  | -1.80178900 | -0.45983000 | -0.24211100 |
| C  | -2.88963100 | 0.07670300  | 0.46539000  |
| C  | -2.03462500 | -1.19391200 | -1.41516700 |
| C  | -4.19080400 | -0.10556700 | -0.00405600 |
| H  | -2.71766200 | 0.62092100  | 1.38915700  |
| C  | -3.34121400 | -1.37890500 | -1.87695700 |
| H  | -1.20233500 | -1.62638800 | -1.95767400 |
| C  | -4.41954300 | -0.83445500 | -1.17565200 |
| H  | -5.02528200 | 0.31301900  | 0.55084300  |
| H  | -3.51322500 | -1.95371300 | -2.78256000 |
| H  | -5.43367700 | -0.98207900 | -1.53581900 |
| C  | 0.37799200  | 1.49719200  | -0.15863000 |
| C  | 1.24725100  | 2.27462400  | 0.61864800  |
| C  | -0.10118400 | 1.99779000  | -1.38027200 |
| C  | 1.63836200  | 3.53838800  | 0.17427600  |
| H  | 1.61224900  | 1.88320700  | 1.56276800  |
| C  | 0.29529500  | 3.26231900  | -1.82115100 |
| H  | -0.78734500 | 1.41159000  | -1.98377600 |
| C  | 1.16441900  | 4.03384900  | -1.04432600 |
| H  | 2.31405000  | 4.13470800  | 0.78038300  |
| H  | -0.08077500 | 3.64551400  | -2.76542400 |
| H  | 1.46859500  | 5.01912700  | -1.38628800 |
| Se | 0.09015600  | -0.53087800 | 2.50363000  |
| O  | 0.69722600  | -1.23922300 | -0.60079400 |
| C  | 2.07058500  | -1.35141100 | -0.63731900 |
| O  | 2.81112300  | -0.58974600 | -0.06668900 |
| C  | 2.47848400  | -2.54154700 | -1.47799900 |
| H  | 2.02773000  | -3.42899700 | -1.01540700 |
| H  | 1.99284500  | -2.44073600 | -2.45678100 |
| C  | 3.99320000  | -2.69090400 | -1.61527300 |
| H  | 4.23067500  | -3.57208500 | -2.21904500 |
| H  | 4.43522000  | -1.81382700 | -2.09651400 |
| H  | 4.46696600  | -2.80432500 | -0.63655000 |

1b Ph<sub>2</sub>P-PPh<sub>2</sub>

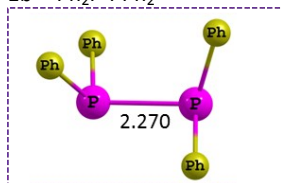

|   |             |            |             |
|---|-------------|------------|-------------|
| P | 0.51739400  | 0.36280200 | -1.48919700 |
| C | 0.40082400  | 1.83719500 | -0.36967500 |
| C | 0.75535300  | 1.86324200 | 0.99157800  |
| C | -0.10667000 | 3.01298000 | -0.95175300 |
| C | 0.60477400  | 3.03030200 | 1.74352000  |
| H | 1.14918900  | 0.97197900 | 1.46695300  |

|   |             |             |             |
|---|-------------|-------------|-------------|
| C | -0.25615500 | 4.18190600  | -0.19956700 |
| H | -0.38519400 | 3.00923100  | -2.00232200 |
| C | 0.09886800  | 4.19211100  | 1.15125000  |
| H | 0.88222800  | 3.03042400  | 2.79396600  |
| H | -0.64627500 | 5.08030800  | -0.66960400 |
| H | -0.01559300 | 5.09837600  | 1.73928500  |
| C | 2.26257500  | -0.23103000 | -1.27408700 |
| C | 2.61173900  | -1.49332300 | -1.79393100 |
| C | 3.28805300  | 0.57945300  | -0.75935700 |
| C | 3.93378800  | -1.93836600 | -1.77133900 |
| H | 1.84373300  | -2.13571800 | -2.21526900 |
| C | 4.61411600  | 0.13453000  | -0.74466400 |
| H | 3.05945600  | 1.56494200  | -0.36861100 |
| C | 4.94350700  | -1.12637300 | -1.24433400 |
| H | 4.17535000  | -2.91949900 | -2.17092100 |
| H | 5.38858600  | 0.78028200  | -0.33968300 |
| H | 5.97335100  | -1.47117500 | -1.23015000 |
| P | -0.59387400 | -1.39080000 | -0.57130500 |
| C | -0.36799200 | -1.34652900 | 1.26622300  |
| C | -1.34964400 | -0.95051800 | 2.18909800  |
| C | 0.85968800  | -1.82965300 | 1.76211000  |
| C | -1.10600300 | -1.01998800 | 3.56428600  |
| H | -2.31138300 | -0.59149500 | 1.84030300  |
| C | 1.10730600  | -1.88218800 | 3.13423000  |
| H | 1.62585000  | -2.16632800 | 1.06937000  |
| C | 0.12353400  | -1.47755400 | 4.04281900  |
| H | -1.88158300 | -0.71252600 | 4.26055000  |
| H | 2.06407200  | -2.25115200 | 3.49333700  |
| H | 0.31103900  | -1.52828900 | 5.11152700  |
| C | -2.35363300 | -0.88061500 | -0.84465000 |
| C | -3.19494800 | -1.84073800 | -1.43296500 |
| C | -2.89314400 | 0.38088300  | -0.53570600 |
| C | -4.53754600 | -1.55527500 | -1.69795900 |
| H | -2.79281100 | -2.81777800 | -1.68696400 |
| C | -4.23306300 | 0.66913400  | -0.80513300 |
| H | -2.26857600 | 1.14345300  | -0.08302700 |
| C | -5.05904700 | -0.29821500 | -1.38548800 |
| H | -5.17066900 | -2.31240300 | -2.15183400 |
| H | -4.63050500 | 1.65070200  | -0.56201400 |
| H | -6.10074200 | -0.07159800 | -1.59438700 |

b-TS1

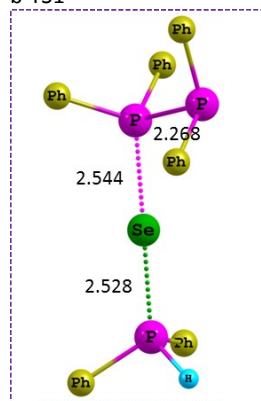

|   |             |             |            |
|---|-------------|-------------|------------|
| P | 1.27179100  | 0.50915800  | 0.20891500 |
| C | 1.89761800  | -0.29017700 | 1.75251300 |
| C | 3.20985000  | -0.13732900 | 2.23809100 |
| C | 1.00488300  | -1.12091200 | 2.45135300 |
| C | 3.61412000  | -0.80054500 | 3.39902400 |
| H | 3.91747900  | 0.49446900  | 1.71265900 |
| C | 1.41381600  | -1.78208900 | 3.61330000 |
| H | -0.00792800 | -1.24330300 | 2.07699200 |
| C | 2.71797500  | -1.62403200 | 4.08909100 |
| H | 4.63059700  | -0.67491700 | 3.76171400 |



|    |             |             |             |
|----|-------------|-------------|-------------|
| H  | 0.71124600  | -2.41836800 | 4.14437800  |
| H  | 3.03633100  | -2.13833100 | 4.99180300  |
| C  | 1.60491200  | 2.31060200  | 0.40822100  |
| C  | 1.41204400  | 3.15252900  | -0.70399100 |
| C  | 1.92131900  | 2.89258500  | 1.64633100  |
| C  | 1.56147800  | 4.53439900  | -0.58384100 |
| H  | 1.13776200  | 2.72564500  | -1.66398700 |
| C  | 2.06320500  | 4.27911200  | 1.76432400  |
| H  | 2.05566000  | 2.27002500  | 2.52406700  |
| C  | 1.89037400  | 5.10428900  | 0.65127200  |
| H  | 1.41412700  | 5.16676500  | -1.45507800 |
| H  | 2.30903800  | 4.71025600  | 2.73099900  |
| H  | 2.00324000  | 6.18073500  | 0.74453300  |
| P  | 2.56836200  | 0.00255100  | -1.58226400 |
| C  | 4.32772400  | 0.04045300  | -1.00063700 |
| C  | 5.13937700  | -1.09237300 | -0.82292700 |
| C  | 4.90858700  | 1.31294100  | -0.82554200 |
| C  | 6.48432200  | -0.95720400 | -0.46324200 |
| H  | 4.72879200  | -2.08508900 | -0.97009600 |
| C  | 6.24606700  | 1.44542600  | -0.44996400 |
| H  | 4.30957600  | 2.20562200  | -0.98302100 |
| C  | 7.04140000  | 0.30863300  | -0.26750200 |
| H  | 7.09496800  | -1.84707200 | -0.33535600 |
| H  | 6.66957000  | 2.43664200  | -0.31264500 |
| H  | 8.08577400  | 0.41030800  | 0.01377400  |
| C  | 2.18545600  | -1.79105700 | -1.81423400 |
| C  | 1.81802400  | -2.17809800 | -3.11419600 |
| C  | 2.21990500  | -2.77082100 | -0.80595100 |
| C  | 1.50511100  | -3.50918200 | -3.40499900 |
| H  | 1.76961800  | -1.42986600 | -3.90063400 |
| C  | 1.90078200  | -4.09927400 | -1.09444000 |
| H  | 2.48956600  | -2.50046300 | 0.20937700  |
| C  | 1.54557800  | -4.47248100 | -2.39463500 |
| H  | 1.22370700  | -3.78855300 | -4.41646400 |
| H  | 1.92563900  | -4.84158700 | -0.30132500 |
| H  | 1.29769200  | -5.50692500 | -2.61597700 |
| Se | -1.17421800 | 0.04564400  | -0.31500700 |
| P  | -3.63305300 | -0.32084900 | -0.77371200 |
| H  | -3.95929800 | -0.96502600 | -1.99321700 |
| C  | -4.66228700 | 1.20765800  | -0.89950600 |
| C  | -6.04898800 | 1.15650200  | -1.12258500 |
| C  | -4.03111500 | 2.45328400  | -0.77782600 |
| C  | -6.78968700 | 2.33503400  | -1.22553300 |
| H  | -6.55183300 | 0.19682300  | -1.20715100 |
| C  | -4.77632600 | 3.63329000  | -0.87990700 |
| H  | -2.95915800 | 2.49050800  | -0.60269500 |
| C  | -6.15337100 | 3.57612900  | -1.10410000 |
| H  | -7.86132300 | 2.28605200  | -1.39842100 |
| H  | -4.27825400 | 4.59394600  | -0.78264500 |
| H  | -6.73155800 | 4.49271500  | -1.18291500 |
| C  | -4.56117500 | -1.41131900 | 0.37407800  |
| C  | -5.06192600 | -2.65561400 | -0.04060500 |
| C  | -4.70628700 | -1.03309200 | 1.71990200  |
| C  | -5.70519600 | -3.50045400 | 0.86940100  |
| H  | -4.95236900 | -2.96875900 | -1.07565700 |
| C  | -5.35753700 | -1.87288800 | 2.62402600  |
| H  | -4.30691400 | -0.08124000 | 2.05995700  |
| C  | -5.85763000 | -3.11002100 | 2.20206200  |
| H  | -6.08948500 | -4.45983800 | 0.53400600  |
| H  | -5.46925800 | -1.56484700 | 3.65991100  |
| H  | -6.36050900 | -3.76452600 | 2.90830400  |

2b  $\text{Ph}_2\text{P}(\text{Se})\text{-PPh}_2$

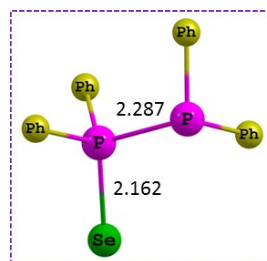

|    |             |             |             |
|----|-------------|-------------|-------------|
| P  | 0.50786900  | -0.97840100 | -0.01527200 |
| C  | 0.31003500  | -0.41073200 | 1.72900400  |
| C  | -0.26315800 | -1.28001900 | 2.66877400  |
| C  | 0.68438400  | 0.88540600  | 2.12836200  |
| C  | -0.45073100 | -0.86487600 | 3.98988800  |
| H  | -0.55665400 | -2.27777500 | 2.35534500  |
| C  | 0.49220600  | 1.29597100  | 3.44944800  |
| H  | 1.12574000  | 1.57550200  | 1.41786000  |
| C  | -0.07498500 | 0.42240900  | 4.38292600  |
| H  | -0.89020000 | -1.54977900 | 4.70951700  |
| H  | 0.78614700  | 2.29872200  | 3.74624900  |
| H  | -0.22183900 | 0.74427200  | 5.41016600  |
| C  | 2.27666500  | -0.70541300 | -0.44355200 |
| C  | 2.66141900  | -0.81484700 | -1.79148100 |
| C  | 3.26093000  | -0.49536700 | 0.53357400  |
| C  | 4.00267300  | -0.69001900 | -2.15464200 |
| H  | 1.91391500  | -1.01185300 | -2.55375300 |
| C  | 4.60451000  | -0.37534000 | 0.16547100  |
| H  | 2.98892800  | -0.43172200 | 1.58128400  |
| C  | 4.97823900  | -0.46686100 | -1.17695700 |
| H  | 4.28598000  | -0.77568000 | -3.19978200 |
| H  | 5.35694700  | -0.21511900 | 0.93248600  |
| H  | 6.02292600  | -0.37455400 | -1.46007800 |
| Se | -0.12900900 | -3.01612000 | -0.35821600 |
| P  | -0.58053100 | 0.37452000  | -1.50370200 |
| C  | -2.34152400 | 0.06034900  | -1.05200100 |
| C  | -3.18275500 | -0.32682100 | -2.10893300 |
| C  | -2.88656000 | 0.16371600  | 0.24046500  |
| C  | -4.53705100 | -0.59149000 | -1.88552800 |
| H  | -2.77246600 | -0.42918900 | -3.10963800 |
| C  | -4.23718300 | -0.10791700 | 0.46462400  |
| H  | -2.25743600 | 0.44889500  | 1.07693600  |
| C  | -5.06609700 | -0.48298500 | -0.59798500 |
| H  | -5.17214800 | -0.88968800 | -2.71476300 |
| H  | -4.64089800 | -0.03087300 | 1.47037400  |
| H  | -6.11676100 | -0.69465700 | -0.42023100 |
| C  | -0.23890100 | 2.10809900  | -0.94483200 |
| C  | 1.03916800  | 2.62808900  | -1.23445300 |
| C  | -1.18799000 | 2.96264600  | -0.35852400 |
| C  | 1.36871700  | 3.94462300  | -0.90879700 |
| H  | 1.78190500  | 1.99957200  | -1.71762800 |
| C  | -0.86167100 | 4.28686700  | -0.04967900 |
| H  | -2.18870100 | 2.60306500  | -0.14850200 |
| C  | 0.41815200  | 4.78063100  | -0.31322700 |
| H  | 2.36322900  | 4.32033700  | -1.13304600 |
| H  | -1.61289700 | 4.93117000  | 0.39903200  |
| H  | 0.66958800  | 5.80894800  | -0.06956800 |

1c  $\text{Ph}_2\text{P-NHR}$

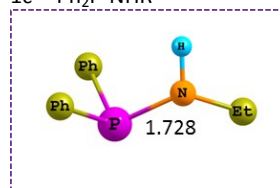

|   |             |            |             |
|---|-------------|------------|-------------|
| P | -0.01100000 | 0.65676200 | -0.92854400 |
|---|-------------|------------|-------------|

|   |             |             |             |
|---|-------------|-------------|-------------|
| C | 1.48408900  | -0.27502500 | -0.35967600 |
| C | 2.58946700  | 0.38822000  | 0.19724500  |
| C | 1.58567600  | -1.65617000 | -0.60565900 |
| C | 3.75614000  | -0.31358000 | 0.51691900  |
| H | 2.53059700  | 1.45656500  | 0.37930200  |
| C | 2.75190100  | -2.35504100 | -0.29001400 |
| H | 0.74582700  | -2.19386100 | -1.03777900 |
| C | 3.84254500  | -1.68635800 | 0.27519500  |
| H | 4.59824300  | 0.21648500  | 0.95384100  |
| H | 2.80753200  | -3.42286200 | -0.48312800 |
| H | 4.74960500  | -2.23052900 | 0.52230000  |
| C | -1.37157300 | -0.43390900 | -0.26333100 |
| C | -2.48617400 | -0.66414800 | -1.08431800 |
| C | -1.36836800 | -0.98241400 | 1.03150600  |
| C | -3.57208700 | -1.41981500 | -0.62754700 |
| H | -2.50238900 | -0.25017600 | -2.08970200 |
| C | -2.45111200 | -1.73219500 | 1.49279400  |
| H | -0.50795700 | -0.83563300 | 1.67992700  |
| C | -3.55658300 | -1.95278000 | 0.66258900  |
| H | -4.42519900 | -1.59051400 | -1.27833800 |
| H | -2.43223600 | -2.14986300 | 2.49584400  |
| H | -4.39768300 | -2.53949600 | 1.02104200  |
| N | 0.05281600  | 2.00703800  | 0.14833300  |
| H | 0.01157700  | 1.78082100  | 1.14035600  |
| C | -0.73340100 | 3.20543800  | -0.17196200 |
| H | -0.62513900 | 3.38974700  | -1.24640200 |
| H | -1.80907300 | 3.05819400  | 0.01853700  |
| C | -0.23784200 | 4.41673800  | 0.61814900  |
| H | 0.81540500  | 4.61852500  | 0.39886000  |
| H | -0.82532500 | 5.30635000  | 0.36570200  |
| H | -0.33456200 | 4.25179500  | 1.69811900  |

|   |             |             |             |
|---|-------------|-------------|-------------|
| C | -4.99773900 | 3.47493400  | 0.14351200  |
| H | -4.47293500 | 2.28162400  | 1.85633500  |
| C | -4.88336700 | 3.63355000  | -1.23967400 |
| H | -4.03921500 | 2.83504200  | -3.05998000 |
| H | -5.57355400 | 4.18620200  | 0.72921300  |
| H | -5.36981300 | 4.46910300  | -1.73489100 |
| P | 2.33477000  | -0.08211900 | 0.43421100  |
| C | 2.99123500  | -1.39961000 | -0.66441900 |
| C | 3.05229300  | -1.19884200 | -2.05458500 |
| C | 3.32162300  | -2.66317700 | -0.14673900 |
| C | 3.45129900  | -2.23236000 | -2.90394100 |
| H | 2.79244300  | -0.23207400 | -2.47596000 |
| C | 3.72585400  | -3.69446200 | -0.99941100 |
| H | 3.25827900  | -2.83267000 | 0.92335200  |
| C | 3.79283900  | -3.48314200 | -2.37919000 |
| H | 3.49723900  | -2.05942600 | -3.97565400 |
| H | 3.98467500  | -4.66441700 | -0.58330300 |
| H | 4.10547800  | -4.28606200 | -3.04090700 |
| C | 3.11709000  | 1.45783300  | -0.24276300 |
| C | 2.31873100  | 2.59736700  | -0.42135300 |
| C | 4.49313800  | 1.53897500  | -0.52127600 |
| C | 2.88529700  | 3.79654000  | -0.86837700 |
| H | 1.25391500  | 2.53694700  | -0.21135900 |
| C | 5.05855800  | 2.73554500  | -0.96464900 |
| H | 5.12563900  | 0.66184800  | -0.40592500 |
| C | 4.25357200  | 3.86788000  | -1.13882600 |
| H | 2.25586000  | 4.67167600  | -1.00470600 |
| H | 6.12279100  | 2.78484300  | -1.17905200 |
| H | 4.69344700  | 4.79886600  | -1.48585800 |
| C | 2.67305900  | 0.15117300  | 3.16477000  |
| H | 2.98793200  | 1.20357000  | 3.24645000  |
| H | 1.57918000  | 0.14366800  | 3.14908400  |
| C | 3.19211800  | -0.63631500 | 4.36760600  |
| H | 2.84630600  | -0.17732400 | 5.30045500  |
| H | 2.83772000  | -1.67152100 | 4.33626200  |
| H | 4.28894300  | -0.65157400 | 4.39300200  |
| N | 3.13148100  | -0.45592400 | 1.90498800  |
| H | 4.14717900  | -0.49108100 | 1.84150200  |

c-TS1

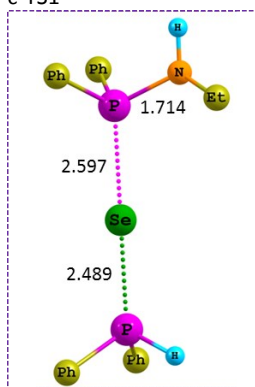

|    |             |             |             |
|----|-------------|-------------|-------------|
| Se | -0.24964300 | 0.03504100  | 0.66239500  |
| P  | -2.73068900 | 0.08990200  | 0.85340500  |
| H  | -3.25119500 | 0.23571400  | 2.16307600  |
| C  | -3.60090500 | -1.44054300 | 0.29499600  |
| C  | -5.00296900 | -1.53532300 | 0.27965800  |
| C  | -2.83244700 | -2.54001400 | -0.11146400 |
| C  | -5.62405600 | -2.71592600 | -0.13126400 |
| H  | -5.61025500 | -0.68572000 | 0.58001300  |
| C  | -3.45786900 | -3.72174800 | -0.52395300 |
| H  | -1.74846800 | -2.46218700 | -0.10409000 |
| C  | -4.85132700 | -3.81181900 | -0.53331000 |
| H  | -6.70866600 | -2.78087900 | -0.13929200 |
| H  | -2.85364400 | -4.56821200 | -0.83820100 |
| H  | -5.33629500 | -4.72969400 | -0.85408900 |
| C  | -3.62667900 | 1.46823400  | 0.03894000  |
| C  | -3.50472100 | 1.64391600  | -1.35009400 |
| C  | -4.37428200 | 2.39695800  | 0.78005000  |
| C  | -4.13656500 | 2.71384800  | -1.98474000 |
| H  | -2.90940000 | 0.94622800  | -1.93305300 |

2c Ph<sub>2</sub>P(Se)-NHR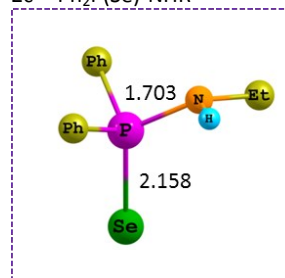

|   |             |             |             |
|---|-------------|-------------|-------------|
| P | -0.00448900 | 0.44427200  | 0.08093100  |
| C | -1.28706000 | -0.86116300 | -0.10512900 |
| C | -1.81800100 | -1.13882600 | -1.37309500 |
| C | -1.71766100 | -1.61093000 | 1.00177200  |
| C | -2.75709600 | -2.15996900 | -1.53347900 |
| H | -1.50586300 | -0.54083500 | -2.22402800 |
| C | -2.66270000 | -2.62682100 | 0.83834800  |
| H | -1.32322200 | -1.39031500 | 1.98822800  |
| C | -3.18096800 | -2.90568400 | -0.42956000 |
| H | -3.16291200 | -2.36605600 | -2.51975600 |
| H | -2.99512900 | -3.19663700 | 1.70159100  |
| H | -3.91595400 | -3.69580100 | -0.55533500 |
| C | 1.62590600  | -0.40838400 | 0.13451700  |
| C | 2.57683000  | -0.16411400 | -0.86470400 |
| C | 1.92235100  | -1.31934100 | 1.16341700  |
| C | 3.81116600  | -0.81903400 | -0.83466800 |

|    |             |             |             |
|----|-------------|-------------|-------------|
| H  | 2.34574100  | 0.54553500  | -1.65378300 |
| C  | 3.15717300  | -1.97034100 | 1.19047900  |
| H  | 1.19279400  | -1.52116800 | 1.94069300  |
| C  | 4.10331200  | -1.72185400 | 0.19070500  |
| H  | 4.54296700  | -0.62043300 | -1.61245300 |
| H  | 3.37864300  | -2.67204700 | 1.98968600  |
| H  | 5.06316900  | -2.23028800 | 0.21211800  |
| Se | -0.14366700 | 1.96730900  | -1.44139900 |
| N  | -0.16812200 | 0.89511300  | 1.71516500  |
| H  | 0.71121200  | 1.22741700  | 2.10184200  |
| C  | -1.32412800 | 1.69508100  | 2.17115900  |
| H  | -1.63829900 | 1.30637900  | 3.14858900  |
| H  | -2.15322900 | 1.51627600  | 1.47946800  |
| C  | -1.03511200 | 3.19464000  | 2.26682800  |
| H  | -0.76620600 | 3.60146400  | 1.28835100  |
| H  | -1.91755900 | 3.72782700  | 2.63821100  |
| H  | -0.21137300 | 3.39073700  | 2.96446600  |

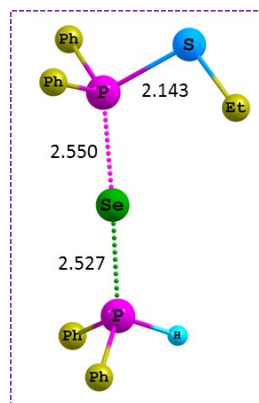

|    |             |             |             |
|----|-------------|-------------|-------------|
| Se | 0.26300000  | -0.01677400 | 0.61391500  |
| P  | 2.78036100  | 0.02172200  | 0.83495300  |
| H  | 3.26812300  | 0.07671300  | 2.16400700  |
| C  | 3.68848000  | 1.45648700  | 0.14223600  |
| C  | 4.48538400  | 2.28359900  | 0.94980400  |
| C  | 3.53351300  | 1.77599700  | -1.21752400 |
| C  | 5.12602000  | 3.40128500  | 0.40558500  |
| H  | 4.60920800  | 2.05751000  | 2.00567800  |
| C  | 4.18232100  | 2.88528600  | -1.76099000 |
| H  | 2.89856800  | 1.15973700  | -1.84831700 |
| C  | 4.97935500  | 3.70170200  | -0.95076700 |
| H  | 5.73987800  | 4.03279600  | 1.04182400  |
| H  | 4.05761000  | 3.11890400  | -2.81457300 |
| H  | 5.47832700  | 4.56870400  | -1.37419100 |
| C  | 3.66738500  | -1.46564100 | 0.19130700  |
| C  | 2.90931100  | -2.58308300 | -0.18656500 |
| C  | 5.06769700  | -1.51557000 | 0.08589100  |
| C  | 3.54372400  | -3.73950300 | -0.65298600 |
| H  | 1.82555100  | -2.53907100 | -0.11799100 |
| C  | 5.69777300  | -2.67024200 | -0.38170400 |
| H  | 5.66601500  | -0.65168200 | 0.36164200  |
| C  | 4.93615600  | -3.78525500 | -0.75014200 |
| H  | 2.94751800  | -4.60023800 | -0.94289000 |
| H  | 6.78114500  | -2.69983600 | -0.45945400 |
| H  | 5.42816000  | -4.68290100 | -1.11436300 |
| P  | -2.26873400 | 0.00236100  | 0.31367500  |
| C  | -2.94973500 | 1.64737300  | -0.16277900 |
| C  | -4.11291300 | 1.79404100  | -0.93501300 |
| C  | -2.26470400 | 2.79272100  | 0.27467000  |
| C  | -4.58675600 | 3.06847800  | -1.25783900 |
| H  | -4.64631200 | 0.91776000  | -1.28975600 |
| C  | -2.74404500 | 4.06418800  | -0.04651700 |
| H  | -1.35101100 | 2.68153400  | 0.85146200  |
| C  | -3.90545000 | 4.20479400  | -0.81264100 |
| H  | -5.48720300 | 3.17130600  | -1.85714700 |
| H  | -2.20559500 | 4.94375600  | 0.29508700  |
| H  | -4.27464100 | 5.19473000  | -1.06606800 |
| C  | -2.89400400 | -1.13966800 | -0.99973700 |
| C  | -2.12152700 | -1.25490100 | -2.16881500 |
| C  | -4.06257100 | -1.90517200 | -0.87538000 |
| C  | -2.52680300 | -2.10171000 | -3.20234700 |
| H  | -1.19792700 | -0.69019700 | -2.26157400 |
| C  | -4.46049200 | -2.75985500 | -1.90853200 |
| H  | -4.65787500 | -1.83367700 | 0.03014700  |
| C  | -3.69694100 | -2.85750400 | -3.07458500 |
| H  | -1.92253700 | -2.17910200 | -4.10199400 |
| H  | -5.36782100 | -3.34787200 | -1.79943300 |
| H  | -4.00714300 | -3.52231700 | -3.87595800 |
| C  | -2.42632400 | -1.70169700 | 2.88168600  |
| H  | -2.60348200 | -2.64820900 | 2.36296700  |
| H  | -1.37366500 | -1.43021100 | 2.76229100  |
| C  | -2.81201100 | -1.80839500 | 4.35671700  |

1d Ph<sub>2</sub>P-SR

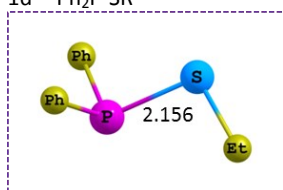

|   |             |             |             |
|---|-------------|-------------|-------------|
| P | -0.05614700 | 0.47270600  | 0.88353400  |
| C | 1.61162500  | -0.04374100 | 0.25863100  |
| C | 1.81260700  | -0.96349000 | -0.78232100 |
| C | 2.73336900  | 0.51962900  | 0.89062200  |
| C | 3.10606300  | -1.30541300 | -1.18575900 |
| H | 0.95983700  | -1.41823200 | -1.27633700 |
| C | 4.02550600  | 0.18220000  | 0.48342200  |
| H | 2.59300500  | 1.22483600  | 1.70582500  |
| C | 4.21447800  | -0.73254800 | -0.55660600 |
| H | 3.24620900  | -2.01856300 | -1.99334300 |
| H | 4.88208200  | 0.62738900  | 0.98160100  |
| H | 5.21902500  | -1.00067300 | -0.87123600 |
| C | -1.12642300 | -0.94948200 | 0.34382500  |
| C | -1.20231000 | -2.03939400 | 1.22921700  |
| C | -1.88523500 | -0.98529000 | -0.83435600 |
| C | -1.99602400 | -3.14842300 | 0.93075600  |
| H | -0.63773800 | -2.02105900 | 2.15887700  |
| C | -2.68996700 | -2.09098300 | -1.12783700 |
| H | -1.84821400 | -0.14399000 | -1.52028800 |
| C | -2.74462800 | -3.17627400 | -0.25006300 |
| H | -2.03828500 | -3.98381900 | 1.62403100  |
| H | -3.27243400 | -2.10259900 | -2.04513400 |
| H | -3.37067800 | -4.03384300 | -0.47936600 |
| C | -1.72664700 | 3.00898200  | 0.39681900  |
| H | -2.63494600 | 2.40633800  | 0.48664800  |
| H | -1.33833700 | 3.19888900  | 1.40120600  |
| C | -2.01996900 | 4.31843000  | -0.33391500 |
| H | -2.77397100 | 4.89037800  | 0.21841100  |
| H | -1.11999900 | 4.93529500  | -0.42036300 |
| H | -2.40685600 | 4.13686500  | -1.34179700 |
| S | -0.45569800 | 2.04043600  | -0.54102200 |

d-TS1

|   |             |             |            |
|---|-------------|-------------|------------|
| H | -2.22301900 | -2.60090300 | 4.83242600 |
| H | -2.61389700 | -0.87127300 | 4.88601700 |
| H | -3.87127600 | -2.05625200 | 4.48349300 |
| S | -3.43938300 | -0.38044900 | 2.06787000 |

2d Ph<sub>2</sub>P(Se)-SR

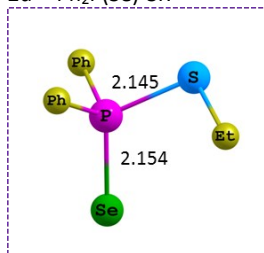

|    |             |             |             |
|----|-------------|-------------|-------------|
| P  | -0.01402800 | -0.30836400 | 0.19104000  |
| C  | -1.72912300 | 0.23527400  | -0.16892200 |
| C  | -2.06960900 | 1.59174300  | -0.27265100 |
| C  | -2.73402600 | -0.74124700 | -0.27253500 |
| C  | -3.39938300 | 1.96474200  | -0.48974200 |
| H  | -1.30731100 | 2.35804400  | -0.18362800 |
| C  | -4.05783400 | -0.36311300 | -0.49573500 |
| H  | -2.48042500 | -1.79183300 | -0.17008000 |
| C  | -4.39338700 | 0.99069500  | -0.60468500 |
| H  | -3.65442600 | 3.01772800  | -0.56736000 |
| H  | -4.82740700 | -1.12500300 | -0.57870700 |
| H  | -5.42564600 | 1.28358000  | -0.77390500 |
| C  | 1.05299300  | 1.18331600  | 0.00417100  |
| C  | 1.65831400  | 1.75145900  | 1.13373900  |
| C  | 1.26128500  | 1.76343200  | -1.25857200 |
| C  | 2.45405200  | 2.89339700  | 1.00317600  |
| H  | 1.51035200  | 1.29122800  | 2.10589800  |
| C  | 2.05754300  | 2.90334800  | -1.38394200 |
| H  | 0.81163600  | 1.31939500  | -2.14126200 |
| C  | 2.65452100  | 3.47076400  | -0.25305400 |
| H  | 2.91996100  | 3.32567500  | 1.88402200  |
| H  | 2.21500500  | 3.34394400  | -2.36430800 |
| H  | 3.27701500  | 4.35548000  | -0.35309500 |
| Se | 0.23211100  | -1.31606900 | 2.07858700  |
| C  | 1.96973300  | -2.28794700 | -1.10616800 |
| H  | 2.74232300  | -1.51501100 | -1.14475300 |
| H  | 1.89137000  | -2.65649000 | -0.07961100 |
| C  | 2.27749000  | -3.42166600 | -2.08446300 |
| H  | 3.24067400  | -3.87353000 | -1.82254000 |
| H  | 1.51266800  | -4.20307700 | -2.04105400 |
| H  | 2.34441400  | -3.06215600 | -3.11638700 |
| S  | 0.34581400  | -1.51883400 | -1.54340600 |

1e Ph<sub>2</sub>P-OR

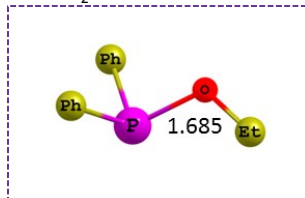

|   |             |             |             |
|---|-------------|-------------|-------------|
| P | 0.01596900  | 0.62280400  | -1.02879200 |
| C | -1.47964700 | -0.24576000 | -0.38131800 |
| C | -1.68910300 | -1.59010700 | -0.73331200 |
| C | -2.46363700 | 0.42090500  | 0.36317200  |
| C | -2.84927800 | -2.25665600 | -0.33765700 |
| H | -0.93903000 | -2.12535000 | -1.31095000 |
| C | -3.62586000 | -0.24933000 | 0.75914000  |
| H | -2.31050600 | 1.45838900  | 0.63943800  |
| C | -3.82324900 | -1.58705500 | 0.41067400  |
| H | -2.99243000 | -3.29806200 | -0.61215300 |

|   |             |             |             |
|---|-------------|-------------|-------------|
| H | -4.37659500 | 0.27787100  | 1.34167300  |
| H | -4.72729800 | -2.10493200 | 0.71796800  |
| C | 1.36151300  | -0.40644400 | -0.26992400 |
| C | 2.34843500  | -0.93498200 | -1.11444700 |
| C | 1.44255100  | -0.65492100 | 1.11107000  |
| C | 3.39131400  | -1.71095400 | -0.59522900 |
| H | 2.30231000  | -0.73679600 | -2.18283300 |
| C | 2.48754800  | -1.41778000 | 1.63176000  |
| H | 0.68436000  | -0.24850100 | 1.77445000  |
| C | 3.46181800  | -1.95072300 | 0.77805800  |
| H | 4.14719400  | -2.11880300 | -1.26050600 |
| H | 2.54211600  | -1.60363600 | 2.70094400  |
| H | 4.27242600  | -2.54854800 | 1.18525600  |
| O | -0.04526000 | 1.94431400  | 0.01504200  |
| C | 0.76546400  | 3.08411200  | -0.31928100 |
| H | 1.82645500  | 2.82985300  | -0.18847900 |
| H | 0.60950500  | 3.35277200  | -1.37322300 |
| C | 0.37792400  | 4.23243600  | 0.59717800  |
| H | 0.98937600  | 5.11347900  | 0.37277900  |
| H | -0.67511400 | 4.49834600  | 0.46232900  |
| H | 0.53502300  | 3.96089500  | 1.64556000  |

e-TS1

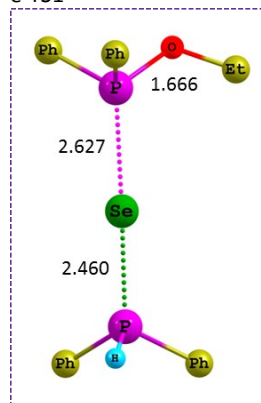

|    |             |             |             |
|----|-------------|-------------|-------------|
| Se | 0.30550200  | -0.21570500 | -0.29565100 |
| P  | 2.69163600  | -0.14449400 | -0.88955800 |
| H  | 2.99612600  | -0.45742200 | -2.23692800 |
| C  | 3.80979600  | -1.33644100 | -0.05857000 |
| C  | 4.41777500  | -2.38177100 | -0.77138000 |
| C  | 3.99969400  | -1.25637600 | 1.33145000  |
| C  | 5.21107700  | -3.32340400 | -0.10856600 |
| H  | 4.27415800  | -2.46419300 | -1.84562100 |
| C  | 4.79950900  | -2.19147100 | 1.98914900  |
| H  | 3.51891100  | -0.46424300 | 1.89911200  |
| C  | 5.40615300  | -3.22849200 | 1.27144300  |
| H  | 5.67685200  | -4.12706900 | -0.67211200 |
| H  | 4.94391500  | -2.11520800 | 3.06318700  |
| H  | 6.02458200  | -3.95832400 | 1.78607100  |
| C  | 3.51364900  | 1.49681700  | -0.70456500 |
| C  | 2.74501400  | 2.59502100  | -0.29547500 |
| C  | 4.88149800  | 1.67333700  | -0.97490300 |
| C  | 3.33648300  | 3.85576100  | -0.15965000 |
| H  | 1.68798100  | 2.45529900  | -0.08482400 |
| C  | 5.46812400  | 2.93257100  | -0.84029100 |
| H  | 5.49051900  | 0.82725900  | -1.28184000 |
| C  | 4.69537100  | 4.02623500  | -0.43209700 |
| H  | 2.73313200  | 4.70094000  | 0.15951200  |
| H  | 6.52618900  | 3.06064900  | -1.05155300 |
| H  | 5.15396200  | 5.00551700  | -0.32627700 |
| P  | -2.24698800 | -0.24108900 | 0.32571600  |
| C  | -3.04279600 | 1.37554200  | 0.67092800  |
| C  | -2.99097100 | 2.36856000  | -0.32177800 |
| C  | -3.63469600 | 1.67150300  | 1.90750500  |

|   |             |             |             |
|---|-------------|-------------|-------------|
| C | -3.54098600 | 3.62937500  | -0.08814000 |
| H | -2.51607800 | 2.15805200  | -1.27675600 |
| C | -4.18192300 | 2.93795900  | 2.13871900  |
| H | -3.66534300 | 0.91143600  | 2.68045600  |
| C | -4.13848400 | 3.91782600  | 1.14403100  |
| H | -3.49835700 | 4.38772900  | -0.86502000 |
| H | -4.64100300 | 3.15660900  | 3.09916300  |
| H | -4.56293300 | 4.90104400  | 1.32707200  |
| C | -3.35148300 | -0.98561900 | -0.95521000 |
| C | -2.79357300 | -1.42564300 | -2.16379800 |
| C | -4.73078400 | -1.14375000 | -0.73390700 |
| C | -3.60561700 | -2.00581300 | -3.14499300 |
| H | -1.72483500 | -1.31430100 | -2.32799200 |
| C | -5.53718600 | -1.72957400 | -1.71005500 |
| H | -5.17033600 | -0.80762600 | 0.20107400  |
| C | -4.97522500 | -2.15882900 | -2.91909400 |
| H | -3.16587700 | -2.34149800 | -4.08015200 |
| H | -6.60269000 | -1.84802700 | -1.53242100 |
| H | -5.60539100 | -2.61129700 | -3.67995100 |
| O | -2.69638700 | -1.03720400 | 1.71818800  |
| C | -2.06654900 | -2.30253700 | 2.01829500  |
| H | -2.42940000 | -3.05886000 | 1.30975500  |
| H | -0.98198500 | -2.20556400 | 1.89147200  |
| C | -2.42759800 | -2.68204200 | 3.44403800  |
| H | -1.97697900 | -3.64869700 | 3.69546700  |
| H | -2.05601300 | -1.93348800 | 4.15080400  |
| H | -3.51245700 | -2.76580700 | 3.56407900  |

|    |             |             |             |
|----|-------------|-------------|-------------|
| P  | -0.01155700 | -0.49311000 | -0.08361900 |
| C  | 1.61614200  | 0.32782000  | 0.02377300  |
| C  | 2.08476200  | 1.03458100  | -1.09488000 |
| C  | 2.40334100  | 0.26144800  | 1.18259700  |
| C  | 3.32112600  | 1.67915600  | -1.04882900 |
| H  | 1.48993500  | 1.06868500  | -2.00313200 |
| C  | 3.64420200  | 0.90471100  | 1.22071000  |
| H  | 2.04883500  | -0.29465600 | 2.04277100  |
| C  | 4.10369100  | 1.61484000  | 0.10906800  |
| H  | 3.67645700  | 2.22387800  | -1.91870500 |
| H  | 4.25135900  | 0.84576300  | 2.11965900  |
| H  | 5.06872500  | 2.11261000  | 0.14164400  |
| C  | -1.26653800 | 0.84583100  | -0.01097100 |
| C  | -2.27608400 | 0.94884200  | -0.97613700 |
| C  | -1.21186800 | 1.78115500  | 1.03746400  |
| C  | -3.22414200 | 1.97305900  | -0.89319400 |
| H  | -2.31165500 | 0.22526700  | -1.78538800 |
| C  | -2.16121800 | 2.80071700  | 1.11845500  |
| H  | -0.42933500 | 1.71459900  | 1.78784400  |
| C  | -3.16857100 | 2.89845800  | 0.15198100  |
| H  | -4.00365700 | 2.04604000  | -1.64616800 |
| H  | -2.11273600 | 3.51989300  | 1.93119200  |
| H  | -3.90504900 | 3.69471300  | 0.21398700  |
| Se | -0.25920000 | -1.83143900 | -1.73261600 |
| O  | -0.06428600 | -1.16382400 | 1.41292500  |
| C  | -1.15489200 | -2.03699600 | 1.79589600  |
| H  | -2.08097600 | -1.45006100 | 1.83220700  |
| H  | -1.26513700 | -2.81574400 | 1.03396000  |
| C  | -0.82416200 | -2.62832200 | 3.15423100  |
| H  | -1.63531700 | -3.29235100 | 3.47237100  |
| H  | 0.10081200  | -3.21097100 | 3.10871400  |
| H  | -0.70658200 | -1.84330000 | 3.90787000  |

2e Ph<sub>2</sub>P(Se)-OR

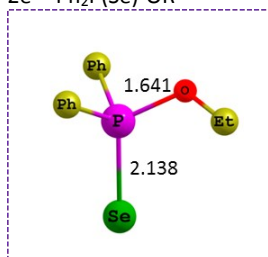

## References

- 1 T. Qi, H.-Q. Yang, D. M. Whitfield, K. Yu and C.-W. Hu, *J. Phys. Chem. A*, 2016, **120**, 918–931.
- 2 K. Yu, X. Liu, T. Qi, H.-Q. Yang, D. M. Whitfield, Q. Y. Chen, E. J. C. Huisman and C.-W. Hu, *Nat. Commun.*, 2016, **7**, doi:10.1038/ncomms12223.
- 3 K. Yu, X. Y. Liu, Q. Y. Chen, H. Q. Yang, M. L. Yang, X. Q. Wang, X. Wang, H. Cao, D. M. Whitfield and C. W. Hu, *Angew. Chem. Int. Ed.*, 2014, **53**, 6898–6904.
- 4 K. Yu, X. Y. Liu, Q. Zeng, M. L. Yang, J. Y. Ouyang, X. Q. Wang and Y. Tao, *Angew. Chem. Int. Ed.*, 2013, **52**, 11034–11039.
- 5 K. Yu, X. Y. Liu, Q. Zeng, D. M. Leek, J. Y. Ouyang, K. M. Whitmore, J. A. Ripmeester, Y. Tao and M. L. Yang, *Angew. Chem. Int. Ed.*, 2013, **52**, 4823–4828.
- 6 Z. H. Sun, H. Oyanagi, H. Nakamura, Y. Jiang, L. Zhang, M. Uehara, K. Yamashita, A. Fukano and H. Maeda, *J. Phys. Chem. C*, 2010, **114**, 10126–10131.
- 7 W.-J. van Zeist and F. M. Bickelhaupt, *Org. Biomol. Chem.*, 2010, **8**, 3118–3127.
- 8 H. Eyring, *J. Chem. Phys.* 1935, **3**, 107.
- 9 E. Wigner, *J. Chem. Phys.* 1937, **5**, 720–725.
- 10 S. Kozuch and S. Shaik, *J. Am. Chem. Soc.* 2006, **128**, 3355–3365.
- 11 S. Kozuch and S. Shaik, *J. Phys. Chem. A* 2008, **112**, 6032–6041.
- 12 A. Uhe and S. Kozuch, Shaik, *S. J. Comput. Chem.* 2011, **32**, 978–985.
- 13 C. J. Amatore and A. Jutand, *J. Organomet. Chem.* 1999, **576**, 254–278.
